# Supplementary material for: Protective Evidence for Alcohol Consumption in Parkinson’s Disease Risk and Associated Genes of DPP6, SLC39A8, MAD1L1, and RBFOX1
Source: Research Square preprint supplement (doi:10.21203/rs.3.rs-6754726/v1), 2025-05-29
Supplement: Supplementary file 1 [file 01ffb05773fefa0b675729d6.xlsx]

## Sheet: Table S4
Table S4. The GWAS data of exposure and outcome for MR analysis
Group	ID	Pheno or trait	Year	Pheno data type	Population	Sex	Sample size	n Case	n Control	Number of SNPs	URL	PMID	Author	Consortium	Build	Note	P-value threshold	Phenotype definition
Alcohol	ukb-b-5779	Alcohol intake frequency	2018	Categorical Ordered	European	Males and Females	462346			9851867	https://gwas.mrcieu.ac.uk/datasets/ukb-b-5779/		Ben Elsworth	MRC-IEU	HG19/GRCh37	1558: Output from GWAS pipeline using Phesant derived variables from UKBiobank	5e-08
Alcohol	ieu-b-73	Alcoholic drinks per week	2019	Continuous	European	Males and Females	335394			11887865	https://gwas.mrcieu.ac.uk/datasets/ieu-b-73/		Liu, M	GWAS and Sequencing Consortium of Alcohol and Nicotine use	HG19/GRCh37	NA	5e-08
Alcohol	ieu-a-1283	Alcohol consumption	2017	Risk factor	European	Males and Females	112117			12935395	https://gwas.mrcieu.ac.uk/datasets/ieu-a-1283/		Clarke	UK Biobank	HG19/GRCh37	NA	5e-08
Tea	ukb-b-6066	Tea intake	2018	Continuous	European	Males and Females	447485			9851867	https://gwas.mrcieu.ac.uk/datasets/ukb-b-6066/		Ben Elsworth	MRC-IEU	HG19/GRCh37	1488: Output from GWAS pipeline using Phesant derived variables from UKBiobank	5e-08
Coffee	ukb-b-5237	Coffee intake	2018	Categorical Ordered	European	Males and Females	428860			9851867	https://gwas.mrcieu.ac.uk/datasets/ukb-b-5237/		Ben Elsworth	MRC-IEU	HG19/GRCh37	1498: Output from GWAS pipeline using Phesant derived variables from UKBiobank	5e-08
Sleep	ukb-b-3957	Sleeplessness / insomnia	2018	Categorical Ordered	European	Males and Females	462341			9851867	https://gwas.mrcieu.ac.uk/datasets/ukb-b-3957/		Ben Elsworth	MRC-IEU	HG19/GRCh37	1200: Output from GWAS pipeline using Phesant derived variables from UKBiobank	5e-08
Sleep	ukb-b-4424	Sleep duration	2018	Categorical Ordered	European	Males and Females	460099			9851867	https://gwas.mrcieu.ac.uk/datasets/ukb-b-4424/		Ben Elsworth	MRC-IEU	HG19/GRCh37	1160: Output from GWAS pipeline using Phesant derived variables from UKBiobank	5e-08
Sleep	ukb-b-sleep		2018	Categorical Ordered	European	Males and Females	361194			11120383	https://gwas.mrcieu.ac.uk/datasets/ukb-d-SLEEP/		Yuxiao Ling	MRC-IEU	HG19/GRCh37	NA	5e-08
Sleep	-	Chronotype	2023	Categorical (single)	European	Males and Females	449734			152(p<5×10-8)	https://pubmed.ncbi.nlm.nih.gov/36608706/	36608706	Yuxiao Ling	UK Biobank and 23andMe	HG19		5e-08	Considering yourself as morning/evening person (ordered categorical variable of definitely a morning person, more a morning than an evening person, do not know, more an evening than morning person and definitely an evening person)
Sleep	-	Daytime_napping	2023	Categorical (single)	European	Males and Females	452,633 (255,746/172,897/23,990)			123(p<5×10-8)	https://pubmed.ncbi.nlm.nih.gov/36608706/	36608706	Yuxiao Ling	UK Biobank	HG19		5e-08	Having a nap during the day (ordered categorical variable of never/rarely, sometimes, usually)
Sleep	-	Daytime_sleepiness	2023	Categorical (single)	European	Males and Females	452,071 (347,285/92,794/11,963/29)			37(p<5×10-8)	https://pubmed.ncbi.nlm.nih.gov/36608706/	36608706	Yuxiao Ling	UK Biobank	HG19		5e-08	Unconsciously dozing off or falling asleep during the day (ordered categorical variable of never, sometimes, often and all the time)
Sleep	-	Frequent_insomnia	2023	Categorical (single)	European	Males and Females	453,379 (129,270/108,357)			48(p<5×10-8)	https://pubmed.ncbi.nlm.nih.gov/36608706/	36608706	Yuxiao Ling	UK Biobank	HG19		5e-08	Difficulty falling asleep at night or waking up in the middle of the night (binary variable of “usually” vs “never/rarely”)
Sleep	-	Long_sleep_duration	2023	Categorical (single)	European	Males and Females	339,926 (34,184/305,742)			8(p<5×10-8)	https://pubmed.ncbi.nlm.nih.gov/36608706/	36608706	Yuxiao Ling	UK Biobank	HG19		5e-08	Average sleep duration of 24h is 9h or more vs 7–8h (binary variable of yes/no)
Sleep	-	OSA	2023	Categorical (single)	European	Males and Females	217,955 (16,761/201,194)			5(p<5×10-8)	https://pubmed.ncbi.nlm.nih.gov/36608706/	36608706	Yuxiao Ling	FinnGen and UK Biobank	HG19		5e-08	Subjective symptoms, clinical examination and sleep registration applying AHI≥5/hour or respiratory event index (REI)≥5/hour (binary variable of yes/no)
Sleep	-	Short_sleep_duration	2023	Categorical (single)	European	Males and Females	411,934 (106,192/ 305,742)			27(p<5×10-8)	https://pubmed.ncbi.nlm.nih.gov/36608706/	36608706	Yuxiao Ling	UK Biobank	HG19		5e-08	Average sleep duration of 24h is 6h or less vs 7–8h (binary variable of yes/no)
Sleep	-	Snoring	2023	Categorical (single)	European	Males and Females	408,317 (151,077/ 257,240)			127(p<5×10-8)	https://pubmed.ncbi.nlm.nih.gov/36608706/	36608706	Yuxiao Ling	UK Biobank	HG19		5e-08	Creating noise while sleeping (binary variable of yes/no)
Inflammatory factor	GCST90274833	Stem cell factor levels	2023		European						https://pubmed.ncbi.nlm.nih.gov/37563310/	37563310	Zhao JH				5e-06
Inflammatory factor	GCST90274834	SIR2-like protein 2 levels	2023		European						https://pubmed.ncbi.nlm.nih.gov/37563310/	37563310	Zhao JH				5e-06
Inflammatory factor	GCST90274835	Signaling lymphocytic activation molecule levels	2023		European						https://pubmed.ncbi.nlm.nih.gov/37563310/	37563310	Zhao JH				5e-06
Inflammatory factor	GCST90274836	Sulfotransferase 1A1 levels	2023		European						https://pubmed.ncbi.nlm.nih.gov/37563310/	37563310	Zhao JH				5e-06
Inflammatory factor	GCST90274837	STAM binding protein levels	2023		European						https://pubmed.ncbi.nlm.nih.gov/37563310/	37563310	Zhao JH				5e-06
Inflammatory factor	GCST90274838	Transforming growth factor-alpha levels	2023		European						https://pubmed.ncbi.nlm.nih.gov/37563310/	37563310	Zhao JH				5e-06
Inflammatory factor	GCST90274839	Tumor necrosis factor levels	2023		European						https://pubmed.ncbi.nlm.nih.gov/37563310/	37563310	Zhao JH				5e-06
Inflammatory factor	GCST90274840	TNF-beta levels	2023		European						https://pubmed.ncbi.nlm.nih.gov/37563310/	37563310	Zhao JH				5e-06
Inflammatory factor	GCST90274841	Tumor necrosis factor receptor superfamily member 9 levels	2023		European						https://pubmed.ncbi.nlm.nih.gov/37563310/	37563310	Zhao JH				5e-06
Inflammatory factor	GCST90274842	Tumor necrosis factor ligand superfamily member 14 levels	2023		European						https://pubmed.ncbi.nlm.nih.gov/37563310/	37563310	Zhao JH				5e-06
Inflammatory factor	GCST90274843	TNF-related apoptosis-inducing ligand levels	2023		European						https://pubmed.ncbi.nlm.nih.gov/37563310/	37563310	Zhao JH				5e-06
Inflammatory factor	GCST90274844	TNF-related activation-induced cytokine levels	2023		European						https://pubmed.ncbi.nlm.nih.gov/37563310/	37563310	Zhao JH				5e-06
Inflammatory factor	GCST90274845	Thymic stromal lymphopoietin levels	2023		European						https://pubmed.ncbi.nlm.nih.gov/37563310/	37563310	Zhao JH				5e-06
Inflammatory factor	GCST90274846	Tumor necrosis factor ligand superfamily member 12 levels	2023		European						https://pubmed.ncbi.nlm.nih.gov/37563310/	37563310	Zhao JH				5e-06
Inflammatory factor	GCST90274847	Urokinase-type plasminogen activator levels	2023		European						https://pubmed.ncbi.nlm.nih.gov/37563310/	37563310	Zhao JH				5e-06
Inflammatory factor	GCST90274848	Vascular endothelial growth factor A levels	2023		European						https://pubmed.ncbi.nlm.nih.gov/37563310/	37563310	Zhao JH				5e-06
Inflammatory factor	GCST90274758	Eukaryotic translation initiation factor 4E-binding protein 1 levels	2023		European						https://pubmed.ncbi.nlm.nih.gov/37563310/	37563310	Zhao JH				5e-06
Inflammatory factor	GCST90274759	Adenosine Deaminase levels	2023		European						https://pubmed.ncbi.nlm.nih.gov/37563310/	37563310	Zhao JH				5e-06
Inflammatory factor	GCST90274760	Artemin levels	2023		European						https://pubmed.ncbi.nlm.nih.gov/37563310/	37563310	Zhao JH				5e-06
Inflammatory factor	GCST90274761	Axin-1 levels	2023		European						https://pubmed.ncbi.nlm.nih.gov/37563310/	37563310	Zhao JH				5e-06
Inflammatory factor	GCST90274762	beta-nerve growth factor levels	2023		European						https://pubmed.ncbi.nlm.nih.gov/37563310/	37563310	Zhao JH				5e-06
Inflammatory factor	GCST90274763	Caspase 8 levels	2023		European						https://pubmed.ncbi.nlm.nih.gov/37563310/	37563310	Zhao JH				5e-06
Inflammatory factor	GCST90274764	Eotaxin levels	2023		European						https://pubmed.ncbi.nlm.nih.gov/37563310/	37563310	Zhao JH				5e-06
Inflammatory factor	GCST90274765	C-C motif chemokine 19 levels	2023		European						https://pubmed.ncbi.nlm.nih.gov/37563310/	37563310	Zhao JH				5e-06
Inflammatory factor	GCST90274766	C-C motif chemokine 20 levels	2023		European						https://pubmed.ncbi.nlm.nih.gov/37563310/	37563310	Zhao JH				5e-06
Inflammatory factor	GCST90274767	C-C motif chemokine 23 levels	2023		European						https://pubmed.ncbi.nlm.nih.gov/37563310/	37563310	Zhao JH				5e-06
Inflammatory factor	GCST90274768	C-C motif chemokine 25 levels	2023		European						https://pubmed.ncbi.nlm.nih.gov/37563310/	37563310	Zhao JH				5e-06
Inflammatory factor	GCST90274769	C-C motif chemokine 28 levels	2023		European						https://pubmed.ncbi.nlm.nih.gov/37563310/	37563310	Zhao JH				5e-06
Inflammatory factor	GCST90274770	C-C motif chemokine 4 levels	2023		European						https://pubmed.ncbi.nlm.nih.gov/37563310/	37563310	Zhao JH				5e-06
Inflammatory factor	GCST90274771	Natural killer cell receptor 2B4 levels	2023		European						https://pubmed.ncbi.nlm.nih.gov/37563310/	37563310	Zhao JH				5e-06
Inflammatory factor	GCST90274772	CD40L receptor levels	2023		European						https://pubmed.ncbi.nlm.nih.gov/37563310/	37563310	Zhao JH				5e-06
Inflammatory factor	GCST90274773	T-cell surface glycoprotein CD5 levels	2023		European						https://pubmed.ncbi.nlm.nih.gov/37563310/	37563310	Zhao JH				5e-06
Inflammatory factor	GCST90274774	T-cell surface glycoprotein CD6 isoform levels	2023		European						https://pubmed.ncbi.nlm.nih.gov/37563310/	37563310	Zhao JH				5e-06
Inflammatory factor	GCST90274775	CUB domain-containing protein 1 levels	2023		European						https://pubmed.ncbi.nlm.nih.gov/37563310/	37563310	Zhao JH				5e-06
Inflammatory factor	GCST90274776	Macrophage colony-stimulating factor 1 levels	2023		European						https://pubmed.ncbi.nlm.nih.gov/37563310/	37563310	Zhao JH				5e-06
Inflammatory factor	GCST90274777	Cystatin D levels	2023		European						https://pubmed.ncbi.nlm.nih.gov/37563310/	37563310	Zhao JH				5e-06
Inflammatory factor	GCST90274778	Fractalkine levels	2023		European						https://pubmed.ncbi.nlm.nih.gov/37563310/	37563310	Zhao JH				5e-06
Inflammatory factor	GCST90274779	C-X-C motif chemokine 1 levels	2023		European						https://pubmed.ncbi.nlm.nih.gov/37563310/	37563310	Zhao JH				5e-06
Inflammatory factor	GCST90274780	C-X-C motif chemokine 10 levels	2023		European						https://pubmed.ncbi.nlm.nih.gov/37563310/	37563310	Zhao JH				5e-06
Inflammatory factor	GCST90274781	C-X-C motif chemokine 11 levels	2023		European						https://pubmed.ncbi.nlm.nih.gov/37563310/	37563310	Zhao JH				5e-06
Inflammatory factor	GCST90274782	C-X-C motif chemokine 5 levels	2023		European						https://pubmed.ncbi.nlm.nih.gov/37563310/	37563310	Zhao JH				5e-06
Inflammatory factor	GCST90274808	Interleukin-20 receptor subunit alpha levels	2023		European						https://pubmed.ncbi.nlm.nih.gov/37563310/	37563310	Zhao JH				5e-06
Inflammatory factor	GCST90274809	Interleukin-22 receptor subunit alpha-1 levels	2023		European						https://pubmed.ncbi.nlm.nih.gov/37563310/	37563310	Zhao JH				5e-06
Inflammatory factor	GCST90274810	Interleukin-24 levels	2023		European						https://pubmed.ncbi.nlm.nih.gov/37563310/	37563310	Zhao JH				5e-06
Inflammatory factor	GCST90274811	Interleukin-2 receptor subunit beta levels	2023		European						https://pubmed.ncbi.nlm.nih.gov/37563310/	37563310	Zhao JH				5e-06
Inflammatory factor	GCST90274812	Interleukin-33 levels	2023		European						https://pubmed.ncbi.nlm.nih.gov/37563310/	37563310	Zhao JH				5e-06
Inflammatory factor	GCST90274813	Interleukin-4 levels	2023		European						https://pubmed.ncbi.nlm.nih.gov/37563310/	37563310	Zhao JH				5e-06
Inflammatory factor	GCST90274814	Interleukin-5 levels	2023		European						https://pubmed.ncbi.nlm.nih.gov/37563310/	37563310	Zhao JH				5e-06
Inflammatory factor	GCST90274815	Interleukin-6 levels	2023		European						https://pubmed.ncbi.nlm.nih.gov/37563310/	37563310	Zhao JH				5e-06
Inflammatory factor	GCST90274816	Interleukin-7 levels	2023		European						https://pubmed.ncbi.nlm.nih.gov/37563310/	37563310	Zhao JH				5e-06
Inflammatory factor	GCST90274817	Interleukin-8 levels	2023		European						https://pubmed.ncbi.nlm.nih.gov/37563310/	37563310	Zhao JH				5e-06
Inflammatory factor	GCST90274818	Latency-associated peptide transforming growth factor beta 1 levels	2023		European						https://pubmed.ncbi.nlm.nih.gov/37563310/	37563310	Zhao JH				5e-06
Inflammatory factor	GCST90274819	Leukemia inhibitory factor levels	2023		European						https://pubmed.ncbi.nlm.nih.gov/37563310/	37563310	Zhao JH				5e-06
Inflammatory factor	GCST90274820	Leukemia inhibitory factor receptor levels	2023		European						https://pubmed.ncbi.nlm.nih.gov/37563310/	37563310	Zhao JH				5e-06
Inflammatory factor	GCST90274821	Monocyte chemoattractant protein-1 levels	2023		European						https://pubmed.ncbi.nlm.nih.gov/37563310/	37563310	Zhao JH				5e-06
Inflammatory factor	GCST90274822	Monocyte chemoattractant protein 2 levels	2023		European						https://pubmed.ncbi.nlm.nih.gov/37563310/	37563310	Zhao JH				5e-06
Inflammatory factor	GCST90274823	Monocyte chemoattractant protein-3 levels	2023		European						https://pubmed.ncbi.nlm.nih.gov/37563310/	37563310	Zhao JH				5e-06
Inflammatory factor	GCST90274824	Monocyte chemoattractant protein-4 levels	2023		European						https://pubmed.ncbi.nlm.nih.gov/37563310/	37563310	Zhao JH				5e-06
Inflammatory factor	GCST90274825	Macrophage inflammatory protein 1a levels	2023		European						https://pubmed.ncbi.nlm.nih.gov/37563310/	37563310	Zhao JH				5e-06
Inflammatory factor	GCST90274826	Matrix metalloproteinase-1 levels	2023		European						https://pubmed.ncbi.nlm.nih.gov/37563310/	37563310	Zhao JH				5e-06
Inflammatory factor	GCST90274827	Matrix metalloproteinase-10 levels	2023		European						https://pubmed.ncbi.nlm.nih.gov/37563310/	37563310	Zhao JH				5e-06
Inflammatory factor	GCST90274828	Neurturin levels	2023		European						https://pubmed.ncbi.nlm.nih.gov/37563310/	37563310	Zhao JH				5e-06
Inflammatory factor	GCST90274829	Neurotrophin-3 levels	2023		European						https://pubmed.ncbi.nlm.nih.gov/37563310/	37563310	Zhao JH				5e-06
Inflammatory factor	GCST90274830	Osteoprotegerin levels	2023		European						https://pubmed.ncbi.nlm.nih.gov/37563310/	37563310	Zhao JH				5e-06
Inflammatory factor	GCST90274831	Oncostatin-M levels	2023		European						https://pubmed.ncbi.nlm.nih.gov/37563310/	37563310	Zhao JH				5e-06
Inflammatory factor	GCST90274832	Programmed cell death 1 ligand 1 levels	2023		European						https://pubmed.ncbi.nlm.nih.gov/37563310/	37563310	Zhao JH				5e-06
Inflammatory factor	GCST90274783	C-X-C motif chemokine 6 levels	2023		European						https://pubmed.ncbi.nlm.nih.gov/37563310/	37563310	Zhao JH				5e-06
Inflammatory factor	GCST90274784	C-X-C motif chemokine 9 levels	2023		European						https://pubmed.ncbi.nlm.nih.gov/37563310/	37563310	Zhao JH				5e-06
Inflammatory factor	GCST90274785	Delta and Notch-like epidermal growth factor-related receptor levels	2023		European						https://pubmed.ncbi.nlm.nih.gov/37563310/	37563310	Zhao JH				5e-06
Inflammatory factor	GCST90274786	Protein S100-A12 levels	2023		European						https://pubmed.ncbi.nlm.nih.gov/37563310/	37563310	Zhao JH				5e-06
Inflammatory factor	GCST90274787	Fibroblast growth factor 19 levels	2023		European						https://pubmed.ncbi.nlm.nih.gov/37563310/	37563310	Zhao JH				5e-06
Inflammatory factor	GCST90274788	Fibroblast growth factor 21 levels	2023		European						https://pubmed.ncbi.nlm.nih.gov/37563310/	37563310	Zhao JH				5e-06
Inflammatory factor	GCST90274789	Fibroblast growth factor 23 levels	2023		European						https://pubmed.ncbi.nlm.nih.gov/37563310/	37563310	Zhao JH				5e-06
Inflammatory factor	GCST90274790	Fibroblast growth factor 5 levels	2023		European						https://pubmed.ncbi.nlm.nih.gov/37563310/	37563310	Zhao JH				5e-06
Inflammatory factor	GCST90274791	Fms-related tyrosine kinase 3 ligand levels	2023		European						https://pubmed.ncbi.nlm.nih.gov/37563310/	37563310	Zhao JH				5e-06
Inflammatory factor	GCST90274792	Glial cell line-derived neurotrophic factor levels	2023		European						https://pubmed.ncbi.nlm.nih.gov/37563310/	37563310	Zhao JH				5e-06
Inflammatory factor	GCST90274793	Hepatocyte growth factor levels	2023		European						https://pubmed.ncbi.nlm.nih.gov/37563310/	37563310	Zhao JH				5e-06
Inflammatory factor	GCST90274794	Interferon gamma levels	2023		European						https://pubmed.ncbi.nlm.nih.gov/37563310/	37563310	Zhao JH				5e-06
Inflammatory factor	GCST90274795	Interleukin-10 levels	2023		European						https://pubmed.ncbi.nlm.nih.gov/37563310/	37563310	Zhao JH				5e-06
Inflammatory factor	GCST90274796	Interleukin-10 receptor subunit alpha levels	2023		European						https://pubmed.ncbi.nlm.nih.gov/37563310/	37563310	Zhao JH				5e-06
Inflammatory factor	GCST90274797	Interleukin-10 receptor subunit beta levels	2023		European						https://pubmed.ncbi.nlm.nih.gov/37563310/	37563310	Zhao JH				5e-06
Inflammatory factor	GCST90274798	Interleukin-12 subunit beta levels	2023		European						https://pubmed.ncbi.nlm.nih.gov/37563310/	37563310	Zhao JH				5e-06
Inflammatory factor	GCST90274799	Interleukin-13 levels	2023		European						https://pubmed.ncbi.nlm.nih.gov/37563310/	37563310	Zhao JH				5e-06
Inflammatory factor	GCST90274800	Interleukin-15 receptor subunit alpha levels	2023		European						https://pubmed.ncbi.nlm.nih.gov/37563310/	37563310	Zhao JH				5e-06
Inflammatory factor	GCST90274801	Interleukin-17A levels	2023		European						https://pubmed.ncbi.nlm.nih.gov/37563310/	37563310	Zhao JH				5e-06
Inflammatory factor	GCST90274802	Interleukin-17C levels	2023		European						https://pubmed.ncbi.nlm.nih.gov/37563310/	37563310	Zhao JH				5e-06
Inflammatory factor	GCST90274803	Interleukin-18 levels	2023		European						https://pubmed.ncbi.nlm.nih.gov/37563310/	37563310	Zhao JH				5e-06
Inflammatory factor	GCST90274804	interleukin-18 receptor 1 levels	2023		European						https://pubmed.ncbi.nlm.nih.gov/37563310/	37563310	Zhao JH				5e-06
Inflammatory factor	GCST90274805	Interleukin-1-alpha levels	2023		European						https://pubmed.ncbi.nlm.nih.gov/37563310/	37563310	Zhao JH				5e-06
Inflammatory factor	GCST90274806	Interleukin-2 levels	2023		European						https://pubmed.ncbi.nlm.nih.gov/37563310/	37563310	Zhao JH				5e-06
Inflammatory factor	GCST90274807	Interleukin-20 levels	2023		European						https://pubmed.ncbi.nlm.nih.gov/37563310/	37563310	Zhao JH				5e-06
