# Supplementary material for: Protective Evidence for Alcohol Consumption in Parkinson’s Disease Risk and Associated Genes of DPP6, SLC39A8, MAD1L1, and RBFOX1
Source: Research Square preprint supplement (doi:10.21203/rs.3.rs-6754726/v1), 2025-05-29
Supplement: Supplementary file 2 [file 24d8579a370ce6e599c29964.docx]

**Supplementary materials**

**Figure S1. MR study design overview**

SNPs: single nucleotide polymorphisms; LD: linkage disequilibrium; IVW: inverse variance weighted; MR-PRESSO: Mendelian randomization pleiotropy residual sum and outlier.

**Table S1. SNPs associated with PD from previous studies**

**Table S2. Clinical data of PD from Tianjin**

**Table S3. Clinical data of PD from Xuzhou**

**Table S4. The GWAS data of exposure and outcome for MR analysis**

GWAS, genome-wide association study.

**Table S5. MR-characterized SNPs**
