# Supplementary material for: Protective Evidence for Alcohol Consumption in Parkinson’s Disease Risk and Associated Genes of DPP6, SLC39A8, MAD1L1, and RBFOX1
Source: Research Square preprint supplement (doi:10.21203/rs.3.rs-6754726/v1), 2025-05-29
Supplement: Supplementary file 3 [file 5ac7f517331d7d6268dd2913.xlsx]

## Sheet: Table S1
Table S1. SNPs associated with PD from previous reports
NO	SNPS	REGION	CHR_ID	CHR_POS	REPORTED GENE(S)	MAPPED_GENE	CONTEXT	P-VALUE	INITIAL SAMPLE SIZE	REPLICATION SAMPLE SIZE	STRONGEST SNP-RISK ALLELE	JOURNAL	DATE	LINK	STUDY
1	rs823128	1q32.1	1	205744250	PARK16, NUCKS1	NUCKS1	intron_variant	7e-08	1,713 European ancestry cases, 3,978 European ancestry controls	3,361 European ancestry cases, 4,573 European ancestry controls	rs823128-A	Nat Genet	2009-11-15	www.ncbi.nlm.nih.gov/pubmed/19915575	Genome-wide association study reveals genetic risk underlying Parkinson's disease.
2	rs823118	1q32.1	1	205754444	RAB7L1, NUCKS1	NUCKS1 - RAB29	intergenic_variant	6e-12	9,619 European ancestry cases, 324,522 European ancestry controls		rs823118-?	Nat Genet	2016-05-16	www.ncbi.nlm.nih.gov/pubmed/27182965	Detection and interpretation of shared genetic influences on 42 human traits.
					NUCKS1, SLC41A1	NUCKS1 - RAB29	intergenic_variant	1e-23	20,184 European ancestry cases, 397,324 European ancestry controls	5,851 European ancestry cases, 5,866 European ancestry controls	rs823118-T	Nat Genet	2017-09-11	www.ncbi.nlm.nih.gov/pubmed/28892059	A meta-analysis of genome-wide association studies identifies 17 new Parkinson's disease risk loci.
					NUCKS1	NUCKS1 - RAB29	intergenic_variant	1e-29	15,056 European ancestry cases, 18,618 European ancestry proxy cases, 449,056 European ancestry controls	22,632 European ancestry cases, 968,735 European ancestry controls	rs823118-T	Lancet Neurol	2019-12-01	www.ncbi.nlm.nih.gov/pubmed/31701892	Identification of novel risk loci, causal insights, and heritable risk for Parkinson's disease: a meta-analysis of genome-wide association studies.
					NUCKS1, RAB7L1	NUCKS1 - RAB29	intergenic_variant	2e-16	13,708 European ancestry cases, 95,282 European ancestry controls	5,353 European ancestry cases, 5,551 European ancestry controls	rs823118-T	Nat Genet	2014-07-27	www.ncbi.nlm.nih.gov/pubmed/25064009	Large-scale meta-analysis of genome-wide association data identifies six new risk loci for Parkinson's disease.
						NUCKS1 - RAB29	intergenic_variant	1e-23	1,972 Chinese ancestry cases, 2,478 Chinese ancestry controls	8,209 Chinese ancestry cases, 9,454 Chinese ancestry controls	rs823118-C	NPJ Parkinsons Dis	2023-02-09	www.ncbi.nlm.nih.gov/pubmed/36759515	Genome-wide association study using whole-genome sequencing identifies risk loci for Parkinson's disease in Chinese population.
3	rs10797576	1q42.2	1	232528865	SIPA1L2	SIPA1L2	intron_variant	2e-07	20,184 European ancestry cases, 397,324 European ancestry controls		rs10797576-T	Biol Psychiatry	2020-02-08	www.ncbi.nlm.nih.gov/pubmed/32201043	Genome-wide Association Analysis of Parkinson's Disease and Schizophrenia Reveals Shared Genetic Architecture and Identifies Novel Risk Loci.
					SIPA1L2	SIPA1L2	intron_variant	8e-13	20,184 European ancestry cases, 397,324 European ancestry controls	5,851 European ancestry cases, 5,866 European ancestry controls	rs10797576-T	Nat Genet	2017-09-11	www.ncbi.nlm.nih.gov/pubmed/28892059	A meta-analysis of genome-wide association studies identifies 17 new Parkinson's disease risk loci.
					SIPA1L2	SIPA1L2	intron_variant	7e-17	15,056 European ancestry cases, 18,618 European ancestry proxy cases, 449,056 European ancestry controls	22,632 European ancestry cases, 968,735 European ancestry controls	rs10797576-T	Lancet Neurol	2019-12-01	www.ncbi.nlm.nih.gov/pubmed/31701892	Identification of novel risk loci, causal insights, and heritable risk for Parkinson's disease: a meta-analysis of genome-wide association studies.
					SIPA1L2	SIPA1L2	intron_variant	5e-10	13,708 European ancestry cases, 95,282 European ancestry controls	5,353 European ancestry cases, 5,551 European ancestry controls	rs10797576-T	Nat Genet	2014-07-27	www.ncbi.nlm.nih.gov/pubmed/25064009	Large-scale meta-analysis of genome-wide association data identifies six new risk loci for Parkinson's disease.
4	rs6430538	2q21.3	2	134782397	CCNT2-AS1	CCNT2-AS1	intron_variant	1e-13	20,184 European ancestry cases, 397,324 European ancestry controls		rs6430538-T	Biol Psychiatry	2020-02-08	www.ncbi.nlm.nih.gov/pubmed/32201043	Genome-wide Association Analysis of Parkinson's Disease and Schizophrenia Reveals Shared Genetic Architecture and Identifies Novel Risk Loci.
					TMEM163, CCNT2	CCNT2-AS1	intron_variant	8e-24	20,184 European ancestry cases, 397,324 European ancestry controls	5,851 European ancestry cases, 5,866 European ancestry controls	rs6430538-C	Nat Genet	2017-09-11	www.ncbi.nlm.nih.gov/pubmed/28892059	A meta-analysis of genome-wide association studies identifies 17 new Parkinson's disease risk loci.
					intergenic	CCNT2-AS1	intron_variant	2e-07	4,238 European ancestry cases, 4,239 European ancestry controls	3,738 European ancestry cases, 2,111 European ancestry controls	rs6430538-?	Ann Neurol	2012-03-01	www.ncbi.nlm.nih.gov/pubmed/22451204	Meta-analysis of Parkinson's disease: identification of a novel locus, RIT2.
					ACMSD, TMEM163	CCNT2-AS1	intron_variant	9e-20	13,708 European ancestry cases, 95,282 European ancestry controls	5,353 European ancestry cases, 5,551 European ancestry controls	rs6430538-C	Nat Genet	2014-07-27	www.ncbi.nlm.nih.gov/pubmed/25064009	Large-scale meta-analysis of genome-wide association data identifies six new risk loci for Parkinson's disease.
5	rs353116	2q24.3	2	165277122	SCN3A	SCN2A	intron_variant	3e-08	20,184 European ancestry cases, 397,324 European ancestry controls	5,851 European ancestry cases, 5,866 European ancestry controls	rs353116-C	Nat Genet	2017-09-11	www.ncbi.nlm.nih.gov/pubmed/28892059	A meta-analysis of genome-wide association studies identifies 17 new Parkinson's disease risk loci.
6	rs10513789	3q27.1	3	183042285	MCCC1, LAMP3	MCCC1	intron_variant	3e-10	3,426 European ancestry cases, 29,624 European ancestry controls		rs10513789-T	PLoS Genet	2011-06-23	www.ncbi.nlm.nih.gov/pubmed/21738487	Web-based genome-wide association study identifies two novel loci and a substantial genetic component for Parkinson's disease.
						MCCC1	intron_variant	6e-50	57,893 European ancestry cases, 1,505,102 European ancestry controls, 7,046 East Asian ancestry cases, 176,756 East Asian ancestry controls, 2,440 Hispanic or Latin American cases, 582,220 Hispanic or Latin American controls, 288 African ancestry cases, 193,985 African ancestry controls		rs10513789-T	Nat Genet	2023-12-28	www.ncbi.nlm.nih.gov/pubmed/38155330	Multi-ancestry genome-wide association meta-analysis of Parkinson's disease.
					MCCC1	MCCC1	intron_variant	1e-34	15,056 European ancestry cases, 18,618 European ancestry proxy cases, 449,056 European ancestry controls	22,632 European ancestry cases, 968,735 European ancestry controls	rs10513789-T	Lancet Neurol	2019-12-01	www.ncbi.nlm.nih.gov/pubmed/31701892	Identification of novel risk loci, causal insights, and heritable risk for Parkinson's disease: a meta-analysis of genome-wide association studies.
						MCCC1	intron_variant	4e-17	1,972 Chinese ancestry cases, 2,478 Chinese ancestry controls	8,209 Chinese ancestry cases, 9,454 Chinese ancestry controls	rs10513789-T	NPJ Parkinsons Dis	2023-02-09	www.ncbi.nlm.nih.gov/pubmed/36759515	Genome-wide association study using whole-genome sequencing identifies risk loci for Parkinson's disease in Chinese population.
7	rs12637471	3q27.1	3	183044649	MCCC1	MCCC1	intron_variant	2e-30	20,184 European ancestry cases, 397,324 European ancestry controls	5,851 European ancestry cases, 5,866 European ancestry controls	rs12637471-G	Nat Genet	2017-09-11	www.ncbi.nlm.nih.gov/pubmed/28892059	A meta-analysis of genome-wide association studies identifies 17 new Parkinson's disease risk loci.
					MCCC1	MCCC1	intron_variant	2e-21	13,708 European ancestry cases, 95,282 European ancestry controls	5,353 European ancestry cases, 5,551 European ancestry controls	rs12637471-G	Nat Genet	2014-07-27	www.ncbi.nlm.nih.gov/pubmed/25064009	Large-scale meta-analysis of genome-wide association data identifies six new risk loci for Parkinson's disease.
8	rs34311866	4p16.3	4	958159	TMEM175	TMEM175	missense_variant	6e-11	5,167 European ancestry cases, 5,366 European ancestry controls		rs34311866-C	Genes (Basel)	2021-05-04	www.ncbi.nlm.nih.gov/pubmed/34064523	Imputation and Reanalysis of ExomeChip Data Identifies Novel, Conditional and Joint Genetic Effects on Parkinson's Disease Risk.
						TMEM175	missense_variant	1e-12	7,099 European ancestry cases, 531,918 European ancestry controls		rs34311866-C	Nat Commun	2024-07-31	www.ncbi.nlm.nih.gov/pubmed/39080267	Proteogenomic network analysis reveals dysregulated mechanisms and potential mediators in Parkinson's disease.
					TMEM175, DGKQ	TMEM175	missense_variant	1e-50	20,184 European ancestry cases, 397,324 European ancestry controls	5,851 European ancestry cases, 5,866 European ancestry controls	rs34311866-C	Nat Genet	2017-09-11	www.ncbi.nlm.nih.gov/pubmed/28892059	A meta-analysis of genome-wide association studies identifies 17 new Parkinson's disease risk loci.
						TMEM175	missense_variant	5e-75	57,893 European ancestry cases, 1,505,102 European ancestry controls, 7,046 East Asian ancestry cases, 176,756 East Asian ancestry controls, 2,440 Hispanic or Latin American cases, 582,220 Hispanic or Latin American controls, 288 African ancestry cases, 193,985 African ancestry controls		rs34311866-T	Nat Genet	2023-12-28	www.ncbi.nlm.nih.gov/pubmed/38155330	Multi-ancestry genome-wide association meta-analysis of Parkinson's disease.
					TMEM175	TMEM175	missense_variant	1e-69	15,056 European ancestry cases, 18,618 European ancestry proxy cases, 449,056 European ancestry controls	22,632 European ancestry cases, 968,735 European ancestry controls	rs34311866-T	Lancet Neurol	2019-12-01	www.ncbi.nlm.nih.gov/pubmed/31701892	Identification of novel risk loci, causal insights, and heritable risk for Parkinson's disease: a meta-analysis of genome-wide association studies.
					TMEM175, GAK, DGKQ	TMEM175	missense_variant	7e-06	6,724 East Asian ancestry cases, 24,851 East Asian ancestry controls	57,545 European ancestry cases, 1,868,816 European ancestry controls, 988 Japanese ancestry cases, 2,521 Japanese ancestry controls	rs34311866-?	JAMA Neurol	2020-04-20	www.ncbi.nlm.nih.gov/pubmed/32310270	Identification of Risk Loci for Parkinson Disease in Asians and Comparison of Risk Between Asians and Europeans: A Genome-Wide Association Study.
					GAK, TMEM175	TMEM175	missense_variant	1e-08	17,996 cases	10,572 cases	rs34311866-C	Mov Disord	2019-04-07	www.ncbi.nlm.nih.gov/pubmed/30957308	Parkinson's disease age at onset genome-wide association study: Defining heritability, genetic loci, and 伪-synuclein mechanisms.
					TMEM175, GAK, DGKQ	TMEM175	missense_variant	1e-43	13,708 European ancestry cases, 95,282 European ancestry controls	5,353 European ancestry cases, 5,551 European ancestry controls	rs34311866-C	Nat Genet	2014-07-27	www.ncbi.nlm.nih.gov/pubmed/25064009	Large-scale meta-analysis of genome-wide association data identifies six new risk loci for Parkinson's disease.
						TMEM175	missense_variant	3e-06	1,972 Chinese ancestry cases, 2,478 Chinese ancestry controls	8,209 Chinese ancestry cases, 9,454 Chinese ancestry controls	rs34311866-C	NPJ Parkinsons Dis	2023-02-09	www.ncbi.nlm.nih.gov/pubmed/36759515	Genome-wide association study using whole-genome sequencing identifies risk loci for Parkinson's disease in Chinese population.
					TMEM175	TMEM175	missense_variant	3e-07	4,639 Spanish ancestry cases, 2,949 Spanish ancestry controls		rs34311866-C	Mov Disord	2019-10-29	www.ncbi.nlm.nih.gov/pubmed/31660654	The Genetic Architecture of Parkinson Disease in Spain: Characterizing Population-Specific Risk, Differential Haplotype Structures, and Providing Etiologic Insight.
9	rs4698412	4p15.32	4	15735725	BST1	BST1	intron_variant	2e-06	1,039 European ancestry cases, 1,984 European ancestry controls	3,232 European ancestry cases, 7,064 European ancestry controls	rs4698412-A	Hum Mol Genet	2010-11-17	www.ncbi.nlm.nih.gov/pubmed/21084426	Genome-wide association study confirms BST1 and suggests a locus on 12q24 as the risk loci for Parkinson's disease in the European population.
					BST1	BST1	intron_variant	3e-07	4,238 European ancestry cases, 4,239 European ancestry controls	3,738 European ancestry cases, 2,111 European ancestry controls	rs4698412-?	Ann Neurol	2012-03-01	www.ncbi.nlm.nih.gov/pubmed/22451204	Meta-analysis of Parkinson's disease: identification of a novel locus, RIT2.
						BST1	intron_variant	6e-33	57,893 European ancestry cases, 1,505,102 European ancestry controls, 7,046 East Asian ancestry cases, 176,756 East Asian ancestry controls, 2,440 Hispanic or Latin American cases, 582,220 Hispanic or Latin American controls, 288 African ancestry cases, 193,985 African ancestry controls		rs4698412-A	Nat Genet	2023-12-28	www.ncbi.nlm.nih.gov/pubmed/38155330	Multi-ancestry genome-wide association meta-analysis of Parkinson's disease.
					BST1	BST1	intron_variant	2e-28	15,056 European ancestry cases, 18,618 European ancestry proxy cases, 449,056 European ancestry controls	22,632 European ancestry cases, 968,735 European ancestry controls	rs4698412-A	Lancet Neurol	2019-12-01	www.ncbi.nlm.nih.gov/pubmed/31701892	Identification of novel risk loci, causal insights, and heritable risk for Parkinson's disease: a meta-analysis of genome-wide association studies.
						BST1	intron_variant	1e-13	1,972 Chinese ancestry cases, 2,478 Chinese ancestry controls	8,209 Chinese ancestry cases, 9,454 Chinese ancestry controls	rs4698412-A	NPJ Parkinsons Dis	2023-02-09	www.ncbi.nlm.nih.gov/pubmed/36759515	Genome-wide association study using whole-genome sequencing identifies risk loci for Parkinson's disease in Chinese population.
10	rs4538475	4p15.32	4	15736314	BST1	BST1	intron_variant	3e-09	988 Japanese ancestry cases, 2,521 Japanese ancestry controls	933 Japanese ancestry cases, 15,753 Japanese ancestry controls	rs4538475-?	Nat Genet	2009-11-15	www.ncbi.nlm.nih.gov/pubmed/19915576	Genome-wide association study identifies common variants at four loci as genetic risk factors for Parkinson's disease.
11	rs6812193	4q21.1	4	76277833	FAM47E	FAM47E, FAM47E-STBD1	intron_variant	7e-11	9,619 European ancestry cases, 324,522 European ancestry controls		rs6812193-?	Nat Genet	2016-05-16	www.ncbi.nlm.nih.gov/pubmed/27182965	Detection and interpretation of shared genetic influences on 42 human traits.
					FAM47E	FAM47E, FAM47E-STBD1	intron_variant	1e-14	20,184 European ancestry cases, 397,324 European ancestry controls	5,851 European ancestry cases, 5,866 European ancestry controls	rs6812193-C	Nat Genet	2017-09-11	www.ncbi.nlm.nih.gov/pubmed/28892059	A meta-analysis of genome-wide association studies identifies 17 new Parkinson's disease risk loci.
					SCARB2	FAM47E, FAM47E-STBD1	intron_variant	8e-10	3,426 European ancestry cases, 29,624 European ancestry controls		rs6812193-C	PLoS Genet	2011-06-23	www.ncbi.nlm.nih.gov/pubmed/21738487	Web-based genome-wide association study identifies two novel loci and a substantial genetic component for Parkinson's disease.
					STBD1	FAM47E, FAM47E-STBD1	intron_variant	4e-07	1,713 European ancestry cases, 3,978 European ancestry controls	3,361 European ancestry cases, 4,573 European ancestry controls	rs6812193-C	Nat Genet	2009-11-15	www.ncbi.nlm.nih.gov/pubmed/19915575	Genome-wide association study reveals genetic risk underlying Parkinson's disease.
					SCARB2, FAM47E	FAM47E, FAM47E-STBD1	intron_variant	3e-11	13,708 European ancestry cases, 95,282 European ancestry controls	5,353 European ancestry cases, 5,551 European ancestry controls	rs6812193-C	Nat Genet	2014-07-27	www.ncbi.nlm.nih.gov/pubmed/25064009	Large-scale meta-analysis of genome-wide association data identifies six new risk loci for Parkinson's disease.
12	rs356219	4q22.1	4	89716450	SNCA	SNCA	intron_variant	2e-47	5,333 European ancestry cases, 12,019 European ancestry controls	7,053 cases, 9,007 controls	rs356219-G	Lancet	2011-02-01	www.ncbi.nlm.nih.gov/pubmed/21292315	Imputation of sequence variants for identification of genetic risks for Parkinson's disease: a meta-analysis of genome-wide association studies.
						SNCA	intron_variant	6e-41	at least 37,688 European ancestry cases, at least 18,618 European ancestry controls		rs356219-?	Cells	2023-01-06	www.ncbi.nlm.nih.gov/pubmed/36672180	A Multi-Trait Association Analysis of Brain Disorders and Platelet Traits Identifies Novel Susceptibility Loci for Major Depression, Alzheimer's and Parkinson's Disease.
					SNCA	SNCA	intron_variant	2e-11	1,588 European ancestry cases, 7,584 European ancestry controls	up to 1,194 European ancestry cases, up to 13,901 European ancestry controls	rs356219-?	Brain	2019-11-22	www.ncbi.nlm.nih.gov/pubmed/31755958	Genetic modifiers of risk and age at onset in GBA associated Parkinson's disease and Lewy body dementia.
					SNCA	SNCA	intron_variant	6e-65	2,197 cases, 2,061 controls	Up to 98,080 European and Asian ancestry individuals	rs356219-?	PLoS Genet	2012-03-15	www.ncbi.nlm.nih.gov/pubmed/22438815	Comprehensive research synopsis and systematic meta-analyses in Parkinson's disease genetics: The PDGene database.
13	rs356220	4q22.1	4	89720189	SNCA	SNCA	intron_variant	2e-19	3,426 European ancestry cases, 29,624 European ancestry controls		rs356220-T	PLoS Genet	2011-06-23	www.ncbi.nlm.nih.gov/pubmed/21738487	Web-based genome-wide association study identifies two novel loci and a substantial genetic component for Parkinson's disease.
					SNCA	SNCA	intron_variant	3e-11	2,000 European ancestry cases, 1,986 European ancestry controls	Up to 1,447 cases, 1,468 controls	rs356220-T	Nat Genet	2010-08-15	www.ncbi.nlm.nih.gov/pubmed/20711177	Common genetic variation in the HLA region is associated with late-onset sporadic Parkinson's disease.
					SNCA	SNCA	intron_variant	1e-09	1,565 European ancestry sproadic Parkinson's disease cases, 435 European ancestry familial Parkinson's disease cases, 1,986 European ancestry controls	1,528 European ancestry sporadic Parkinson's disease cases, 707 European ancestry familial Parkinson's disease cases, 796 European ancestry controls	rs356220-T	BMC Genomics	2014-02-10	www.ncbi.nlm.nih.gov/pubmed/24511991	Identification of a novel Parkinson's disease locus via stratified genome-wide association study.
					SNCA	SNCA	intron_variant	3e-11	1,565 European ancestry sproadic Parkinson's disease cases, 435 European ancestry familial Parkinson's disease cases, 1,986 European ancestry controls	1,528 European ancestry sporadic Parkinson's disease cases, 707 European ancestry familial Parkinson's disease cases, 796 European ancestry controls	rs356220-T	BMC Genomics	2014-02-10	www.ncbi.nlm.nih.gov/pubmed/24511991	Identification of a novel Parkinson's disease locus via stratified genome-wide association study.
					SNCA	SNCA	intron_variant	3e-08	1,039 European ancestry cases, 1,984 European ancestry controls	3,232 European ancestry cases, 7,064 European ancestry controls	rs356220-T	Hum Mol Genet	2010-11-17	www.ncbi.nlm.nih.gov/pubmed/21084426	Genome-wide association study confirms BST1 and suggests a locus on 12q24 as the risk loci for Parkinson's disease in the European population.
					SNCA	SNCA	intron_variant	8e-35	4,238 European ancestry cases, 4,239 European ancestry controls	3,738 European ancestry cases, 2,111 European ancestry controls	rs356220-?	Ann Neurol	2012-03-01	www.ncbi.nlm.nih.gov/pubmed/22451204	Meta-analysis of Parkinson's disease: identification of a novel locus, RIT2.
						SNCA	intron_variant	6e-13	2,638 European ancestry cases, 477,380 European ancestry controls, 340 East Asian ancestry cases, 175,788 East Asian ancestry controls		rs356220-C	Nat Genet	2021-09-30	www.ncbi.nlm.nih.gov/pubmed/34594039	A cross-population atlas of genetic associations for 220 human phenotypes.
					SNCA	SNCA	intron_variant	9e-16	1,705 European ancestry cases, 5,175 European ancestry controls	1,039 European ancestry cases, 1,984 European ancestry controls	rs356220-A	Hum Mol Genet	2010-11-02	www.ncbi.nlm.nih.gov/pubmed/21044948	Dissection of the genetics of Parkinson's disease identifies an additional association 5' of SNCA and multiple associated haplotypes at 17q21.
14	rs2736990	4q22.1	4	89757390	SNCA	SNCA	intron_variant	7e-08	1,752 European ancestry cases, 1,745 European ancestry controls		rs2736990-?	Ann Hum Genet	2010-01-13	www.ncbi.nlm.nih.gov/pubmed/20070850	Genome-wide association study confirms SNPs in SNCA and the MAPT region as common risk factors for Parkinson disease.
					SNCA	SNCA	intron_variant	2e-16	1,713 European ancestry cases, 3,978 European ancestry controls	3,361 European ancestry cases, 4,573 European ancestry controls	rs2736990-C	Nat Genet	2009-11-15	www.ncbi.nlm.nih.gov/pubmed/19915575	Genome-wide association study reveals genetic risk underlying Parkinson's disease.
15	rs6532197	4q22.1	4	89876150	MMRN1	SNCA-AS1 - MMRN1	intergenic_variant	1e-07	1,713 European ancestry cases, 3,978 European ancestry controls	3,361 European ancestry cases, 4,573 European ancestry controls	rs6532197-G	Nat Genet	2009-11-15	www.ncbi.nlm.nih.gov/pubmed/19915575	Genome-wide association study reveals genetic risk underlying Parkinson's disease.
16	rs10464059	5q35.3	5	180367208	NR	GFPT2 - RNU6-525P	intergenic_variant	3e-06	1,752 European ancestry cases, 1,745 European ancestry controls		rs10464059-A	Ann Hum Genet	2010-01-13	www.ncbi.nlm.nih.gov/pubmed/20070850	Genome-wide association study confirms SNPs in SNCA and the MAPT region as common risk factors for Parkinson disease.
17	rs9261484	6p22.1	6	30140906	TRIM40	TRIM40	intron_variant	2e-08	15,056 European ancestry cases, 18,618 European ancestry proxy cases, 449,056 European ancestry controls	22,632 European ancestry cases, 968,735 European ancestry controls	rs9261484-T	Lancet Neurol	2019-12-01	www.ncbi.nlm.nih.gov/pubmed/31701892	Identification of novel risk loci, causal insights, and heritable risk for Parkinson's disease: a meta-analysis of genome-wide association studies.
18	rs9267659	6p21.33	6	31878457	SLC44A4	EHMT2-AS1, SLC44A4	intron_variant	4e-11	15,056 European ancestry cases, 18,618 European ancestry proxy cases, 449,056 European ancestry controls	22,632 European ancestry cases, 968,735 European ancestry controls	rs9267659-A	Lancet Neurol	2019-12-01	www.ncbi.nlm.nih.gov/pubmed/31701892	Identification of novel risk loci, causal insights, and heritable risk for Parkinson's disease: a meta-analysis of genome-wide association studies.
19	rs2280104	8p21.3	8	22668467	SORBS3, PDLIM2, C8orf58, BIN3	BIN3	intron_variant	3e-08	20,184 European ancestry cases, 397,324 European ancestry controls	5,851 European ancestry cases, 5,866 European ancestry controls	rs2280104-T	Nat Genet	2017-09-11	www.ncbi.nlm.nih.gov/pubmed/28892059	A meta-analysis of genome-wide association studies identifies 17 new Parkinson's disease risk loci.
					BIN3	BIN3	intron_variant	1e-08	15,056 European ancestry cases, 18,618 European ancestry proxy cases, 449,056 European ancestry controls	22,632 European ancestry cases, 968,735 European ancestry controls	rs2280104-T	Lancet Neurol	2019-12-01	www.ncbi.nlm.nih.gov/pubmed/31701892	Identification of novel risk loci, causal insights, and heritable risk for Parkinson's disease: a meta-analysis of genome-wide association studies.
20	rs329648	11q25	11	133895472	MIR4697	SPATA19 - IGSF9B	regulatory_region_variant	1e-13	20,184 European ancestry cases, 397,324 European ancestry controls	5,851 European ancestry cases, 5,866 European ancestry controls	rs329648-T	Nat Genet	2017-09-11	www.ncbi.nlm.nih.gov/pubmed/28892059	A meta-analysis of genome-wide association studies identifies 17 new Parkinson's disease risk loci.
					MIR4697	SPATA19 - IGSF9B	regulatory_region_variant	1e-11	13,708 European ancestry cases, 95,282 European ancestry controls	5,353 European ancestry cases, 5,551 European ancestry controls	rs329648-T	Nat Genet	2014-07-27	www.ncbi.nlm.nih.gov/pubmed/25064009	Large-scale meta-analysis of genome-wide association data identifies six new risk loci for Parkinson's disease.
21	rs1994090	12q12	12	40034759	LRRK2	SLC2A13	intron_variant	3e-08	988 Japanese ancestry cases, 2,521 Japanese ancestry controls	933 Japanese ancestry cases, 15,753 Japanese ancestry controls	rs1994090-?	Nat Genet	2009-11-15	www.ncbi.nlm.nih.gov/pubmed/19915576	Genome-wide association study identifies common variants at four loci as genetic risk factors for Parkinson's disease.
22	rs76904798	12q12	12	40220632	LRRK2	LRRK2-DT, LRRK2	intron_variant	1e-19	20,184 European ancestry cases, 397,324 European ancestry controls	5,851 European ancestry cases, 5,866 European ancestry controls	rs76904798-T	Nat Genet	2017-09-11	www.ncbi.nlm.nih.gov/pubmed/28892059	A meta-analysis of genome-wide association studies identifies 17 new Parkinson's disease risk loci.
					LRRK2	LRRK2-DT, LRRK2	intron_variant	2e-28	15,056 European ancestry cases, 18,618 European ancestry proxy cases, 449,056 European ancestry controls	22,632 European ancestry cases, 968,735 European ancestry controls	rs76904798-T	Lancet Neurol	2019-12-01	www.ncbi.nlm.nih.gov/pubmed/31701892	Identification of novel risk loci, causal insights, and heritable risk for Parkinson's disease: a meta-analysis of genome-wide association studies.
					LRRK2	LRRK2-DT, LRRK2	intron_variant	5e-14	13,708 European ancestry cases, 95,282 European ancestry controls	5,353 European ancestry cases, 5,551 European ancestry controls	rs76904798-T	Nat Genet	2014-07-27	www.ncbi.nlm.nih.gov/pubmed/25064009	Large-scale meta-analysis of genome-wide association data identifies six new risk loci for Parkinson's disease.
23	rs34637584	12q12	12	40340400		LRRK2	missense_variant	7e-12	7,099 European ancestry cases, 531,918 European ancestry controls		rs34637584-A	Nat Commun	2024-07-31	www.ncbi.nlm.nih.gov/pubmed/39080267	Proteogenomic network analysis reveals dysregulated mechanisms and potential mediators in Parkinson's disease.
					LRRK2	LRRK2	missense_variant	2e-28	3,426 European ancestry cases, 29,624 European ancestry controls		rs34637584-A	PLoS Genet	2011-06-23	www.ncbi.nlm.nih.gov/pubmed/21738487	Web-based genome-wide association study identifies two novel loci and a substantial genetic component for Parkinson's disease.
					LRRK2	LRRK2	missense_variant	4e-148	15,056 European ancestry cases, 18,618 European ancestry proxy cases, 449,056 European ancestry controls	22,632 European ancestry cases, 968,735 European ancestry controls	rs34637584-A	Lancet Neurol	2019-12-01	www.ncbi.nlm.nih.gov/pubmed/31701892	Identification of novel risk loci, causal insights, and heritable risk for Parkinson's disease: a meta-analysis of genome-wide association studies.
24	rs34778348	12q12	12	40363526		LRRK2	missense_variant	5e-13	1,050 East Asian ancestry cases, 5,000 East Asian ancestry controls		rs34778348-A	NPJ Parkinsons Dis	2023-10-07	www.ncbi.nlm.nih.gov/pubmed/37805635	Ethnicity- and sex-specific genome wide association study on Parkinson's disease.
						LRRK2	missense_variant	2e-09	554 East Asian ancestry female cases, 2,610 East Asian ancestry female controls		rs34778348-A	NPJ Parkinsons Dis	2023-10-07	www.ncbi.nlm.nih.gov/pubmed/37805635	Ethnicity- and sex-specific genome wide association study on Parkinson's disease.
					LRRK2	LRRK2	missense_variant	3e-21	2,197 cases, 2,061 controls	Up to 98,080 European and Asian ancestry individuals	rs34778348-?	PLoS Genet	2012-03-15	www.ncbi.nlm.nih.gov/pubmed/22438815	Comprehensive research synopsis and systematic meta-analyses in Parkinson's disease genetics: The PDGene database.
						LRRK2	missense_variant	3e-30	1,972 Chinese ancestry cases, 2,478 Chinese ancestry controls	8,209 Chinese ancestry cases, 9,454 Chinese ancestry controls	rs34778348-C	NPJ Parkinsons Dis	2023-02-09	www.ncbi.nlm.nih.gov/pubmed/36759515	Genome-wide association study using whole-genome sequencing identifies risk loci for Parkinson's disease in Chinese population.
25	rs11060180	12q24.31	12	122819039	CCDC62	CCDC62	intron_variant	3e-10	9,619 European ancestry cases, 324,522 European ancestry controls		rs11060180-?	Nat Genet	2016-05-16	www.ncbi.nlm.nih.gov/pubmed/27182965	Detection and interpretation of shared genetic influences on 42 human traits.
					OGFOD2	CCDC62	intron_variant	2e-20	20,184 European ancestry cases, 397,324 European ancestry controls	5,851 European ancestry cases, 5,866 European ancestry controls	rs11060180-A	Nat Genet	2017-09-11	www.ncbi.nlm.nih.gov/pubmed/28892059	A meta-analysis of genome-wide association studies identifies 17 new Parkinson's disease risk loci.
					CCDC62	CCDC62	intron_variant	6e-12	13,708 European ancestry cases, 95,282 European ancestry controls	5,353 European ancestry cases, 5,551 European ancestry controls	rs11060180-A	Nat Genet	2014-07-27	www.ncbi.nlm.nih.gov/pubmed/25064009	Large-scale meta-analysis of genome-wide association data identifies six new risk loci for Parkinson's disease.
26	rs10847864	12q24.31	12	122842051		HIP1R	intron_variant	2e-41	57,893 European ancestry cases, 1,505,102 European ancestry controls, 7,046 East Asian ancestry cases, 176,756 East Asian ancestry controls, 2,440 Hispanic or Latin American cases, 582,220 Hispanic or Latin American controls, 288 African ancestry cases, 193,985 African ancestry controls		rs10847864-T	Nat Genet	2023-12-28	www.ncbi.nlm.nih.gov/pubmed/38155330	Multi-ancestry genome-wide association meta-analysis of Parkinson's disease.
					HIP1R	HIP1R	intron_variant	1e-37	15,056 European ancestry cases, 18,618 European ancestry proxy cases, 449,056 European ancestry controls	22,632 European ancestry cases, 968,735 European ancestry controls	rs10847864-T	Lancet Neurol	2019-12-01	www.ncbi.nlm.nih.gov/pubmed/31701892	Identification of novel risk loci, causal insights, and heritable risk for Parkinson's disease: a meta-analysis of genome-wide association studies.
						HIP1R	intron_variant	4e-07	1,972 Chinese ancestry cases, 2,478 Chinese ancestry controls	8,209 Chinese ancestry cases, 9,454 Chinese ancestry controls	rs10847864-G	NPJ Parkinsons Dis	2023-02-09	www.ncbi.nlm.nih.gov/pubmed/36759515	Genome-wide association study using whole-genome sequencing identifies risk loci for Parkinson's disease in Chinese population.
27	rs11610045	12q24.33	12	132487182		GALNT9 - FBRSL1	intergenic_variant	5e-11	57,893 European ancestry cases, 1,505,102 European ancestry controls, 7,046 East Asian ancestry cases, 176,756 East Asian ancestry controls, 2,440 Hispanic or Latin American cases, 582,220 Hispanic or Latin American controls, 288 African ancestry cases, 193,985 African ancestry controls		rs11610045-A	Nat Genet	2023-12-28	www.ncbi.nlm.nih.gov/pubmed/38155330	Multi-ancestry genome-wide association meta-analysis of Parkinson's disease.
					FBRSL1	GALNT9 - FBRSL1	intergenic_variant	2e-10	15,056 European ancestry cases, 18,618 European ancestry proxy cases, 449,056 European ancestry controls	22,632 European ancestry cases, 968,735 European ancestry controls	rs11610045-A	Lancet Neurol	2019-12-01	www.ncbi.nlm.nih.gov/pubmed/31701892	Identification of novel risk loci, causal insights, and heritable risk for Parkinson's disease: a meta-analysis of genome-wide association studies.
28	rs12431733	14q22.2	14	53824112	BMP4	LINC02331	intron_variant	3e-06	1,713 European ancestry cases, 3,978 European ancestry controls	3,361 European ancestry cases, 4,573 European ancestry controls	rs12431733-T	Nat Genet	2009-11-15	www.ncbi.nlm.nih.gov/pubmed/19915575	Genome-wide association study reveals genetic risk underlying Parkinson's disease.
29	rs11158026	14q22.2	14	54882151	GCH1	GCH1	intron_variant	9e-15	9,619 European ancestry cases, 324,522 European ancestry controls		rs11158026-?	Nat Genet	2016-05-16	www.ncbi.nlm.nih.gov/pubmed/27182965	Detection and interpretation of shared genetic influences on 42 human traits.
						GCH1	intron_variant	3e-08	7,099 European ancestry cases, 531,918 European ancestry controls		rs11158026-T	Nat Commun	2024-07-31	www.ncbi.nlm.nih.gov/pubmed/39080267	Proteogenomic network analysis reveals dysregulated mechanisms and potential mediators in Parkinson's disease.
					GCH1	GCH1	intron_variant	1e-10	20,184 European ancestry cases, 397,324 European ancestry controls		rs11158026-T	Biol Psychiatry	2020-02-08	www.ncbi.nlm.nih.gov/pubmed/32201043	Genome-wide Association Analysis of Parkinson's Disease and Schizophrenia Reveals Shared Genetic Architecture and Identifies Novel Risk Loci.
					GCH1	GCH1	intron_variant	4e-16	20,184 European ancestry cases, 397,324 European ancestry controls	5,851 European ancestry cases, 5,866 European ancestry controls	rs11158026-C	Nat Genet	2017-09-11	www.ncbi.nlm.nih.gov/pubmed/28892059	A meta-analysis of genome-wide association studies identifies 17 new Parkinson's disease risk loci.
						GCH1	intron_variant	3e-16	57,893 European ancestry cases, 1,505,102 European ancestry controls, 7,046 East Asian ancestry cases, 176,756 East Asian ancestry controls, 2,440 Hispanic or Latin American cases, 582,220 Hispanic or Latin American controls, 288 African ancestry cases, 193,985 African ancestry controls		rs11158026-T	Nat Genet	2023-12-28	www.ncbi.nlm.nih.gov/pubmed/38155330	Multi-ancestry genome-wide association meta-analysis of Parkinson's disease.
					GCH1	GCH1	intron_variant	2e-16	15,056 European ancestry cases, 18,618 European ancestry proxy cases, 449,056 European ancestry controls	22,632 European ancestry cases, 968,735 European ancestry controls	rs11158026-T	Lancet Neurol	2019-12-01	www.ncbi.nlm.nih.gov/pubmed/31701892	Identification of novel risk loci, causal insights, and heritable risk for Parkinson's disease: a meta-analysis of genome-wide association studies.
					GCH1	GCH1	intron_variant	6e-11	13,708 European ancestry cases, 95,282 European ancestry controls	5,353 European ancestry cases, 5,551 European ancestry controls	rs11158026-C	Nat Genet	2014-07-27	www.ncbi.nlm.nih.gov/pubmed/25064009	Large-scale meta-analysis of genome-wide association data identifies six new risk loci for Parkinson's disease.
						GCH1	intron_variant	2e-09	1,972 Chinese ancestry cases, 2,478 Chinese ancestry controls	8,209 Chinese ancestry cases, 9,454 Chinese ancestry controls	rs11158026-C	NPJ Parkinsons Dis	2023-02-09	www.ncbi.nlm.nih.gov/pubmed/36759515	Genome-wide association study using whole-genome sequencing identifies risk loci for Parkinson's disease in Chinese population.
30	rs4784227	16q12.1	16	52565276	TOX3	CASC16	intron_variant	1e-10	20,184 European ancestry cases, 397,324 European ancestry controls	5,851 European ancestry cases, 5,866 European ancestry controls	rs4784227-T	Nat Genet	2017-09-11	www.ncbi.nlm.nih.gov/pubmed/28892059	A meta-analysis of genome-wide association studies identifies 17 new Parkinson's disease risk loci.
31	rs11868035	17p11.2	17	17811787	SREBF1, RAI1	SREBF1	splice_region_variant	6e-08	3,426 European ancestry cases, 29,624 European ancestry controls		rs11868035-G	PLoS Genet	2011-06-23	www.ncbi.nlm.nih.gov/pubmed/21738487	Web-based genome-wide association study identifies two novel loci and a substantial genetic component for Parkinson's disease.
32	rs393152	17q21.31	17	45641777	MAPT, C17orf69, KIAA1267, LOC644246	LINC02210, LINC02210, LINC02210-CRHR1	non_coding_transcript_exon_variant	2e-16	1,713 European ancestry cases, 3,978 European ancestry controls	3,361 European ancestry cases, 4,573 European ancestry controls	rs393152-A	Nat Genet	2009-11-15	www.ncbi.nlm.nih.gov/pubmed/19915575	Genome-wide association study reveals genetic risk underlying Parkinson's disease.
33	rs12456492	18q12.3	18	43093415	RIT2	RIT2	intron_variant	2e-09	20,184 European ancestry cases, 397,324 European ancestry controls		rs12456492-A	Biol Psychiatry	2020-02-08	www.ncbi.nlm.nih.gov/pubmed/32201043	Genome-wide Association Analysis of Parkinson's Disease and Schizophrenia Reveals Shared Genetic Architecture and Identifies Novel Risk Loci.
					SYT4	RIT2	intron_variant	6e-16	20,184 European ancestry cases, 397,324 European ancestry controls	5,851 European ancestry cases, 5,866 European ancestry controls	rs12456492-G	Nat Genet	2017-09-11	www.ncbi.nlm.nih.gov/pubmed/28892059	A meta-analysis of genome-wide association studies identifies 17 new Parkinson's disease risk loci.
					RIT2	RIT2	intron_variant	2e-10	4,238 European ancestry cases, 4,239 European ancestry controls	3,738 European ancestry cases, 2,111 European ancestry controls	rs12456492-?	Ann Neurol	2012-03-01	www.ncbi.nlm.nih.gov/pubmed/22451204	Meta-analysis of Parkinson's disease: identification of a novel locus, RIT2.
					RIT2	RIT2	intron_variant	4e-23	15,056 European ancestry cases, 18,618 European ancestry proxy cases, 449,056 European ancestry controls	22,632 European ancestry cases, 968,735 European ancestry controls	rs12456492-A	Lancet Neurol	2019-12-01	www.ncbi.nlm.nih.gov/pubmed/31701892	Identification of novel risk loci, causal insights, and heritable risk for Parkinson's disease: a meta-analysis of genome-wide association studies.
					RIT2	RIT2	intron_variant	8e-12	13,708 European ancestry cases, 95,282 European ancestry controls	5,353 European ancestry cases, 5,551 European ancestry controls	rs12456492-G	Nat Genet	2014-07-27	www.ncbi.nlm.nih.gov/pubmed/25064009	Large-scale meta-analysis of genome-wide association data identifies six new risk loci for Parkinson's disease.
						RIT2	intron_variant	2e-07	1,972 Chinese ancestry cases, 2,478 Chinese ancestry controls	8,209 Chinese ancestry cases, 9,454 Chinese ancestry controls	rs12456492-G	NPJ Parkinsons Dis	2023-02-09	www.ncbi.nlm.nih.gov/pubmed/36759515	Genome-wide association study using whole-genome sequencing identifies risk loci for Parkinson's disease in Chinese population.
34	rs2295545	20p13	20	3184040	DDRGK1	LZTS3 - DDRGK1	intergenic_variant	8e-11	15,056 European ancestry cases, 18,618 European ancestry proxy cases, 449,056 European ancestry controls	22,632 European ancestry cases, 968,735 European ancestry controls	rs2295545-T	Lancet Neurol	2019-12-01	www.ncbi.nlm.nih.gov/pubmed/31701892	Identification of novel risk loci, causal insights, and heritable risk for Parkinson's disease: a meta-analysis of genome-wide association studies.
35	rs1223271	20p12.1	20	13316265	C20orf82	ISM1 - TASP1	intergenic_variant	5e-06	1,713 European ancestry cases, 3,978 European ancestry controls	3,361 European ancestry cases, 4,573 European ancestry controls	rs1223271-G	Nat Genet	2009-11-15	www.ncbi.nlm.nih.gov/pubmed/19915575	Genome-wide association study reveals genetic risk underlying Parkinson's disease.
