# Supplementary material for: Protective Evidence for Alcohol Consumption in Parkinson’s Disease Risk and Associated Genes of DPP6, SLC39A8, MAD1L1, and RBFOX1
Source: Research Square preprint supplement (doi:10.21203/rs.3.rs-6754726/v1), 2025-05-29
Supplement: Supplementary file 4 [file 63d4086834aed9aabb4a5d09.xlsx]

## Sheet: Alcohol, tea or coffee on PD
The information of the SNPs used as IVs for alcohol, tea or coffee.
exposure	NO	SNP	effect_allele.exposure	other_allele.exposure	effect_allele.outcome	other_allele.outcome	beta.exposure	beta.outcome	eaf.exposure	eaf.outcome	remove	palindromic	ambiguous	id.outcome	chr	pos	se.outcome	samplesize.outcome	pval.outcome	outcome	originalname.outcome	outcome.deprecated	mr_keep.outcome	data_source.outcome	pos.exposure	pval.exposure	se.exposure	chr.exposure	samplesize.exposure	id.exposure	exposure	mr_keep.exposure	pval_origin.exposure	data_source.exposure	action	SNP_index	mr_keep	R2	F
Alcohol consumption || id:ieu-a-1283	1	rs11940694	G	A	G	A	0.02694	0.0004	0.6063	0.594	FALSE	FALSE	FALSE	ieu-b-7	4	39414993	0.0203	482730	0.9849	Parkinson's disease || id:ieu-b-7	Parkinson's disease	Parkinson's disease || ||	TRUE	igd	39414993	8.42946e-19	0.003042	4	107311	ieu-a-1283	Alcohol consumption || id:ieu-a-1283	TRUE	reported	igd	2	1	TRUE	0.000730323	78.4276
Alcohol consumption || id:ieu-a-1283	2	rs1260326	C	T	C	T	0.02839	0.0678	0.6066	0.5801	FALSE	FALSE	FALSE	ieu-b-7	2	27730940	0.0172	482730	8.23797e-05	Parkinson's disease || id:ieu-b-7	Parkinson's disease	Parkinson's disease || ||	TRUE	igd	27730940	1.34091e-21	0.002973	2	112176	ieu-a-1283	Alcohol consumption || id:ieu-a-1283	TRUE	reported	igd	2	1	TRUE	0.000812247	91.1871
Alcohol consumption || id:ieu-a-1283	3	rs145452708	C	G	C	G	-0.03427	0.0198	0.009985	0.0318	FALSE	TRUE	FALSE	ieu-b-7	4	100248642	0.0598	481851	0.74	Parkinson's disease || id:ieu-b-7	Parkinson's disease	Parkinson's disease || ||	TRUE	igd	100248642	1.14789e-30	0.002976	4	112071	ieu-a-1283	Alcohol consumption || id:ieu-a-1283	TRUE	reported	igd	2	1	TRUE	0.00118183	132.603
Alcohol consumption || id:ieu-a-1283	4	rs9841829	G	T	G	T	0.01869	0.0411	0.2269	0.24	FALSE	FALSE	FALSE	ieu-b-7	3	85569361	0.0223	482730	0.0651103	Parkinson's disease || id:ieu-b-7	Parkinson's disease	Parkinson's disease || ||	TRUE	igd	85569361	3.359e-10	0.002976	3	111977	ieu-a-1283	Alcohol consumption || id:ieu-a-1283	TRUE	reported	igd	2	1	TRUE	0.000352104	39.4407
Alcohol intake frequency. || id:ukb-b-5779	1	rs10188314	T	C	T	C	-0.0197869	0.0112	0.470852	0.4695	FALSE	FALSE	FALSE	ieu-b-7	2	215402926	0.0223	468692	0.6175	Parkinson's disease || id:ieu-b-7	Parkinson's disease	Parkinson's disease || ||	TRUE	igd	215402926	7.19946e-11	0.00303605	2	462346	ukb-b-5779	Alcohol intake frequency. || id:ukb-b-5779	TRUE	reported	igd	2	1	TRUE	9.18609e-05	42.4752
Alcohol intake frequency. || id:ukb-b-5779	2	rs10792669	G	A	G	A	0.0174322	-0.0087	0.505254	0.5006	FALSE	FALSE	FALSE	ieu-b-7	11	82688356	0.0177	482730	0.625299	Parkinson's disease || id:ieu-b-7	Parkinson's disease	Parkinson's disease || ||	TRUE	igd	82688356	9.90011e-09	0.00304065	11	462346	ukb-b-5779	Alcohol intake frequency. || id:ukb-b-5779	TRUE	reported	igd	2	1	TRUE	7.10843e-05	32.8677
Alcohol intake frequency. || id:ukb-b-5779	3	rs11039429	T	C	T	C	-0.0235595	-0.0159	0.454624	0.4632	FALSE	FALSE	FALSE	ieu-b-7	11	47867059	0.0172	482730	0.3576	Parkinson's disease || id:ieu-b-7	Parkinson's disease	Parkinson's disease || ||	TRUE	igd	47867059	8.69961e-15	0.00303737	11	462346	ukb-b-5779	Alcohol intake frequency. || id:ukb-b-5779	TRUE	reported	igd	2	1	TRUE	0.000130111	60.1637
Alcohol intake frequency. || id:ukb-b-5779	4	rs11223617	A	G	A	G	0.0250908	-0.0255	0.206155	0.2094	FALSE	FALSE	FALSE	ieu-b-7	11	133780757	0.021	482730	0.2256	Parkinson's disease || id:ieu-b-7	Parkinson's disease	Parkinson's disease || ||	TRUE	igd	133780757	2.29985e-11	0.00375381	11	462346	ukb-b-5779	Alcohol intake frequency. || id:ukb-b-5779	TRUE	reported	igd	2	1	TRUE	9.66219e-05	44.6769
Alcohol intake frequency. || id:ukb-b-5779	5	rs11700855	G	A	G	A	-0.029795	0.0131	0.093465	0.0898	FALSE	FALSE	FALSE	ieu-b-7	21	34270051	0.0395	468692	0.7392	Parkinson's disease || id:ieu-b-7	Parkinson's disease	Parkinson's disease || ||	TRUE	igd	34270051	1.2e-08	0.00523292	21	462346	ukb-b-5779	Alcohol intake frequency. || id:ukb-b-5779	TRUE	reported	igd	2	1	TRUE	7.01134e-05	32.4188
Alcohol intake frequency. || id:ukb-b-5779	6	rs11750777	A	G	A	G	-0.020493	-0.019	0.209454	0.2022	FALSE	FALSE	FALSE	ieu-b-7	5	166830787	0.0281	468692	0.4986	Parkinson's disease || id:ieu-b-7	Parkinson's disease	Parkinson's disease || ||	TRUE	igd	166830787	3.79997e-08	0.00372613	5	462346	ukb-b-5779	Alcohol intake frequency. || id:ukb-b-5779	TRUE	reported	igd	2	1	TRUE	6.54183e-05	30.2478
Alcohol intake frequency. || id:ukb-b-5779	7	rs11787216	T	C	T	C	0.0244162	-0.0016	0.369127	0.3642	FALSE	FALSE	FALSE	ieu-b-7	8	142615222	0.0278	13655	0.9536	Parkinson's disease || id:ieu-b-7	Parkinson's disease	Parkinson's disease || ||	TRUE	igd	142615222	2.39994e-14	0.00320078	8	462346	ukb-b-5779	Alcohol intake frequency. || id:ukb-b-5779	TRUE	reported	igd	2	1	TRUE	0.000125841	58.1892
Alcohol intake frequency. || id:ukb-b-5779	8	rs11940694	G	A	G	A	-0.0437138	0.0004	0.604193	0.594	FALSE	FALSE	FALSE	ieu-b-7	4	39414993	0.0203	482730	0.9849	Parkinson's disease || id:ieu-b-7	Parkinson's disease	Parkinson's disease || ||	TRUE	igd	39414993	1e-44	0.00311609	4	462346	ukb-b-5779	Alcohol intake frequency. || id:ukb-b-5779	TRUE	reported	igd	2	1	TRUE	0.000425466	196.796
Alcohol intake frequency. || id:ukb-b-5779	9	rs12153855	C	T	C	T	0.0294435	0.0495	0.10497	0.1066	FALSE	FALSE	FALSE	ieu-b-7	6	32074804	0.0307	480593	0.1069	Parkinson's disease || id:ieu-b-7	Parkinson's disease	Parkinson's disease || ||	TRUE	igd	32074804	2.39999e-09	0.00493484	6	462346	ukb-b-5779	Alcohol intake frequency. || id:ukb-b-5779	TRUE	reported	igd	2	1	TRUE	7.69896e-05	35.5984
Alcohol intake frequency. || id:ukb-b-5779	10	rs1228589	A	G	A	G	0.0210699	0.0185	0.246133	0.2356	FALSE	FALSE	FALSE	ieu-b-7	3	131634826	0.0228	482730	0.418	Parkinson's disease || id:ieu-b-7	Parkinson's disease	Parkinson's disease || ||	TRUE	igd	131634826	2.30001e-09	0.00352806	3	462346	ukb-b-5779	Alcohol intake frequency. || id:ukb-b-5779	TRUE	reported	igd	2	1	TRUE	7.71352e-05	35.6657
Alcohol intake frequency. || id:ukb-b-5779	11	rs1229984	C	T	C	T	-0.261708	-0.0851	0.97277	0.937	FALSE	FALSE	FALSE	ieu-b-7	4	100239319	0.0453	482730	0.0605299	Parkinson's disease || id:ieu-b-7	Parkinson's disease	Parkinson's disease || ||	TRUE	igd	100239319	1.39959e-178	0.00918496	4	462346	ukb-b-5779	Alcohol intake frequency. || id:ukb-b-5779	TRUE	reported	igd	2	1	TRUE	0.00175287	811.853
Alcohol intake frequency. || id:ukb-b-5779	12	rs12312693	C	T	C	T	-0.0176811	0.0194	0.451772	0.425	FALSE	FALSE	FALSE	ieu-b-7	12	57511734	0.0173	482730	0.2639	Parkinson's disease || id:ieu-b-7	Parkinson's disease	Parkinson's disease || ||	TRUE	igd	57511734	6.80002e-09	0.00305026	12	462346	ukb-b-5779	Alcohol intake frequency. || id:ukb-b-5779	TRUE	reported	igd	2	1	TRUE	7.26685e-05	33.6003
Alcohol intake frequency. || id:ukb-b-5779	13	rs13102973	C	T	C	T	-0.0194072	-0.0254	0.61881	0.6166	FALSE	FALSE	FALSE	ieu-b-7	4	135900688	0.0228	468692	0.2652	Parkinson's disease || id:ieu-b-7	Parkinson's disease	Parkinson's disease || ||	TRUE	igd	135900688	4.90004e-10	0.00311875	4	462346	ukb-b-5779	Alcohol intake frequency. || id:ukb-b-5779	TRUE	reported	igd	2	1	TRUE	8.37454e-05	38.7224
Alcohol intake frequency. || id:ukb-b-5779	14	rs13135092	G	A	G	A	0.0438341	-0.0301	0.083483	0.0828	FALSE	FALSE	FALSE	ieu-b-7	4	103198082	0.0315	482730	0.3395	Parkinson's disease || id:ieu-b-7	Parkinson's disease	Parkinson's disease || ||	TRUE	igd	103198082	1.59993e-15	0.00549884	4	462346	ukb-b-5779	Alcohol intake frequency. || id:ukb-b-5779	TRUE	reported	igd	2	1	TRUE	0.000137422	63.5448
Alcohol intake frequency. || id:ukb-b-5779	15	rs13178443	T	C	T	C	-0.0186516	-0.0073	0.276349	0.2695	FALSE	FALSE	FALSE	ieu-b-7	5	145615275	0.0194	482730	0.7067	Parkinson's disease || id:ieu-b-7	Parkinson's disease	Parkinson's disease || ||	TRUE	igd	145615275	3.79997e-08	0.00338983	5	462346	ukb-b-5779	Alcohol intake frequency. || id:ukb-b-5779	TRUE	reported	igd	2	1	TRUE	6.54758e-05	30.2743
Alcohol intake frequency. || id:ukb-b-5779	16	rs13390019	C	T	C	T	0.0296116	-0.0146	0.134041	0.1429	FALSE	FALSE	FALSE	ieu-b-7	2	97797680	0.026	482730	0.5758	Parkinson's disease || id:ieu-b-7	Parkinson's disease	Parkinson's disease || ||	TRUE	igd	97797680	4.30031e-11	0.00449182	2	462346	ukb-b-5779	Alcohol intake frequency. || id:ukb-b-5779	TRUE	reported	igd	2	1	TRUE	9.39877e-05	43.4587
Alcohol intake frequency. || id:ukb-b-5779	17	rs1421085	C	T	C	T	0.0199392	-0.0043	0.403447	0.4159	FALSE	FALSE	FALSE	ieu-b-7	16	53800954	0.0171	482730	0.8017	Parkinson's disease || id:ieu-b-7	Parkinson's disease	Parkinson's disease || ||	TRUE	igd	53800954	1e-10	0.00308481	16	462346	ukb-b-5779	Alcohol intake frequency. || id:ukb-b-5779	TRUE	reported	igd	2	1	TRUE	9.0355e-05	41.7789
Alcohol intake frequency. || id:ukb-b-5779	18	rs1515591	G	T	G	T	0.0182303	0.0484	0.383186	0.3879	FALSE	FALSE	FALSE	ieu-b-7	3	174215120	0.0228	468692	0.0337598	Parkinson's disease || id:ieu-b-7	Parkinson's disease	Parkinson's disease || ||	TRUE	igd	174213976	4.90004e-09	0.00311635	3	462346	ukb-b-5779	Alcohol intake frequency. || id:ukb-b-5779	TRUE	reported	igd	2	1	TRUE	7.40109e-05	34.221
Alcohol intake frequency. || id:ukb-b-5779	19	rs1666658	C	T	C	T	0.0179674	0.0105	0.392206	0.4022	FALSE	FALSE	FALSE	ieu-b-7	11	121801129	0.0228	468692	0.6445	Parkinson's disease || id:ieu-b-7	Parkinson's disease	Parkinson's disease || ||	TRUE	igd	121801129	6.69993e-09	0.00309866	11	462346	ukb-b-5779	Alcohol intake frequency. || id:ukb-b-5779	TRUE	reported	igd	2	1	TRUE	7.2715e-05	33.6218
Alcohol intake frequency. || id:ukb-b-5779	20	rs17662759	C	T	C	T	0.0301348	0.0657	0.089115	0.0907	FALSE	FALSE	FALSE	ieu-b-7	2	193989223	0.0436	468692	0.1318	Parkinson's disease || id:ieu-b-7	Parkinson's disease	Parkinson's disease || ||	TRUE	igd	193989223	3.40001e-08	0.00546031	2	462346	ukb-b-5779	Alcohol intake frequency. || id:ukb-b-5779	TRUE	reported	igd	2	1	TRUE	6.58728e-05	30.4579
Alcohol intake frequency. || id:ukb-b-5779	21	rs17690703	T	C	T	C	0.0250342	-0.2151	0.262687	0.2524	FALSE	FALSE	FALSE	ieu-b-7	17	43925297	0.0244	480593	1.23112e-18	Parkinson's disease || id:ieu-b-7	Parkinson's disease	Parkinson's disease || ||	TRUE	igd	43925297	2.90001e-13	0.00343021	17	462346	ukb-b-5779	Alcohol intake frequency. || id:ukb-b-5779	TRUE	reported	igd	2	1	TRUE	0.000115188	53.2628
Alcohol intake frequency. || id:ukb-b-5779	22	rs186347	T	G	T	G	0.0179489	0.0134	0.463343	0.4776	FALSE	FALSE	FALSE	ieu-b-7	14	59072226	0.0177	482730	0.4495	Parkinson's disease || id:ieu-b-7	Parkinson's disease	Parkinson's disease || ||	TRUE	igd	59072226	4e-09	0.00305071	14	462346	ukb-b-5779	Alcohol intake frequency. || id:ukb-b-5779	TRUE	reported	igd	2	1	TRUE	7.48642e-05	34.6156
Alcohol intake frequency. || id:ukb-b-5779	23	rs1937522	G	A	G	A	0.0168979	-0.0013	0.528054	0.529	FALSE	FALSE	FALSE	ieu-b-7	13	68080817	0.0222	468692	0.9545	Parkinson's disease || id:ieu-b-7	Parkinson's disease	Parkinson's disease || ||	TRUE	igd	68080817	2.5e-08	0.00303207	13	462346	ukb-b-5779	Alcohol intake frequency. || id:ukb-b-5779	TRUE	reported	igd	2	1	TRUE	6.71724e-05	31.0588
Alcohol intake frequency. || id:ukb-b-5779	24	rs1991083	T	C	T	C	-0.0223925	0.0565	0.679886	0.6843	FALSE	FALSE	FALSE	ieu-b-7	2	23887437	0.0207	482730	0.00628507	Parkinson's disease || id:ieu-b-7	Parkinson's disease	Parkinson's disease || ||	TRUE	igd	23887437	6.29941e-12	0.00325813	2	462346	ukb-b-5779	Alcohol intake frequency. || id:ukb-b-5779	TRUE	reported	igd	2	1	TRUE	0.000102154	47.2353
Alcohol intake frequency. || id:ukb-b-5779	25	rs2043677	T	C	T	C	0.0261133	-0.0328	0.145599	0.1499	FALSE	FALSE	FALSE	ieu-b-7	18	38313195	0.0311	469486	0.2929	Parkinson's disease || id:ieu-b-7	Parkinson's disease	Parkinson's disease || ||	TRUE	igd	38313195	1.6e-09	0.0043272	18	462346	ukb-b-5779	Alcohol intake frequency. || id:ukb-b-5779	TRUE	reported	igd	2	1	TRUE	7.87605e-05	36.4173
Alcohol intake frequency. || id:ukb-b-5779	26	rs2159935	A	G	A	G	-0.0185742	-0.0543	0.490369	0.4858	FALSE	FALSE	FALSE	ieu-b-7	4	55521017	0.0221	468692	0.0141899	Parkinson's disease || id:ieu-b-7	Parkinson's disease	Parkinson's disease || ||	TRUE	igd	55521017	8.30004e-10	0.00302582	4	462346	ukb-b-5779	Alcohol intake frequency. || id:ukb-b-5779	TRUE	reported	igd	2	1	TRUE	8.14951e-05	37.6818
Alcohol intake frequency. || id:ukb-b-5779	27	rs2160935	T	C	T	C	-0.018718	-0.005	0.604293	0.6114	FALSE	FALSE	FALSE	ieu-b-7	8	30840651	0.02	482730	0.8038	Parkinson's disease || id:ieu-b-7	Parkinson's disease	Parkinson's disease || ||	TRUE	igd	30840651	1.40001e-09	0.00309117	8	462346	ukb-b-5779	Alcohol intake frequency. || id:ukb-b-5779	TRUE	reported	igd	2	1	TRUE	7.92997e-05	36.6666
Alcohol intake frequency. || id:ukb-b-5779	28	rs2244598	C	T	C	T	-0.018378	0.0034	0.605114	0.6241	FALSE	FALSE	FALSE	ieu-b-7	1	216681000	0.0237	468692	0.8852	Parkinson's disease || id:ieu-b-7	Parkinson's disease	Parkinson's disease || ||	TRUE	igd	216681000	3.79997e-09	0.00311907	1	462346	ukb-b-5779	Alcohol intake frequency. || id:ukb-b-5779	TRUE	reported	igd	2	1	TRUE	7.50839e-05	34.7172
Alcohol intake frequency. || id:ukb-b-5779	29	rs2411453	G	T	G	T	-0.0350793	0.049	0.597353	0.6185	FALSE	FALSE	FALSE	ieu-b-7	16	28632021	0.0185	482730	0.00810793	Parkinson's disease || id:ieu-b-7	Parkinson's disease	Parkinson's disease || ||	TRUE	igd	28632021	7.29962e-30	0.00309039	16	462346	ukb-b-5779	Alcohol intake frequency. || id:ukb-b-5779	TRUE	reported	igd	2	1	TRUE	0.000278604	128.847
Alcohol intake frequency. || id:ukb-b-5779	30	rs2535911	T	C	T	C	-0.0188476	-0.0091	0.354749	0.3379	FALSE	FALSE	FALSE	ieu-b-7	14	73532676	0.019	482730	0.6326	Parkinson's disease || id:ieu-b-7	Parkinson's disease	Parkinson's disease || ||	TRUE	igd	73523162	2.69998e-09	0.00316849	14	462346	ukb-b-5779	Alcohol intake frequency. || id:ukb-b-5779	TRUE	reported	igd	2	1	TRUE	7.65257e-05	35.3839
Alcohol intake frequency. || id:ukb-b-5779	31	rs2622167	A	G	A	G	-0.0191155	0.004	0.428653	0.4304	FALSE	FALSE	FALSE	ieu-b-7	7	153486704	0.0192	482202	0.8335	Parkinson's disease || id:ieu-b-7	Parkinson's disease	Parkinson's disease || ||	TRUE	igd	153486704	4.60002e-10	0.0030674	7	462346	ukb-b-5779	Alcohol intake frequency. || id:ukb-b-5779	TRUE	reported	igd	2	1	TRUE	8.39899e-05	38.8355
Alcohol intake frequency. || id:ukb-b-5779	32	rs262240	T	C	T	C	-0.017207	-0.0105	0.468553	0.4781	FALSE	FALSE	FALSE	ieu-b-7	3	68408109	0.0223	468692	0.6384	Parkinson's disease || id:ieu-b-7	Parkinson's disease	Parkinson's disease || ||	TRUE	igd	68408109	1.40001e-08	0.00303483	3	462346	ukb-b-5779	Alcohol intake frequency. || id:ukb-b-5779	TRUE	reported	igd	2	1	TRUE	6.95255e-05	32.1469
Alcohol intake frequency. || id:ukb-b-5779	33	rs2717063	A	C	A	C	-0.0203704	0.0151	0.585731	0.594	FALSE	FALSE	FALSE	ieu-b-7	2	58110969	0.0181	482730	0.4043	Parkinson's disease || id:ieu-b-7	Parkinson's disease	Parkinson's disease || ||	TRUE	igd	58110969	4.00037e-11	0.00308457	2	462346	ukb-b-5779	Alcohol intake frequency. || id:ukb-b-5779	TRUE	reported	igd	2	1	TRUE	9.43196e-05	43.6122
Alcohol intake frequency. || id:ukb-b-5779	34	rs28768122	C	T	C	T	0.0207	0.034	0.759525	0.7559	FALSE	FALSE	FALSE	ieu-b-7	12	123885974	0.0196	482730	0.0825905	Parkinson's disease || id:ieu-b-7	Parkinson's disease	Parkinson's disease || ||	TRUE	igd	123885974	5.60003e-09	0.00355204	12	462346	ukb-b-5779	Alcohol intake frequency. || id:ukb-b-5779	TRUE	reported	igd	2	1	TRUE	7.3449e-05	33.9612
Alcohol intake frequency. || id:ukb-b-5779	35	rs28787109	A	G	A	G	0.0178107	-0.0056	0.40423	0.4289	FALSE	FALSE	FALSE	ieu-b-7	1	51220127	0.022	471013	0.8007	Parkinson's disease || id:ieu-b-7	Parkinson's disease	Parkinson's disease || ||	TRUE	igd	51218695	7.69999e-09	0.00308461	1	462346	ukb-b-5779	Alcohol intake frequency. || id:ukb-b-5779	TRUE	reported	igd	2	1	TRUE	7.21046e-05	33.3395
Alcohol intake frequency. || id:ukb-b-5779	36	rs2924321	A	G	A	G	-0.0195131	-0.02	0.539592	0.5244	FALSE	FALSE	FALSE	ieu-b-7	18	53125435	0.0206	482730	0.331	Parkinson's disease || id:ieu-b-7	Parkinson's disease	Parkinson's disease || ||	TRUE	igd	53125435	1.6e-10	0.00305022	18	462346	ukb-b-5779	Alcohol intake frequency. || id:ukb-b-5779	TRUE	reported	igd	2	1	TRUE	8.85084e-05	40.925
Alcohol intake frequency. || id:ukb-b-5779	37	rs2977454	G	C	G	C	-0.0259222	0.0513	0.124072	0.1195	FALSE	TRUE	FALSE	ieu-b-7	8	141539923	0.0349	468692	0.1418	Parkinson's disease || id:ieu-b-7	Parkinson's disease	Parkinson's disease || ||	TRUE	igd	141539923	1.7e-08	0.00459853	8	462346	ukb-b-5779	Alcohol intake frequency. || id:ukb-b-5779	TRUE	reported	igd	2	1	TRUE	6.8724e-05	31.7763
Alcohol intake frequency. || id:ukb-b-5779	38	rs34440851	T	C	T	C	-0.0226831	0.011	0.157151	0.1547	FALSE	FALSE	FALSE	ieu-b-7	8	87214346	0.0254	482730	0.6659	Parkinson's disease || id:ieu-b-7	Parkinson's disease	Parkinson's disease || ||	TRUE	igd	87214346	4.60002e-08	0.00415058	8	462346	ukb-b-5779	Alcohol intake frequency. || id:ukb-b-5779	TRUE	reported	igd	2	1	TRUE	6.4594e-05	29.8666
Alcohol intake frequency. || id:ukb-b-5779	39	rs34473884	A	G	A	G	-0.0203615	0.0501	0.24819	0.237	FALSE	FALSE	FALSE	ieu-b-7	10	133761285	0.0205	480593	0.0145301	Parkinson's disease || id:ieu-b-7	Parkinson's disease	Parkinson's disease || ||	TRUE	igd	133761285	6.19998e-09	0.00350346	10	462346	ukb-b-5779	Alcohol intake frequency. || id:ukb-b-5779	TRUE	reported	igd	2	1	TRUE	7.3051e-05	33.7772
Alcohol intake frequency. || id:ukb-b-5779	40	rs34631026	T	C	T	C	-0.0169128	-0.0597	0.446061	0.4423	FALSE	FALSE	FALSE	ieu-b-7	16	6172126	0.0225	468692	0.00813992	Parkinson's disease || id:ieu-b-7	Parkinson's disease	Parkinson's disease || ||	TRUE	igd	6172126	2.90001e-08	0.00304832	16	462346	ukb-b-5779	Alcohol intake frequency. || id:ukb-b-5779	TRUE	reported	igd	2	1	TRUE	6.65754e-05	30.7828
Alcohol intake frequency. || id:ukb-b-5779	41	rs34811474	A	G	A	G	-0.0201809	0.0547	0.230728	0.2198	FALSE	FALSE	FALSE	ieu-b-7	4	25408838	0.0212	482730	0.009794	Parkinson's disease || id:ieu-b-7	Parkinson's disease	Parkinson's disease || ||	TRUE	igd	25408838	1.89998e-08	0.00359305	4	462346	ukb-b-5779	Alcohol intake frequency. || id:ukb-b-5779	TRUE	reported	igd	2	1	TRUE	6.82272e-05	31.5466
Alcohol intake frequency. || id:ukb-b-5779	42	rs35105141	T	C	T	C	0.026345	-0.0337	0.401541	0.3844	FALSE	FALSE	FALSE	ieu-b-7	16	30057148	0.018	482730	0.0607897	Parkinson's disease || id:ieu-b-7	Parkinson's disease	Parkinson's disease || ||	TRUE	igd	30057148	1.39991e-17	0.00308788	16	462346	ukb-b-5779	Alcohol intake frequency. || id:ukb-b-5779	TRUE	reported	igd	2	1	TRUE	0.000157413	72.7903
Alcohol intake frequency. || id:ukb-b-5779	43	rs362307	T	C	T	C	0.0433047	0.0358	0.074582	0.0714	FALSE	FALSE	FALSE	ieu-b-7	4	3241845	0.0385	482730	0.3528	Parkinson's disease || id:ieu-b-7	Parkinson's disease	Parkinson's disease || ||	TRUE	igd	3241845	8.4004e-14	0.00580219	4	462346	ukb-b-5779	Alcohol intake frequency. || id:ukb-b-5779	TRUE	reported	igd	2	1	TRUE	0.000120467	55.7037
Alcohol intake frequency. || id:ukb-b-5779	44	rs4241258	T	C	T	C	0.0250636	-0.031	0.13763	0.1416	FALSE	FALSE	FALSE	ieu-b-7	2	74226102	0.0287	482730	0.2797	Parkinson's disease || id:ieu-b-7	Parkinson's disease	Parkinson's disease || ||	TRUE	igd	74226102	1.29999e-08	0.00440325	2	462346	ukb-b-5779	Alcohol intake frequency. || id:ukb-b-5779	TRUE	reported	igd	2	1	TRUE	7.00717e-05	32.3995
Alcohol intake frequency. || id:ukb-b-5779	45	rs4242715	A	G	A	G	-0.0186543	0.0119	0.680585	0.6687	FALSE	FALSE	FALSE	ieu-b-7	10	133986135	0.0238	468692	0.6181	Parkinson's disease || id:ieu-b-7	Parkinson's disease	Parkinson's disease || ||	TRUE	igd	133986135	9.29994e-09	0.00324831	10	462346	ukb-b-5779	Alcohol intake frequency. || id:ukb-b-5779	TRUE	reported	igd	2	1	TRUE	7.13255e-05	32.9793
Alcohol intake frequency. || id:ukb-b-5779	46	rs4417025	A	G	A	G	-0.0188379	-0.0003	0.361153	0.3402	FALSE	FALSE	FALSE	ieu-b-7	1	35363679	0.0238	468692	0.9912	Parkinson's disease || id:ieu-b-7	Parkinson's disease	Parkinson's disease || ||	TRUE	igd	35363679	2.69998e-09	0.00316516	1	462346	ukb-b-5779	Alcohol intake frequency. || id:ukb-b-5779	TRUE	reported	igd	2	1	TRUE	7.66078e-05	35.4219
Alcohol intake frequency. || id:ukb-b-5779	47	rs4503294	T	C	T	C	0.0181476	-0.0149	0.565333	0.571	FALSE	FALSE	FALSE	ieu-b-7	1	940096	0.0182	482730	0.4123	Parkinson's disease || id:ieu-b-7	Parkinson's disease	Parkinson's disease || ||	TRUE	igd	940096	3.40001e-09	0.00307049	1	462346	ukb-b-5779	Alcohol intake frequency. || id:ukb-b-5779	TRUE	reported	igd	2	1	TRUE	7.5548e-05	34.9318
Alcohol intake frequency. || id:ukb-b-5779	48	rs461599	C	A	C	A	-0.0191888	-0.0047	0.462259	0.4625	FALSE	FALSE	FALSE	ieu-b-7	5	144136931	0.0212	470485	0.8249	Parkinson's disease || id:ieu-b-7	Parkinson's disease	Parkinson's disease || ||	TRUE	igd	144136931	2.69998e-10	0.00303977	5	462346	ukb-b-5779	Alcohol intake frequency. || id:ukb-b-5779	TRUE	reported	igd	2	1	TRUE	8.61806e-05	39.8485
Alcohol intake frequency. || id:ukb-b-5779	49	rs4726481	T	G	T	G	0.0217614	-0.0089	0.400576	0.4582	FALSE	FALSE	FALSE	ieu-b-7	7	141672604	0.0168	482730	0.5955	Parkinson's disease || id:ieu-b-7	Parkinson's disease	Parkinson's disease || ||	TRUE	igd	141668403	2.29985e-12	0.00310188	7	462346	ukb-b-5779	Alcohol intake frequency. || id:ukb-b-5779	TRUE	reported	igd	2	1	TRUE	0.000106441	49.2178
Alcohol intake frequency. || id:ukb-b-5779	50	rs473098	T	C	T	C	-0.0217406	0.0144	0.557689	0.5692	FALSE	FALSE	FALSE	ieu-b-7	2	45139779	0.0175	482730	0.412	Parkinson's disease || id:ieu-b-7	Parkinson's disease	Parkinson's disease || ||	TRUE	igd	45139779	9.09913e-13	0.00304345	2	462346	ukb-b-5779	Alcohol intake frequency. || id:ukb-b-5779	TRUE	reported	igd	2	1	TRUE	0.000110356	51.028
Alcohol intake frequency. || id:ukb-b-5779	51	rs489062	A	G	A	G	0.0166498	-0.002	0.437454	0.4307	FALSE	FALSE	FALSE	ieu-b-7	10	99715744	0.0203	482730	0.922	Parkinson's disease || id:ieu-b-7	Parkinson's disease	Parkinson's disease || ||	TRUE	igd	99715744	4.90004e-08	0.00305291	10	462346	ukb-b-5779	Alcohol intake frequency. || id:ukb-b-5779	TRUE	reported	igd	2	1	TRUE	6.43273e-05	29.7432
Alcohol intake frequency. || id:ukb-b-5779	52	rs4916723	C	A	C	A	0.0239479	-0.0214	0.420617	0.3749	FALSE	FALSE	FALSE	ieu-b-7	5	87896602	0.023	468692	0.3521	Parkinson's disease || id:ieu-b-7	Parkinson's disease	Parkinson's disease || ||	TRUE	igd	87854395	1.10002e-14	0.00309951	5	462346	ukb-b-5779	Alcohol intake frequency. || id:ukb-b-5779	TRUE	reported	igd	2	1	TRUE	0.0001291	59.6962
Alcohol intake frequency. || id:ukb-b-5779	53	rs4940926	C	T	C	T	-0.0191003	-0.0012	0.735045	0.738	FALSE	FALSE	FALSE	ieu-b-7	18	57732418	0.0197	482730	0.9502	Parkinson's disease || id:ieu-b-7	Parkinson's disease	Parkinson's disease || ||	TRUE	igd	57732418	2.80001e-08	0.00344068	18	462346	ukb-b-5779	Alcohol intake frequency. || id:ukb-b-5779	TRUE	reported	igd	2	1	TRUE	6.66493e-05	30.817
Alcohol intake frequency. || id:ukb-b-5779	54	rs4968391	T	G	T	G	-0.0192695	-0.0154	0.674892	0.6427	FALSE	FALSE	FALSE	ieu-b-7	17	57780943	0.0208	480593	0.46	Parkinson's disease || id:ieu-b-7	Parkinson's disease	Parkinson's disease || ||	TRUE	igd	57780943	2.30001e-09	0.0032265	17	462346	ukb-b-5779	Alcohol intake frequency. || id:ukb-b-5779	TRUE	reported	igd	2	1	TRUE	7.71395e-05	35.6677
Alcohol intake frequency. || id:ukb-b-5779	55	rs5022348	T	C	T	C	0.0202641	0.0048	0.40703	0.581	FALSE	FALSE	FALSE	ieu-b-7	18	22647270	0.0227	468692	0.8341	Parkinson's disease || id:ieu-b-7	Parkinson's disease	Parkinson's disease || ||	TRUE	igd	22639237	1.40001e-08	0.00357005	18	462346	ukb-b-5779	Alcohol intake frequency. || id:ukb-b-5779	TRUE	reported	igd	2	1	TRUE	6.96801e-05	32.2184
Alcohol intake frequency. || id:ukb-b-5779	56	rs550942	T	C	T	C	0.022401	-0.0303	0.823865	0.8333	FALSE	FALSE	FALSE	ieu-b-7	11	58394154	0.0251	482730	0.227	Parkinson's disease || id:ieu-b-7	Parkinson's disease	Parkinson's disease || ||	TRUE	igd	58394154	2e-08	0.00398884	11	462346	ukb-b-5779	Alcohol intake frequency. || id:ukb-b-5779	TRUE	reported	igd	2	1	TRUE	6.82095e-05	31.5384
Alcohol intake frequency. || id:ukb-b-5779	57	rs56194430	T	C	T	C	0.0225403	0.0135	0.16931	0.1671	FALSE	FALSE	FALSE	ieu-b-7	5	67824690	0.0308	468692	0.661601	Parkinson's disease || id:ieu-b-7	Parkinson's disease	Parkinson's disease || ||	TRUE	igd	67824690	3.09999e-08	0.00407148	5	462346	ukb-b-5779	Alcohol intake frequency. || id:ukb-b-5779	TRUE	reported	igd	2	1	TRUE	6.62856e-05	30.6488
Alcohol intake frequency. || id:ukb-b-5779	58	rs58905411	A	G	A	G	-0.0266343	-0.0067	0.410052	0.4021	FALSE	FALSE	FALSE	ieu-b-7	12	54623132	0.0198	482730	0.733701	Parkinson's disease || id:ieu-b-7	Parkinson's disease	Parkinson's disease || ||	TRUE	igd	54623132	5.10035e-18	0.00307848	12	462346	ukb-b-5779	Alcohol intake frequency. || id:ukb-b-5779	TRUE	reported	igd	2	1	TRUE	0.000161872	74.8528
Alcohol intake frequency. || id:ukb-b-5779	59	rs6030200	A	G	A	G	-0.019529	-0.003	0.31415	0.3139	FALSE	FALSE	FALSE	ieu-b-7	20	35554361	0.0196	482730	0.8787	Parkinson's disease || id:ieu-b-7	Parkinson's disease	Parkinson's disease || ||	TRUE	igd	35554361	2.39999e-09	0.00327075	20	462346	ukb-b-5779	Alcohol intake frequency. || id:ukb-b-5779	TRUE	reported	igd	2	1	TRUE	7.71018e-05	35.6503
Alcohol intake frequency. || id:ukb-b-5779	60	rs61873510	T	G	T	G	0.0203737	-0.0201	0.32785	0.3349	FALSE	FALSE	FALSE	ieu-b-7	10	102626510	0.0243	27693	0.408	Parkinson's disease || id:ieu-b-7	Parkinson's disease	Parkinson's disease || ||	TRUE	igd	102626510	6.90001e-10	0.00330311	10	462346	ukb-b-5779	Alcohol intake frequency. || id:ukb-b-5779	TRUE	reported	igd	2	1	TRUE	8.22794e-05	38.0445
Alcohol intake frequency. || id:ukb-b-5779	61	rs62305780	G	C	G	C	-0.0485216	-0.0221	0.102253	0.0961	FALSE	TRUE	FALSE	ieu-b-7	4	100290815	0.0316	482730	0.4845	Parkinson's disease || id:ieu-b-7	Parkinson's disease	Parkinson's disease || ||	TRUE	igd	100290815	9.8992e-22	0.00506585	4	462346	ukb-b-5779	Alcohol intake frequency. || id:ukb-b-5779	TRUE	reported	igd	2	1	TRUE	0.000198387	91.741
Alcohol intake frequency. || id:ukb-b-5779	62	rs62339673	A	C	A	C	0.0182943	-0.0026	0.626705	0.6179	FALSE	FALSE	FALSE	ieu-b-7	4	184828533	0.0231	468692	0.9099	Parkinson's disease || id:ieu-b-7	Parkinson's disease	Parkinson's disease || ||	TRUE	igd	184828533	6.59994e-09	0.00315406	4	462346	ukb-b-5779	Alcohol intake frequency. || id:ukb-b-5779	TRUE	reported	igd	2	1	TRUE	7.276e-05	33.6426
Alcohol intake frequency. || id:ukb-b-5779	63	rs62466318	T	C	T	C	-0.0254919	-0.0308	0.202827	0.1901	FALSE	FALSE	FALSE	ieu-b-7	7	73042085	0.0229	480593	0.1787	Parkinson's disease || id:ieu-b-7	Parkinson's disease	Parkinson's disease || ||	TRUE	igd	73042085	1.39991e-11	0.0037742	7	462346	ukb-b-5779	Alcohol intake frequency. || id:ukb-b-5779	TRUE	reported	igd	2	1	TRUE	9.86608e-05	45.6197
Alcohol intake frequency. || id:ukb-b-5779	64	rs650558	T	C	T	C	0.0207362	-0.0661	0.247918	0.2327	FALSE	FALSE	FALSE	ieu-b-7	17	40721042	0.0201	482730	0.00102499	Parkinson's disease || id:ieu-b-7	Parkinson's disease	Parkinson's disease || ||	TRUE	igd	40721042	3.40001e-09	0.0035079	17	462346	ukb-b-5779	Alcohol intake frequency. || id:ukb-b-5779	TRUE	reported	igd	2	1	TRUE	7.55725e-05	34.9432
Alcohol intake frequency. || id:ukb-b-5779	65	rs6727281	T	C	T	C	-0.024322	0.0357	0.184023	0.1815	FALSE	FALSE	FALSE	ieu-b-7	2	65558588	0.0284	471013	0.2096	Parkinson's disease || id:ieu-b-7	Parkinson's disease	Parkinson's disease || ||	TRUE	igd	65558588	5.49997e-10	0.00391964	2	462346	ukb-b-5779	Alcohol intake frequency. || id:ukb-b-5779	TRUE	reported	igd	2	1	TRUE	8.32728e-05	38.5039
Alcohol intake frequency. || id:ukb-b-5779	66	rs6943160	C	T	C	T	0.020627	-0.0129	0.208646	0.2114	FALSE	FALSE	FALSE	ieu-b-7	7	99872071	0.0219	482730	0.557	Parkinson's disease || id:ieu-b-7	Parkinson's disease	Parkinson's disease || ||	TRUE	igd	99872071	3.09999e-08	0.00372774	7	462346	ukb-b-5779	Alcohol intake frequency. || id:ukb-b-5779	TRUE	reported	igd	2	1	TRUE	6.62194e-05	30.6182
Alcohol intake frequency. || id:ukb-b-5779	67	rs71651683	T	C	T	C	-0.0704589	0.029	0.0142	0.0155	FALSE	FALSE	FALSE	ieu-b-7	22	24828853	0.073	482730	0.6911	Parkinson's disease || id:ieu-b-7	Parkinson's disease	Parkinson's disease || ||	TRUE	igd	24828853	3.59998e-08	0.0127906	22	462346	ukb-b-5779	Alcohol intake frequency. || id:ukb-b-5779	TRUE	reported	igd	2	1	TRUE	6.56288e-05	30.3451
Alcohol intake frequency. || id:ukb-b-5779	68	rs72769229	T	A	T	A	-0.0231352	-0.0041	0.154942	0.1493	FALSE	TRUE	FALSE	ieu-b-7	2	2220795	0.0313	468692	0.8962	Parkinson's disease || id:ieu-b-7	Parkinson's disease	Parkinson's disease || ||	TRUE	igd	2220795	3.40001e-08	0.00419154	2	462346	ukb-b-5779	Alcohol intake frequency. || id:ukb-b-5779	TRUE	reported	igd	2	1	TRUE	6.58876e-05	30.4647
Alcohol intake frequency. || id:ukb-b-5779	69	rs72787062	A	G	A	G	-0.0281947	-0.0067	0.162767	0.1592	FALSE	FALSE	FALSE	ieu-b-7	16	72105844	0.0243	480593	0.7813	Parkinson's disease || id:ieu-b-7	Parkinson's disease	Parkinson's disease || ||	TRUE	igd	72105844	6.4003e-12	0.00410324	16	462346	ukb-b-5779	Alcohol intake frequency. || id:ukb-b-5779	TRUE	reported	igd	2	1	TRUE	0.00010211	47.2149
Alcohol intake frequency. || id:ukb-b-5779	70	rs728538	G	T	G	T	0.0228752	-0.0184	0.168868	0.1734	FALSE	FALSE	FALSE	ieu-b-7	16	51205819	0.0304	468692	0.5455	Parkinson's disease || id:ieu-b-7	Parkinson's disease	Parkinson's disease || ||	TRUE	igd	51205819	1.79999e-08	0.00406259	16	462346	ukb-b-5779	Alcohol intake frequency. || id:ukb-b-5779	TRUE	reported	igd	2	1	TRUE	6.85689e-05	31.7046
Alcohol intake frequency. || id:ukb-b-5779	71	rs7298932	G	A	G	A	-0.0237214	-0.0359	0.147849	0.1452	FALSE	FALSE	FALSE	ieu-b-7	12	23727301	0.0321	468692	0.2639	Parkinson's disease || id:ieu-b-7	Parkinson's disease	Parkinson's disease || ||	TRUE	igd	23727301	3.79997e-08	0.00431166	12	462346	ukb-b-5779	Alcohol intake frequency. || id:ukb-b-5779	TRUE	reported	igd	2	1	TRUE	6.5463e-05	30.2684
Alcohol intake frequency. || id:ukb-b-5779	72	rs7302200	A	G	A	G	-0.0184222	0.0136	0.339998	0.3312	FALSE	FALSE	FALSE	ieu-b-7	12	56449435	0.0187	482730	0.468	Parkinson's disease || id:ieu-b-7	Parkinson's disease	Parkinson's disease || ||	TRUE	igd	56449435	8.40001e-09	0.00319841	12	462346	ukb-b-5779	Alcohol intake frequency. || id:ukb-b-5779	TRUE	reported	igd	2	1	TRUE	7.17491e-05	33.1751
Alcohol intake frequency. || id:ukb-b-5779	73	rs73050128	A	C	A	C	-0.0260048	-0.0113	0.164488	0.1889	FALSE	FALSE	FALSE	ieu-b-7	7	1962163	0.0219	482730	0.6055	Parkinson's disease || id:ieu-b-7	Parkinson's disease	Parkinson's disease || ||	TRUE	igd	1961882	2.1e-10	0.00409088	7	462346	ukb-b-5779	Alcohol intake frequency. || id:ukb-b-5779	TRUE	reported	igd	2	1	TRUE	8.73914e-05	40.4084
Alcohol intake frequency. || id:ukb-b-5779	74	rs7330939	T	C	T	C	-0.0213301	0.0185	0.720352	0.7358	FALSE	FALSE	FALSE	ieu-b-7	13	49971400	0.0192	482730	0.3355	Parkinson's disease || id:ieu-b-7	Parkinson's disease	Parkinson's disease || ||	TRUE	igd	49971400	3.69999e-10	0.0034046	13	462346	ukb-b-5779	Alcohol intake frequency. || id:ukb-b-5779	TRUE	reported	igd	2	1	TRUE	8.48886e-05	39.2511
Alcohol intake frequency. || id:ukb-b-5779	75	rs74679146	C	T	C	T	-0.0320735	0.0738	0.074515	0.0716	FALSE	FALSE	FALSE	ieu-b-7	9	16287769	0.0443	468692	0.0960395	Parkinson's disease || id:ieu-b-7	Parkinson's disease	Parkinson's disease || ||	TRUE	igd	16287769	2.5e-08	0.00575757	9	462346	ukb-b-5779	Alcohol intake frequency. || id:ukb-b-5779	TRUE	reported	igd	2	1	TRUE	6.71148e-05	31.0322
Alcohol intake frequency. || id:ukb-b-5779	76	rs7514579	C	A	C	A	0.0196672	-0.0148	0.232457	0.2363	FALSE	FALSE	FALSE	ieu-b-7	1	94051350	0.0258	470485	0.5657	Parkinson's disease || id:ieu-b-7	Parkinson's disease	Parkinson's disease || ||	TRUE	igd	94051350	4.60002e-08	0.00359788	1	462346	ukb-b-5779	Alcohol intake frequency. || id:ukb-b-5779	TRUE	reported	igd	2	1	TRUE	6.46244e-05	29.8806
Alcohol intake frequency. || id:ukb-b-5779	77	rs76082653	T	C	T	C	0.0464269	-0.14	0.054327	0.0466	FALSE	FALSE	FALSE	ieu-b-7	3	49029468	0.0472	482730	0.00302197	Parkinson's disease || id:ieu-b-7	Parkinson's disease	Parkinson's disease || ||	TRUE	igd	49029468	3.80014e-12	0.00668673	3	462346	ukb-b-5779	Alcohol intake frequency. || id:ukb-b-5779	TRUE	reported	igd	2	1	TRUE	0.000104256	48.207
Alcohol intake frequency. || id:ukb-b-5779	78	rs7610856	A	C	A	C	-0.023864	0.0225	0.429053	0.4344	FALSE	FALSE	FALSE	ieu-b-7	3	71579022	0.0227	468692	0.3229	Parkinson's disease || id:ieu-b-7	Parkinson's disease	Parkinson's disease || ||	TRUE	igd	71579022	7.70016e-15	0.00307022	3	462346	ukb-b-5779	Alcohol intake frequency. || id:ukb-b-5779	TRUE	reported	igd	2	1	TRUE	0.000130654	60.4151
Alcohol intake frequency. || id:ukb-b-5779	79	rs780094	C	T	C	T	-0.0509938	0.0714	0.615206	0.5877	FALSE	FALSE	FALSE	ieu-b-7	2	27742603	0.0173	482730	3.721e-05	Parkinson's disease || id:ieu-b-7	Parkinson's disease	Parkinson's disease || ||	TRUE	igd	27741237	1.29987e-60	0.00310506	2	462346	ukb-b-5779	Alcohol intake frequency. || id:ukb-b-5779	TRUE	reported	igd	2	1	TRUE	0.000583008	269.707
Alcohol intake frequency. || id:ukb-b-5779	80	rs780569	A	T	A	T	0.0198033	0.0001	0.70882	0.7222	FALSE	TRUE	FALSE	ieu-b-7	1	4569436	0.025	468692	0.9954	Parkinson's disease || id:ieu-b-7	Parkinson's disease	Parkinson's disease || ||	TRUE	igd	4569436	4e-09	0.00336454	1	462346	ukb-b-5779	Alcohol intake frequency. || id:ukb-b-5779	TRUE	reported	igd	2	1	TRUE	7.49245e-05	34.6435
Alcohol intake frequency. || id:ukb-b-5779	81	rs80292319	C	T	C	T	-0.0393728	-0.0563	0.057704	0.0547	FALSE	FALSE	FALSE	ieu-b-7	15	76508632	0.0396	482730	0.1553	Parkinson's disease || id:ieu-b-7	Parkinson's disease	Parkinson's disease || ||	TRUE	igd	76508632	1.40001e-09	0.00649583	15	462346	ukb-b-5779	Alcohol intake frequency. || id:ukb-b-5779	TRUE	reported	igd	2	1	TRUE	7.94551e-05	36.7385
Alcohol intake frequency. || id:ukb-b-5779	82	rs8043563	C	G	C	G	0.0233654	-0.0376	0.737192	0.7388	FALSE	TRUE	FALSE	ieu-b-7	16	19982353	0.0258	468692	0.1454	Parkinson's disease || id:ieu-b-7	Parkinson's disease	Parkinson's disease || ||	TRUE	igd	19982353	1.69981e-11	0.00347125	16	462346	ukb-b-5779	Alcohol intake frequency. || id:ukb-b-5779	TRUE	reported	igd	2	1	TRUE	9.79862e-05	45.3078
Alcohol intake frequency. || id:ukb-b-5779	83	rs838145	A	G	A	G	0.0219548	0.0185	0.542982	0.5206	FALSE	FALSE	FALSE	ieu-b-7	19	49250239	0.0172	482730	0.2821	Parkinson's disease || id:ieu-b-7	Parkinson's disease	Parkinson's disease || ||	TRUE	igd	49248730	6.70039e-13	0.00305549	19	462346	ukb-b-5779	Alcohol intake frequency. || id:ukb-b-5779	TRUE	reported	igd	2	1	TRUE	0.000111656	51.6292
Alcohol intake frequency. || id:ukb-b-5779	84	rs8614	A	C	A	C	0.0247806	-0.0066	0.182509	0.1921	FALSE	FALSE	FALSE	ieu-b-7	17	27588806	0.0259	482730	0.7984	Parkinson's disease || id:ieu-b-7	Parkinson's disease	Parkinson's disease || ||	TRUE	igd	27588806	2.69998e-10	0.00392537	17	462346	ukb-b-5779	Alcohol intake frequency. || id:ukb-b-5779	TRUE	reported	igd	2	1	TRUE	8.61902e-05	39.853
Alcohol intake frequency. || id:ukb-b-5779	85	rs9349379	G	A	G	A	-0.0193455	0.0027	0.405493	0.3983	FALSE	FALSE	FALSE	ieu-b-7	6	12903957	0.0174	482730	0.8777	Parkinson's disease || id:ieu-b-7	Parkinson's disease	Parkinson's disease || ||	TRUE	igd	12903957	3.50002e-10	0.00308215	6	462346	ukb-b-5779	Alcohol intake frequency. || id:ukb-b-5779	TRUE	reported	igd	2	1	TRUE	8.52017e-05	39.3959
Alcohol intake frequency. || id:ukb-b-5779	86	rs9372625	A	G	A	G	-0.0255579	0.0505	0.381706	0.385	FALSE	FALSE	FALSE	ieu-b-7	6	98344031	0.0229	468692	0.0275899	Parkinson's disease || id:ieu-b-7	Parkinson's disease	Parkinson's disease || ||	TRUE	igd	98344031	2.90001e-16	0.00312467	6	462346	ukb-b-5779	Alcohol intake frequency. || id:ukb-b-5779	TRUE	reported	igd	2	1	TRUE	0.000144681	66.9022
Alcohol intake frequency. || id:ukb-b-5779	87	rs9403297	A	G	A	G	0.0188234	-0.0466	0.372967	0.3881	FALSE	FALSE	FALSE	ieu-b-7	6	141705482	0.018	482730	0.00941499	Parkinson's disease || id:ieu-b-7	Parkinson's disease	Parkinson's disease || ||	TRUE	igd	141705482	1.79999e-09	0.00313037	6	462346	ukb-b-5779	Alcohol intake frequency. || id:ukb-b-5779	TRUE	reported	igd	2	1	TRUE	7.81995e-05	36.1579
Alcohol intake frequency. || id:ukb-b-5779	88	rs9648478	A	G	A	G	0.0168603	-0.0252	0.510245	0.5101	FALSE	FALSE	FALSE	ieu-b-7	7	39327468	0.0222	468692	0.2572	Parkinson's disease || id:ieu-b-7	Parkinson's disease	Parkinson's disease || ||	TRUE	igd	39325802	2.59998e-08	0.00302891	7	462346	ukb-b-5779	Alcohol intake frequency. || id:ukb-b-5779	TRUE	reported	igd	2	1	TRUE	6.70134e-05	30.9853
Alcohol intake frequency. || id:ukb-b-5779	89	rs9814516	T	G	T	G	-0.0251117	0.0327	0.237423	0.2503	FALSE	FALSE	FALSE	ieu-b-7	3	85407980	0.0222	482730	0.1396	Parkinson's disease || id:ieu-b-7	Parkinson's disease	Parkinson's disease || ||	TRUE	igd	85407980	1.59993e-12	0.00355589	3	462346	ukb-b-5779	Alcohol intake frequency. || id:ukb-b-5779	TRUE	reported	igd	2	1	TRUE	0.000107855	49.8716
Alcohol intake frequency. || id:ukb-b-5779	90	rs9829192	T	G	T	G	0.0169324	0.0097	0.435133	0.4392	FALSE	FALSE	FALSE	ieu-b-7	3	38569463	0.0176	482730	0.5806	Parkinson's disease || id:ieu-b-7	Parkinson's disease	Parkinson's disease || ||	TRUE	igd	38569463	2.80001e-08	0.00305032	3	462346	ukb-b-5779	Alcohol intake frequency. || id:ukb-b-5779	TRUE	reported	igd	2	1	TRUE	6.66423e-05	30.8137
Alcohol intake frequency. || id:ukb-b-5779	91	rs9906502	A	G	A	G	0.0237883	-0.0138	0.176998	0.1783	FALSE	FALSE	FALSE	ieu-b-7	17	7615745	0.0233	482730	0.554201	Parkinson's disease || id:ieu-b-7	Parkinson's disease	Parkinson's disease || ||	TRUE	igd	7615745	1.89998e-09	0.00396178	17	462346	ukb-b-5779	Alcohol intake frequency. || id:ukb-b-5779	TRUE	reported	igd	2	1	TRUE	7.79732e-05	36.0532
Alcoholic drinks per week || id:ieu-b-73	1	rs10085696	G	A	G	A	-0.0160517	-0.0375	0.201	0.1908	FALSE	FALSE	FALSE	ieu-b-7	7	69783020	0.0275	470485	0.1723	Parkinson's disease || id:ieu-b-7	Parkinson's disease	Parkinson's disease || ||	TRUE	igd	69783020	1.24e-10	0.00249471	7	535056	ieu-b-73	Alcoholic drinks per week || id:ieu-b-73	TRUE	reported	igd	2	1	TRUE	7.73694e-05	41.4
Alcoholic drinks per week || id:ieu-b-73	2	rs11860773	C	T	C	T	-0.0150051	0.0124	0.176	0.1864	FALSE	FALSE	FALSE	ieu-b-7	16	73912503	0.0301	468692	0.680201	Parkinson's disease || id:ieu-b-7	Parkinson's disease	Parkinson's disease || ||	TRUE	igd	73912503	8.35007e-10	0.00244381	16	515422	ieu-b-73	Alcoholic drinks per week || id:ieu-b-73	TRUE	reported	igd	2	1	TRUE	7.31389e-05	37.7
Alcoholic drinks per week || id:ieu-b-73	3	rs1229984	C	T	C	T	0.188115	-0.0851	0.953	0.937	FALSE	FALSE	FALSE	ieu-b-7	4	100239319	0.0453	482730	0.0605299	Parkinson's disease || id:ieu-b-7	Parkinson's disease	Parkinson's disease || ||	TRUE	igd	100239319	1e-200	0.00617852	4	514602	ieu-b-73	Alcoholic drinks per week || id:ieu-b-73	TRUE	reported	igd	2	1	TRUE	0.00179815	926.993
Alcoholic drinks per week || id:ieu-b-73	4	rs1260326	C	T	C	T	0.023812	0.0678	0.595	0.5801	FALSE	FALSE	FALSE	ieu-b-7	2	27730940	0.0172	482730	8.23797e-05	Parkinson's disease || id:ieu-b-7	Parkinson's disease	Parkinson's disease || ||	TRUE	igd	27730940	3.32966e-33	0.00198433	2	532340	ieu-b-73	Alcoholic drinks per week || id:ieu-b-73	TRUE	reported	igd	2	1	TRUE	0.000270432	144
Alcoholic drinks per week || id:ieu-b-73	5	rs13107325	T	C	T	C	-0.0364548	-0.0311	0.0654	0.0751	FALSE	FALSE	FALSE	ieu-b-7	4	103188709	0.032	482730	0.3311	Parkinson's disease || id:ieu-b-7	Parkinson's disease	Parkinson's disease || ||	TRUE	igd	103188709	1.22999e-20	0.00391286	4	528164	ieu-b-73	Alcoholic drinks per week || id:ieu-b-73	TRUE	reported	igd	2	1	TRUE	0.000164316	86.7999
Alcoholic drinks per week || id:ieu-b-73	6	rs13332432	G	C	G	C	0.014005	-0.0366	0.296	0.2935	FALSE	TRUE	FALSE	ieu-b-7	16	85721809	0.0249	468692	0.1416	Parkinson's disease || id:ieu-b-7	Parkinson's disease	Parkinson's disease || ||	TRUE	igd	85721809	5.94019e-11	0.00214072	16	516946	ieu-b-73	Alcoholic drinks per week || id:ieu-b-73	TRUE	reported	igd	2	1	TRUE	8.27876e-05	42.8001
Alcoholic drinks per week || id:ieu-b-73	7	rs1387766	A	G	A	G	-0.010827	-0.0087	0.622	0.6213	FALSE	FALSE	FALSE	ieu-b-7	12	92081800	0.0195	480937	0.655101	Parkinson's disease || id:ieu-b-7	Parkinson's disease	Parkinson's disease || ||	TRUE	igd	92081800	4.79005e-08	0.00198336	12	535067	ieu-b-73	Alcoholic drinks per week || id:ieu-b-73	TRUE	reported	igd	2	1	TRUE	5.56905e-05	29.7997
Alcoholic drinks per week || id:ieu-b-73	8	rs153106	C	T	C	T	-0.0136118	-0.039	0.409	0.3902	FALSE	FALSE	FALSE	ieu-b-7	16	28526897	0.0179	482730	0.02947	Parkinson's disease || id:ieu-b-7	Parkinson's disease	Parkinson's disease || ||	TRUE	igd	28526897	3.62994e-12	0.00195858	16	531637	ieu-b-73	Alcoholic drinks per week || id:ieu-b-73	TRUE	reported	igd	2	1	TRUE	9.08435e-05	48.3
Alcoholic drinks per week || id:ieu-b-73	9	rs16854020	A	G	A	G	0.018083	-0.051	0.127	0.1243	FALSE	FALSE	FALSE	ieu-b-7	4	42117559	0.0307	482730	0.0971404	Parkinson's disease || id:ieu-b-7	Parkinson's disease	Parkinson's disease || ||	TRUE	igd	42117559	4.82003e-10	0.0029068	4	533501	ieu-b-73	Alcoholic drinks per week || id:ieu-b-73	TRUE	reported	igd	2	1	TRUE	7.25344e-05	38.6998
Alcoholic drinks per week || id:ieu-b-73	10	rs17542254	G	A	G	A	0.0131418	-0.012	0.251	0.2745	FALSE	FALSE	FALSE	ieu-b-7	11	113655696	0.0217	482730	0.581201	Parkinson's disease || id:ieu-b-7	Parkinson's disease	Parkinson's disease || ||	TRUE	igd	113655696	8.96004e-10	0.00214605	11	533884	ieu-b-73	Alcoholic drinks per week || id:ieu-b-73	TRUE	reported	igd	2	1	TRUE	7.02348e-05	37.4998
Alcoholic drinks per week || id:ieu-b-73	11	rs2049045	C	G	C	G	-0.0137683	-0.0042	0.189	0.1943	FALSE	TRUE	FALSE	ieu-b-7	11	27694241	0.0215	482730	0.8447	Parkinson's disease || id:ieu-b-7	Parkinson's disease	Parkinson's disease || ||	TRUE	igd	27694241	3.97e-08	0.00250539	11	532726	ieu-b-73	Alcoholic drinks per week || id:ieu-b-73	TRUE	reported	igd	2	1	TRUE	5.66867e-05	30.2001
Alcoholic drinks per week || id:ieu-b-73	12	rs2299409	A	G	A	G	-0.0105546	-0.0094	0.493	0.5226	FALSE	FALSE	FALSE	ieu-b-7	7	103812171	0.0176	482730	0.593401	Parkinson's disease || id:ieu-b-7	Parkinson's disease	Parkinson's disease || ||	TRUE	igd	103812171	4.79999e-08	0.00193346	7	534249	ieu-b-73	Alcoholic drinks per week || id:ieu-b-73	TRUE	reported	igd	2	1	TRUE	5.57757e-05	29.7997
Alcoholic drinks per week || id:ieu-b-73	13	rs28680958	A	G	A	G	-0.0135848	-0.015	0.23	0.2258	FALSE	FALSE	FALSE	ieu-b-7	1	173848808	0.0234	482730	0.5217	Parkinson's disease || id:ieu-b-7	Parkinson's disease	Parkinson's disease || ||	TRUE	igd	173848808	9.78003e-09	0.0023684	1	532042	ieu-b-73	Alcoholic drinks per week || id:ieu-b-73	TRUE	reported	igd	2	1	TRUE	6.18335e-05	32.8999
Alcoholic drinks per week || id:ieu-b-73	14	rs28712821	A	G	A	G	0.0283339	0.0007	0.594	0.5935	FALSE	FALSE	FALSE	ieu-b-7	4	39413780	0.0204	482730	0.9734	Parkinson's disease || id:ieu-b-7	Parkinson's disease	Parkinson's disease || ||	TRUE	igd	39413780	1.10002e-46	0.00197411	4	525616	ieu-b-73	Alcoholic drinks per week || id:ieu-b-73	TRUE	reported	igd	2	1	TRUE	0.00039177	206.001
Alcoholic drinks per week || id:ieu-b-73	15	rs28732378	G	A	G	A	-0.0167274	-0.0316	0.729	0.7254	FALSE	FALSE	FALSE	ieu-b-7	3	85403892	0.0214	482730	0.1385	Parkinson's disease || id:ieu-b-7	Parkinson's disease	Parkinson's disease || ||	TRUE	igd	85403892	2.23975e-14	0.00219076	3	530009	ieu-b-73	Alcoholic drinks per week || id:ieu-b-73	TRUE	reported	igd	2	1	TRUE	0.000109986	58.2996
Alcoholic drinks per week || id:ieu-b-73	16	rs28929474	T	C	T	C	-0.0476809	-0.0862	0.0154	0.0174	FALSE	FALSE	FALSE	ieu-b-7	14	94844947	0.0679	482730	0.204	Parkinson's disease || id:ieu-b-7	Parkinson's disease	Parkinson's disease || ||	TRUE	igd	94844947	2.39001e-11	0.00713966	14	528430	ieu-b-73	Alcoholic drinks per week || id:ieu-b-73	TRUE	reported	igd	2	1	TRUE	8.43936e-05	44.5997
Alcoholic drinks per week || id:ieu-b-73	17	rs331939	A	G	A	G	-0.0119016	0.0081	0.339	0.3422	FALSE	FALSE	FALSE	ieu-b-7	4	143654889	0.023	471013	0.7263	Parkinson's disease || id:ieu-b-7	Parkinson's disease	Parkinson's disease || ||	TRUE	igd	143654889	4.49997e-09	0.00202921	4	536700	ieu-b-73	Alcoholic drinks per week || id:ieu-b-73	TRUE	reported	igd	2	1	TRUE	6.4091e-05	34.3997
Alcoholic drinks per week || id:ieu-b-73	18	rs34121753	G	A	G	A	0.0110694	0.0133	0.532	0.5734	FALSE	FALSE	FALSE	ieu-b-7	17	7733833	0.0197	480593	0.5005	Parkinson's disease || id:ieu-b-7	Parkinson's disease	Parkinson's disease || ||	TRUE	igd	7733833	1.38998e-08	0.00195072	17	518183	ieu-b-73	Alcoholic drinks per week || id:ieu-b-73	TRUE	reported	igd	2	1	TRUE	6.21367e-05	32.2001
Alcoholic drinks per week || id:ieu-b-73	19	rs4309187	C	A	C	A	0.0147908	-0.033	0.697	0.6771	FALSE	FALSE	FALSE	ieu-b-7	11	113412443	0.0238	470485	0.1652	Parkinson's disease || id:ieu-b-7	Parkinson's disease	Parkinson's disease || ||	TRUE	igd	113412443	1.36994e-12	0.00208756	11	531063	ieu-b-73	Alcoholic drinks per week || id:ieu-b-73	TRUE	reported	igd	2	1	TRUE	9.45188e-05	50.2
Alcoholic drinks per week || id:ieu-b-73	20	rs4752999	T	C	T	C	-0.0145643	0.0359	0.321	0.3261	FALSE	FALSE	FALSE	ieu-b-7	11	47428565	0.0184	482730	0.0503895	Parkinson's disease || id:ieu-b-7	Parkinson's disease	Parkinson's disease || ||	TRUE	igd	47428565	2.03002e-12	0.00207008	11	529379	ieu-b-73	Alcoholic drinks per week || id:ieu-b-73	TRUE	reported	igd	2	1	TRUE	9.3497e-05	49.4998
Alcoholic drinks per week || id:ieu-b-73	21	rs494904	C	T	C	T	0.0150848	0.022	0.429	0.4038	FALSE	FALSE	FALSE	ieu-b-7	2	45141180	0.0193	482730	0.2537	Parkinson's disease || id:ieu-b-7	Parkinson's disease	Parkinson's disease || ||	TRUE	igd	45141180	1.40994e-14	0.00196055	2	531073	ieu-b-73	Alcoholic drinks per week || id:ieu-b-73	TRUE	reported	igd	2	1	TRUE	0.00011146	59.2
Alcoholic drinks per week || id:ieu-b-73	22	rs55872084	T	G	T	G	0.0127314	-0.0045	0.218	0.2346	FALSE	FALSE	FALSE	ieu-b-7	5	155902003	0.0258	471013	0.8604	Parkinson's disease || id:ieu-b-7	Parkinson's disease	Parkinson's disease || ||	TRUE	igd	155902003	1.98002e-08	0.0022684	5	529669	ieu-b-73	Alcoholic drinks per week || id:ieu-b-73	TRUE	reported	igd	2	1	TRUE	5.94679e-05	31.5001
Alcoholic drinks per week || id:ieu-b-73	23	rs55932213	G	A	G	A	0.0124767	-0.0029	0.701	0.7173	FALSE	FALSE	FALSE	ieu-b-7	9	108755622	0.0257	27693	0.9102	Parkinson's disease || id:ieu-b-7	Parkinson's disease	Parkinson's disease || ||	TRUE	igd	108755622	1.79999e-08	0.002216	9	515956	ieu-b-73	Alcoholic drinks per week || id:ieu-b-73	TRUE	reported	igd	2	1	TRUE	6.14357e-05	31.6999
Alcoholic drinks per week || id:ieu-b-73	24	rs6106989	A	G	A	G	0.0108994	-0.0331	0.628	0.6165	FALSE	FALSE	FALSE	ieu-b-7	20	25027630	0.0196	482730	0.0920301	Parkinson's disease || id:ieu-b-7	Parkinson's disease	Parkinson's disease || ||	TRUE	igd	25027630	3.80996e-08	0.00198336	20	520623	ieu-b-73	Alcoholic drinks per week || id:ieu-b-73	TRUE	reported	igd	2	1	TRUE	5.80034e-05	30.1995
Alcoholic drinks per week || id:ieu-b-73	25	rs6739804	C	T	C	T	-0.0129688	0.0065	0.66	0.6621	FALSE	FALSE	FALSE	ieu-b-7	2	63269604	0.0186	482730	0.7268	Parkinson's disease || id:ieu-b-7	Parkinson's disease	Parkinson's disease || ||	TRUE	igd	63269604	4.71998e-10	0.00208202	2	532202	ieu-b-73	Alcoholic drinks per week || id:ieu-b-73	TRUE	reported	igd	2	1	TRUE	7.2899e-05	38.7997
Alcoholic drinks per week || id:ieu-b-73	26	rs676388	C	T	C	T	0.0150976	-0.0075	0.494	0.503	FALSE	FALSE	FALSE	ieu-b-7	19	49211969	0.017	482730	0.6593	Parkinson's disease || id:ieu-b-7	Parkinson's disease	Parkinson's disease || ||	TRUE	igd	49211969	5.49035e-15	0.00193147	19	531996	ieu-b-73	Alcoholic drinks per week || id:ieu-b-73	TRUE	reported	igd	2	1	TRUE	0.000114837	61.0996
Alcoholic drinks per week || id:ieu-b-73	27	rs6969458	A	G	A	G	0.0127063	0.0024	0.459	0.4682	FALSE	FALSE	FALSE	ieu-b-7	7	153489725	0.0192	482202	0.8999	Parkinson's disease || id:ieu-b-7	Parkinson's disease	Parkinson's disease || ||	TRUE	igd	153489725	5.19996e-11	0.00193545	7	509646	ieu-b-73	Alcoholic drinks per week || id:ieu-b-73	TRUE	reported	igd	2	1	TRUE	8.45608e-05	43.0995
Alcoholic drinks per week || id:ieu-b-73	28	rs75120545	T	C	T	C	-0.0327862	0.1569	0.022	0.0277	FALSE	FALSE	FALSE	ieu-b-7	2	44271496	0.0717	469486	0.0285397	Parkinson's disease || id:ieu-b-7	Parkinson's disease	Parkinson's disease || ||	TRUE	igd	44271496	7.58997e-09	0.00567307	2	474779	ieu-b-73	Alcoholic drinks per week || id:ieu-b-73	TRUE	reported	igd	2	1	TRUE	7.03435e-05	33.3998
Alcoholic drinks per week || id:ieu-b-73	29	rs76640332	A	G	A	G	-0.0210081	-0.2559	0.204	0.2167	FALSE	FALSE	FALSE	ieu-b-7	17	44189858	0.0271	480593	3.64167e-21	Parkinson's disease || id:ieu-b-7	Parkinson's disease	Parkinson's disease || ||	TRUE	igd	44189858	1.46994e-18	0.00238944	17	514949	ieu-b-73	Alcoholic drinks per week || id:ieu-b-73	TRUE	reported	igd	2	1	TRUE	0.00015009	77.3
Alcoholic drinks per week || id:ieu-b-73	30	rs78234152	A	G	A	G	0.0276538	-0.0154	0.0986	0.097	FALSE	FALSE	FALSE	ieu-b-7	4	100279889	0.0311	482730	0.6195	Parkinson's disease || id:ieu-b-7	Parkinson's disease	Parkinson's disease || ||	TRUE	igd	100279889	2.18022e-19	0.00307075	4	534076	ieu-b-73	Alcoholic drinks per week || id:ieu-b-73	TRUE	reported	igd	2	1	TRUE	0.000151828	81.0997
Alcoholic drinks per week || id:ieu-b-73	31	rs79616692	C	G	C	G	0.0188085	-0.0093	0.11	0.1076	FALSE	TRUE	FALSE	ieu-b-7	16	72338507	0.0286	482730	0.746	Parkinson's disease || id:ieu-b-7	Parkinson's disease	Parkinson's disease || ||	TRUE	igd	72338507	2.38002e-09	0.00315231	16	529527	ieu-b-73	Alcoholic drinks per week || id:ieu-b-73	TRUE	reported	igd	2	1	TRUE	6.72254e-05	35.5999
Alcoholic drinks per week || id:ieu-b-73	32	rs962961	T	C	T	C	-0.0121885	0.0219	0.329	0.3315	FALSE	FALSE	FALSE	ieu-b-7	14	57281154	0.0236	468692	0.3542	Parkinson's disease || id:ieu-b-7	Parkinson's disease	Parkinson's disease || ||	TRUE	igd	57281154	2.78003e-09	0.00205146	14	533853	ieu-b-73	Alcoholic drinks per week || id:ieu-b-73	TRUE	reported	igd	2	1	TRUE	6.61187e-05	35.2998

## Sheet: Alcohol&tea&coffee on PD
The information of the SNPs used as IVs for alcohol, tea and coffee.
NO	SNP	exposure	id.exposure	effect_allele.exposure	other_allele.exposure	eaf.exposure	beta.exposure	se.exposure	pval.exposure	chr	pos	beta.outcome	se.outcome	samplesize.outcome	pval.outcome	eaf.outcome	effect_allele.outcome	other_allele.outcome	outcome	id.outcome	originalname.outcome	outcome.deprecated	mr_keep.outcome	data_source.outcome
1	rs10188314	Alcohol intake frequency. || id:ukb-b-5779	ukb-b-5779	T	C	0.470852	-0.0197869	0.00303605	7.19946e-11	2	215402926	0.0112	0.0223	468692	0.6175	0.4695	T	C	Parkinson's disease || id:ieu-b-7	ieu-b-7	Parkinson's disease	Parkinson's disease || ||	TRUE	igd
2	rs10792669	Alcohol intake frequency. || id:ukb-b-5779	ukb-b-5779	G	A	0.505254	0.0174322	0.00304065	9.90011e-09	11	82688356	-0.0087	0.0177	482730	0.625299	0.5006	G	A	Parkinson's disease || id:ieu-b-7	ieu-b-7	Parkinson's disease	Parkinson's disease || ||	TRUE	igd
3	rs11039429	Alcohol intake frequency. || id:ukb-b-5779	ukb-b-5779	T	C	0.454624	-0.0235595	0.00303737	8.69961e-15	11	47867059	-0.0159	0.0172	482730	0.3576	0.4632	T	C	Parkinson's disease || id:ieu-b-7	ieu-b-7	Parkinson's disease	Parkinson's disease || ||	TRUE	igd
4	rs11223617	Alcohol intake frequency. || id:ukb-b-5779	ukb-b-5779	A	G	0.206155	0.0250908	0.00375381	2.29985e-11	11	133780757	-0.0255	0.021	482730	0.2256	0.2094	A	G	Parkinson's disease || id:ieu-b-7	ieu-b-7	Parkinson's disease	Parkinson's disease || ||	TRUE	igd
5	rs11750777	Alcohol intake frequency. || id:ukb-b-5779	ukb-b-5779	A	G	0.209454	-0.020493	0.00372613	3.79997e-08	5	166830787	-0.019	0.0281	468692	0.4986	0.2022	A	G	Parkinson's disease || id:ieu-b-7	ieu-b-7	Parkinson's disease	Parkinson's disease || ||	TRUE	igd
6	rs11787216	Alcohol intake frequency. || id:ukb-b-5779	ukb-b-5779	T	C	0.369127	0.0244162	0.00320078	2.39994e-14	8	142615222	-0.0016	0.0278	13655	0.9536	0.3642	T	C	Parkinson's disease || id:ieu-b-7	ieu-b-7	Parkinson's disease	Parkinson's disease || ||	TRUE	igd
7	rs11940694	Alcohol intake frequency. || id:ukb-b-5779	ukb-b-5779	G	A	0.604193	-0.0437138	0.00311609	1e-44	4	39414993	0.0004	0.0203	482730	0.9849	0.594	G	A	Parkinson's disease || id:ieu-b-7	ieu-b-7	Parkinson's disease	Parkinson's disease || ||	TRUE	igd
8	rs12153855	Alcohol intake frequency. || id:ukb-b-5779	ukb-b-5779	C	T	0.10497	0.0294435	0.00493484	2.39999e-09	6	32074804	0.0495	0.0307	480593	0.1069	0.1066	C	T	Parkinson's disease || id:ieu-b-7	ieu-b-7	Parkinson's disease	Parkinson's disease || ||	TRUE	igd
9	rs1228589	Alcohol intake frequency. || id:ukb-b-5779	ukb-b-5779	A	G	0.246133	0.0210699	0.00352806	2.30001e-09	3	131634826	0.0185	0.0228	482730	0.418	0.2356	A	G	Parkinson's disease || id:ieu-b-7	ieu-b-7	Parkinson's disease	Parkinson's disease || ||	TRUE	igd
10	rs1229984	Alcohol intake frequency. || id:ukb-b-5779	ukb-b-5779	C	T	0.97277	-0.261708	0.00918496	1.39959e-178	4	100239319	-0.0851	0.0453	482730	0.0605299	0.937	C	T	Parkinson's disease || id:ieu-b-7	ieu-b-7	Parkinson's disease	Parkinson's disease || ||	TRUE	igd
11	rs12312693	Alcohol intake frequency. || id:ukb-b-5779	ukb-b-5779	C	T	0.451772	-0.0176811	0.00305026	6.80002e-09	12	57511734	0.0194	0.0173	482730	0.2639	0.425	C	T	Parkinson's disease || id:ieu-b-7	ieu-b-7	Parkinson's disease	Parkinson's disease || ||	TRUE	igd
12	rs13102973	Alcohol intake frequency. || id:ukb-b-5779	ukb-b-5779	C	T	0.61881	-0.0194072	0.00311875	4.90004e-10	4	135900688	-0.0254	0.0228	468692	0.2652	0.6166	C	T	Parkinson's disease || id:ieu-b-7	ieu-b-7	Parkinson's disease	Parkinson's disease || ||	TRUE	igd
13	rs13135092	Alcohol intake frequency. || id:ukb-b-5779	ukb-b-5779	G	A	0.083483	0.0438341	0.00549884	1.59993e-15	4	103198082	-0.0301	0.0315	482730	0.3395	0.0828	G	A	Parkinson's disease || id:ieu-b-7	ieu-b-7	Parkinson's disease	Parkinson's disease || ||	TRUE	igd
14	rs13178443	Alcohol intake frequency. || id:ukb-b-5779	ukb-b-5779	T	C	0.276349	-0.0186516	0.00338983	3.79997e-08	5	145615275	-0.0073	0.0194	482730	0.7067	0.2695	T	C	Parkinson's disease || id:ieu-b-7	ieu-b-7	Parkinson's disease	Parkinson's disease || ||	TRUE	igd
15	rs13390019	Alcohol intake frequency. || id:ukb-b-5779	ukb-b-5779	C	T	0.134041	0.0296116	0.00449182	4.30031e-11	2	97797680	-0.0146	0.026	482730	0.5758	0.1429	C	T	Parkinson's disease || id:ieu-b-7	ieu-b-7	Parkinson's disease	Parkinson's disease || ||	TRUE	igd
16	rs1421085	Alcohol intake frequency. || id:ukb-b-5779	ukb-b-5779	C	T	0.403447	0.0199392	0.00308481	1e-10	16	53800954	-0.0043	0.0171	482730	0.8017	0.4159	C	T	Parkinson's disease || id:ieu-b-7	ieu-b-7	Parkinson's disease	Parkinson's disease || ||	TRUE	igd
17	rs1515591	Alcohol intake frequency. || id:ukb-b-5779	ukb-b-5779	G	T	0.383186	0.0182303	0.00311635	4.90004e-09	3	174215120	0.0484	0.0228	468692	0.0337598	0.3879	G	T	Parkinson's disease || id:ieu-b-7	ieu-b-7	Parkinson's disease	Parkinson's disease || ||	TRUE	igd
18	rs1666658	Alcohol intake frequency. || id:ukb-b-5779	ukb-b-5779	C	T	0.392206	0.0179674	0.00309866	6.69993e-09	11	121801129	0.0105	0.0228	468692	0.6445	0.4022	C	T	Parkinson's disease || id:ieu-b-7	ieu-b-7	Parkinson's disease	Parkinson's disease || ||	TRUE	igd
19	rs17662759	Alcohol intake frequency. || id:ukb-b-5779	ukb-b-5779	C	T	0.089115	0.0301348	0.00546031	3.40001e-08	2	193989223	0.0657	0.0436	468692	0.1318	0.0907	C	T	Parkinson's disease || id:ieu-b-7	ieu-b-7	Parkinson's disease	Parkinson's disease || ||	TRUE	igd
20	rs17690703	Alcohol intake frequency. || id:ukb-b-5779	ukb-b-5779	T	C	0.262687	0.0250342	0.00343021	2.90001e-13	17	43925297	-0.2151	0.0244	480593	1.23112e-18	0.2524	T	C	Parkinson's disease || id:ieu-b-7	ieu-b-7	Parkinson's disease	Parkinson's disease || ||	TRUE	igd
21	rs186347	Alcohol intake frequency. || id:ukb-b-5779	ukb-b-5779	T	G	0.463343	0.0179489	0.00305071	4e-09	14	59072226	0.0134	0.0177	482730	0.4495	0.4776	T	G	Parkinson's disease || id:ieu-b-7	ieu-b-7	Parkinson's disease	Parkinson's disease || ||	TRUE	igd
22	rs1937522	Alcohol intake frequency. || id:ukb-b-5779	ukb-b-5779	G	A	0.528054	0.0168979	0.00303207	2.5e-08	13	68080817	-0.0013	0.0222	468692	0.9545	0.529	G	A	Parkinson's disease || id:ieu-b-7	ieu-b-7	Parkinson's disease	Parkinson's disease || ||	TRUE	igd
23	rs1991083	Alcohol intake frequency. || id:ukb-b-5779	ukb-b-5779	T	C	0.679886	-0.0223925	0.00325813	6.29941e-12	2	23887437	0.0565	0.0207	482730	0.00628507	0.6843	T	C	Parkinson's disease || id:ieu-b-7	ieu-b-7	Parkinson's disease	Parkinson's disease || ||	TRUE	igd
24	rs2043677	Alcohol intake frequency. || id:ukb-b-5779	ukb-b-5779	T	C	0.145599	0.0261133	0.0043272	1.6e-09	18	38313195	-0.0328	0.0311	469486	0.2929	0.1499	T	C	Parkinson's disease || id:ieu-b-7	ieu-b-7	Parkinson's disease	Parkinson's disease || ||	TRUE	igd
25	rs2159935	Alcohol intake frequency. || id:ukb-b-5779	ukb-b-5779	A	G	0.490369	-0.0185742	0.00302582	8.30004e-10	4	55521017	-0.0543	0.0221	468692	0.0141899	0.4858	A	G	Parkinson's disease || id:ieu-b-7	ieu-b-7	Parkinson's disease	Parkinson's disease || ||	TRUE	igd
26	rs2160935	Alcohol intake frequency. || id:ukb-b-5779	ukb-b-5779	T	C	0.604293	-0.018718	0.00309117	1.40001e-09	8	30840651	-0.005	0.02	482730	0.8038	0.6114	T	C	Parkinson's disease || id:ieu-b-7	ieu-b-7	Parkinson's disease	Parkinson's disease || ||	TRUE	igd
27	rs2244598	Alcohol intake frequency. || id:ukb-b-5779	ukb-b-5779	C	T	0.605114	-0.018378	0.00311907	3.79997e-09	1	216681000	0.0034	0.0237	468692	0.8852	0.6241	C	T	Parkinson's disease || id:ieu-b-7	ieu-b-7	Parkinson's disease	Parkinson's disease || ||	TRUE	igd
28	rs2411453	Alcohol intake frequency. || id:ukb-b-5779	ukb-b-5779	G	T	0.597353	-0.0350793	0.00309039	7.29962e-30	16	28632021	0.049	0.0185	482730	0.00810793	0.6185	G	T	Parkinson's disease || id:ieu-b-7	ieu-b-7	Parkinson's disease	Parkinson's disease || ||	TRUE	igd
29	rs2535911	Alcohol intake frequency. || id:ukb-b-5779	ukb-b-5779	T	C	0.354749	-0.0188476	0.00316849	2.69998e-09	14	73532676	-0.0091	0.019	482730	0.6326	0.3379	T	C	Parkinson's disease || id:ieu-b-7	ieu-b-7	Parkinson's disease	Parkinson's disease || ||	TRUE	igd
30	rs2622167	Alcohol intake frequency. || id:ukb-b-5779	ukb-b-5779	A	G	0.428653	-0.0191155	0.0030674	4.60002e-10	7	153486704	0.004	0.0192	482202	0.8335	0.4304	A	G	Parkinson's disease || id:ieu-b-7	ieu-b-7	Parkinson's disease	Parkinson's disease || ||	TRUE	igd
31	rs262240	Alcohol intake frequency. || id:ukb-b-5779	ukb-b-5779	T	C	0.468553	-0.017207	0.00303483	1.40001e-08	3	68408109	-0.0105	0.0223	468692	0.6384	0.4781	T	C	Parkinson's disease || id:ieu-b-7	ieu-b-7	Parkinson's disease	Parkinson's disease || ||	TRUE	igd
32	rs2717063	Alcohol intake frequency. || id:ukb-b-5779	ukb-b-5779	A	C	0.585731	-0.0203704	0.00308457	4.00037e-11	2	58110969	0.0151	0.0181	482730	0.4043	0.594	A	C	Parkinson's disease || id:ieu-b-7	ieu-b-7	Parkinson's disease	Parkinson's disease || ||	TRUE	igd
33	rs28768122	Alcohol intake frequency. || id:ukb-b-5779	ukb-b-5779	C	T	0.759525	0.0207	0.00355204	5.60003e-09	12	123885974	0.034	0.0196	482730	0.0825905	0.7559	C	T	Parkinson's disease || id:ieu-b-7	ieu-b-7	Parkinson's disease	Parkinson's disease || ||	TRUE	igd
34	rs28787109	Alcohol intake frequency. || id:ukb-b-5779	ukb-b-5779	A	G	0.40423	0.0178107	0.00308461	7.69999e-09	1	51220127	-0.0056	0.022	471013	0.8007	0.4289	A	G	Parkinson's disease || id:ieu-b-7	ieu-b-7	Parkinson's disease	Parkinson's disease || ||	TRUE	igd
35	rs2977454	Alcohol intake frequency. || id:ukb-b-5779	ukb-b-5779	G	C	0.124072	-0.0259222	0.00459853	1.7e-08	8	141539923	0.0513	0.0349	468692	0.1418	0.1195	G	C	Parkinson's disease || id:ieu-b-7	ieu-b-7	Parkinson's disease	Parkinson's disease || ||	TRUE	igd
36	rs34060476	Alcohol intake frequency. || id:ukb-b-5779	ukb-b-5779	G	A	0.133492	-0.0265116	0.00445363	2.59998e-09	7	73037956	0.0026	0.0271	480593	0.9241	0.1244	G	A	Parkinson's disease || id:ieu-b-7	ieu-b-7	Parkinson's disease	Parkinson's disease || ||	TRUE	igd
37	rs34440851	Alcohol intake frequency. || id:ukb-b-5779	ukb-b-5779	T	C	0.157151	-0.0226831	0.00415058	4.60002e-08	8	87214346	0.011	0.0254	482730	0.6659	0.1547	T	C	Parkinson's disease || id:ieu-b-7	ieu-b-7	Parkinson's disease	Parkinson's disease || ||	TRUE	igd
38	rs34473884	Alcohol intake frequency. || id:ukb-b-5779	ukb-b-5779	A	G	0.24819	-0.0203615	0.00350346	6.19998e-09	10	133761285	0.0501	0.0205	480593	0.0145301	0.237	A	G	Parkinson's disease || id:ieu-b-7	ieu-b-7	Parkinson's disease	Parkinson's disease || ||	TRUE	igd
39	rs34631026	Alcohol intake frequency. || id:ukb-b-5779	ukb-b-5779	T	C	0.446061	-0.0169128	0.00304832	2.90001e-08	16	6172126	-0.0597	0.0225	468692	0.00813992	0.4423	T	C	Parkinson's disease || id:ieu-b-7	ieu-b-7	Parkinson's disease	Parkinson's disease || ||	TRUE	igd
40	rs34811474	Alcohol intake frequency. || id:ukb-b-5779	ukb-b-5779	A	G	0.230728	-0.0201809	0.00359305	1.89998e-08	4	25408838	0.0547	0.0212	482730	0.009794	0.2198	A	G	Parkinson's disease || id:ieu-b-7	ieu-b-7	Parkinson's disease	Parkinson's disease || ||	TRUE	igd
41	rs35105141	Alcohol intake frequency. || id:ukb-b-5779	ukb-b-5779	T	C	0.401541	0.026345	0.00308788	1.39991e-17	16	30057148	-0.0337	0.018	482730	0.0607897	0.3844	T	C	Parkinson's disease || id:ieu-b-7	ieu-b-7	Parkinson's disease	Parkinson's disease || ||	TRUE	igd
42	rs362307	Alcohol intake frequency. || id:ukb-b-5779	ukb-b-5779	T	C	0.074582	0.0433047	0.00580219	8.4004e-14	4	3241845	0.0358	0.0385	482730	0.3528	0.0714	T	C	Parkinson's disease || id:ieu-b-7	ieu-b-7	Parkinson's disease	Parkinson's disease || ||	TRUE	igd
43	rs4241258	Alcohol intake frequency. || id:ukb-b-5779	ukb-b-5779	T	C	0.13763	0.0250636	0.00440325	1.29999e-08	2	74226102	-0.031	0.0287	482730	0.2797	0.1416	T	C	Parkinson's disease || id:ieu-b-7	ieu-b-7	Parkinson's disease	Parkinson's disease || ||	TRUE	igd
44	rs4242715	Alcohol intake frequency. || id:ukb-b-5779	ukb-b-5779	A	G	0.680585	-0.0186543	0.00324831	9.29994e-09	10	133986135	0.0119	0.0238	468692	0.6181	0.6687	A	G	Parkinson's disease || id:ieu-b-7	ieu-b-7	Parkinson's disease	Parkinson's disease || ||	TRUE	igd
45	rs4417025	Alcohol intake frequency. || id:ukb-b-5779	ukb-b-5779	A	G	0.361153	-0.0188379	0.00316516	2.69998e-09	1	35363679	-0.0003	0.0238	468692	0.9912	0.3402	A	G	Parkinson's disease || id:ieu-b-7	ieu-b-7	Parkinson's disease	Parkinson's disease || ||	TRUE	igd
46	rs4503294	Alcohol intake frequency. || id:ukb-b-5779	ukb-b-5779	T	C	0.565333	0.0181476	0.00307049	3.40001e-09	1	940096	-0.0149	0.0182	482730	0.4123	0.571	T	C	Parkinson's disease || id:ieu-b-7	ieu-b-7	Parkinson's disease	Parkinson's disease || ||	TRUE	igd
47	rs4726481	Alcohol intake frequency. || id:ukb-b-5779	ukb-b-5779	T	G	0.400576	0.0217614	0.00310188	2.29985e-12	7	141672604	-0.0089	0.0168	482730	0.5955	0.4582	T	G	Parkinson's disease || id:ieu-b-7	ieu-b-7	Parkinson's disease	Parkinson's disease || ||	TRUE	igd
48	rs473098	Alcohol intake frequency. || id:ukb-b-5779	ukb-b-5779	T	C	0.557689	-0.0217406	0.00304345	9.09913e-13	2	45139779	0.0144	0.0175	482730	0.412	0.5692	T	C	Parkinson's disease || id:ieu-b-7	ieu-b-7	Parkinson's disease	Parkinson's disease || ||	TRUE	igd
49	rs476828	Alcohol intake frequency. || id:ukb-b-5779	ukb-b-5779	C	T	0.237246	0.0216774	0.00355808	1.09999e-09	18	57852587	-0.001	0.0198	482730	0.9581	0.2362	C	T	Parkinson's disease || id:ieu-b-7	ieu-b-7	Parkinson's disease	Parkinson's disease || ||	TRUE	igd
50	rs489062	Alcohol intake frequency. || id:ukb-b-5779	ukb-b-5779	A	G	0.437454	0.0166498	0.00305291	4.90004e-08	10	99715744	-0.002	0.0203	482730	0.922	0.4307	A	G	Parkinson's disease || id:ieu-b-7	ieu-b-7	Parkinson's disease	Parkinson's disease || ||	TRUE	igd
51	rs4916723	Alcohol intake frequency. || id:ukb-b-5779	ukb-b-5779	C	A	0.420617	0.0239479	0.00309951	1.10002e-14	5	87896602	-0.0214	0.023	468692	0.3521	0.3749	C	A	Parkinson's disease || id:ieu-b-7	ieu-b-7	Parkinson's disease	Parkinson's disease || ||	TRUE	igd
52	rs4968391	Alcohol intake frequency. || id:ukb-b-5779	ukb-b-5779	T	G	0.674892	-0.0192695	0.0032265	2.30001e-09	17	57780943	-0.0154	0.0208	480593	0.46	0.6427	T	G	Parkinson's disease || id:ieu-b-7	ieu-b-7	Parkinson's disease	Parkinson's disease || ||	TRUE	igd
53	rs5022348	Alcohol intake frequency. || id:ukb-b-5779	ukb-b-5779	T	C	0.40703	0.0202641	0.00357005	1.40001e-08	18	22647270	0.0048	0.0227	468692	0.8341	0.581	T	C	Parkinson's disease || id:ieu-b-7	ieu-b-7	Parkinson's disease	Parkinson's disease || ||	TRUE	igd
54	rs550942	Alcohol intake frequency. || id:ukb-b-5779	ukb-b-5779	T	C	0.823865	0.022401	0.00398884	2e-08	11	58394154	-0.0303	0.0251	482730	0.227	0.8333	T	C	Parkinson's disease || id:ieu-b-7	ieu-b-7	Parkinson's disease	Parkinson's disease || ||	TRUE	igd
55	rs56194430	Alcohol intake frequency. || id:ukb-b-5779	ukb-b-5779	T	C	0.16931	0.0225403	0.00407148	3.09999e-08	5	67824690	0.0135	0.0308	468692	0.661601	0.1671	T	C	Parkinson's disease || id:ieu-b-7	ieu-b-7	Parkinson's disease	Parkinson's disease || ||	TRUE	igd
56	rs58905411	Alcohol intake frequency. || id:ukb-b-5779	ukb-b-5779	A	G	0.410052	-0.0266343	0.00307848	5.10035e-18	12	54623132	-0.0067	0.0198	482730	0.733701	0.4021	A	G	Parkinson's disease || id:ieu-b-7	ieu-b-7	Parkinson's disease	Parkinson's disease || ||	TRUE	igd
57	rs6030200	Alcohol intake frequency. || id:ukb-b-5779	ukb-b-5779	A	G	0.31415	-0.019529	0.00327075	2.39999e-09	20	35554361	-0.003	0.0196	482730	0.8787	0.3139	A	G	Parkinson's disease || id:ieu-b-7	ieu-b-7	Parkinson's disease	Parkinson's disease || ||	TRUE	igd
58	rs61873510	Alcohol intake frequency. || id:ukb-b-5779	ukb-b-5779	T	G	0.32785	0.0203737	0.00330311	6.90001e-10	10	102626510	-0.0201	0.0243	27693	0.408	0.3349	T	G	Parkinson's disease || id:ieu-b-7	ieu-b-7	Parkinson's disease	Parkinson's disease || ||	TRUE	igd
59	rs62305780	Alcohol intake frequency. || id:ukb-b-5779	ukb-b-5779	G	C	0.102253	-0.0485216	0.00506585	9.8992e-22	4	100290815	-0.0221	0.0316	482730	0.4845	0.0961	G	C	Parkinson's disease || id:ieu-b-7	ieu-b-7	Parkinson's disease	Parkinson's disease || ||	TRUE	igd
60	rs62339673	Alcohol intake frequency. || id:ukb-b-5779	ukb-b-5779	A	C	0.626705	0.0182943	0.00315406	6.59994e-09	4	184828533	-0.0026	0.0231	468692	0.9099	0.6179	A	C	Parkinson's disease || id:ieu-b-7	ieu-b-7	Parkinson's disease	Parkinson's disease || ||	TRUE	igd
61	rs650558	Alcohol intake frequency. || id:ukb-b-5779	ukb-b-5779	T	C	0.247918	0.0207362	0.0035079	3.40001e-09	17	40721042	-0.0661	0.0201	482730	0.00102499	0.2327	T	C	Parkinson's disease || id:ieu-b-7	ieu-b-7	Parkinson's disease	Parkinson's disease || ||	TRUE	igd
62	rs6727281	Alcohol intake frequency. || id:ukb-b-5779	ukb-b-5779	T	C	0.184023	-0.024322	0.00391964	5.49997e-10	2	65558588	0.0357	0.0284	471013	0.2096	0.1815	T	C	Parkinson's disease || id:ieu-b-7	ieu-b-7	Parkinson's disease	Parkinson's disease || ||	TRUE	igd
63	rs6943160	Alcohol intake frequency. || id:ukb-b-5779	ukb-b-5779	C	T	0.208646	0.020627	0.00372774	3.09999e-08	7	99872071	-0.0129	0.0219	482730	0.557	0.2114	C	T	Parkinson's disease || id:ieu-b-7	ieu-b-7	Parkinson's disease	Parkinson's disease || ||	TRUE	igd
64	rs72769229	Alcohol intake frequency. || id:ukb-b-5779	ukb-b-5779	T	A	0.154942	-0.0231352	0.00419154	3.40001e-08	2	2220795	-0.0041	0.0313	468692	0.8962	0.1493	T	A	Parkinson's disease || id:ieu-b-7	ieu-b-7	Parkinson's disease	Parkinson's disease || ||	TRUE	igd
65	rs72787062	Alcohol intake frequency. || id:ukb-b-5779	ukb-b-5779	A	G	0.162767	-0.0281947	0.00410324	6.4003e-12	16	72105844	-0.0067	0.0243	480593	0.7813	0.1592	A	G	Parkinson's disease || id:ieu-b-7	ieu-b-7	Parkinson's disease	Parkinson's disease || ||	TRUE	igd
66	rs728538	Alcohol intake frequency. || id:ukb-b-5779	ukb-b-5779	G	T	0.168868	0.0228752	0.00406259	1.79999e-08	16	51205819	-0.0184	0.0304	468692	0.5455	0.1734	G	T	Parkinson's disease || id:ieu-b-7	ieu-b-7	Parkinson's disease	Parkinson's disease || ||	TRUE	igd
67	rs7298932	Alcohol intake frequency. || id:ukb-b-5779	ukb-b-5779	G	A	0.147849	-0.0237214	0.00431166	3.79997e-08	12	23727301	-0.0359	0.0321	468692	0.2639	0.1452	G	A	Parkinson's disease || id:ieu-b-7	ieu-b-7	Parkinson's disease	Parkinson's disease || ||	TRUE	igd
68	rs7302200	Alcohol intake frequency. || id:ukb-b-5779	ukb-b-5779	A	G	0.339998	-0.0184222	0.00319841	8.40001e-09	12	56449435	0.0136	0.0187	482730	0.468	0.3312	A	G	Parkinson's disease || id:ieu-b-7	ieu-b-7	Parkinson's disease	Parkinson's disease || ||	TRUE	igd
69	rs73050128	Alcohol intake frequency. || id:ukb-b-5779	ukb-b-5779	A	C	0.164488	-0.0260048	0.00409088	2.1e-10	7	1962163	0.0113	0.0219	482730	0.6055	0.8111	C	A	Parkinson's disease || id:ieu-b-7	ieu-b-7	Parkinson's disease	Parkinson's disease || ||	TRUE	igd
70	rs7330939	Alcohol intake frequency. || id:ukb-b-5779	ukb-b-5779	T	C	0.720352	-0.0213301	0.0034046	3.69999e-10	13	49971400	0.0185	0.0192	482730	0.3355	0.7358	T	C	Parkinson's disease || id:ieu-b-7	ieu-b-7	Parkinson's disease	Parkinson's disease || ||	TRUE	igd
71	rs74679146	Alcohol intake frequency. || id:ukb-b-5779	ukb-b-5779	C	T	0.074515	-0.0320735	0.00575757	2.5e-08	9	16287769	0.0738	0.0443	468692	0.0960395	0.0716	C	T	Parkinson's disease || id:ieu-b-7	ieu-b-7	Parkinson's disease	Parkinson's disease || ||	TRUE	igd
72	rs76082653	Alcohol intake frequency. || id:ukb-b-5779	ukb-b-5779	T	C	0.054327	0.0464269	0.00668673	3.80014e-12	3	49029468	-0.14	0.0472	482730	0.00302197	0.0466	T	C	Parkinson's disease || id:ieu-b-7	ieu-b-7	Parkinson's disease	Parkinson's disease || ||	TRUE	igd
73	rs7610856	Alcohol intake frequency. || id:ukb-b-5779	ukb-b-5779	A	C	0.429053	-0.023864	0.00307022	7.70016e-15	3	71579022	0.0225	0.0227	468692	0.3229	0.4344	A	C	Parkinson's disease || id:ieu-b-7	ieu-b-7	Parkinson's disease	Parkinson's disease || ||	TRUE	igd
74	rs780094	Alcohol intake frequency. || id:ukb-b-5779	ukb-b-5779	C	T	0.615206	-0.0509938	0.00310506	1.29987e-60	2	27742603	0.0714	0.0173	482730	3.721e-05	0.5877	C	T	Parkinson's disease || id:ieu-b-7	ieu-b-7	Parkinson's disease	Parkinson's disease || ||	TRUE	igd
75	rs780569	Alcohol intake frequency. || id:ukb-b-5779	ukb-b-5779	A	T	0.70882	0.0198033	0.00336454	4e-09	1	4569436	0.0001	0.025	468692	0.9954	0.7222	A	T	Parkinson's disease || id:ieu-b-7	ieu-b-7	Parkinson's disease	Parkinson's disease || ||	TRUE	igd
76	rs8043563	Alcohol intake frequency. || id:ukb-b-5779	ukb-b-5779	C	G	0.737192	0.0233654	0.00347125	1.69981e-11	16	19982353	-0.0376	0.0258	468692	0.1454	0.7388	C	G	Parkinson's disease || id:ieu-b-7	ieu-b-7	Parkinson's disease	Parkinson's disease || ||	TRUE	igd
77	rs8614	Alcohol intake frequency. || id:ukb-b-5779	ukb-b-5779	A	C	0.182509	0.0247806	0.00392537	2.69998e-10	17	27588806	-0.0066	0.0259	482730	0.7984	0.1921	A	C	Parkinson's disease || id:ieu-b-7	ieu-b-7	Parkinson's disease	Parkinson's disease || ||	TRUE	igd
78	rs9349379	Alcohol intake frequency. || id:ukb-b-5779	ukb-b-5779	G	A	0.405493	-0.0193455	0.00308215	3.50002e-10	6	12903957	0.0027	0.0174	482730	0.8777	0.3983	G	A	Parkinson's disease || id:ieu-b-7	ieu-b-7	Parkinson's disease	Parkinson's disease || ||	TRUE	igd
79	rs9372625	Alcohol intake frequency. || id:ukb-b-5779	ukb-b-5779	A	G	0.381706	-0.0255579	0.00312467	2.90001e-16	6	98344031	0.0505	0.0229	468692	0.0275899	0.385	A	G	Parkinson's disease || id:ieu-b-7	ieu-b-7	Parkinson's disease	Parkinson's disease || ||	TRUE	igd
80	rs9403297	Alcohol intake frequency. || id:ukb-b-5779	ukb-b-5779	A	G	0.372967	0.0188234	0.00313037	1.79999e-09	6	141705482	-0.0466	0.018	482730	0.00941499	0.3881	A	G	Parkinson's disease || id:ieu-b-7	ieu-b-7	Parkinson's disease	Parkinson's disease || ||	TRUE	igd
81	rs9814516	Alcohol intake frequency. || id:ukb-b-5779	ukb-b-5779	T	G	0.237423	-0.0251117	0.00355589	1.59993e-12	3	85407980	0.0327	0.0222	482730	0.1396	0.2503	T	G	Parkinson's disease || id:ieu-b-7	ieu-b-7	Parkinson's disease	Parkinson's disease || ||	TRUE	igd
82	rs9829192	Alcohol intake frequency. || id:ukb-b-5779	ukb-b-5779	T	G	0.435133	0.0169324	0.00305032	2.80001e-08	3	38569463	0.0097	0.0176	482730	0.5806	0.4392	T	G	Parkinson's disease || id:ieu-b-7	ieu-b-7	Parkinson's disease	Parkinson's disease || ||	TRUE	igd
83	rs9906502	Alcohol intake frequency. || id:ukb-b-5779	ukb-b-5779	A	G	0.176998	0.0237883	0.00396178	1.89998e-09	17	7615745	-0.0138	0.0233	482730	0.554201	0.1783	A	G	Parkinson's disease || id:ieu-b-7	ieu-b-7	Parkinson's disease	Parkinson's disease || ||	TRUE	igd
1	rs1057868	Coffee intake || id:ukb-b-5237	ukb-b-5237	T	C	0.284986	0.0199509	0.00178517	5.40008e-29	7	75615006	0.0208	0.0194	480593	0.2827	0.2844	T	C	Parkinson's disease || id:ieu-b-7	ieu-b-7	Parkinson's disease	Parkinson's disease || ||	TRUE	igd
2	rs117968677	Coffee intake || id:ukb-b-5237	ukb-b-5237	A	G	0.024207	-0.0310299	0.00551601	1.89998e-08	15	75174251	-0.0057	0.0728	482730	0.9375	0.0231	A	G	Parkinson's disease || id:ieu-b-7	ieu-b-7	Parkinson's disease	Parkinson's disease || ||	TRUE	igd
3	rs12514566	Coffee intake || id:ukb-b-5237	ukb-b-5237	A	G	0.337107	-0.0113972	0.00170562	2.39994e-11	5	7391462	0.0082	0.0236	468692	0.728201	0.3429	A	G	Parkinson's disease || id:ieu-b-7	ieu-b-7	Parkinson's disease	Parkinson's disease || ||	TRUE	igd
4	rs13387939	Coffee intake || id:ukb-b-5237	ukb-b-5237	A	C	0.828363	0.0165558	0.0021386	9.79941e-15	2	637498	0.0142	0.0218	482730	0.516	0.8181	A	C	Parkinson's disease || id:ieu-b-7	ieu-b-7	Parkinson's disease	Parkinson's disease || ||	TRUE	igd
5	rs1421085	Coffee intake || id:ukb-b-5237	ukb-b-5237	C	T	0.40357	0.0185426	0.00164436	1.69981e-29	16	53800954	-0.0043	0.0171	482730	0.8017	0.4159	C	T	Parkinson's disease || id:ieu-b-7	ieu-b-7	Parkinson's disease	Parkinson's disease || ||	TRUE	igd
6	rs1942965	Coffee intake || id:ukb-b-5237	ukb-b-5237	C	T	0.504585	-0.00890339	0.00161917	3.79997e-08	18	55032486	-0.0157	0.0244	468692	0.5204	0.4952	C	T	Parkinson's disease || id:ieu-b-7	ieu-b-7	Parkinson's disease	Parkinson's disease || ||	TRUE	igd
7	rs2472297	Coffee intake || id:ukb-b-5237	ukb-b-5237	T	C	0.262883	0.0464708	0.00182733	1.09901e-142	15	75027880	0.0129	0.0204	482730	0.5277	0.2239	T	C	Parkinson's disease || id:ieu-b-7	ieu-b-7	Parkinson's disease	Parkinson's disease || ||	TRUE	igd
8	rs34060476	Coffee intake || id:ukb-b-5237	ukb-b-5237	G	A	0.133855	0.0184292	0.00237033	7.50067e-15	7	73037956	0.0026	0.0271	480593	0.9241	0.1244	G	A	Parkinson's disease || id:ieu-b-7	ieu-b-7	Parkinson's disease	Parkinson's disease || ||	TRUE	igd
9	rs4410790	Coffee intake || id:ukb-b-5237	ukb-b-5237	C	T	0.632141	0.039072	0.00167288	1.1995e-120	7	17284577	-0.0087	0.0173	482730	0.6123	0.6158	C	T	Parkinson's disease || id:ieu-b-7	ieu-b-7	Parkinson's disease	Parkinson's disease || ||	TRUE	igd
10	rs442355	Coffee intake || id:ukb-b-5237	ukb-b-5237	C	G	0.254435	-0.0111372	0.00185374	1.89998e-09	8	109128653	0.0195	0.0248	471013	0.4327	0.2547	C	G	Parkinson's disease || id:ieu-b-7	ieu-b-7	Parkinson's disease	Parkinson's disease || ||	TRUE	igd
11	rs4615895	Coffee intake || id:ukb-b-5237	ukb-b-5237	A	G	0.740926	0.0122025	0.00184972	4.19952e-11	1	96274668	0.0804	0.0255	468692	0.00160199	0.7412	A	G	Parkinson's disease || id:ieu-b-7	ieu-b-7	Parkinson's disease	Parkinson's disease || ||	TRUE	igd
12	rs476828	Coffee intake || id:ukb-b-5237	ukb-b-5237	C	T	0.237409	0.0173461	0.00189543	5.60015e-20	18	57852587	-0.001	0.0198	482730	0.9581	0.2362	C	T	Parkinson's disease || id:ieu-b-7	ieu-b-7	Parkinson's disease	Parkinson's disease || ||	TRUE	igd
13	rs516636	Coffee intake || id:ukb-b-5237	ukb-b-5237	A	C	0.208913	0.0116767	0.00198419	4e-09	1	177855517	-0.0215	0.0217	482730	0.3227	0.1871	A	C	Parkinson's disease || id:ieu-b-7	ieu-b-7	Parkinson's disease	Parkinson's disease || ||	TRUE	igd
14	rs56113850	Coffee intake || id:ukb-b-5237	ukb-b-5237	C	T	0.578109	0.0126667	0.00163351	8.9002e-15	19	41353107	0.0255	0.0202	482730	0.2056	0.5741	C	T	Parkinson's disease || id:ieu-b-7	ieu-b-7	Parkinson's disease	Parkinson's disease || ||	TRUE	igd
15	rs6063085	Coffee intake || id:ukb-b-5237	ukb-b-5237	C	A	0.373473	0.0104106	0.00166919	4.49997e-10	20	45840459	-0.0363	0.0231	468692	0.1153	0.3724	C	A	Parkinson's disease || id:ieu-b-7	ieu-b-7	Parkinson's disease	Parkinson's disease || ||	TRUE	igd
16	rs630194	Coffee intake || id:ukb-b-5237	ukb-b-5237	C	T	0.343374	-0.0113533	0.00169853	2.29985e-11	18	40950954	0.0514	0.02	482730	0.0101	0.3454	C	T	Parkinson's disease || id:ieu-b-7	ieu-b-7	Parkinson's disease	Parkinson's disease || ||	TRUE	igd
17	rs6469262	Coffee intake || id:ukb-b-5237	ukb-b-5237	C	T	0.564966	-0.00915347	0.00162895	1.89998e-08	8	110443480	0.0305	0.0178	480593	0.0867301	0.5546	C	T	Parkinson's disease || id:ieu-b-7	ieu-b-7	Parkinson's disease	Parkinson's disease || ||	TRUE	igd
18	rs73075167	Coffee intake || id:ukb-b-5237	ukb-b-5237	T	A	0.12918	-0.0160639	0.00244429	5.00035e-11	7	17570479	0.0519	0.0345	468692	0.1317	0.1273	T	A	Parkinson's disease || id:ieu-b-7	ieu-b-7	Parkinson's disease	Parkinson's disease || ||	TRUE	igd
19	rs780094	Coffee intake || id:ukb-b-5237	ukb-b-5237	C	T	0.615852	0.0131075	0.00165692	2.60016e-15	2	27742603	0.0714	0.0173	482730	3.721e-05	0.5877	C	T	Parkinson's disease || id:ieu-b-7	ieu-b-7	Parkinson's disease	Parkinson's disease || ||	TRUE	igd
20	rs7811609	Coffee intake || id:ukb-b-5237	ukb-b-5237	T	C	0.374746	0.00913864	0.00166468	4e-08	7	32930597	-0.0392	0.023	468692	0.0885095	0.3781	T	C	Parkinson's disease || id:ieu-b-7	ieu-b-7	Parkinson's disease	Parkinson's disease || ||	TRUE	igd
21	rs78267637	Coffee intake || id:ukb-b-5237	ukb-b-5237	G	C	0.038115	-0.0254259	0.00431659	3.89996e-09	8	33790200	0.0721	0.0638	468692	0.2587	0.0352	G	C	Parkinson's disease || id:ieu-b-7	ieu-b-7	Parkinson's disease	Parkinson's disease || ||	TRUE	igd
22	rs9398171	Coffee intake || id:ukb-b-5237	ukb-b-5237	T	C	0.71064	0.0108577	0.00177995	1.09999e-09	6	108983527	-0.0083	0.0184	482730	0.653699	0.6911	T	C	Parkinson's disease || id:ieu-b-7	ieu-b-7	Parkinson's disease	Parkinson's disease || ||	TRUE	igd
23	rs977474	Coffee intake || id:ukb-b-5237	ukb-b-5237	T	C	0.833252	-0.014609	0.00217277	1.80011e-11	12	11293130	-0.0372	0.0241	480593	0.1226	0.8437	C	T	Parkinson's disease || id:ieu-b-7	ieu-b-7	Parkinson's disease	Parkinson's disease || ||	TRUE	igd
1	rs1057868	Tea intake || id:ukb-b-6066	ukb-b-6066	T	C	0.284682	0.0227012	0.00234389	3.50026e-22	7	75615006	0.0208	0.0194	480593	0.2827	0.2844	T	C	Parkinson's disease || id:ieu-b-7	ieu-b-7	Parkinson's disease	Parkinson's disease || ||	TRUE	igd
2	rs10741694	Tea intake || id:ukb-b-6066	ukb-b-6066	C	T	0.627915	0.0150037	0.00219355	7.89951e-12	11	16286183	0.0097	0.018	482730	0.589599	0.6248	C	T	Parkinson's disease || id:ieu-b-7	ieu-b-7	Parkinson's disease	Parkinson's disease || ||	TRUE	igd
3	rs10752269	Tea intake || id:ukb-b-6066	ukb-b-6066	A	G	0.506082	-0.0128727	0.00211975	1.29999e-09	10	12692902	0.0232	0.018	482730	0.1975	0.5055	A	G	Parkinson's disease || id:ieu-b-7	ieu-b-7	Parkinson's disease	Parkinson's disease || ||	TRUE	igd
4	rs11587444	Tea intake || id:ukb-b-6066	ukb-b-6066	G	A	0.393464	0.0140328	0.00217078	1e-10	1	150722844	-0.0365	0.0172	482730	0.0336698	0.3974	G	A	Parkinson's disease || id:ieu-b-7	ieu-b-7	Parkinson's disease	Parkinson's disease || ||	TRUE	igd
5	rs12591786	Tea intake || id:ukb-b-6066	ukb-b-6066	T	C	0.158804	-0.0184399	0.00294243	3.69999e-10	15	60902512	-0.0052	0.0267	482730	0.8458	0.1603	T	C	Parkinson's disease || id:ieu-b-7	ieu-b-7	Parkinson's disease	Parkinson's disease || ||	TRUE	igd
6	rs132904	Tea intake || id:ukb-b-6066	ukb-b-6066	C	G	0.778651	0.0166007	0.00255257	7.8001e-11	22	41798896	0.0626	0.0208	482730	0.00256702	0.7776	C	G	Parkinson's disease || id:ieu-b-7	ieu-b-7	Parkinson's disease	Parkinson's disease || ||	TRUE	igd
7	rs1421085	Tea intake || id:ukb-b-6066	ukb-b-6066	C	T	0.403272	-0.0128382	0.00215888	2.69998e-09	16	53800954	-0.0043	0.0171	482730	0.8017	0.4159	C	T	Parkinson's disease || id:ieu-b-7	ieu-b-7	Parkinson's disease	Parkinson's disease || ||	TRUE	igd
8	rs1453548	Tea intake || id:ukb-b-6066	ukb-b-6066	A	T	0.664929	-0.0133414	0.00224973	2.99999e-09	11	59192089	0.0225	0.018	482730	0.2113	0.6693	A	T	Parkinson's disease || id:ieu-b-7	ieu-b-7	Parkinson's disease	Parkinson's disease || ||	TRUE	igd
9	rs1481012	Tea intake || id:ukb-b-6066	ukb-b-6066	G	A	0.112209	-0.0262435	0.00335608	5.30029e-15	4	89039082	-0.0547	0.0306	482730	0.0731695	0.1044	G	A	Parkinson's disease || id:ieu-b-7	ieu-b-7	Parkinson's disease	Parkinson's disease || ||	TRUE	igd
10	rs17245213	Tea intake || id:ukb-b-6066	ukb-b-6066	A	G	0.208046	-0.0146481	0.00260905	2e-08	11	1679769	0.0119	0.0232	482730	0.6065	0.22	A	G	Parkinson's disease || id:ieu-b-7	ieu-b-7	Parkinson's disease	Parkinson's disease || ||	TRUE	igd
11	rs17576658	Tea intake || id:ukb-b-6066	ukb-b-6066	A	G	0.247081	-0.0134812	0.00245655	4.09996e-08	13	100272019	0.0057	0.0263	468692	0.8282	0.2607	A	G	Parkinson's disease || id:ieu-b-7	ieu-b-7	Parkinson's disease	Parkinson's disease || ||	TRUE	igd
12	rs2273447	Tea intake || id:ukb-b-6066	ukb-b-6066	T	A	0.203788	0.0174715	0.00263421	3.29989e-11	20	62900120	-0.0102	0.0298	468692	0.7317	0.1949	T	A	Parkinson's disease || id:ieu-b-7	ieu-b-7	Parkinson's disease	Parkinson's disease || ||	TRUE	igd
13	rs2351187	Tea intake || id:ukb-b-6066	ukb-b-6066	A	G	0.318935	0.0129023	0.0022823	1.6e-08	10	86850616	0.0136	0.0242	468692	0.5749	0.3048	A	G	Parkinson's disease || id:ieu-b-7	ieu-b-7	Parkinson's disease	Parkinson's disease || ||	TRUE	igd
14	rs2472297	Tea intake || id:ukb-b-6066	ukb-b-6066	T	C	0.262049	0.0533453	0.00240098	2.30144e-109	15	75027880	0.0129	0.0204	482730	0.5277	0.2239	T	C	Parkinson's disease || id:ieu-b-7	ieu-b-7	Parkinson's disease	Parkinson's disease || ||	TRUE	igd
15	rs2478875	Tea intake || id:ukb-b-6066	ukb-b-6066	G	A	0.208758	0.0218943	0.00261129	5.10035e-17	6	51283110	0.0507	0.0226	482730	0.0252	0.213	G	A	Parkinson's disease || id:ieu-b-7	ieu-b-7	Parkinson's disease	Parkinson's disease || ||	TRUE	igd
16	rs4410790	Tea intake || id:ukb-b-6066	ukb-b-6066	C	T	0.631224	0.0405506	0.00219507	3.40017e-76	7	17284577	-0.0087	0.0173	482730	0.6123	0.6158	C	T	Parkinson's disease || id:ieu-b-7	ieu-b-7	Parkinson's disease	Parkinson's disease || ||	TRUE	igd
17	rs4726481	Tea intake || id:ukb-b-6066	ukb-b-6066	T	G	0.400743	0.0134268	0.00216931	5.99998e-10	7	141672604	-0.0089	0.0168	482730	0.5955	0.4582	T	G	Parkinson's disease || id:ieu-b-7	ieu-b-7	Parkinson's disease	Parkinson's disease || ||	TRUE	igd
18	rs4808193	Tea intake || id:ukb-b-6066	ukb-b-6066	C	T	0.335324	0.0151149	0.0022472	1.69981e-11	19	19410622	0.0008	0.0193	482730	0.9655	0.3405	C	T	Parkinson's disease || id:ieu-b-7	ieu-b-7	Parkinson's disease	Parkinson's disease || ||	TRUE	igd
19	rs4817505	Tea intake || id:ukb-b-6066	ukb-b-6066	C	T	0.38998	0.015068	0.0021746	4.19952e-12	21	34343828	-0.0057	0.0257	466555	0.8241	0.3808	C	T	Parkinson's disease || id:ieu-b-7	ieu-b-7	Parkinson's disease	Parkinson's disease || ||	TRUE	igd
20	rs56188862	Tea intake || id:ukb-b-6066	ukb-b-6066	C	T	0.387454	-0.0157568	0.0021747	4.30031e-13	1	174189269	-0.0084	0.0185	482730	0.6495	0.3892	C	T	Parkinson's disease || id:ieu-b-7	ieu-b-7	Parkinson's disease	Parkinson's disease || ||	TRUE	igd
21	rs56348300	Tea intake || id:ukb-b-6066	ukb-b-6066	G	C	0.184619	0.0158824	0.00273191	6.1e-09	9	7054124	-0.0181	0.0223	482730	0.4185	0.1767	G	C	Parkinson's disease || id:ieu-b-7	ieu-b-7	Parkinson's disease	Parkinson's disease || ||	TRUE	igd
22	rs57462170	Tea intake || id:ukb-b-6066	ukb-b-6066	A	G	0.108773	0.0191505	0.00340563	1.89998e-08	3	50239803	0.0333	0.0276	482730	0.2273	0.105	A	G	Parkinson's disease || id:ieu-b-7	ieu-b-7	Parkinson's disease	Parkinson's disease || ||	TRUE	igd
23	rs57631352	Tea intake || id:ukb-b-6066	ukb-b-6066	G	A	0.296859	-0.0131035	0.00232117	1.7e-08	19	4338173	0.0063	0.0242	468692	0.7955	0.299	G	A	Parkinson's disease || id:ieu-b-7	ieu-b-7	Parkinson's disease	Parkinson's disease || ||	TRUE	igd
24	rs6829	Tea intake || id:ukb-b-6066	ukb-b-6066	T	C	0.596155	-0.0119163	0.00216546	3.69999e-08	13	111531264	0.0001	0.023	468692	0.9981	0.5972	T	C	Parkinson's disease || id:ieu-b-7	ieu-b-7	Parkinson's disease	Parkinson's disease || ||	TRUE	igd
25	rs72797284	Tea intake || id:ukb-b-6066	ukb-b-6066	G	A	0.270797	-0.0171147	0.00238353	7.00003e-13	5	152031650	-0.0077	0.0219	482730	0.7248	0.2599	G	A	Parkinson's disease || id:ieu-b-7	ieu-b-7	Parkinson's disease	Parkinson's disease || ||	TRUE	igd
26	rs73075167	Tea intake || id:ukb-b-6066	ukb-b-6066	T	A	0.129407	-0.0182294	0.00320608	1.29999e-08	7	17570479	0.0519	0.0345	468692	0.1317	0.1273	T	A	Parkinson's disease || id:ieu-b-7	ieu-b-7	Parkinson's disease	Parkinson's disease || ||	TRUE	igd
27	rs7757102	Tea intake || id:ukb-b-6066	ukb-b-6066	G	A	0.555426	-0.0118039	0.00213302	3.09999e-08	6	137222671	-0.013	0.0189	482730	0.4903	0.5566	G	A	Parkinson's disease || id:ieu-b-7	ieu-b-7	Parkinson's disease	Parkinson's disease || ||	TRUE	igd
28	rs9624470	Tea intake || id:ukb-b-6066	ukb-b-6066	A	G	0.580054	0.0252071	0.00215485	1.29987e-31	22	24820268	0.0394	0.0177	482730	0.0262102	0.5768	A	G	Parkinson's disease || id:ieu-b-7	ieu-b-7	Parkinson's disease	Parkinson's disease || ||	TRUE	igd
29	rs9648476	Tea intake || id:ukb-b-6066	ukb-b-6066	A	G	0.622954	0.0125013	0.00218542	1.09999e-08	7	39293033	-0.0029	0.023	468692	0.8981	0.6265	A	G	Parkinson's disease || id:ieu-b-7	ieu-b-7	Parkinson's disease	Parkinson's disease || ||	TRUE	igd
30	rs977474	Tea intake || id:ukb-b-6066	ukb-b-6066	T	C	0.833746	0.0217813	0.00285559	2.39994e-14	12	11293130	-0.0372	0.0241	480593	0.1226	0.8437	C	T	Parkinson's disease || id:ieu-b-7	ieu-b-7	Parkinson's disease	Parkinson's disease || ||	TRUE	igd

## Sheet: Sleep on PD
The information of the SNPs used as IVs for the sleep phenotypes.
exposure	NO	SNP	effect_allele.exposure	other_allele.exposure	effect_allele.outcome	other_allele.outcome	beta.exposure	beta.outcome	eaf.exposure	eaf.outcome	remove	palindromic	ambiguous	id.outcome	chr	pos	se.outcome	samplesize.outcome	pval.outcome	outcome	originalname.outcome	outcome.deprecated	mr_keep.outcome	data_source.outcome	se.exposure	exposure	mr_keep.exposure	pval.exposure	pval_origin.exposure	id.exposure	data_source.exposure	action	SNP_index	mr_keep	proxy.outcome	target_snp.outcome	proxy_snp.outcome	target_a1.outcome	target_a2.outcome	proxy_a1.outcome	proxy_a2.outcome	R2	F
Chronotype	1	rs10058356	T	C	T	C	-0.017	-0.024	0.696	0.6882	FALSE	FALSE	FALSE	ieu-b-7	5	35220404	0.0241	468692	0.3207	Parkinson's disease || id:ieu-b-7	Parkinson's disease	Parkinson's disease || ||	TRUE	igd	0.003	Chronotype	TRUE	1.45602e-08	inferred	s6K7cB	textfile	2	1	TRUE	NA	NA	NA	NA	NA	NA	NA
Chronotype	2	rs10175975	T	C	T	C	0.023	0.0379	0.185	0.1829	FALSE	FALSE	FALSE	ieu-b-7	2	59429807	0.0289	468692	0.1902	Parkinson's disease || id:ieu-b-7	Parkinson's disease	Parkinson's disease || ||	TRUE	igd	0.004	Chronotype	TRUE	8.92434e-09	inferred	s6K7cB	textfile	2	1	TRUE	NA	NA	NA	NA	NA	NA	NA
Chronotype	3	rs10237162	T	C	T	C	0.018	0.0273	0.723	0.7222	FALSE	FALSE	FALSE	ieu-b-7	7	24085405	0.025	468692	0.2759	Parkinson's disease || id:ieu-b-7	Parkinson's disease	Parkinson's disease || ||	TRUE	igd	0.003	Chronotype	TRUE	1.97318e-09	inferred	s6K7cB	textfile	2	1	TRUE	NA	NA	NA	NA	NA	NA	NA
Chronotype	4	rs10254050	C	G	C	G	-0.025	-0.009	0.191	0.1999	FALSE	TRUE	FALSE	ieu-b-7	7	96468077	0.0281	468692	0.7489	Parkinson's disease || id:ieu-b-7	Parkinson's disease	Parkinson's disease || ||	TRUE	igd	0.003	Chronotype	TRUE	7.85975e-17	inferred	s6K7cB	textfile	2	1	TRUE	NA	NA	NA	NA	NA	NA	NA
Chronotype	5	rs10402849	T	C	T	C	0.019	0.0764	0.2	0.2073	FALSE	FALSE	FALSE	ieu-b-7	19	2695661	0.0277	468692	0.00573297	Parkinson's disease || id:ieu-b-7	Parkinson's disease	Parkinson's disease || ||	TRUE	igd	0.003	Chronotype	TRUE	2.3992e-10	inferred	s6K7cB	textfile	2	1	TRUE	NA	NA	NA	NA	NA	NA	NA
Chronotype	6	rs10520176	T	C	T	C	0.023	0.0202	0.493	0.4839	FALSE	FALSE	FALSE	ieu-b-7	2	77217310	0.0226	468692	0.3733	Parkinson's disease || id:ieu-b-7	Parkinson's disease	Parkinson's disease || ||	TRUE	igd	0.003	Chronotype	TRUE	1.76524e-14	inferred	s6K7cB	textfile	2	1	TRUE	NA	NA	NA	NA	NA	NA	NA
Chronotype	7	rs1061032	T	G	T	G	0.039	0.0119	0.094	0.091	FALSE	FALSE	FALSE	ieu-b-7	17	8080409	0.0306	482730	0.698601	Parkinson's disease || id:ieu-b-7	Parkinson's disease	Parkinson's disease || ||	TRUE	igd	0.005	Chronotype	TRUE	6.19072e-15	inferred	s6K7cB	textfile	2	1	TRUE	TRUE	rs1061032	rs6503090	T	G	A	G
Chronotype	8	rs10742179	A	G	A	G	0.018	0.0083	0.263	0.272	FALSE	FALSE	FALSE	ieu-b-7	11	27650524	0.019	482730	0.661301	Parkinson's disease || id:ieu-b-7	Parkinson's disease	Parkinson's disease || ||	TRUE	igd	0.003	Chronotype	TRUE	1.97318e-09	inferred	s6K7cB	textfile	2	1	TRUE	NA	NA	NA	NA	NA	NA	NA
Chronotype	9	rs10818834	T	C	T	C	0.019	-0.0347	0.73	0.7293	FALSE	FALSE	FALSE	ieu-b-7	9	126317324	0.0224	482730	0.121	Parkinson's disease || id:ieu-b-7	Parkinson's disease	Parkinson's disease || ||	TRUE	igd	0.003	Chronotype	TRUE	2.3992e-10	inferred	s6K7cB	textfile	2	1	TRUE	NA	NA	NA	NA	NA	NA	NA
Chronotype	10	rs10832648	A	C	A	C	-0.02	-0.0309	0.199	0.207	FALSE	FALSE	FALSE	ieu-b-7	11	16618307	0.0276	469220	0.2634	Parkinson's disease || id:ieu-b-7	Parkinson's disease	Parkinson's disease || ||	TRUE	igd	0.003	Chronotype	TRUE	2.61678e-11	inferred	s6K7cB	textfile	2	1	TRUE	NA	NA	NA	NA	NA	NA	NA
Chronotype	11	rs10916892	T	C	T	C	-0.02	0.0572	0.62	0.6178	FALSE	FALSE	FALSE	ieu-b-7	1	21201325	0.023	469691	0.0130701	Parkinson's disease || id:ieu-b-7	Parkinson's disease	Parkinson's disease || ||	TRUE	igd	0.003	Chronotype	TRUE	2.61678e-11	inferred	s6K7cB	textfile	2	1	TRUE	NA	NA	NA	NA	NA	NA	NA
Chronotype	12	rs10951325	T	C	T	C	0.021	-0.0075	0.632	0.6358	FALSE	FALSE	FALSE	ieu-b-7	7	32265545	0.0191	482730	0.695601	Parkinson's disease || id:ieu-b-7	Parkinson's disease	Parkinson's disease || ||	TRUE	igd	0.003	Chronotype	TRUE	2.55963e-12	inferred	s6K7cB	textfile	2	1	TRUE	NA	NA	NA	NA	NA	NA	NA
Chronotype	13	rs11032362	A	G	A	G	0.04	0.003	0.094	0.1017	FALSE	FALSE	FALSE	ieu-b-7	11	33759092	0.0294	482730	0.9198	Parkinson's disease || id:ieu-b-7	Parkinson's disease	Parkinson's disease || ||	TRUE	igd	0.005	Chronotype	TRUE	1.24419e-15	inferred	s6K7cB	textfile	2	1	TRUE	NA	NA	NA	NA	NA	NA	NA
Chronotype	14	rs11152350	A	C	A	C	-0.016	-0.0194	0.467	0.4672	FALSE	FALSE	FALSE	ieu-b-7	18	60240352	0.0221	468692	0.3815	Parkinson's disease || id:ieu-b-7	Parkinson's disease	Parkinson's disease || ||	TRUE	igd	0.003	Chronotype	TRUE	9.64261e-08	inferred	s6K7cB	textfile	2	1	TRUE	NA	NA	NA	NA	NA	NA	NA
Chronotype	15	rs113851554	T	G	T	G	-0.036	-0.0295	0.057	0.0549	FALSE	FALSE	FALSE	ieu-b-7	2	66750564	0.0522	468692	0.5718	Parkinson's disease || id:ieu-b-7	Parkinson's disease	Parkinson's disease || ||	TRUE	igd	0.006	Chronotype	TRUE	1.97318e-09	inferred	s6K7cB	textfile	2	1	TRUE	NA	NA	NA	NA	NA	NA	NA
Chronotype	16	rs1144566	T	C	T	C	0.113	-0.0273	0.029	0.028	FALSE	FALSE	FALSE	ieu-b-7	1	182569626	0.0516	482730	0.5963	Parkinson's disease || id:ieu-b-7	Parkinson's disease	Parkinson's disease || ||	TRUE	igd	0.008	Chronotype	TRUE	2.664e-45	inferred	s6K7cB	textfile	2	1	TRUE	NA	NA	NA	NA	NA	NA	NA
Chronotype	17	rs114848860	A	T	A	T	-0.056	-0.0716	0.974	0.9754	FALSE	TRUE	FALSE	ieu-b-7	3	36859494	0.0666	482730	0.2822	Parkinson's disease || id:ieu-b-7	Parkinson's disease	Parkinson's disease || ||	TRUE	igd	0.009	Chronotype	TRUE	4.90162e-10	inferred	s6K7cB	textfile	2	1	TRUE	NA	NA	NA	NA	NA	NA	NA
Chronotype	18	rs11545787	A	G	A	G	-0.024	-0.0107	0.248	0.231	FALSE	FALSE	FALSE	ieu-b-7	17	17398278	0.0245	480593	0.663201	Parkinson's disease || id:ieu-b-7	Parkinson's disease	Parkinson's disease || ||	TRUE	igd	0.003	Chronotype	TRUE	1.24419e-15	inferred	s6K7cB	textfile	2	1	TRUE	NA	NA	NA	NA	NA	NA	NA
Chronotype	19	rs11588913	A	G	A	G	-0.015	0.0185	0.404	0.4225	FALSE	FALSE	FALSE	ieu-b-7	1	79963816	0.0225	468692	0.4096	Parkinson's disease || id:ieu-b-7	Parkinson's disease	Parkinson's disease || ||	TRUE	igd	0.003	Chronotype	TRUE	5.73303e-07	inferred	s6K7cB	textfile	2	1	TRUE	NA	NA	NA	NA	NA	NA	NA
Chronotype	20	rs11641239	T	C	T	C	0.017	0.0167	0.285	0.2783	FALSE	FALSE	FALSE	ieu-b-7	16	23124193	0.0199	482730	0.401	Parkinson's disease || id:ieu-b-7	Parkinson's disease	Parkinson's disease || ||	TRUE	igd	0.003	Chronotype	TRUE	1.45602e-08	inferred	s6K7cB	textfile	2	1	TRUE	NA	NA	NA	NA	NA	NA	NA
Chronotype	21	rs11670534	T	C	T	C	-0.021	-0.0021	0.161	0.1569	FALSE	FALSE	FALSE	ieu-b-7	19	47003906	0.0234	482730	0.9292	Parkinson's disease || id:ieu-b-7	Parkinson's disease	Parkinson's disease || ||	TRUE	igd	0.004	Chronotype	TRUE	1.52099e-07	inferred	s6K7cB	textfile	2	1	TRUE	NA	NA	NA	NA	NA	NA	NA
Chronotype	22	rs11677484	T	G	T	G	0.019	0.0391	0.257	0.2637	FALSE	FALSE	FALSE	ieu-b-7	2	191578172	0.0253	468692	0.1223	Parkinson's disease || id:ieu-b-7	Parkinson's disease	Parkinson's disease || ||	TRUE	igd	0.003	Chronotype	TRUE	2.3992e-10	inferred	s6K7cB	textfile	2	1	TRUE	NA	NA	NA	NA	NA	NA	NA
Chronotype	23	rs12040629	A	G	A	G	0.039	0.0257	0.16	0.1598	FALSE	FALSE	FALSE	ieu-b-7	1	77705365	0.0303	468692	0.3961	Parkinson's disease || id:ieu-b-7	Parkinson's disease	Parkinson's disease || ||	TRUE	igd	0.004	Chronotype	TRUE	1.84468e-22	inferred	s6K7cB	textfile	2	1	TRUE	NA	NA	NA	NA	NA	NA	NA
Chronotype	24	rs12140153	T	G	T	G	-0.034	-0.0395	0.089	0.0821	FALSE	FALSE	FALSE	ieu-b-7	1	62579891	0.0314	482730	0.2082	Parkinson's disease || id:ieu-b-7	Parkinson's disease	Parkinson's disease || ||	TRUE	igd	0.005	Chronotype	TRUE	1.04619e-11	inferred	s6K7cB	textfile	2	1	TRUE	NA	NA	NA	NA	NA	NA	NA
Chronotype	25	rs12298405	T	C	T	C	-0.016	0.0403	0.33	0.3406	FALSE	FALSE	FALSE	ieu-b-7	12	17015267	0.0179	482730	0.0241102	Parkinson's disease || id:ieu-b-7	Parkinson's disease	Parkinson's disease || ||	TRUE	igd	0.003	Chronotype	TRUE	9.64261e-08	inferred	s6K7cB	textfile	2	1	TRUE	NA	NA	NA	NA	NA	NA	NA
Chronotype	26	rs12470914	A	T	A	T	0.026	-0.0186	0.101	0.1023	FALSE	TRUE	FALSE	ieu-b-7	2	50532840	0.0311	482730	0.550399	Parkinson's disease || id:ieu-b-7	Parkinson's disease	Parkinson's disease || ||	TRUE	igd	0.004	Chronotype	TRUE	8.032e-11	inferred	s6K7cB	textfile	2	1	TRUE	NA	NA	NA	NA	NA	NA	NA
Chronotype	27	rs12636669	T	C	T	C	0.034	0.0053	0.08	0.0696	FALSE	FALSE	FALSE	ieu-b-7	3	50003323	0.0368	27693	0.8861	Parkinson's disease || id:ieu-b-7	Parkinson's disease	Parkinson's disease || ||	TRUE	igd	0.005	Chronotype	TRUE	1.04619e-11	inferred	s6K7cB	textfile	2	1	TRUE	NA	NA	NA	NA	NA	NA	NA
Chronotype	28	rs12808544	A	C	A	C	-0.021	-0.0423	0.241	0.2434	FALSE	FALSE	FALSE	ieu-b-7	11	58373221	0.0212	482730	0.0461296	Parkinson's disease || id:ieu-b-7	Parkinson's disease	Parkinson's disease || ||	TRUE	igd	0.003	Chronotype	TRUE	2.55963e-12	inferred	s6K7cB	textfile	2	1	TRUE	NA	NA	NA	NA	NA	NA	NA
Chronotype	29	rs12927162	A	G	A	G	0.029	-0.0063	0.728	0.7286	FALSE	FALSE	FALSE	ieu-b-7	16	52684916	0.0263	468692	0.8113	Parkinson's disease || id:ieu-b-7	Parkinson's disease	Parkinson's disease || ||	TRUE	igd	0.003	Chronotype	TRUE	4.17764e-22	inferred	s6K7cB	textfile	2	1	TRUE	NA	NA	NA	NA	NA	NA	NA
Chronotype	30	rs12969848	T	C	T	C	0.022	-0.0013	0.531	0.5384	FALSE	FALSE	FALSE	ieu-b-7	18	38152835	0.0201	482730	0.9473	Parkinson's disease || id:ieu-b-7	Parkinson's disease	Parkinson's disease || ||	TRUE	igd	0.003	Chronotype	TRUE	2.24498e-13	inferred	s6K7cB	textfile	2	1	TRUE	NA	NA	NA	NA	NA	NA	NA
Chronotype	31	rs13011556	C	G	C	G	-0.023	0.0118	0.762	0.7663	FALSE	TRUE	FALSE	ieu-b-7	2	4651923	0.0267	468692	0.6586	Parkinson's disease || id:ieu-b-7	Parkinson's disease	Parkinson's disease || ||	TRUE	igd	0.003	Chronotype	TRUE	1.76524e-14	inferred	s6K7cB	textfile	2	1	TRUE	NA	NA	NA	NA	NA	NA	NA
Chronotype	32	rs13065394	T	G	T	G	-0.018	-0.0057	0.286	0.2818	FALSE	FALSE	FALSE	ieu-b-7	3	132971327	0.0248	468692	0.8182	Parkinson's disease || id:ieu-b-7	Parkinson's disease	Parkinson's disease || ||	TRUE	igd	0.003	Chronotype	TRUE	1.97318e-09	inferred	s6K7cB	textfile	2	1	TRUE	NA	NA	NA	NA	NA	NA	NA
Chronotype	33	rs13377754	T	C	T	C	0.03	0.0006	0.61	0.6045	FALSE	FALSE	FALSE	ieu-b-7	12	34051765	0.0193	482730	0.9761	Parkinson's disease || id:ieu-b-7	Parkinson's disease	Parkinson's disease || ||	TRUE	igd	0.003	Chronotype	TRUE	1.52397e-23	inferred	s6K7cB	textfile	2	1	TRUE	NA	NA	NA	NA	NA	NA	NA
Chronotype	34	rs139911	T	C	T	C	-0.023	-0.006	0.572	0.5629	FALSE	FALSE	FALSE	ieu-b-7	22	40704052	0.0176	482730	0.7323	Parkinson's disease || id:ieu-b-7	Parkinson's disease	Parkinson's disease || ||	TRUE	igd	0.003	Chronotype	TRUE	1.76524e-14	inferred	s6K7cB	textfile	2	1	TRUE	NA	NA	NA	NA	NA	NA	NA
Chronotype	35	rs1421085	T	C	T	C	-0.028	0.0043	0.594	0.5841	FALSE	FALSE	FALSE	ieu-b-7	16	53800954	0.0171	482730	0.8017	Parkinson's disease || id:ieu-b-7	Parkinson's disease	Parkinson's disease || ||	TRUE	igd	0.003	Chronotype	TRUE	1.02593e-20	inferred	s6K7cB	textfile	2	1	TRUE	NA	NA	NA	NA	NA	NA	NA
Chronotype	36	rs1468945	A	G	A	G	-0.023	0.0075	0.785	0.7792	FALSE	FALSE	FALSE	ieu-b-7	3	185990392	0.0202	482730	0.710201	Parkinson's disease || id:ieu-b-7	Parkinson's disease	Parkinson's disease || ||	TRUE	igd	0.003	Chronotype	TRUE	1.76524e-14	inferred	s6K7cB	textfile	2	1	TRUE	NA	NA	NA	NA	NA	NA	NA
Chronotype	37	rs149611468	T	C	T	C	0.078	0.0979	0.989	0.986	FALSE	FALSE	FALSE	ieu-b-7	3	8817423	0.11	468692	0.3737	Parkinson's disease || id:ieu-b-7	Parkinson's disease	Parkinson's disease || ||	TRUE	igd	0.013	Chronotype	TRUE	1.97318e-09	inferred	s6K7cB	textfile	2	1	TRUE	NA	NA	NA	NA	NA	NA	NA
Chronotype	38	rs1599374	A	G	A	G	0.015	0.0078	0.516	0.5175	FALSE	FALSE	FALSE	ieu-b-7	3	160891727	0.0177	482730	0.660601	Parkinson's disease || id:ieu-b-7	Parkinson's disease	Parkinson's disease || ||	TRUE	igd	0.003	Chronotype	TRUE	5.73303e-07	inferred	s6K7cB	textfile	2	1	TRUE	NA	NA	NA	NA	NA	NA	NA
Chronotype	39	rs16939162	A	G	A	G	0.025	-0.018	0.83	0.8264	FALSE	FALSE	FALSE	ieu-b-7	8	76653156	0.027	481408	0.5041	Parkinson's disease || id:ieu-b-7	Parkinson's disease	Parkinson's disease || ||	TRUE	igd	0.004	Chronotype	TRUE	4.10453e-10	inferred	s6K7cB	textfile	2	1	TRUE	NA	NA	NA	NA	NA	NA	NA
Chronotype	40	rs17302081	T	C	T	C	0.016	-0.0049	0.441	0.4316	FALSE	FALSE	FALSE	ieu-b-7	7	115673079	0.0197	482730	0.8031	Parkinson's disease || id:ieu-b-7	Parkinson's disease	Parkinson's disease || ||	TRUE	igd	0.003	Chronotype	TRUE	9.64261e-08	inferred	s6K7cB	textfile	2	1	TRUE	NA	NA	NA	NA	NA	NA	NA
Chronotype	41	rs17448682	T	C	T	C	0.022	0.0191	0.234	0.2301	FALSE	FALSE	FALSE	ieu-b-7	1	15966713	0.0218	482730	0.3812	Parkinson's disease || id:ieu-b-7	Parkinson's disease	Parkinson's disease || ||	TRUE	igd	0.003	Chronotype	TRUE	2.24498e-13	inferred	s6K7cB	textfile	2	1	TRUE	NA	NA	NA	NA	NA	NA	NA
Chronotype	42	rs17575798	A	G	A	G	-0.023	-0.0377	0.192	0.1882	FALSE	FALSE	FALSE	ieu-b-7	1	110086451	0.0221	482730	0.0879893	Parkinson's disease || id:ieu-b-7	Parkinson's disease	Parkinson's disease || ||	TRUE	igd	0.003	Chronotype	TRUE	1.76524e-14	inferred	s6K7cB	textfile	2	1	TRUE	NA	NA	NA	NA	NA	NA	NA
Chronotype	43	rs17604349	A	G	A	G	-0.026	-0.0002	0.185	0.187	FALSE	FALSE	FALSE	ieu-b-7	16	72210865	0.0219	482730	0.9909	Parkinson's disease || id:ieu-b-7	Parkinson's disease	Parkinson's disease || ||	TRUE	igd	0.004	Chronotype	TRUE	8.032e-11	inferred	s6K7cB	textfile	2	1	TRUE	NA	NA	NA	NA	NA	NA	NA
Chronotype	44	rs1800828	C	G	C	G	0.018	0.0013	0.751	0.7572	FALSE	TRUE	FALSE	ieu-b-7	3	113891549	0.0201	482730	0.9493	Parkinson's disease || id:ieu-b-7	Parkinson's disease	Parkinson's disease || ||	TRUE	igd	0.003	Chronotype	TRUE	1.97318e-09	inferred	s6K7cB	textfile	2	1	TRUE	NA	NA	NA	NA	NA	NA	NA
Chronotype	45	rs184033703	A	G	A	G	0.038	0.0326	0.059	0.0598	FALSE	FALSE	FALSE	ieu-b-7	2	206956138	0.0403	482730	0.4182	Parkinson's disease || id:ieu-b-7	Parkinson's disease	Parkinson's disease || ||	TRUE	igd	0.006	Chronotype	TRUE	2.3992e-10	inferred	s6K7cB	textfile	2	1	TRUE	NA	NA	NA	NA	NA	NA	NA
Chronotype	46	rs184033703	A	G	A	G	0.038	0.0326	0.059	0.0598	FALSE	FALSE	FALSE	ieu-b-7	2	206956138	0.0403	482730	0.4182	Parkinson's disease || id:ieu-b-7	Parkinson's disease	Parkinson's disease || ||	TRUE	igd	0.006	Chronotype	TRUE	2.3992e-10	inferred	s6K7cB	textfile	2	2	TRUE	NA	NA	NA	NA	NA	NA	NA
Chronotype	47	rs1886205	A	C	A	C	0.019	0.0142	0.76	0.7588	FALSE	FALSE	FALSE	ieu-b-7	13	94062095	0.0249	471013	0.5693	Parkinson's disease || id:ieu-b-7	Parkinson's disease	Parkinson's disease || ||	TRUE	igd	0.003	Chronotype	TRUE	2.3992e-10	inferred	s6K7cB	textfile	2	1	TRUE	NA	NA	NA	NA	NA	NA	NA
Chronotype	48	rs2011528	T	C	T	C	-0.021	0.0287	0.825	0.8169	FALSE	FALSE	FALSE	ieu-b-7	17	33980566	0.0228	482730	0.2073	Parkinson's disease || id:ieu-b-7	Parkinson's disease	Parkinson's disease || ||	TRUE	igd	0.004	Chronotype	TRUE	1.52099e-07	inferred	s6K7cB	textfile	2	1	TRUE	NA	NA	NA	NA	NA	NA	NA
Chronotype	49	rs2166559	T	C	T	C	-0.022	-0.0036	0.861	0.8561	FALSE	FALSE	FALSE	ieu-b-7	2	149551658	0.0283	482730	0.8981	Parkinson's disease || id:ieu-b-7	Parkinson's disease	Parkinson's disease || ||	TRUE	igd	0.004	Chronotype	TRUE	3.79791e-08	inferred	s6K7cB	textfile	2	1	TRUE	NA	NA	NA	NA	NA	NA	NA
Chronotype	50	rs2362775	T	C	T	C	-0.018	0.0237	0.534	0.5501	FALSE	FALSE	FALSE	ieu-b-7	3	24924421	0.0224	468692	0.2894	Parkinson's disease || id:ieu-b-7	Parkinson's disease	Parkinson's disease || ||	TRUE	igd	0.003	Chronotype	TRUE	1.97318e-09	inferred	s6K7cB	textfile	2	1	TRUE	NA	NA	NA	NA	NA	NA	NA
Chronotype	51	rs2653349	A	G	A	G	0.039	-0.003	0.207	0.1966	FALSE	FALSE	FALSE	ieu-b-7	6	55142337	0.0211	482730	0.8868	Parkinson's disease || id:ieu-b-7	Parkinson's disease	Parkinson's disease || ||	TRUE	igd	0.003	Chronotype	TRUE	1.22343e-38	inferred	s6K7cB	textfile	2	1	TRUE	NA	NA	NA	NA	NA	NA	NA
Chronotype	52	rs2737245	T	G	T	G	0.022	0.0034	0.275	0.2527	FALSE	FALSE	FALSE	ieu-b-7	8	116658583	0.021	482730	0.8718	Parkinson's disease || id:ieu-b-7	Parkinson's disease	Parkinson's disease || ||	TRUE	igd	0.003	Chronotype	TRUE	2.24498e-13	inferred	s6K7cB	textfile	2	1	TRUE	NA	NA	NA	NA	NA	NA	NA
Chronotype	53	rs28380327	A	T	A	T	0.021	-0.0072	0.632	0.6244	FALSE	TRUE	FALSE	ieu-b-7	2	144232491	0.0229	468692	0.753701	Parkinson's disease || id:ieu-b-7	Parkinson's disease	Parkinson's disease || ||	TRUE	igd	0.003	Chronotype	TRUE	2.55963e-12	inferred	s6K7cB	textfile	2	1	TRUE	NA	NA	NA	NA	NA	NA	NA
Chronotype	54	rs28458909	T	C	T	C	-0.043	0.0229	0.123	0.1199	FALSE	FALSE	FALSE	ieu-b-7	9	140257189	0.0283	482730	0.4188	Parkinson's disease || id:ieu-b-7	Parkinson's disease	Parkinson's disease || ||	TRUE	igd	0.004	Chronotype	TRUE	5.92616e-27	inferred	s6K7cB	textfile	2	1	TRUE	NA	NA	NA	NA	NA	NA	NA
Chronotype	55	rs2881955	T	C	T	C	0.016	0.0796	0.279	0.2828	FALSE	FALSE	FALSE	ieu-b-7	6	72479263	0.0187	482730	2.069e-05	Parkinson's disease || id:ieu-b-7	Parkinson's disease	Parkinson's disease || ||	TRUE	igd	0.003	Chronotype	TRUE	9.64261e-08	inferred	s6K7cB	textfile	2	1	TRUE	NA	NA	NA	NA	NA	NA	NA
Chronotype	56	rs2916148	A	G	A	G	0.016	0.0392	0.452	0.4487	FALSE	FALSE	FALSE	ieu-b-7	17	65482109	0.0226	468692	0.0823095	Parkinson's disease || id:ieu-b-7	Parkinson's disease	Parkinson's disease || ||	TRUE	igd	0.003	Chronotype	TRUE	9.64261e-08	inferred	s6K7cB	textfile	2	1	TRUE	NA	NA	NA	NA	NA	NA	NA
Chronotype	57	rs2944831	A	G	A	G	0.017	-0.0072	0.295	0.2874	FALSE	FALSE	FALSE	ieu-b-7	7	71779635	0.0218	482730	0.7411	Parkinson's disease || id:ieu-b-7	Parkinson's disease	Parkinson's disease || ||	TRUE	igd	0.003	Chronotype	TRUE	1.45602e-08	inferred	s6K7cB	textfile	2	1	TRUE	NA	NA	NA	NA	NA	NA	NA
Chronotype	58	rs2979139	A	G	A	G	-0.017	0.0275	0.505	0.5025	FALSE	FALSE	FALSE	ieu-b-7	8	8268313	0.0219	482730	0.2103	Parkinson's disease || id:ieu-b-7	Parkinson's disease	Parkinson's disease || ||	TRUE	igd	0.003	Chronotype	TRUE	1.45602e-08	inferred	s6K7cB	textfile	2	1	TRUE	NA	NA	NA	NA	NA	NA	NA
Chronotype	59	rs308521	T	C	T	C	0.02	-0.0295	0.604	0.6068	FALSE	FALSE	FALSE	ieu-b-7	9	37367094	0.022	471013	0.1798	Parkinson's disease || id:ieu-b-7	Parkinson's disease	Parkinson's disease || ||	TRUE	igd	0.003	Chronotype	TRUE	2.61678e-11	inferred	s6K7cB	textfile	2	1	TRUE	NA	NA	NA	NA	NA	NA	NA
Chronotype	60	rs3100052	A	G	A	G	0.017	0.0113	0.389	0.3946	FALSE	FALSE	FALSE	ieu-b-7	8	101967139	0.0228	468692	0.621199	Parkinson's disease || id:ieu-b-7	Parkinson's disease	Parkinson's disease || ||	TRUE	igd	0.003	Chronotype	TRUE	1.45602e-08	inferred	s6K7cB	textfile	2	1	TRUE	NA	NA	NA	NA	NA	NA	NA
Chronotype	61	rs3808964	T	G	T	G	0.016	-0.0126	0.633	0.6294	FALSE	FALSE	FALSE	ieu-b-7	10	125426627	0.0232	468692	0.5876	Parkinson's disease || id:ieu-b-7	Parkinson's disease	Parkinson's disease || ||	TRUE	igd	0.003	Chronotype	TRUE	9.64261e-08	inferred	s6K7cB	textfile	2	1	TRUE	NA	NA	NA	NA	NA	NA	NA
Chronotype	62	rs3850174	A	T	A	T	-0.019	-0.0304	0.258	0.2632	FALSE	TRUE	FALSE	ieu-b-7	3	172364093	0.028	466555	0.2778	Parkinson's disease || id:ieu-b-7	Parkinson's disease	Parkinson's disease || ||	TRUE	igd	0.003	Chronotype	TRUE	2.3992e-10	inferred	s6K7cB	textfile	2	1	TRUE	NA	NA	NA	NA	NA	NA	NA
Chronotype	63	rs4241964	T	G	T	G	-0.021	-0.0183	0.522	0.5244	FALSE	FALSE	FALSE	ieu-b-7	4	137053959	0.0225	468692	0.4154	Parkinson's disease || id:ieu-b-7	Parkinson's disease	Parkinson's disease || ||	TRUE	igd	0.003	Chronotype	TRUE	2.55963e-12	inferred	s6K7cB	textfile	2	1	TRUE	NA	NA	NA	NA	NA	NA	NA
Chronotype	64	rs4269995	T	C	T	C	-0.021	0.0249	0.251	0.255	FALSE	FALSE	FALSE	ieu-b-7	5	87701223	0.0211	482730	0.2388	Parkinson's disease || id:ieu-b-7	Parkinson's disease	Parkinson's disease || ||	TRUE	igd	0.003	Chronotype	TRUE	2.55963e-12	inferred	s6K7cB	textfile	2	1	TRUE	NA	NA	NA	NA	NA	NA	NA
Chronotype	65	rs4419127	A	G	A	G	0.022	-0.0418	0.662	0.6619	FALSE	FALSE	FALSE	ieu-b-7	18	31663654	0.0212	482730	0.0483003	Parkinson's disease || id:ieu-b-7	Parkinson's disease	Parkinson's disease || ||	TRUE	igd	0.003	Chronotype	TRUE	2.24498e-13	inferred	s6K7cB	textfile	2	1	TRUE	NA	NA	NA	NA	NA	NA	NA
Chronotype	66	rs4690085	A	G	A	G	-0.015	0.0318	0.535	0.542	FALSE	FALSE	FALSE	ieu-b-7	4	2697300	0.0198	482730	0.108	Parkinson's disease || id:ieu-b-7	Parkinson's disease	Parkinson's disease || ||	TRUE	igd	0.003	Chronotype	TRUE	5.73303e-07	inferred	s6K7cB	textfile	2	1	TRUE	NA	NA	NA	NA	NA	NA	NA
Chronotype	67	rs486416	A	G	A	G	-0.015	-0.0295	0.653	0.6636	FALSE	FALSE	FALSE	ieu-b-7	6	31856070	0.021	480593	0.1603	Parkinson's disease || id:ieu-b-7	Parkinson's disease	Parkinson's disease || ||	TRUE	igd	0.003	Chronotype	TRUE	5.73303e-07	inferred	s6K7cB	textfile	2	1	TRUE	NA	NA	NA	NA	NA	NA	NA
Chronotype	68	rs4936290	A	C	A	C	-0.018	-0.0183	0.658	0.6562	FALSE	FALSE	FALSE	ieu-b-7	11	114009255	0.0234	468692	0.4351	Parkinson's disease || id:ieu-b-7	Parkinson's disease	Parkinson's disease || ||	TRUE	igd	0.003	Chronotype	TRUE	1.97318e-09	inferred	s6K7cB	textfile	2	1	TRUE	NA	NA	NA	NA	NA	NA	NA
Chronotype	69	rs55846845	A	G	A	G	-0.016	-0.0442	0.518	0.5182	FALSE	FALSE	FALSE	ieu-b-7	17	50092201	0.0224	468692	0.0480496	Parkinson's disease || id:ieu-b-7	Parkinson's disease	Parkinson's disease || ||	TRUE	igd	0.003	Chronotype	TRUE	9.64261e-08	inferred	s6K7cB	textfile	2	1	TRUE	NA	NA	NA	NA	NA	NA	NA
Chronotype	70	rs59986227	C	G	C	G	-0.018	0.0045	0.749	0.7439	FALSE	TRUE	FALSE	ieu-b-7	15	48009263	0.0258	468692	0.8602	Parkinson's disease || id:ieu-b-7	Parkinson's disease	Parkinson's disease || ||	TRUE	igd	0.003	Chronotype	TRUE	1.97318e-09	inferred	s6K7cB	textfile	2	1	TRUE	NA	NA	NA	NA	NA	NA	NA
Chronotype	71	rs60616179	A	G	A	G	0.038	0.0452	0.944	0.9439	FALSE	FALSE	FALSE	ieu-b-7	6	110244765	0.049	471013	0.3559	Parkinson's disease || id:ieu-b-7	Parkinson's disease	Parkinson's disease || ||	TRUE	igd	0.006	Chronotype	TRUE	2.3992e-10	inferred	s6K7cB	textfile	2	1	TRUE	NA	NA	NA	NA	NA	NA	NA
Chronotype	72	rs6131805	T	G	T	G	0.016	0.0053	0.402	0.4125	FALSE	FALSE	FALSE	ieu-b-7	20	16222093	0.0266	13655	0.8427	Parkinson's disease || id:ieu-b-7	Parkinson's disease	Parkinson's disease || ||	TRUE	igd	0.003	Chronotype	TRUE	9.64261e-08	inferred	s6K7cB	textfile	2	1	TRUE	NA	NA	NA	NA	NA	NA	NA
Chronotype	73	rs6131942	A	G	A	G	-0.018	-0.0022	0.418	0.4168	FALSE	FALSE	FALSE	ieu-b-7	20	17348608	0.0196	482730	0.911	Parkinson's disease || id:ieu-b-7	Parkinson's disease	Parkinson's disease || ||	TRUE	igd	0.003	Chronotype	TRUE	1.97318e-09	inferred	s6K7cB	textfile	2	1	TRUE	NA	NA	NA	NA	NA	NA	NA
Chronotype	74	rs61773390	T	G	T	G	0.034	-0.0122	0.193	0.1865	FALSE	FALSE	FALSE	ieu-b-7	1	7884525	0.0218	482730	0.578	Parkinson's disease || id:ieu-b-7	Parkinson's disease	Parkinson's disease || ||	TRUE	igd	0.003	Chronotype	TRUE	8.97239e-30	inferred	s6K7cB	textfile	2	1	TRUE	NA	NA	NA	NA	NA	NA	NA
Chronotype	75	rs62082402	T	G	T	G	0.026	-0.0036	0.194	0.2032	FALSE	FALSE	FALSE	ieu-b-7	18	5186566	0.0276	468692	0.8947	Parkinson's disease || id:ieu-b-7	Parkinson's disease	Parkinson's disease || ||	TRUE	igd	0.003	Chronotype	TRUE	4.44955e-18	inferred	s6K7cB	textfile	2	1	TRUE	NA	NA	NA	NA	NA	NA	NA
Chronotype	76	rs62182135	A	C	A	C	-0.018	0.0398	0.329	0.3397	FALSE	FALSE	FALSE	ieu-b-7	2	240292802	0.0237	468692	0.0929994	Parkinson's disease || id:ieu-b-7	Parkinson's disease	Parkinson's disease || ||	TRUE	igd	0.003	Chronotype	TRUE	1.97318e-09	inferred	s6K7cB	textfile	2	1	TRUE	TRUE	rs62182135	rs62182155	A	C	C	T
Chronotype	77	rs62553781	T	C	T	C	-0.05	-0.0412	0.033	0.0339	FALSE	FALSE	FALSE	ieu-b-7	9	76679777	0.0638	468692	0.5184	Parkinson's disease || id:ieu-b-7	Parkinson's disease	Parkinson's disease || ||	TRUE	igd	0.007	Chronotype	TRUE	9.14106e-13	inferred	s6K7cB	textfile	2	1	TRUE	NA	NA	NA	NA	NA	NA	NA
Chronotype	78	rs6477309	T	C	T	C	0.017	-0.0079	0.666	0.6639	FALSE	FALSE	FALSE	ieu-b-7	9	8450638	0.0237	468692	0.7402	Parkinson's disease || id:ieu-b-7	Parkinson's disease	Parkinson's disease || ||	TRUE	igd	0.003	Chronotype	TRUE	1.45602e-08	inferred	s6K7cB	textfile	2	1	TRUE	NA	NA	NA	NA	NA	NA	NA
Chronotype	79	rs6727752	A	G	A	G	0.016	-0.0523	0.357	0.3612	FALSE	FALSE	FALSE	ieu-b-7	2	76362761	0.0207	482730	0.0114301	Parkinson's disease || id:ieu-b-7	Parkinson's disease	Parkinson's disease || ||	TRUE	igd	0.003	Chronotype	TRUE	9.64261e-08	inferred	s6K7cB	textfile	2	1	TRUE	TRUE	rs6727752	rs150472435	A	G	G	A
Chronotype	80	rs6794796	A	G	A	G	0.017	-0.0043	0.29	0.2967	FALSE	FALSE	FALSE	ieu-b-7	3	14383632	0.0243	468692	0.8591	Parkinson's disease || id:ieu-b-7	Parkinson's disease	Parkinson's disease || ||	TRUE	igd	0.003	Chronotype	TRUE	1.45602e-08	inferred	s6K7cB	textfile	2	1	TRUE	NA	NA	NA	NA	NA	NA	NA
Chronotype	81	rs67988891	C	G	C	G	-0.023	0.0107	0.682	0.6851	FALSE	TRUE	FALSE	ieu-b-7	5	152204741	0.0204	480593	0.6019	Parkinson's disease || id:ieu-b-7	Parkinson's disease	Parkinson's disease || ||	TRUE	igd	0.003	Chronotype	TRUE	1.76524e-14	inferred	s6K7cB	textfile	2	1	TRUE	NA	NA	NA	NA	NA	NA	NA
Chronotype	82	rs6846730	T	C	T	C	-0.022	0.0145	0.235	0.2329	FALSE	FALSE	FALSE	ieu-b-7	4	83279041	0.0265	468692	0.5841	Parkinson's disease || id:ieu-b-7	Parkinson's disease	Parkinson's disease || ||	TRUE	igd	0.003	Chronotype	TRUE	2.24498e-13	inferred	s6K7cB	textfile	2	1	TRUE	NA	NA	NA	NA	NA	NA	NA
Chronotype	83	rs6967481	T	C	T	C	0.021	-0.006	0.501	0.5053	FALSE	FALSE	FALSE	ieu-b-7	7	50642701	0.0174	482730	0.730299	Parkinson's disease || id:ieu-b-7	Parkinson's disease	Parkinson's disease || ||	TRUE	igd	0.003	Chronotype	TRUE	2.55963e-12	inferred	s6K7cB	textfile	2	1	TRUE	NA	NA	NA	NA	NA	NA	NA
Chronotype	84	rs6993892	T	C	T	C	-0.021	0.0173	0.616	0.6222	FALSE	FALSE	FALSE	ieu-b-7	8	33729200	0.023	468692	0.4498	Parkinson's disease || id:ieu-b-7	Parkinson's disease	Parkinson's disease || ||	TRUE	igd	0.003	Chronotype	TRUE	2.55963e-12	inferred	s6K7cB	textfile	2	1	TRUE	NA	NA	NA	NA	NA	NA	NA
Chronotype	85	rs7111582	A	G	A	G	-0.028	0.0021	0.896	0.8907	FALSE	FALSE	FALSE	ieu-b-7	11	43893222	0.0364	468692	0.954	Parkinson's disease || id:ieu-b-7	Parkinson's disease	Parkinson's disease || ||	TRUE	igd	0.004	Chronotype	TRUE	2.55963e-12	inferred	s6K7cB	textfile	2	1	TRUE	NA	NA	NA	NA	NA	NA	NA
Chronotype	86	rs72720396	A	G	A	G	-0.027	-0.0308	0.774	0.7774	FALSE	FALSE	FALSE	ieu-b-7	1	91191582	0.0265	469486	0.2448	Parkinson's disease || id:ieu-b-7	Parkinson's disease	Parkinson's disease || ||	TRUE	igd	0.003	Chronotype	TRUE	2.25718e-19	inferred	s6K7cB	textfile	2	1	TRUE	NA	NA	NA	NA	NA	NA	NA
Chronotype	87	rs72796401	A	T	A	T	0.022	-0.0641	0.19	0.1905	FALSE	TRUE	FALSE	ieu-b-7	2	24180078	0.0238	482730	0.00716605	Parkinson's disease || id:ieu-b-7	Parkinson's disease	Parkinson's disease || ||	TRUE	igd	0.003	Chronotype	TRUE	2.24498e-13	inferred	s6K7cB	textfile	2	1	TRUE	NA	NA	NA	NA	NA	NA	NA
Chronotype	88	rs72829706	A	G	A	G	0.041	-0.0023	0.96	0.9588	FALSE	FALSE	FALSE	ieu-b-7	17	54173733	0.0554	471013	0.967	Parkinson's disease || id:ieu-b-7	Parkinson's disease	Parkinson's disease || ||	TRUE	igd	0.007	Chronotype	TRUE	4.70898e-09	inferred	s6K7cB	textfile	2	1	TRUE	NA	NA	NA	NA	NA	NA	NA
Chronotype	89	rs72841368	A	T	A	T	-0.02	0.0358	0.81	0.806	FALSE	TRUE	FALSE	ieu-b-7	17	61391114	0.0281	468692	0.2025	Parkinson's disease || id:ieu-b-7	Parkinson's disease	Parkinson's disease || ||	TRUE	igd	0.003	Chronotype	TRUE	2.61678e-11	inferred	s6K7cB	textfile	2	1	TRUE	NA	NA	NA	NA	NA	NA	NA
Chronotype	90	rs7304278	A	G	A	G	-0.02	0.035	0.283	0.2735	FALSE	FALSE	FALSE	ieu-b-7	12	106989915	0.0251	468692	0.1622	Parkinson's disease || id:ieu-b-7	Parkinson's disease	Parkinson's disease || ||	TRUE	igd	0.003	Chronotype	TRUE	2.61678e-11	inferred	s6K7cB	textfile	2	1	TRUE	NA	NA	NA	NA	NA	NA	NA
Chronotype	91	rs73050286	T	C	T	C	0.018	0.0382	0.782	0.791	FALSE	FALSE	FALSE	ieu-b-7	3	23224684	0.0274	468692	0.1638	Parkinson's disease || id:ieu-b-7	Parkinson's disease	Parkinson's disease || ||	TRUE	igd	0.003	Chronotype	TRUE	1.97318e-09	inferred	s6K7cB	textfile	2	1	TRUE	NA	NA	NA	NA	NA	NA	NA
Chronotype	92	rs7429614	T	G	T	G	0.016	0.0188	0.416	0.418	FALSE	FALSE	FALSE	ieu-b-7	3	77205438	0.0225	468692	0.4035	Parkinson's disease || id:ieu-b-7	Parkinson's disease	Parkinson's disease || ||	TRUE	igd	0.003	Chronotype	TRUE	9.64261e-08	inferred	s6K7cB	textfile	2	1	TRUE	NA	NA	NA	NA	NA	NA	NA
Chronotype	93	rs74357745	A	G	A	G	0.027	0.0118	0.88	0.8847	FALSE	FALSE	FALSE	ieu-b-7	11	122811822	0.0352	470219	0.737801	Parkinson's disease || id:ieu-b-7	Parkinson's disease	Parkinson's disease || ||	TRUE	igd	0.004	Chronotype	TRUE	1.47845e-11	inferred	s6K7cB	textfile	2	1	TRUE	NA	NA	NA	NA	NA	NA	NA
Chronotype	94	rs75120545	T	C	T	C	0.061	0.1569	0.032	0.0277	FALSE	FALSE	FALSE	ieu-b-7	2	44271496	0.0717	469486	0.0285397	Parkinson's disease || id:ieu-b-7	Parkinson's disease	Parkinson's disease || ||	TRUE	igd	0.008	Chronotype	TRUE	2.44034e-14	inferred	s6K7cB	textfile	2	1	TRUE	NA	NA	NA	NA	NA	NA	NA
Chronotype	95	rs7701529	A	T	A	T	-0.019	-0.0523	0.239	0.2479	FALSE	TRUE	FALSE	ieu-b-7	5	63861475	0.026	468692	0.0440697	Parkinson's disease || id:ieu-b-7	Parkinson's disease	Parkinson's disease || ||	TRUE	igd	0.003	Chronotype	TRUE	2.3992e-10	inferred	s6K7cB	textfile	2	1	TRUE	NA	NA	NA	NA	NA	NA	NA
Chronotype	96	rs7735794	A	G	A	G	0.02	0.029	0.224	0.2252	FALSE	FALSE	FALSE	ieu-b-7	5	175339984	0.0338	13655	0.3917	Parkinson's disease || id:ieu-b-7	Parkinson's disease	Parkinson's disease || ||	TRUE	igd	0.003	Chronotype	TRUE	2.61678e-11	inferred	s6K7cB	textfile	2	1	TRUE	NA	NA	NA	NA	NA	NA	NA
Chronotype	97	rs77960	A	G	A	G	0.019	-0.0205	0.33	0.3223	FALSE	FALSE	FALSE	ieu-b-7	5	104069917	0.0238	468692	0.3882	Parkinson's disease || id:ieu-b-7	Parkinson's disease	Parkinson's disease || ||	TRUE	igd	0.003	Chronotype	TRUE	2.3992e-10	inferred	s6K7cB	textfile	2	1	TRUE	TRUE	rs77960	rs161645	A	G	A	G
Chronotype	98	rs7845620	A	C	A	C	-0.022	-0.0045	0.834	0.8255	FALSE	FALSE	FALSE	ieu-b-7	8	53129069	0.0295	468692	0.8777	Parkinson's disease || id:ieu-b-7	Parkinson's disease	Parkinson's disease || ||	TRUE	igd	0.004	Chronotype	TRUE	3.79791e-08	inferred	s6K7cB	textfile	2	1	TRUE	NA	NA	NA	NA	NA	NA	NA
Chronotype	99	rs7959983	T	C	T	C	-0.02	-0.0465	0.596	0.5865	FALSE	FALSE	FALSE	ieu-b-7	12	90452978	0.0191	27693	0.0151199	Parkinson's disease || id:ieu-b-7	Parkinson's disease	Parkinson's disease || ||	TRUE	igd	0.003	Chronotype	TRUE	2.61678e-11	inferred	s6K7cB	textfile	2	1	TRUE	NA	NA	NA	NA	NA	NA	NA
Chronotype	100	rs80271258	T	C	T	C	-0.055	0.0451	0.084	0.0841	FALSE	FALSE	FALSE	ieu-b-7	2	239311505	0.0335	482730	0.178	Parkinson's disease || id:ieu-b-7	Parkinson's disease	Parkinson's disease || ||	TRUE	igd	0.005	Chronotype	TRUE	3.82132e-28	inferred	s6K7cB	textfile	2	1	TRUE	NA	NA	NA	NA	NA	NA	NA
Chronotype	101	rs812925	C	G	C	G	-0.021	0.0176	0.646	0.6382	FALSE	TRUE	FALSE	ieu-b-7	2	61680993	0.0195	482730	0.3659	Parkinson's disease || id:ieu-b-7	Parkinson's disease	Parkinson's disease || ||	TRUE	igd	0.003	Chronotype	TRUE	2.55963e-12	inferred	s6K7cB	textfile	2	1	TRUE	NA	NA	NA	NA	NA	NA	NA
Chronotype	102	rs9348050	T	C	T	C	0.017	-0.0022	0.486	0.4776	FALSE	FALSE	FALSE	ieu-b-7	6	166263488	0.0224	468692	0.9219	Parkinson's disease || id:ieu-b-7	Parkinson's disease	Parkinson's disease || ||	TRUE	igd	0.003	Chronotype	TRUE	1.45602e-08	inferred	s6K7cB	textfile	2	1	TRUE	NA	NA	NA	NA	NA	NA	NA
Chronotype	103	rs9381812	A	G	A	G	-0.023	0.0303	0.705	0.7098	FALSE	FALSE	FALSE	ieu-b-7	6	13192190	0.0187	482730	0.1055	Parkinson's disease || id:ieu-b-7	Parkinson's disease	Parkinson's disease || ||	TRUE	igd	0.003	Chronotype	TRUE	1.76524e-14	inferred	s6K7cB	textfile	2	1	TRUE	TRUE	rs9381812	rs9357634	G	A	C	T
Chronotype	104	rs9416744	A	C	A	C	0.019	-0.0105	0.26	0.2681	FALSE	FALSE	FALSE	ieu-b-7	10	60567937	0.0196	482730	0.5925	Parkinson's disease || id:ieu-b-7	Parkinson's disease	Parkinson's disease || ||	TRUE	igd	0.003	Chronotype	TRUE	2.3992e-10	inferred	s6K7cB	textfile	2	1	TRUE	NA	NA	NA	NA	NA	NA	NA
Chronotype	105	rs9436119	A	G	A	G	0.023	-0.0029	0.384	0.4055	FALSE	FALSE	FALSE	ieu-b-7	1	150467753	0.0172	482730	0.8668	Parkinson's disease || id:ieu-b-7	Parkinson's disease	Parkinson's disease || ||	TRUE	igd	0.003	Chronotype	TRUE	1.76524e-14	inferred	s6K7cB	textfile	2	1	TRUE	NA	NA	NA	NA	NA	NA	NA
Chronotype	106	rs9479402	T	C	T	C	-0.107	0.0129	0.988	0.9865	FALSE	FALSE	FALSE	ieu-b-7	6	153135339	0.101	468692	0.8987	Parkinson's disease || id:ieu-b-7	Parkinson's disease	Parkinson's disease || ||	TRUE	igd	0.013	Chronotype	TRUE	1.86015e-16	inferred	s6K7cB	textfile	2	1	TRUE	NA	NA	NA	NA	NA	NA	NA
Chronotype	107	rs9573980	A	G	A	G	0.073	-0.0766	0.966	0.9673	FALSE	FALSE	FALSE	ieu-b-7	13	77590741	0.0484	482730	0.1135	Parkinson's disease || id:ieu-b-7	Parkinson's disease	Parkinson's disease || ||	TRUE	igd	0.007	Chronotype	TRUE	1.83628e-25	inferred	s6K7cB	textfile	2	1	TRUE	NA	NA	NA	NA	NA	NA	NA
Chronotype	108	rs9597241	A	C	A	C	0.021	0.0205	0.811	0.8175	FALSE	FALSE	FALSE	ieu-b-7	13	56281271	0.0262	482730	0.4347	Parkinson's disease || id:ieu-b-7	Parkinson's disease	Parkinson's disease || ||	TRUE	igd	0.003	Chronotype	TRUE	2.55963e-12	inferred	s6K7cB	textfile	2	1	TRUE	NA	NA	NA	NA	NA	NA	NA
Chronotype	109	rs962961	T	C	T	C	-0.016	0.0219	0.331	0.3315	FALSE	FALSE	FALSE	ieu-b-7	14	57281154	0.0236	468692	0.3542	Parkinson's disease || id:ieu-b-7	Parkinson's disease	Parkinson's disease || ||	TRUE	igd	0.003	Chronotype	TRUE	9.64261e-08	inferred	s6K7cB	textfile	2	1	TRUE	NA	NA	NA	NA	NA	NA	NA
Chronotype	110	rs9636202	A	G	A	G	-0.018	-0.0201	0.266	0.2592	FALSE	FALSE	FALSE	ieu-b-7	19	18449238	0.0221	482730	0.3623	Parkinson's disease || id:ieu-b-7	Parkinson's disease	Parkinson's disease || ||	TRUE	igd	0.003	Chronotype	TRUE	1.97318e-09	inferred	s6K7cB	textfile	2	1	TRUE	NA	NA	NA	NA	NA	NA	NA
Chronotype	111	rs975025	T	C	T	C	-0.032	-0.0063	0.076	0.0724	FALSE	FALSE	FALSE	ieu-b-7	1	179338327	0.0331	482730	0.8493	Parkinson's disease || id:ieu-b-7	Parkinson's disease	Parkinson's disease || ||	TRUE	igd	0.005	Chronotype	TRUE	1.55377e-10	inferred	s6K7cB	textfile	2	1	TRUE	NA	NA	NA	NA	NA	NA	NA
Chronotype	112	rs9964420	A	C	A	C	-0.028	-0.0069	0.298	0.2889	FALSE	FALSE	FALSE	ieu-b-7	18	56824041	0.0247	468692	0.7812	Parkinson's disease || id:ieu-b-7	Parkinson's disease	Parkinson's disease || ||	TRUE	igd	0.003	Chronotype	TRUE	1.02593e-20	inferred	s6K7cB	textfile	2	1	TRUE	NA	NA	NA	NA	NA	NA	NA
Daytime_napping	1	rs1001817	C	T	C	T	0.008	-0.0328	0.507	0.4857	FALSE	FALSE	FALSE	ieu-b-7	3	183995341	0.0168	482730	0.0512602	Parkinson's disease || id:ieu-b-7	Parkinson's disease	Parkinson's disease || ||	TRUE	igd	0.001	Daytime_napping	TRUE	1.24419e-15	inferred	gyQlbY	textfile	2	1	TRUE	NA	NA	NA	NA	NA	NA	NA
Daytime_napping	2	rs10152428	C	G	C	G	0.008	0.0328	0.73	0.7366	FALSE	TRUE	FALSE	ieu-b-7	15	93510243	0.0254	468692	0.1961	Parkinson's disease || id:ieu-b-7	Parkinson's disease	Parkinson's disease || ||	TRUE	igd	0.001	Daytime_napping	TRUE	1.24419e-15	inferred	gyQlbY	textfile	2	1	TRUE	NA	NA	NA	NA	NA	NA	NA
Daytime_napping	3	rs10257273	A	T	A	T	0.011	-0.0156	0.851	0.8479	FALSE	TRUE	FALSE	ieu-b-7	7	99188589	0.0236	482730	0.5083	Parkinson's disease || id:ieu-b-7	Parkinson's disease	Parkinson's disease || ||	TRUE	igd	0.002	Daytime_napping	TRUE	3.79791e-08	inferred	gyQlbY	textfile	2	1	TRUE	NA	NA	NA	NA	NA	NA	NA
Daytime_napping	4	rs10811438	G	C	G	C	0.007	0.017	0.607	0.6152	FALSE	TRUE	FALSE	ieu-b-7	9	20962282	0.0173	482730	0.3254	Parkinson's disease || id:ieu-b-7	Parkinson's disease	Parkinson's disease || ||	TRUE	igd	0.001	Daytime_napping	TRUE	2.55963e-12	inferred	gyQlbY	textfile	2	1	TRUE	NA	NA	NA	NA	NA	NA	NA
Daytime_napping	5	rs10835420	T	A	T	A	0.009	-0.0198	0.751	0.7457	FALSE	TRUE	FALSE	ieu-b-7	11	28870464	0.0256	468692	0.4385	Parkinson's disease || id:ieu-b-7	Parkinson's disease	Parkinson's disease || ||	TRUE	igd	0.001	Daytime_napping	TRUE	2.25718e-19	inferred	gyQlbY	textfile	2	1	TRUE	TRUE	rs10835420	rs2945104	A	T	C	T
Daytime_napping	6	rs10875606	C	A	C	A	0.007	-0.0071	0.316	0.3254	FALSE	FALSE	FALSE	ieu-b-7	5	143769614	0.0237	468692	0.7634	Parkinson's disease || id:ieu-b-7	Parkinson's disease	Parkinson's disease || ||	TRUE	igd	0.001	Daytime_napping	TRUE	2.55963e-12	inferred	gyQlbY	textfile	2	1	TRUE	NA	NA	NA	NA	NA	NA	NA
Daytime_napping	7	rs10875622	A	G	A	G	0.01	0.0056	0.575	0.5855	FALSE	FALSE	FALSE	ieu-b-7	5	146693062	0.0226	468692	0.8039	Parkinson's disease || id:ieu-b-7	Parkinson's disease	Parkinson's disease || ||	TRUE	igd	0.001	Daytime_napping	TRUE	1.52397e-23	inferred	gyQlbY	textfile	2	1	TRUE	NA	NA	NA	NA	NA	NA	NA
Daytime_napping	8	rs11071755	G	A	G	A	0.007	-0.0542	0.575	0.5826	FALSE	FALSE	FALSE	ieu-b-7	15	63793936	0.0194	482730	0.00510199	Parkinson's disease || id:ieu-b-7	Parkinson's disease	Parkinson's disease || ||	TRUE	igd	0.001	Daytime_napping	TRUE	2.55963e-12	inferred	gyQlbY	textfile	2	1	TRUE	NA	NA	NA	NA	NA	NA	NA
Daytime_napping	9	rs11125776	T	G	T	G	0.012	-0.0203	0.854	0.867	FALSE	FALSE	FALSE	ieu-b-7	2	59478517	0.0272	482730	0.4539	Parkinson's disease || id:ieu-b-7	Parkinson's disease	Parkinson's disease || ||	TRUE	igd	0.002	Daytime_napping	TRUE	1.97318e-09	inferred	gyQlbY	textfile	2	1	TRUE	NA	NA	NA	NA	NA	NA	NA
Daytime_napping	10	rs11224896	T	C	T	C	0.011	0.003	0.89	0.8875	FALSE	FALSE	FALSE	ieu-b-7	11	101479583	0.0356	468692	0.9328	Parkinson's disease || id:ieu-b-7	Parkinson's disease	Parkinson's disease || ||	TRUE	igd	0.002	Daytime_napping	TRUE	3.79791e-08	inferred	gyQlbY	textfile	2	1	TRUE	NA	NA	NA	NA	NA	NA	NA
Daytime_napping	11	rs112520848	C	G	C	G	0.007	-0.001	0.386	0.4095	FALSE	TRUE	FALSE	ieu-b-7	17	64308310	0.0173	482730	0.9534	Parkinson's disease || id:ieu-b-7	Parkinson's disease	Parkinson's disease || ||	TRUE	igd	0.001	Daytime_napping	TRUE	2.55963e-12	inferred	gyQlbY	textfile	2	1	TRUE	NA	NA	NA	NA	NA	NA	NA
Daytime_napping	12	rs11258652	C	A	C	A	0.01	0.006	0.763	0.7667	FALSE	FALSE	FALSE	ieu-b-7	10	13868855	0.0263	468692	0.8191	Parkinson's disease || id:ieu-b-7	Parkinson's disease	Parkinson's disease || ||	TRUE	igd	0.001	Daytime_napping	TRUE	1.52397e-23	inferred	gyQlbY	textfile	2	1	TRUE	NA	NA	NA	NA	NA	NA	NA
Daytime_napping	13	rs11615756	T	C	T	C	0.018	0.0017	0.405	0.401	FALSE	FALSE	FALSE	ieu-b-7	12	117943058	0.0228	468692	0.9403	Parkinson's disease || id:ieu-b-7	Parkinson's disease	Parkinson's disease || ||	TRUE	igd	0.001	Daytime_napping	TRUE	1.94819e-72	inferred	gyQlbY	textfile	2	1	TRUE	TRUE	rs11615756	rs1983336	T	C	A	G
Daytime_napping	14	rs12140153	G	T	G	T	0.025	0.0395	0.9	0.9179	FALSE	FALSE	FALSE	ieu-b-7	1	62579891	0.0314	482730	0.2082	Parkinson's disease || id:ieu-b-7	Parkinson's disease	Parkinson's disease || ||	TRUE	igd	0.002	Daytime_napping	TRUE	7.46513e-36	inferred	gyQlbY	textfile	2	1	TRUE	NA	NA	NA	NA	NA	NA	NA
Daytime_napping	15	rs12346996	T	C	T	C	0.008	-0.0214	0.272	0.2641	FALSE	FALSE	FALSE	ieu-b-7	9	131840856	0.0202	482730	0.2896	Parkinson's disease || id:ieu-b-7	Parkinson's disease	Parkinson's disease || ||	TRUE	igd	0.001	Daytime_napping	TRUE	1.24419e-15	inferred	gyQlbY	textfile	2	1	TRUE	NA	NA	NA	NA	NA	NA	NA
Daytime_napping	16	rs12451365	C	T	C	T	0.011	-0.0283	0.205	0.1988	FALSE	FALSE	FALSE	ieu-b-7	17	35595368	0.0281	468692	0.3142	Parkinson's disease || id:ieu-b-7	Parkinson's disease	Parkinson's disease || ||	TRUE	igd	0.002	Daytime_napping	TRUE	3.79791e-08	inferred	gyQlbY	textfile	2	1	TRUE	NA	NA	NA	NA	NA	NA	NA
Daytime_napping	17	rs12614085	C	T	C	T	0.012	-0.0951	0.09	0.0861	FALSE	FALSE	FALSE	ieu-b-7	2	151501545	0.0404	468692	0.01854	Parkinson's disease || id:ieu-b-7	Parkinson's disease	Parkinson's disease || ||	TRUE	igd	0.002	Daytime_napping	TRUE	1.97318e-09	inferred	gyQlbY	textfile	2	1	TRUE	NA	NA	NA	NA	NA	NA	NA
Daytime_napping	18	rs12657723	T	C	T	C	0.008	-0.0119	0.322	0.3154	FALSE	FALSE	FALSE	ieu-b-7	5	62760828	0.0239	468692	0.6195	Parkinson's disease || id:ieu-b-7	Parkinson's disease	Parkinson's disease || ||	TRUE	igd	0.001	Daytime_napping	TRUE	1.24419e-15	inferred	gyQlbY	textfile	2	1	TRUE	NA	NA	NA	NA	NA	NA	NA
Daytime_napping	19	rs13033444	G	A	G	A	0.01	0.0246	0.283	0.2717	FALSE	FALSE	FALSE	ieu-b-7	2	23611438	0.0251	468692	0.3271	Parkinson's disease || id:ieu-b-7	Parkinson's disease	Parkinson's disease || ||	TRUE	igd	0.001	Daytime_napping	TRUE	1.52397e-23	inferred	gyQlbY	textfile	2	1	TRUE	NA	NA	NA	NA	NA	NA	NA
Daytime_napping	20	rs13263535	G	T	G	T	0.007	0.0093	0.531	0.519	FALSE	FALSE	FALSE	ieu-b-7	8	1175131	0.0224	468692	0.6787	Parkinson's disease || id:ieu-b-7	Parkinson's disease	Parkinson's disease || ||	TRUE	igd	0.001	Daytime_napping	TRUE	2.55963e-12	inferred	gyQlbY	textfile	2	1	TRUE	NA	NA	NA	NA	NA	NA	NA
Daytime_napping	21	rs13284688	C	T	C	T	0.015	-0.008	0.207	0.2035	FALSE	FALSE	FALSE	ieu-b-7	9	81727018	0.0281	468692	0.7755	Parkinson's disease || id:ieu-b-7	Parkinson's disease	Parkinson's disease || ||	TRUE	igd	0.001	Daytime_napping	TRUE	7.34193e-51	inferred	gyQlbY	textfile	2	1	TRUE	NA	NA	NA	NA	NA	NA	NA
Daytime_napping	22	rs140506252	A	T	A	T	0.023	0.0456	0.978	0.981	FALSE	TRUE	FALSE	ieu-b-7	6	155129280	0.0648	482730	0.481599	Parkinson's disease || id:ieu-b-7	Parkinson's disease	Parkinson's disease || ||	TRUE	igd	0.004	Daytime_napping	TRUE	8.92434e-09	inferred	gyQlbY	textfile	2	1	TRUE	NA	NA	NA	NA	NA	NA	NA
Daytime_napping	23	rs1592544	C	T	C	T	0.009	-0.0199	0.504	0.4953	FALSE	FALSE	FALSE	ieu-b-7	16	56129903	0.0239	466555	0.4054	Parkinson's disease || id:ieu-b-7	Parkinson's disease	Parkinson's disease || ||	TRUE	igd	0.001	Daytime_napping	TRUE	2.25718e-19	inferred	gyQlbY	textfile	2	1	TRUE	TRUE	rs1592544	rs12597179	T	C	T	C
Daytime_napping	24	rs1601440	C	T	C	T	0.009	-0.0339	0.279	0.2625	FALSE	FALSE	FALSE	ieu-b-7	3	84665570	0.0251	468692	0.1766	Parkinson's disease || id:ieu-b-7	Parkinson's disease	Parkinson's disease || ||	TRUE	igd	0.001	Daytime_napping	TRUE	2.25718e-19	inferred	gyQlbY	textfile	2	1	TRUE	TRUE	rs1601440	rs1485581	C	T	G	A
Daytime_napping	25	rs17049683	G	A	G	A	0.008	0.0102	0.333	0.3416	FALSE	FALSE	FALSE	ieu-b-7	2	58905715	0.0238	468692	0.667699	Parkinson's disease || id:ieu-b-7	Parkinson's disease	Parkinson's disease || ||	TRUE	igd	0.001	Daytime_napping	TRUE	1.24419e-15	inferred	gyQlbY	textfile	2	1	TRUE	NA	NA	NA	NA	NA	NA	NA
Daytime_napping	26	rs17158413	A	G	A	G	0.009	-0.0229	0.237	0.2302	FALSE	FALSE	FALSE	ieu-b-7	15	83236392	0.021	482730	0.2744	Parkinson's disease || id:ieu-b-7	Parkinson's disease	Parkinson's disease || ||	TRUE	igd	0.001	Daytime_napping	TRUE	2.25718e-19	inferred	gyQlbY	textfile	2	1	TRUE	TRUE	rs17158413	rs28648832	A	G	G	A
Daytime_napping	27	rs17265513	C	T	C	T	0.009	0.007	0.199	0.1969	FALSE	FALSE	FALSE	ieu-b-7	20	39832628	0.0211	482730	0.740901	Parkinson's disease || id:ieu-b-7	Parkinson's disease	Parkinson's disease || ||	TRUE	igd	0.002	Daytime_napping	TRUE	6.79535e-06	inferred	gyQlbY	textfile	2	1	TRUE	NA	NA	NA	NA	NA	NA	NA
Daytime_napping	28	rs174541	C	T	C	T	0.01	0.0054	0.36	0.3428	FALSE	FALSE	FALSE	ieu-b-7	11	61565908	0.0179	482730	0.764599	Parkinson's disease || id:ieu-b-7	Parkinson's disease	Parkinson's disease || ||	TRUE	igd	0.001	Daytime_napping	TRUE	1.52397e-23	inferred	gyQlbY	textfile	2	1	TRUE	NA	NA	NA	NA	NA	NA	NA
Daytime_napping	29	rs1883048	C	T	C	T	0.008	0.0014	0.524	0.5406	FALSE	FALSE	FALSE	ieu-b-7	21	47397586	0.0188	482730	0.9403	Parkinson's disease || id:ieu-b-7	Parkinson's disease	Parkinson's disease || ||	TRUE	igd	0.001	Daytime_napping	TRUE	1.24419e-15	inferred	gyQlbY	textfile	2	1	TRUE	NA	NA	NA	NA	NA	NA	NA
Daytime_napping	30	rs189489	C	G	C	G	0.008	-0.0001	0.788	0.7826	FALSE	TRUE	FALSE	ieu-b-7	5	100809375	0.0221	482730	0.9974	Parkinson's disease || id:ieu-b-7	Parkinson's disease	Parkinson's disease || ||	TRUE	igd	0.001	Daytime_napping	TRUE	1.24419e-15	inferred	gyQlbY	textfile	2	1	TRUE	NA	NA	NA	NA	NA	NA	NA
Daytime_napping	31	rs1931175	G	C	G	C	0.008	-0.0137	0.384	0.3741	FALSE	TRUE	FALSE	ieu-b-7	1	96928273	0.0181	482730	0.4517	Parkinson's disease || id:ieu-b-7	Parkinson's disease	Parkinson's disease || ||	TRUE	igd	0.001	Daytime_napping	TRUE	1.24419e-15	inferred	gyQlbY	textfile	2	1	TRUE	NA	NA	NA	NA	NA	NA	NA
Daytime_napping	32	rs2059639	C	T	C	T	0.007	-0.0214	0.479	0.4689	FALSE	FALSE	FALSE	ieu-b-7	8	67382165	0.0169	482730	0.2047	Parkinson's disease || id:ieu-b-7	Parkinson's disease	Parkinson's disease || ||	TRUE	igd	0.001	Daytime_napping	TRUE	2.55963e-12	inferred	gyQlbY	textfile	2	1	TRUE	TRUE	rs2059639	rs2719006	C	T	C	T
Daytime_napping	33	rs2099810	A	G	A	G	0.008	-0.0165	0.503	0.5045	FALSE	FALSE	FALSE	ieu-b-7	5	112030173	0.0219	471013	0.4493	Parkinson's disease || id:ieu-b-7	Parkinson's disease	Parkinson's disease || ||	TRUE	igd	0.001	Daytime_napping	TRUE	1.24419e-15	inferred	gyQlbY	textfile	2	1	TRUE	NA	NA	NA	NA	NA	NA	NA
Daytime_napping	34	rs2143792	G	A	G	A	0.007	-0.0093	0.568	0.5701	FALSE	FALSE	FALSE	ieu-b-7	6	62182204	0.0227	468692	0.681999	Parkinson's disease || id:ieu-b-7	Parkinson's disease	Parkinson's disease || ||	TRUE	igd	0.001	Daytime_napping	TRUE	2.55963e-12	inferred	gyQlbY	textfile	2	1	TRUE	NA	NA	NA	NA	NA	NA	NA
Daytime_napping	35	rs224111	G	A	G	A	0.008	0.0016	0.612	0.6001	FALSE	FALSE	FALSE	ieu-b-7	10	64552010	0.0177	482730	0.9262	Parkinson's disease || id:ieu-b-7	Parkinson's disease	Parkinson's disease || ||	TRUE	igd	0.001	Daytime_napping	TRUE	1.24419e-15	inferred	gyQlbY	textfile	2	1	TRUE	NA	NA	NA	NA	NA	NA	NA
Daytime_napping	36	rs2250377	A	G	A	G	0.013	-0.0243	0.339	0.3058	FALSE	FALSE	FALSE	ieu-b-7	1	201860626	0.0181	482730	0.181	Parkinson's disease || id:ieu-b-7	Parkinson's disease	Parkinson's disease || ||	TRUE	igd	0.001	Daytime_napping	TRUE	1.22343e-38	inferred	gyQlbY	textfile	2	1	TRUE	NA	NA	NA	NA	NA	NA	NA
Daytime_napping	37	rs2284015	G	C	G	C	0.008	-0.0329	0.259	0.2602	FALSE	TRUE	FALSE	ieu-b-7	22	37096573	0.0258	468692	0.203	Parkinson's disease || id:ieu-b-7	Parkinson's disease	Parkinson's disease || ||	TRUE	igd	0.001	Daytime_napping	TRUE	1.24419e-15	inferred	gyQlbY	textfile	2	1	TRUE	NA	NA	NA	NA	NA	NA	NA
Daytime_napping	38	rs2370926	T	C	T	C	0.008	0.0335	0.634	0.6423	FALSE	FALSE	FALSE	ieu-b-7	14	79602542	0.0236	468692	0.156	Parkinson's disease || id:ieu-b-7	Parkinson's disease	Parkinson's disease || ||	TRUE	igd	0.001	Daytime_napping	TRUE	1.24419e-15	inferred	gyQlbY	textfile	2	1	TRUE	NA	NA	NA	NA	NA	NA	NA
Daytime_napping	39	rs2431108	C	T	C	T	0.013	-0.0233	0.329	0.3281	FALSE	FALSE	FALSE	ieu-b-7	5	103947968	0.0233	471013	0.3186	Parkinson's disease || id:ieu-b-7	Parkinson's disease	Parkinson's disease || ||	TRUE	igd	0.001	Daytime_napping	TRUE	1.22343e-38	inferred	gyQlbY	textfile	2	1	TRUE	NA	NA	NA	NA	NA	NA	NA
Daytime_napping	40	rs253666	A	G	A	G	0.008	-0.0264	0.765	0.764	FALSE	FALSE	FALSE	ieu-b-7	3	138115770	0.0221	482730	0.2327	Parkinson's disease || id:ieu-b-7	Parkinson's disease	Parkinson's disease || ||	TRUE	igd	0.001	Daytime_napping	TRUE	1.24419e-15	inferred	gyQlbY	textfile	2	1	TRUE	NA	NA	NA	NA	NA	NA	NA
Daytime_napping	41	rs2653349	A	G	A	G	0.017	-0.003	0.215	0.1966	FALSE	FALSE	FALSE	ieu-b-7	6	55142337	0.0211	482730	0.8868	Parkinson's disease || id:ieu-b-7	Parkinson's disease	Parkinson's disease || ||	TRUE	igd	0.001	Daytime_napping	TRUE	8.21199e-65	inferred	gyQlbY	textfile	2	1	TRUE	NA	NA	NA	NA	NA	NA	NA
Daytime_napping	42	rs2699869	A	C	A	C	0.007	0.01	0.454	0.4508	FALSE	FALSE	FALSE	ieu-b-7	3	133032892	0.0218	471013	0.6483	Parkinson's disease || id:ieu-b-7	Parkinson's disease	Parkinson's disease || ||	TRUE	igd	0.001	Daytime_napping	TRUE	2.55963e-12	inferred	gyQlbY	textfile	2	1	TRUE	NA	NA	NA	NA	NA	NA	NA
Daytime_napping	43	rs271057	C	T	C	T	0.009	0.0009	0.248	0.2519	FALSE	FALSE	FALSE	ieu-b-7	11	92769748	0.0252	468692	0.9723	Parkinson's disease || id:ieu-b-7	Parkinson's disease	Parkinson's disease || ||	TRUE	igd	0.001	Daytime_napping	TRUE	2.25718e-19	inferred	gyQlbY	textfile	2	1	TRUE	NA	NA	NA	NA	NA	NA	NA
Daytime_napping	44	rs2769916	A	G	A	G	0.009	0.0415	0.689	0.6921	FALSE	FALSE	FALSE	ieu-b-7	13	107820389	0.0243	468692	0.0878598	Parkinson's disease || id:ieu-b-7	Parkinson's disease	Parkinson's disease || ||	TRUE	igd	0.001	Daytime_napping	TRUE	2.25718e-19	inferred	gyQlbY	textfile	2	1	TRUE	NA	NA	NA	NA	NA	NA	NA
Daytime_napping	45	rs2943023	C	T	C	T	0.007	0.0058	0.58	0.5562	FALSE	FALSE	FALSE	ieu-b-7	5	89597733	0.0183	482730	0.751	Parkinson's disease || id:ieu-b-7	Parkinson's disease	Parkinson's disease || ||	TRUE	igd	0.001	Daytime_napping	TRUE	2.55963e-12	inferred	gyQlbY	textfile	2	1	TRUE	NA	NA	NA	NA	NA	NA	NA
Daytime_napping	46	rs34262487	C	A	C	A	0.015	-0.0393	0.928	0.9181	FALSE	FALSE	FALSE	ieu-b-7	6	36224315	0.0342	482730	0.251	Parkinson's disease || id:ieu-b-7	Parkinson's disease	Parkinson's disease || ||	TRUE	igd	0.002	Daytime_napping	TRUE	6.38178e-14	inferred	gyQlbY	textfile	2	1	TRUE	NA	NA	NA	NA	NA	NA	NA
Daytime_napping	47	rs35039375	G	A	G	A	0.014	0.0153	0.092	0.0856	FALSE	FALSE	FALSE	ieu-b-7	1	171516863	0.034	482730	0.652501	Parkinson's disease || id:ieu-b-7	Parkinson's disease	Parkinson's disease || ||	TRUE	igd	0.002	Daytime_napping	TRUE	2.55963e-12	inferred	gyQlbY	textfile	2	1	TRUE	NA	NA	NA	NA	NA	NA	NA
Daytime_napping	48	rs351776	C	A	C	A	0.008	0.0219	0.55	0.5471	FALSE	FALSE	FALSE	ieu-b-7	8	28191306	0.0224	468692	0.3283	Parkinson's disease || id:ieu-b-7	Parkinson's disease	Parkinson's disease || ||	TRUE	igd	0.001	Daytime_napping	TRUE	1.24419e-15	inferred	gyQlbY	textfile	2	1	TRUE	NA	NA	NA	NA	NA	NA	NA
Daytime_napping	49	rs35851551	A	G	A	G	0.011	-0.0209	0.898	0.9035	FALSE	FALSE	FALSE	ieu-b-7	7	31330785	0.0382	468692	0.5835	Parkinson's disease || id:ieu-b-7	Parkinson's disease	Parkinson's disease || ||	TRUE	igd	0.002	Daytime_napping	TRUE	3.79791e-08	inferred	gyQlbY	textfile	2	1	TRUE	NA	NA	NA	NA	NA	NA	NA
Daytime_napping	50	rs3810484	A	G	A	G	0.007	0.0106	0.556	0.5656	FALSE	FALSE	FALSE	ieu-b-7	20	62194103	0.0178	482730	0.5498	Parkinson's disease || id:ieu-b-7	Parkinson's disease	Parkinson's disease || ||	TRUE	igd	0.001	Daytime_napping	TRUE	2.55963e-12	inferred	gyQlbY	textfile	2	1	TRUE	NA	NA	NA	NA	NA	NA	NA
Daytime_napping	51	rs385199	A	C	A	C	0.021	0.2531	0.772	0.765	FALSE	FALSE	FALSE	ieu-b-7	17	43707619	0.0272	480593	1.4471e-20	Parkinson's disease || id:ieu-b-7	Parkinson's disease	Parkinson's disease || ||	TRUE	igd	0.001	Daytime_napping	TRUE	6.55856e-98	inferred	gyQlbY	textfile	2	1	TRUE	TRUE	rs385199	rs681485	C	A	A	C
Daytime_napping	52	rs3935190	A	G	A	G	0.008	-0.0278	0.536	0.5303	FALSE	FALSE	FALSE	ieu-b-7	17	79084367	0.02	482730	0.1634	Parkinson's disease || id:ieu-b-7	Parkinson's disease	Parkinson's disease || ||	TRUE	igd	0.001	Daytime_napping	TRUE	1.24419e-15	inferred	gyQlbY	textfile	2	1	TRUE	NA	NA	NA	NA	NA	NA	NA
Daytime_napping	53	rs4356873	C	T	C	T	0.008	-0.0193	0.24	0.2491	FALSE	FALSE	FALSE	ieu-b-7	4	164216739	0.0257	468692	0.4524	Parkinson's disease || id:ieu-b-7	Parkinson's disease	Parkinson's disease || ||	TRUE	igd	0.001	Daytime_napping	TRUE	1.24419e-15	inferred	gyQlbY	textfile	2	1	TRUE	NA	NA	NA	NA	NA	NA	NA
Daytime_napping	54	rs4604518	G	A	G	A	0.007	0.0191	0.546	0.5449	FALSE	FALSE	FALSE	ieu-b-7	9	120555845	0.0224	468692	0.3937	Parkinson's disease || id:ieu-b-7	Parkinson's disease	Parkinson's disease || ||	TRUE	igd	0.001	Daytime_napping	TRUE	2.55963e-12	inferred	gyQlbY	textfile	2	1	TRUE	NA	NA	NA	NA	NA	NA	NA
Daytime_napping	55	rs4983329	A	C	A	C	0.008	0.0275	0.556	0.5609	FALSE	FALSE	FALSE	ieu-b-7	14	29218473	0.0226	468692	0.2238	Parkinson's disease || id:ieu-b-7	Parkinson's disease	Parkinson's disease || ||	TRUE	igd	0.001	Daytime_napping	TRUE	1.24419e-15	inferred	gyQlbY	textfile	2	1	TRUE	NA	NA	NA	NA	NA	NA	NA
Daytime_napping	56	rs528301822	T	A	T	A	0.008	0.0208	0.287	0.2663	FALSE	TRUE	FALSE	ieu-b-7	16	69404241	0.0216	482730	0.3366	Parkinson's disease || id:ieu-b-7	Parkinson's disease	Parkinson's disease || ||	TRUE	igd	0.001	Daytime_napping	TRUE	1.24419e-15	inferred	gyQlbY	textfile	2	1	TRUE	TRUE	rs528301822	rs12325060	T	A	A	G
Daytime_napping	57	rs60222088	C	A	C	A	0.011	0.0207	0.853	0.8393	FALSE	FALSE	FALSE	ieu-b-7	12	108334477	0.0301	468692	0.4933	Parkinson's disease || id:ieu-b-7	Parkinson's disease	Parkinson's disease || ||	TRUE	igd	0.002	Daytime_napping	TRUE	3.79791e-08	inferred	gyQlbY	textfile	2	1	TRUE	NA	NA	NA	NA	NA	NA	NA
Daytime_napping	58	rs60920123	G	A	G	A	0.008	0.0203	0.567	0.5695	FALSE	FALSE	FALSE	ieu-b-7	16	10134637	0.0198	481203	0.3061	Parkinson's disease || id:ieu-b-7	Parkinson's disease	Parkinson's disease || ||	TRUE	igd	0.001	Daytime_napping	TRUE	1.24419e-15	inferred	gyQlbY	textfile	2	1	TRUE	NA	NA	NA	NA	NA	NA	NA
Daytime_napping	59	rs614987	C	A	C	A	0.011	0.0106	0.614	0.5996	FALSE	FALSE	FALSE	ieu-b-7	6	124920871	0.023	468692	0.646001	Parkinson's disease || id:ieu-b-7	Parkinson's disease	Parkinson's disease || ||	TRUE	igd	0.001	Daytime_napping	TRUE	3.82132e-28	inferred	gyQlbY	textfile	2	1	TRUE	NA	NA	NA	NA	NA	NA	NA
Daytime_napping	60	rs62189006	A	G	A	G	0.012	0.0004	0.907	0.9007	FALSE	FALSE	FALSE	ieu-b-7	2	162573586	0.0374	468692	0.9907	Parkinson's disease || id:ieu-b-7	Parkinson's disease	Parkinson's disease || ||	TRUE	igd	0.002	Daytime_napping	TRUE	1.97318e-09	inferred	gyQlbY	textfile	2	1	TRUE	NA	NA	NA	NA	NA	NA	NA
Daytime_napping	61	rs62560863	T	C	T	C	0.011	-0.0205	0.1	0.1064	FALSE	FALSE	FALSE	ieu-b-7	9	34081331	0.0285	482730	0.4722	Parkinson's disease || id:ieu-b-7	Parkinson's disease	Parkinson's disease || ||	TRUE	igd	0.002	Daytime_napping	TRUE	3.79791e-08	inferred	gyQlbY	textfile	2	1	TRUE	NA	NA	NA	NA	NA	NA	NA
Daytime_napping	62	rs6452787	A	G	A	G	0.008	-0.0199	0.536	0.5187	FALSE	FALSE	FALSE	ieu-b-7	5	87712831	0.0221	468692	0.3677	Parkinson's disease || id:ieu-b-7	Parkinson's disease	Parkinson's disease || ||	TRUE	igd	0.001	Daytime_napping	TRUE	1.24419e-15	inferred	gyQlbY	textfile	2	1	TRUE	NA	NA	NA	NA	NA	NA	NA
Daytime_napping	63	rs6663012	T	G	T	G	0.007	0.0202	0.379	0.3777	FALSE	FALSE	FALSE	ieu-b-7	1	32091779	0.0173	482730	0.242	Parkinson's disease || id:ieu-b-7	Parkinson's disease	Parkinson's disease || ||	TRUE	igd	0.001	Daytime_napping	TRUE	2.55963e-12	inferred	gyQlbY	textfile	2	1	TRUE	NA	NA	NA	NA	NA	NA	NA
Daytime_napping	64	rs6919087	T	G	T	G	0.011	-0.0077	0.688	0.6947	FALSE	FALSE	FALSE	ieu-b-7	6	37699156	0.024	468692	0.747799	Parkinson's disease || id:ieu-b-7	Parkinson's disease	Parkinson's disease || ||	TRUE	igd	0.001	Daytime_napping	TRUE	3.82132e-28	inferred	gyQlbY	textfile	2	1	TRUE	NA	NA	NA	NA	NA	NA	NA
Daytime_napping	65	rs73817091	T	C	T	C	0.017	-0.0042	0.042	0.0418	FALSE	FALSE	FALSE	ieu-b-7	5	159042652	0.058	468692	0.9426	Parkinson's disease || id:ieu-b-7	Parkinson's disease	Parkinson's disease || ||	TRUE	igd	0.003	Daytime_napping	TRUE	1.45602e-08	inferred	gyQlbY	textfile	2	1	TRUE	NA	NA	NA	NA	NA	NA	NA
Daytime_napping	66	rs7422655	C	T	C	T	0.008	0.0044	0.263	0.2684	FALSE	FALSE	FALSE	ieu-b-7	2	208941004	0.0251	468692	0.8618	Parkinson's disease || id:ieu-b-7	Parkinson's disease	Parkinson's disease || ||	TRUE	igd	0.001	Daytime_napping	TRUE	1.24419e-15	inferred	gyQlbY	textfile	2	1	TRUE	NA	NA	NA	NA	NA	NA	NA
Daytime_napping	67	rs76824303	A	C	A	C	0.012	0.0064	0.901	0.8968	FALSE	FALSE	FALSE	ieu-b-7	3	62459819	0.0385	468692	0.8689	Parkinson's disease || id:ieu-b-7	Parkinson's disease	Parkinson's disease || ||	TRUE	igd	0.002	Daytime_napping	TRUE	1.97318e-09	inferred	gyQlbY	textfile	2	1	TRUE	NA	NA	NA	NA	NA	NA	NA
Daytime_napping	68	rs77154532	A	G	A	G	0.008	-0.0054	0.642	0.6318	FALSE	FALSE	FALSE	ieu-b-7	3	19377311	0.0206	482730	0.793601	Parkinson's disease || id:ieu-b-7	Parkinson's disease	Parkinson's disease || ||	TRUE	igd	0.001	Daytime_napping	TRUE	1.24419e-15	inferred	gyQlbY	textfile	2	1	TRUE	NA	NA	NA	NA	NA	NA	NA
Daytime_napping	69	rs7814873	C	T	C	T	0.007	-0.0423	0.383	0.3939	FALSE	FALSE	FALSE	ieu-b-7	8	142213997	0.0181	482730	0.0198002	Parkinson's disease || id:ieu-b-7	Parkinson's disease	Parkinson's disease || ||	TRUE	igd	0.001	Daytime_napping	TRUE	2.55963e-12	inferred	gyQlbY	textfile	2	1	TRUE	NA	NA	NA	NA	NA	NA	NA
Daytime_napping	70	rs80163246	C	T	C	T	0.012	0.0313	0.117	0.1174	FALSE	FALSE	FALSE	ieu-b-7	2	164574344	0.0354	468692	0.3765	Parkinson's disease || id:ieu-b-7	Parkinson's disease	Parkinson's disease || ||	TRUE	igd	0.002	Daytime_napping	TRUE	1.97318e-09	inferred	gyQlbY	textfile	2	1	TRUE	NA	NA	NA	NA	NA	NA	NA
Daytime_napping	71	rs910187	G	A	G	A	0.007	0.0378	0.626	0.6278	FALSE	FALSE	FALSE	ieu-b-7	20	45841052	0.0231	468692	0.1011	Parkinson's disease || id:ieu-b-7	Parkinson's disease	Parkinson's disease || ||	TRUE	igd	0.001	Daytime_napping	TRUE	2.55963e-12	inferred	gyQlbY	textfile	2	1	TRUE	NA	NA	NA	NA	NA	NA	NA
Daytime_napping	72	rs9309116	T	C	T	C	0.007	0.0247	0.653	0.6527	FALSE	FALSE	FALSE	ieu-b-7	2	44557919	0.0193	480593	0.2013	Parkinson's disease || id:ieu-b-7	Parkinson's disease	Parkinson's disease || ||	TRUE	igd	0.001	Daytime_napping	TRUE	2.55963e-12	inferred	gyQlbY	textfile	2	1	TRUE	NA	NA	NA	NA	NA	NA	NA
Daytime_napping	73	rs936944	G	A	G	A	0.009	-0.073	0.162	0.1452	FALSE	FALSE	FALSE	ieu-b-7	3	44385814	0.025	482730	0.00349398	Parkinson's disease || id:ieu-b-7	Parkinson's disease	Parkinson's disease || ||	TRUE	igd	0.002	Daytime_napping	TRUE	6.79535e-06	inferred	gyQlbY	textfile	2	1	TRUE	NA	NA	NA	NA	NA	NA	NA
Daytime_napping	74	rs9389556	G	C	G	C	0.008	0.017	0.261	0.2633	FALSE	TRUE	FALSE	ieu-b-7	6	100079774	0.0215	482730	0.4311	Parkinson's disease || id:ieu-b-7	Parkinson's disease	Parkinson's disease || ||	TRUE	igd	0.001	Daytime_napping	TRUE	1.24419e-15	inferred	gyQlbY	textfile	2	1	TRUE	NA	NA	NA	NA	NA	NA	NA
Daytime_napping	75	rs9460110	C	T	C	T	0.007	-0.0004	0.37	0.3637	FALSE	FALSE	FALSE	ieu-b-7	6	170621249	0.024	468692	0.9862	Parkinson's disease || id:ieu-b-7	Parkinson's disease	Parkinson's disease || ||	TRUE	igd	0.001	Daytime_napping	TRUE	2.55963e-12	inferred	gyQlbY	textfile	2	1	TRUE	NA	NA	NA	NA	NA	NA	NA
Daytime_napping	76	rs962247	G	A	G	A	0.008	-0.0178	0.523	0.5167	FALSE	FALSE	FALSE	ieu-b-7	18	23084118	0.0197	482730	0.3665	Parkinson's disease || id:ieu-b-7	Parkinson's disease	Parkinson's disease || ||	TRUE	igd	0.001	Daytime_napping	TRUE	1.24419e-15	inferred	gyQlbY	textfile	2	1	TRUE	NA	NA	NA	NA	NA	NA	NA
Daytime_napping	77	rs971415	A	G	A	G	0.011	-0.0086	0.878	0.869	FALSE	FALSE	FALSE	ieu-b-7	9	108846445	0.0324	470219	0.7916	Parkinson's disease || id:ieu-b-7	Parkinson's disease	Parkinson's disease || ||	TRUE	igd	0.002	Daytime_napping	TRUE	3.79791e-08	inferred	gyQlbY	textfile	2	1	TRUE	NA	NA	NA	NA	NA	NA	NA
Daytime_napping	78	rs9939355	C	T	C	T	0.007	0.0111	0.442	0.4479	FALSE	FALSE	FALSE	ieu-b-7	16	23837048	0.0226	468692	0.623199	Parkinson's disease || id:ieu-b-7	Parkinson's disease	Parkinson's disease || ||	TRUE	igd	0.001	Daytime_napping	TRUE	2.55963e-12	inferred	gyQlbY	textfile	2	1	TRUE	NA	NA	NA	NA	NA	NA	NA
Daytime_napping	79	rs9965170	G	A	G	A	0.014	0.0051	0.577	0.5677	FALSE	FALSE	FALSE	ieu-b-7	18	44788274	0.0181	482730	0.7779	Parkinson's disease || id:ieu-b-7	Parkinson's disease	Parkinson's disease || ||	TRUE	igd	0.001	Daytime_napping	TRUE	1.55871e-44	inferred	gyQlbY	textfile	2	1	TRUE	NA	NA	NA	NA	NA	NA	NA
Daytime_napping	80	rs9998136	G	C	G	C	0.009	-0.0051	0.747	0.7524	FALSE	TRUE	FALSE	ieu-b-7	4	79551592	0.0223	480593	0.8179	Parkinson's disease || id:ieu-b-7	Parkinson's disease	Parkinson's disease || ||	TRUE	igd	0.001	Daytime_napping	TRUE	2.25718e-19	inferred	gyQlbY	textfile	2	1	TRUE	TRUE	rs9998136	rs6854055	C	G	G	T
Daytime_sleepiness	1	rs11078398	A	G	A	G	0.008	-0.0475	0.333	0.2995	FALSE	FALSE	FALSE	ieu-b-7	17	17715101	0.0184	482730	0.00977192	Parkinson's disease || id:ieu-b-7	Parkinson's disease	Parkinson's disease || ||	TRUE	igd	0.001	Daytime_sleepiness	TRUE	1.24419e-15	inferred	j0z2Tc	textfile	2	1	TRUE	TRUE	rs11078398	rs11868035	A	G	A	G
Daytime_sleepiness	2	rs11123962	T	G	T	G	0.008	0.0152	0.51	0.5483	FALSE	FALSE	FALSE	ieu-b-7	2	104157011	0.0193	482730	0.4318	Parkinson's disease || id:ieu-b-7	Parkinson's disease	Parkinson's disease || ||	TRUE	igd	0.001	Daytime_sleepiness	TRUE	1.24419e-15	inferred	j0z2Tc	textfile	2	1	TRUE	NA	NA	NA	NA	NA	NA	NA
Daytime_sleepiness	3	rs11942333	G	A	G	A	0.006	0.041	0.659	0.6747	FALSE	FALSE	FALSE	ieu-b-7	4	46390250	0.0243	468692	0.0925103	Parkinson's disease || id:ieu-b-7	Parkinson's disease	Parkinson's disease || ||	TRUE	igd	0.001	Daytime_sleepiness	TRUE	1.97318e-09	inferred	j0z2Tc	textfile	2	1	TRUE	TRUE	rs11942333	rs10014579	A	G	G	A
Daytime_sleepiness	4	rs12140153	T	G	T	G	0.017	-0.0395	0.067	0.0821	FALSE	FALSE	FALSE	ieu-b-7	1	62579891	0.0314	482730	0.2082	Parkinson's disease || id:ieu-b-7	Parkinson's disease	Parkinson's disease || ||	TRUE	igd	0.002	Daytime_sleepiness	TRUE	1.89591e-17	inferred	j0z2Tc	textfile	2	1	TRUE	NA	NA	NA	NA	NA	NA	NA
Daytime_sleepiness	5	rs12153518	G	A	G	A	0.007	-0.0163	0.495	0.5112	FALSE	FALSE	FALSE	ieu-b-7	5	138501494	0.0181	482730	0.3697	Parkinson's disease || id:ieu-b-7	Parkinson's disease	Parkinson's disease || ||	TRUE	igd	0.001	Daytime_sleepiness	TRUE	2.55963e-12	inferred	j0z2Tc	textfile	2	1	TRUE	NA	NA	NA	NA	NA	NA	NA
Daytime_sleepiness	6	rs13010456	G	A	G	A	0.008	-0.007	0.365	0.3938	FALSE	FALSE	FALSE	ieu-b-7	2	236792801	0.0174	482730	0.6862	Parkinson's disease || id:ieu-b-7	Parkinson's disease	Parkinson's disease || ||	TRUE	igd	0.001	Daytime_sleepiness	TRUE	1.24419e-15	inferred	j0z2Tc	textfile	2	1	TRUE	NA	NA	NA	NA	NA	NA	NA
Daytime_sleepiness	7	rs13135092	A	G	A	G	0.01	0.0301	0.915	0.9172	FALSE	FALSE	FALSE	ieu-b-7	4	103198082	0.0315	482730	0.3395	Parkinson's disease || id:ieu-b-7	Parkinson's disease	Parkinson's disease || ||	TRUE	igd	0.002	Daytime_sleepiness	TRUE	5.73303e-07	inferred	j0z2Tc	textfile	2	1	TRUE	NA	NA	NA	NA	NA	NA	NA
Daytime_sleepiness	8	rs1566362	C	T	C	T	0.006	0.0244	0.353	0.3704	FALSE	FALSE	FALSE	ieu-b-7	9	128163132	0.0206	482730	0.2363	Parkinson's disease || id:ieu-b-7	Parkinson's disease	Parkinson's disease || ||	TRUE	igd	0.001	Daytime_sleepiness	TRUE	1.97318e-09	inferred	j0z2Tc	textfile	2	1	TRUE	NA	NA	NA	NA	NA	NA	NA
Daytime_sleepiness	9	rs17131124	C	G	C	G	0.011	0.1289	0.885	0.9091	FALSE	TRUE	FALSE	ieu-b-7	1	91127548	0.0403	468692	0.00138599	Parkinson's disease || id:ieu-b-7	Parkinson's disease	Parkinson's disease || ||	TRUE	igd	0.002	Daytime_sleepiness	TRUE	3.79791e-08	inferred	j0z2Tc	textfile	2	1	TRUE	NA	NA	NA	NA	NA	NA	NA
Daytime_sleepiness	10	rs17356118	A	G	A	G	0.008	0.0212	0.773	0.7722	FALSE	FALSE	FALSE	ieu-b-7	15	83237899	0.021	482730	0.3133	Parkinson's disease || id:ieu-b-7	Parkinson's disease	Parkinson's disease || ||	TRUE	igd	0.001	Daytime_sleepiness	TRUE	1.24419e-15	inferred	j0z2Tc	textfile	2	1	TRUE	NA	NA	NA	NA	NA	NA	NA
Daytime_sleepiness	11	rs1846644	T	C	T	C	0.011	0.0003	0.563	0.591	FALSE	FALSE	FALSE	ieu-b-7	12	117938380	0.0227	468692	0.9879	Parkinson's disease || id:ieu-b-7	Parkinson's disease	Parkinson's disease || ||	TRUE	igd	0.001	Daytime_sleepiness	TRUE	3.82132e-28	inferred	j0z2Tc	textfile	2	1	TRUE	NA	NA	NA	NA	NA	NA	NA
Daytime_sleepiness	12	rs2787120	G	A	G	A	0.008	-0.0545	0.19	0.1748	FALSE	FALSE	FALSE	ieu-b-7	1	33306297	0.026	482730	0.03571	Parkinson's disease || id:ieu-b-7	Parkinson's disease	Parkinson's disease || ||	TRUE	igd	0.001	Daytime_sleepiness	TRUE	1.24419e-15	inferred	j0z2Tc	textfile	2	1	TRUE	NA	NA	NA	NA	NA	NA	NA
Daytime_sleepiness	13	rs285793	A	G	A	G	0.007	-0.0161	0.543	0.5348	FALSE	FALSE	FALSE	ieu-b-7	8	106087862	0.0221	469220	0.4674	Parkinson's disease || id:ieu-b-7	Parkinson's disease	Parkinson's disease || ||	TRUE	igd	0.001	Daytime_sleepiness	TRUE	2.55963e-12	inferred	j0z2Tc	textfile	2	1	TRUE	NA	NA	NA	NA	NA	NA	NA
Daytime_sleepiness	14	rs3122170	A	C	A	C	0.01	0.0098	0.786	0.7838	FALSE	FALSE	FALSE	ieu-b-7	6	55058998	0.0207	482730	0.636601	Parkinson's disease || id:ieu-b-7	Parkinson's disease	Parkinson's disease || ||	TRUE	igd	0.001	Daytime_sleepiness	TRUE	1.52397e-23	inferred	j0z2Tc	textfile	2	1	TRUE	NA	NA	NA	NA	NA	NA	NA
Daytime_sleepiness	15	rs34478464	C	T	C	T	0.009	0.0313	0.791	0.8129	FALSE	FALSE	FALSE	ieu-b-7	3	84228726	0.0285	468692	0.2717	Parkinson's disease || id:ieu-b-7	Parkinson's disease	Parkinson's disease || ||	TRUE	igd	0.001	Daytime_sleepiness	TRUE	2.25718e-19	inferred	j0z2Tc	textfile	2	1	TRUE	NA	NA	NA	NA	NA	NA	NA
Daytime_sleepiness	16	rs4665972	C	T	C	T	0.007	0.0712	0.585	0.5805	FALSE	FALSE	FALSE	ieu-b-7	2	27598097	0.0179	482730	7.18406e-05	Parkinson's disease || id:ieu-b-7	Parkinson's disease	Parkinson's disease || ||	TRUE	igd	0.001	Daytime_sleepiness	TRUE	2.55963e-12	inferred	j0z2Tc	textfile	2	1	TRUE	NA	NA	NA	NA	NA	NA	NA
Daytime_sleepiness	17	rs55818482	T	C	T	C	0.01	-0.0139	0.801	0.7873	FALSE	FALSE	FALSE	ieu-b-7	9	81744922	0.0276	468692	0.613901	Parkinson's disease || id:ieu-b-7	Parkinson's disease	Parkinson's disease || ||	TRUE	igd	0.001	Daytime_sleepiness	TRUE	1.52397e-23	inferred	j0z2Tc	textfile	2	1	TRUE	NA	NA	NA	NA	NA	NA	NA
Daytime_sleepiness	18	rs55960940	C	T	C	T	0.008	-0.0436	0.175	0.1845	FALSE	FALSE	FALSE	ieu-b-7	6	38153146	0.0254	482730	0.0863495	Parkinson's disease || id:ieu-b-7	Parkinson's disease	Parkinson's disease || ||	TRUE	igd	0.001	Daytime_sleepiness	TRUE	1.24419e-15	inferred	j0z2Tc	textfile	2	1	TRUE	NA	NA	NA	NA	NA	NA	NA
Daytime_sleepiness	19	rs57746981	T	C	T	C	0.007	0.0159	0.384	0.38	FALSE	FALSE	FALSE	ieu-b-7	1	201885234	0.0182	482730	0.3838	Parkinson's disease || id:ieu-b-7	Parkinson's disease	Parkinson's disease || ||	TRUE	igd	0.001	Daytime_sleepiness	TRUE	2.55963e-12	inferred	j0z2Tc	textfile	2	1	TRUE	NA	NA	NA	NA	NA	NA	NA
Daytime_sleepiness	20	rs62519825	T	C	T	C	0.009	-0.0549	0.852	0.8808	FALSE	FALSE	FALSE	ieu-b-7	8	65479707	0.0278	482730	0.0485702	Parkinson's disease || id:ieu-b-7	Parkinson's disease	Parkinson's disease || ||	TRUE	igd	0.002	Daytime_sleepiness	TRUE	6.79535e-06	inferred	j0z2Tc	textfile	2	1	TRUE	NA	NA	NA	NA	NA	NA	NA
Daytime_sleepiness	21	rs6741951	A	G	A	G	0.007	-0.0054	0.267	0.2836	FALSE	FALSE	FALSE	ieu-b-7	2	58959112	0.0248	468692	0.8278	Parkinson's disease || id:ieu-b-7	Parkinson's disease	Parkinson's disease || ||	TRUE	igd	0.001	Daytime_sleepiness	TRUE	2.55963e-12	inferred	j0z2Tc	textfile	2	1	TRUE	NA	NA	NA	NA	NA	NA	NA
Daytime_sleepiness	22	rs6897863	C	A	C	A	0.006	-0.025	0.406	0.4007	FALSE	FALSE	FALSE	ieu-b-7	5	92515301	0.0171	482730	0.1446	Parkinson's disease || id:ieu-b-7	Parkinson's disease	Parkinson's disease || ||	TRUE	igd	0.001	Daytime_sleepiness	TRUE	1.97318e-09	inferred	j0z2Tc	textfile	2	1	TRUE	TRUE	rs6897863	rs7714485	C	A	C	A
Daytime_sleepiness	23	rs6923811	C	T	C	T	0.007	0.0187	0.331	0.3293	FALSE	FALSE	FALSE	ieu-b-7	6	27289776	0.0183	482730	0.3073	Parkinson's disease || id:ieu-b-7	Parkinson's disease	Parkinson's disease || ||	TRUE	igd	0.001	Daytime_sleepiness	TRUE	2.55963e-12	inferred	j0z2Tc	textfile	2	1	TRUE	NA	NA	NA	NA	NA	NA	NA
Daytime_sleepiness	24	rs7476897	A	G	A	G	0.007	-0.0057	0.289	0.317	FALSE	FALSE	FALSE	ieu-b-7	10	92416402	0.0239	468692	0.8122	Parkinson's disease || id:ieu-b-7	Parkinson's disease	Parkinson's disease || ||	TRUE	igd	0.001	Daytime_sleepiness	TRUE	2.55963e-12	inferred	j0z2Tc	textfile	2	1	TRUE	NA	NA	NA	NA	NA	NA	NA
Daytime_sleepiness	25	rs7598712	T	G	T	G	0.006	-0.0017	0.462	0.4441	FALSE	FALSE	FALSE	ieu-b-7	2	46660452	0.0189	480937	0.9275	Parkinson's disease || id:ieu-b-7	Parkinson's disease	Parkinson's disease || ||	TRUE	igd	0.001	Daytime_sleepiness	TRUE	1.97318e-09	inferred	j0z2Tc	textfile	2	1	TRUE	NA	NA	NA	NA	NA	NA	NA
Daytime_sleepiness	26	rs7607363	A	G	A	G	0.006	-0.019	0.577	0.5714	FALSE	FALSE	FALSE	ieu-b-7	2	213402705	0.0226	468692	0.4019	Parkinson's disease || id:ieu-b-7	Parkinson's disease	Parkinson's disease || ||	TRUE	igd	0.001	Daytime_sleepiness	TRUE	1.97318e-09	inferred	j0z2Tc	textfile	2	1	TRUE	NA	NA	NA	NA	NA	NA	NA
Daytime_sleepiness	27	rs7837226	A	G	A	G	0.006	-0.0014	0.468	0.473	FALSE	FALSE	FALSE	ieu-b-7	8	131235895	0.0184	482730	0.9383	Parkinson's disease || id:ieu-b-7	Parkinson's disease	Parkinson's disease || ||	TRUE	igd	0.001	Daytime_sleepiness	TRUE	1.97318e-09	inferred	j0z2Tc	textfile	2	1	TRUE	NA	NA	NA	NA	NA	NA	NA
Daytime_sleepiness	28	rs8015449	G	A	G	A	0.006	-0.0255	0.42	0.4605	FALSE	FALSE	FALSE	ieu-b-7	14	82161860	0.0224	468692	0.2538	Parkinson's disease || id:ieu-b-7	Parkinson's disease	Parkinson's disease || ||	TRUE	igd	0.001	Daytime_sleepiness	TRUE	1.97318e-09	inferred	j0z2Tc	textfile	2	1	TRUE	NA	NA	NA	NA	NA	NA	NA
Daytime_sleepiness	29	rs825127	G	T	G	T	0.006	-0.0245	0.473	0.47	FALSE	FALSE	FALSE	ieu-b-7	1	223506788	0.0191	482730	0.2006	Parkinson's disease || id:ieu-b-7	Parkinson's disease	Parkinson's disease || ||	TRUE	igd	0.001	Daytime_sleepiness	TRUE	1.97318e-09	inferred	j0z2Tc	textfile	2	1	TRUE	NA	NA	NA	NA	NA	NA	NA
Daytime_sleepiness	30	rs843372	T	C	T	C	0.008	0.0633	0.791	0.7808	FALSE	FALSE	FALSE	ieu-b-7	3	183996213	0.0207	482730	0.00221299	Parkinson's disease || id:ieu-b-7	Parkinson's disease	Parkinson's disease || ||	TRUE	igd	0.001	Daytime_sleepiness	TRUE	1.24419e-15	inferred	j0z2Tc	textfile	2	1	TRUE	NA	NA	NA	NA	NA	NA	NA
Daytime_sleepiness	31	rs886114	T	C	T	C	0.006	-0.0228	0.642	0.6469	FALSE	FALSE	FALSE	ieu-b-7	16	23866223	0.0208	482730	0.2729	Parkinson's disease || id:ieu-b-7	Parkinson's disease	Parkinson's disease || ||	TRUE	igd	0.001	Daytime_sleepiness	TRUE	1.97318e-09	inferred	j0z2Tc	textfile	2	1	TRUE	TRUE	rs886114	rs8056879	C	T	A	G
Daytime_sleepiness	32	rs9712275	C	T	C	T	0.006	0.0097	0.438	0.4711	FALSE	FALSE	FALSE	ieu-b-7	2	198907143	0.0169	482730	0.5681	Parkinson's disease || id:ieu-b-7	Parkinson's disease	Parkinson's disease || ||	TRUE	igd	0.001	Daytime_sleepiness	TRUE	1.97318e-09	inferred	j0z2Tc	textfile	2	1	TRUE	NA	NA	NA	NA	NA	NA	NA
Frequent_insomnia	1	rs10156602	A	G	A	G	0.039	-0.0332	0.638	0.6378	FALSE	FALSE	FALSE	ieu-b-7	9	96345328	0.019	482730	0.08085	Parkinson's disease || id:ieu-b-7	Parkinson's disease	Parkinson's disease || ||	TRUE	igd	0.005	Frequent_insomnia	TRUE	6.19072e-15	inferred	iGNFTP	textfile	2	1	TRUE	NA	NA	NA	NA	NA	NA	NA
Frequent_insomnia	2	rs10838708	G	A	G	A	0.03	-0.0301	0.541	0.5382	FALSE	FALSE	FALSE	ieu-b-7	11	47441513	0.0174	482730	0.0840001	Parkinson's disease || id:ieu-b-7	Parkinson's disease	Parkinson's disease || ||	TRUE	igd	0.005	Frequent_insomnia	TRUE	1.97318e-09	inferred	iGNFTP	textfile	2	1	TRUE	NA	NA	NA	NA	NA	NA	NA
Frequent_insomnia	3	rs10947690	G	A	G	A	0.039	-0.0086	0.261	0.2349	FALSE	FALSE	FALSE	ieu-b-7	6	37631768	0.0202	482730	0.6688	Parkinson's disease || id:ieu-b-7	Parkinson's disease	Parkinson's disease || ||	TRUE	igd	0.01	Frequent_insomnia	TRUE	9.61927e-05	inferred	iGNFTP	textfile	2	1	TRUE	NA	NA	NA	NA	NA	NA	NA
Frequent_insomnia	4	rs11097861	G	A	G	A	0.039	0.0282	0.715	0.7137	FALSE	FALSE	FALSE	ieu-b-7	4	105330133	0.0245	468692	0.2496	Parkinson's disease || id:ieu-b-7	Parkinson's disease	Parkinson's disease || ||	TRUE	igd	0.005	Frequent_insomnia	TRUE	6.19072e-15	inferred	iGNFTP	textfile	2	1	TRUE	NA	NA	NA	NA	NA	NA	NA
Frequent_insomnia	5	rs11184946	T	C	T	C	0.03	0.0075	0.417	0.4154	FALSE	FALSE	FALSE	ieu-b-7	1	107185225	0.0224	469691	0.738501	Parkinson's disease || id:ieu-b-7	Parkinson's disease	Parkinson's disease || ||	TRUE	igd	0.007	Frequent_insomnia	TRUE	1.82153e-05	inferred	iGNFTP	textfile	2	1	TRUE	NA	NA	NA	NA	NA	NA	NA
Frequent_insomnia	6	rs113851554	T	G	T	G	0.182	-0.0295	0.058	0.0549	FALSE	FALSE	FALSE	ieu-b-7	2	66750564	0.0522	468692	0.5718	Parkinson's disease || id:ieu-b-7	Parkinson's disease	Parkinson's disease || ||	TRUE	igd	0.017	Frequent_insomnia	TRUE	9.55163e-27	inferred	iGNFTP	textfile	2	1	TRUE	NA	NA	NA	NA	NA	NA	NA
Frequent_insomnia	7	rs11635495	C	T	C	T	0.039	-0.0054	0.515	0.5006	FALSE	FALSE	FALSE	ieu-b-7	15	67804682	0.0176	482730	0.7603	Parkinson's disease || id:ieu-b-7	Parkinson's disease	Parkinson's disease || ||	TRUE	igd	0.007	Frequent_insomnia	TRUE	2.52659e-08	inferred	iGNFTP	textfile	2	1	TRUE	NA	NA	NA	NA	NA	NA	NA
Frequent_insomnia	8	rs11651809	G	C	G	C	0.049	0.0188	0.296	0.2993	FALSE	TRUE	FALSE	ieu-b-7	17	43255681	0.0197	482730	0.3405	Parkinson's disease || id:ieu-b-7	Parkinson's disease	Parkinson's disease || ||	TRUE	igd	0.007	Frequent_insomnia	TRUE	2.55963e-12	inferred	iGNFTP	textfile	2	1	TRUE	NA	NA	NA	NA	NA	NA	NA
Frequent_insomnia	9	rs11673344	G	A	G	A	0.039	0.0365	0.38	0.3567	FALSE	FALSE	FALSE	ieu-b-7	19	37684966	0.0176	482730	0.0384096	Parkinson's disease || id:ieu-b-7	Parkinson's disease	Parkinson's disease || ||	TRUE	igd	0.007	Frequent_insomnia	TRUE	2.52659e-08	inferred	iGNFTP	textfile	2	1	TRUE	NA	NA	NA	NA	NA	NA	NA
Frequent_insomnia	10	rs11804386	A	G	A	G	0.039	-0.0026	0.332	0.3191	FALSE	FALSE	FALSE	ieu-b-7	1	87738947	0.0184	482730	0.887	Parkinson's disease || id:ieu-b-7	Parkinson's disease	Parkinson's disease || ||	TRUE	igd	0.007	Frequent_insomnia	TRUE	2.52659e-08	inferred	iGNFTP	textfile	2	1	TRUE	NA	NA	NA	NA	NA	NA	NA
Frequent_insomnia	11	rs12405761	A	C	A	C	0.039	0.0424	0.571	0.5644	FALSE	FALSE	FALSE	ieu-b-7	1	57850914	0.0242	466555	0.0797793	Parkinson's disease || id:ieu-b-7	Parkinson's disease	Parkinson's disease || ||	TRUE	igd	0.005	Frequent_insomnia	TRUE	6.19072e-15	inferred	iGNFTP	textfile	2	1	TRUE	NA	NA	NA	NA	NA	NA	NA
Frequent_insomnia	12	rs1430205	T	C	T	C	0.03	0.0245	0.458	0.4763	FALSE	FALSE	FALSE	ieu-b-7	5	87678585	0.0222	468692	0.2699	Parkinson's disease || id:ieu-b-7	Parkinson's disease	Parkinson's disease || ||	TRUE	igd	0.007	Frequent_insomnia	TRUE	1.82153e-05	inferred	iGNFTP	textfile	2	1	TRUE	NA	NA	NA	NA	NA	NA	NA
Frequent_insomnia	13	rs1544637	T	C	T	C	0.03	0.0032	0.488	0.5275	FALSE	FALSE	FALSE	ieu-b-7	16	51484837	0.0212	480409	0.8818	Parkinson's disease || id:ieu-b-7	Parkinson's disease	Parkinson's disease || ||	TRUE	igd	0.005	Frequent_insomnia	TRUE	1.97318e-09	inferred	iGNFTP	textfile	2	1	TRUE	NA	NA	NA	NA	NA	NA	NA
Frequent_insomnia	14	rs17139246	C	T	C	T	0.03	0.0021	0.389	0.3995	FALSE	FALSE	FALSE	ieu-b-7	16	6106260	0.0215	480593	0.9232	Parkinson's disease || id:ieu-b-7	Parkinson's disease	Parkinson's disease || ||	TRUE	igd	0.007	Frequent_insomnia	TRUE	1.82153e-05	inferred	iGNFTP	textfile	2	1	TRUE	NA	NA	NA	NA	NA	NA	NA
Frequent_insomnia	15	rs17151854	T	G	T	G	0.058	0.0096	0.154	0.1442	FALSE	FALSE	FALSE	ieu-b-7	8	10236559	0.0289	482730	0.7406	Parkinson's disease || id:ieu-b-7	Parkinson's disease	Parkinson's disease || ||	TRUE	igd	0.01	Frequent_insomnia	TRUE	6.63149e-09	inferred	iGNFTP	textfile	2	1	TRUE	NA	NA	NA	NA	NA	NA	NA
Frequent_insomnia	16	rs17669584	G	A	G	A	0.039	0.0033	0.195	0.1902	FALSE	FALSE	FALSE	ieu-b-7	17	28899614	0.0295	468692	0.912	Parkinson's disease || id:ieu-b-7	Parkinson's disease	Parkinson's disease || ||	TRUE	igd	0.007	Frequent_insomnia	TRUE	2.52659e-08	inferred	iGNFTP	textfile	2	1	TRUE	NA	NA	NA	NA	NA	NA	NA
Frequent_insomnia	17	rs1841625	G	A	G	A	0.03	0.0351	0.432	0.4347	FALSE	FALSE	FALSE	ieu-b-7	4	91287477	0.0185	482730	0.0584198	Parkinson's disease || id:ieu-b-7	Parkinson's disease	Parkinson's disease || ||	TRUE	igd	0.007	Frequent_insomnia	TRUE	1.82153e-05	inferred	iGNFTP	textfile	2	1	TRUE	NA	NA	NA	NA	NA	NA	NA
Frequent_insomnia	18	rs1923770	T	A	T	A	0.049	0.0194	0.383	0.3775	FALSE	TRUE	FALSE	ieu-b-7	13	53786568	0.0177	482730	0.2741	Parkinson's disease || id:ieu-b-7	Parkinson's disease	Parkinson's disease || ||	TRUE	igd	0.007	Frequent_insomnia	TRUE	2.55963e-12	inferred	iGNFTP	textfile	2	1	TRUE	NA	NA	NA	NA	NA	NA	NA
Frequent_insomnia	19	rs1942262	A	G	A	G	0.039	0.0022	0.292	0.346	FALSE	FALSE	FALSE	ieu-b-7	18	52873317	0.0211	482730	0.9169	Parkinson's disease || id:ieu-b-7	Parkinson's disease	Parkinson's disease || ||	TRUE	igd	0.007	Frequent_insomnia	TRUE	2.52659e-08	inferred	iGNFTP	textfile	2	1	TRUE	NA	NA	NA	NA	NA	NA	NA
Frequent_insomnia	20	rs2296580	G	T	G	T	0.049	-0.0002	0.702	0.71	FALSE	FALSE	FALSE	ieu-b-7	10	104241683	0.0195	482730	0.9927	Parkinson's disease || id:ieu-b-7	Parkinson's disease	Parkinson's disease || ||	TRUE	igd	0.01	Frequent_insomnia	TRUE	9.58367e-07	inferred	iGNFTP	textfile	2	1	TRUE	NA	NA	NA	NA	NA	NA	NA
Frequent_insomnia	21	rs28061	A	G	A	G	0.039	0.049	0.692	0.7092	FALSE	FALSE	FALSE	ieu-b-7	5	102549721	0.02	480593	0.0141101	Parkinson's disease || id:ieu-b-7	Parkinson's disease	Parkinson's disease || ||	TRUE	igd	0.007	Frequent_insomnia	TRUE	2.52659e-08	inferred	iGNFTP	textfile	2	1	TRUE	TRUE	rs28061	rs26258	G	A	C	A
Frequent_insomnia	22	rs2956278	G	A	G	A	0.049	-0.0145	0.215	0.2246	FALSE	FALSE	FALSE	ieu-b-7	12	84698234	0.0227	482730	0.523801	Parkinson's disease || id:ieu-b-7	Parkinson's disease	Parkinson's disease || ||	TRUE	igd	0.01	Frequent_insomnia	TRUE	9.58367e-07	inferred	iGNFTP	textfile	2	1	TRUE	NA	NA	NA	NA	NA	NA	NA
Frequent_insomnia	23	rs314280	G	A	G	A	0.039	0.0146	0.548	0.5544	FALSE	FALSE	FALSE	ieu-b-7	6	105400837	0.0179	482730	0.4159	Parkinson's disease || id:ieu-b-7	Parkinson's disease	Parkinson's disease || ||	TRUE	igd	0.007	Frequent_insomnia	TRUE	2.52659e-08	inferred	iGNFTP	textfile	2	1	TRUE	NA	NA	NA	NA	NA	NA	NA
Frequent_insomnia	24	rs324017	A	C	A	C	0.049	0.0058	0.295	0.2405	FALSE	FALSE	FALSE	ieu-b-7	12	57490100	0.0218	482730	0.7914	Parkinson's disease || id:ieu-b-7	Parkinson's disease	Parkinson's disease || ||	TRUE	igd	0.007	Frequent_insomnia	TRUE	2.55963e-12	inferred	iGNFTP	textfile	2	1	TRUE	TRUE	rs324017	rs324015	A	C	T	C
Frequent_insomnia	25	rs3824081	T	C	T	C	0.039	0.0062	0.475	0.4854	FALSE	FALSE	FALSE	ieu-b-7	7	1024581	0.0173	482730	0.7204	Parkinson's disease || id:ieu-b-7	Parkinson's disease	Parkinson's disease || ||	TRUE	igd	0.007	Frequent_insomnia	TRUE	2.52659e-08	inferred	iGNFTP	textfile	2	1	TRUE	NA	NA	NA	NA	NA	NA	NA
Frequent_insomnia	26	rs4688760	T	C	T	C	0.049	0.0038	0.69	0.6774	FALSE	FALSE	FALSE	ieu-b-7	3	49980596	0.0182	482730	0.8343	Parkinson's disease || id:ieu-b-7	Parkinson's disease	Parkinson's disease || ||	TRUE	igd	0.007	Frequent_insomnia	TRUE	2.55963e-12	inferred	iGNFTP	textfile	2	1	TRUE	NA	NA	NA	NA	NA	NA	NA
Frequent_insomnia	27	rs4751	T	G	T	G	0.03	0.0028	0.425	0.4235	FALSE	FALSE	FALSE	ieu-b-7	1	1686040	0.0199	482730	0.8879	Parkinson's disease || id:ieu-b-7	Parkinson's disease	Parkinson's disease || ||	TRUE	igd	0.007	Frequent_insomnia	TRUE	1.82153e-05	inferred	iGNFTP	textfile	2	1	TRUE	NA	NA	NA	NA	NA	NA	NA
Frequent_insomnia	28	rs4886860	G	C	G	C	0.049	-0.0178	0.234	0.2192	FALSE	TRUE	FALSE	ieu-b-7	15	74340336	0.023	482730	0.4378	Parkinson's disease || id:ieu-b-7	Parkinson's disease	Parkinson's disease || ||	TRUE	igd	0.007	Frequent_insomnia	TRUE	2.55963e-12	inferred	iGNFTP	textfile	2	1	TRUE	NA	NA	NA	NA	NA	NA	NA
Frequent_insomnia	29	rs62158170	A	G	A	G	0.049	0.0333	0.784	0.7875	FALSE	FALSE	FALSE	ieu-b-7	2	114082175	0.0276	468692	0.2269	Parkinson's disease || id:ieu-b-7	Parkinson's disease	Parkinson's disease || ||	TRUE	igd	0.01	Frequent_insomnia	TRUE	9.58367e-07	inferred	iGNFTP	textfile	2	1	TRUE	NA	NA	NA	NA	NA	NA	NA
Frequent_insomnia	30	rs6593005	G	A	G	A	0.03	0.0148	0.741	0.7475	FALSE	FALSE	FALSE	ieu-b-7	7	52584625	0.0255	468692	0.5615	Parkinson's disease || id:ieu-b-7	Parkinson's disease	Parkinson's disease || ||	TRUE	igd	0.007	Frequent_insomnia	TRUE	1.82153e-05	inferred	iGNFTP	textfile	2	1	TRUE	NA	NA	NA	NA	NA	NA	NA
Frequent_insomnia	31	rs6664467	G	A	G	A	0.049	0.0592	0.863	0.8727	FALSE	FALSE	FALSE	ieu-b-7	1	151738403	0.026	482730	0.0226699	Parkinson's disease || id:ieu-b-7	Parkinson's disease	Parkinson's disease || ||	TRUE	igd	0.007	Frequent_insomnia	TRUE	2.55963e-12	inferred	iGNFTP	textfile	2	1	TRUE	NA	NA	NA	NA	NA	NA	NA
Frequent_insomnia	32	rs68094047	T	C	T	C	0.039	-0.0325	0.25	0.2574	FALSE	FALSE	FALSE	ieu-b-7	12	109855201	0.0207	482730	0.1166	Parkinson's disease || id:ieu-b-7	Parkinson's disease	Parkinson's disease || ||	TRUE	igd	0.007	Frequent_insomnia	TRUE	2.52659e-08	inferred	iGNFTP	textfile	2	1	TRUE	NA	NA	NA	NA	NA	NA	NA
Frequent_insomnia	33	rs7711696	T	G	T	G	0.049	0.0158	0.305	0.3106	FALSE	FALSE	FALSE	ieu-b-7	5	135486536	0.0242	468692	0.5144	Parkinson's disease || id:ieu-b-7	Parkinson's disease	Parkinson's disease || ||	TRUE	igd	0.007	Frequent_insomnia	TRUE	2.55963e-12	inferred	iGNFTP	textfile	2	1	TRUE	NA	NA	NA	NA	NA	NA	NA
Frequent_insomnia	34	rs9845387	C	A	C	A	0.095	0.1308	0.959	0.9622	FALSE	FALSE	FALSE	ieu-b-7	3	116425935	0.0624	468692	0.0361901	Parkinson's disease || id:ieu-b-7	Parkinson's disease	Parkinson's disease || ||	TRUE	igd	0.019	Frequent_insomnia	TRUE	5.73303e-07	inferred	iGNFTP	textfile	2	1	TRUE	NA	NA	NA	NA	NA	NA	NA
Long_sleep_duration	1	rs10899257	A	G	A	G	0.068	-0.0163	0.144	0.146	FALSE	FALSE	FALSE	ieu-b-7	11	76415209	0.0276	482730	0.5543	Parkinson's disease || id:ieu-b-7	Parkinson's disease	Parkinson's disease || ||	TRUE	igd	0.013	Long_sleep_duration	TRUE	1.68806e-07	inferred	SUx5f7	textfile	2	1	TRUE	NA	NA	NA	NA	NA	NA	NA
Long_sleep_duration	2	rs17688916	T	A	T	A	0.071	0.2485	0.796	0.7984	FALSE	TRUE	FALSE	ieu-b-7	17	43778680	0.0284	480593	2.22895e-18	Parkinson's disease || id:ieu-b-7	Parkinson's disease	Parkinson's disease || ||	TRUE	igd	0.012	Long_sleep_duration	TRUE	3.28532e-09	inferred	SUx5f7	textfile	2	1	TRUE	NA	NA	NA	NA	NA	NA	NA
Long_sleep_duration	3	rs17817288	A	G	A	G	0.039	0.0162	0.518	0.5015	FALSE	FALSE	FALSE	ieu-b-7	16	53807764	0.0169	482730	0.3363	Parkinson's disease || id:ieu-b-7	Parkinson's disease	Parkinson's disease || ||	TRUE	igd	0.009	Long_sleep_duration	TRUE	1.46868e-05	inferred	SUx5f7	textfile	2	1	TRUE	NA	NA	NA	NA	NA	NA	NA
Long_sleep_duration	4	rs3751046	G	A	G	A	0.07	-0.0033	0.147	0.1441	FALSE	FALSE	FALSE	ieu-b-7	11	122828342	0.0346	466555	0.925	Parkinson's disease || id:ieu-b-7	Parkinson's disease	Parkinson's disease || ||	TRUE	igd	0.013	Long_sleep_duration	TRUE	7.25997e-08	inferred	SUx5f7	textfile	2	1	TRUE	NA	NA	NA	NA	NA	NA	NA
Long_sleep_duration	5	rs6737318	G	A	G	A	0.076	-0.0304	0.222	0.2186	FALSE	FALSE	FALSE	ieu-b-7	2	114083120	0.0272	468692	0.2648	Parkinson's disease || id:ieu-b-7	Parkinson's disease	Parkinson's disease || ||	TRUE	igd	0.011	Long_sleep_duration	TRUE	4.87769e-12	inferred	SUx5f7	textfile	2	1	TRUE	NA	NA	NA	NA	NA	NA	NA
Long_sleep_duration	6	rs7534398	A	T	A	T	0.047	0.0423	0.201	0.2051	FALSE	TRUE	FALSE	ieu-b-7	1	7767464	0.0278	468692	0.1273	Parkinson's disease || id:ieu-b-7	Parkinson's disease	Parkinson's disease || ||	TRUE	igd	0.012	Long_sleep_duration	TRUE	8.97818e-05	inferred	SUx5f7	textfile	2	1	TRUE	NA	NA	NA	NA	NA	NA	NA
Long_sleep_duration	7	rs75458655	T	C	T	C	0.185	-0.0875	0.023	0.0225	FALSE	FALSE	FALSE	ieu-b-7	11	118115331	0.0692	482730	0.2065	Parkinson's disease || id:ieu-b-7	Parkinson's disease	Parkinson's disease || ||	TRUE	igd	0.029	Long_sleep_duration	TRUE	1.77887e-10	inferred	SUx5f7	textfile	2	1	TRUE	NA	NA	NA	NA	NA	NA	NA
OSA	1	rs10507084	C	T	C	T	0.104	-0.0274	0.18	0.9219	FALSE	FALSE	FALSE	ieu-b-7	12	97753152	0.0447	468692	0.5399	Parkinson's disease || id:ieu-b-7	Parkinson's disease	Parkinson's disease || ||	TRUE	igd	0.016	OSA	TRUE	8.032e-11	inferred	zS0LIY	textfile	2	1	TRUE	NA	NA	NA	NA	NA	NA	NA
OSA	2	rs10928560	C	T	C	T	-0.083	-0.0069	0.2	0.7756	FALSE	FALSE	FALSE	ieu-b-7	2	136991807	0.0228	482730	0.762	Parkinson's disease || id:ieu-b-7	Parkinson's disease	Parkinson's disease || ||	TRUE	igd	0.014	OSA	TRUE	3.05581e-09	inferred	zS0LIY	textfile	2	1	TRUE	NA	NA	NA	NA	NA	NA	NA
OSA	3	rs4837016	G	A	G	A	-0.073	-0.0299	0.47	0.5688	FALSE	FALSE	FALSE	ieu-b-7	9	128141809	0.0203	482730	0.1421	Parkinson's disease || id:ieu-b-7	Parkinson's disease	Parkinson's disease || ||	TRUE	igd	0.011	OSA	TRUE	3.21516e-11	inferred	zS0LIY	textfile	2	1	TRUE	NA	NA	NA	NA	NA	NA	NA
OSA	4	rs9937053	G	A	G	A	0.104	0.0033	0.43	0.5663	FALSE	FALSE	FALSE	ieu-b-7	16	53799507	0.017	482730	0.8443	Parkinson's disease || id:ieu-b-7	Parkinson's disease	Parkinson's disease || ||	TRUE	igd	0.012	OSA	TRUE	4.44955e-18	inferred	zS0LIY	textfile	2	1	TRUE	NA	NA	NA	NA	NA	NA	NA
Short_sleep_duration	1	rs11763750	G	A	G	A	0.035	0.009	0.814	0.7921	FALSE	FALSE	FALSE	ieu-b-7	7	2080114	0.0238	482730	0.704399	Parkinson's disease || id:ieu-b-7	Parkinson's disease	Parkinson's disease || ||	TRUE	igd	0.008	Short_sleep_duration	TRUE	1.21432e-05	inferred	VGa1SG	textfile	2	1	TRUE	NA	NA	NA	NA	NA	NA	NA
Short_sleep_duration	2	rs1229762	T	C	T	C	0.037	0.0161	0.665	0.6444	FALSE	FALSE	FALSE	ieu-b-7	7	114218582	0.0229	471013	0.4819	Parkinson's disease || id:ieu-b-7	Parkinson's disease	Parkinson's disease || ||	TRUE	igd	0.003	Short_sleep_duration	TRUE	5.99159e-35	inferred	VGa1SG	textfile	2	1	TRUE	NA	NA	NA	NA	NA	NA	NA
Short_sleep_duration	3	rs12518468	C	T	C	T	0.031	-0.0123	0.328	0.3365	FALSE	FALSE	FALSE	ieu-b-7	5	7249696	0.0235	468692	0.6008	Parkinson's disease || id:ieu-b-7	Parkinson's disease	Parkinson's disease || ||	TRUE	igd	0.006	Short_sleep_duration	TRUE	2.38306e-07	inferred	VGa1SG	textfile	2	1	TRUE	NA	NA	NA	NA	NA	NA	NA
Short_sleep_duration	4	rs12567114	G	A	G	A	0.036	0.0037	0.725	0.7192	FALSE	FALSE	FALSE	ieu-b-7	1	98527951	0.0251	468692	0.8829	Parkinson's disease || id:ieu-b-7	Parkinson's disease	Parkinson's disease || ||	TRUE	igd	0.007	Short_sleep_duration	TRUE	2.70591e-07	inferred	VGa1SG	textfile	2	1	TRUE	NA	NA	NA	NA	NA	NA	NA
Short_sleep_duration	5	rs12661667	T	C	T	C	0.028	0.0095	0.263	0.2563	FALSE	FALSE	FALSE	ieu-b-7	6	41792545	0.0211	482730	0.654	Parkinson's disease || id:ieu-b-7	Parkinson's disease	Parkinson's disease || ||	TRUE	igd	0.007	Short_sleep_duration	TRUE	6.33425e-05	inferred	VGa1SG	textfile	2	1	TRUE	NA	NA	NA	NA	NA	NA	NA
Short_sleep_duration	6	rs13107325	T	C	T	C	0.075	-0.0311	0.075	0.0751	FALSE	FALSE	FALSE	ieu-b-7	4	103188709	0.032	482730	0.3311	Parkinson's disease || id:ieu-b-7	Parkinson's disease	Parkinson's disease || ||	TRUE	igd	0.011	Short_sleep_duration	TRUE	9.21999e-12	inferred	VGa1SG	textfile	2	1	TRUE	NA	NA	NA	NA	NA	NA	NA
Short_sleep_duration	7	rs1380703	G	A	G	A	0.035	0.0136	0.384	0.3746	FALSE	FALSE	FALSE	ieu-b-7	2	57941287	0.0272	15448	0.617999	Parkinson's disease || id:ieu-b-7	Parkinson's disease	Parkinson's disease || ||	TRUE	igd	0.006	Short_sleep_duration	TRUE	5.43309e-09	inferred	VGa1SG	textfile	2	1	TRUE	NA	NA	NA	NA	NA	NA	NA
Short_sleep_duration	8	rs1607227	G	T	G	T	0.031	0.0448	0.705	0.7065	FALSE	FALSE	FALSE	ieu-b-7	11	28808617	0.0248	468692	0.0708402	Parkinson's disease || id:ieu-b-7	Parkinson's disease	Parkinson's disease || ||	TRUE	igd	0.007	Short_sleep_duration	TRUE	9.48593e-06	inferred	VGa1SG	textfile	2	1	TRUE	NA	NA	NA	NA	NA	NA	NA
Short_sleep_duration	9	rs17005118	A	G	A	G	0.03	-0.0013	0.265	0.2631	FALSE	FALSE	FALSE	ieu-b-7	4	82288564	0.0206	482730	0.9494	Parkinson's disease || id:ieu-b-7	Parkinson's disease	Parkinson's disease || ||	TRUE	igd	0.007	Short_sleep_duration	TRUE	1.82153e-05	inferred	VGa1SG	textfile	2	1	TRUE	NA	NA	NA	NA	NA	NA	NA
Short_sleep_duration	10	rs17388803	C	A	C	A	0.053	0.0242	0.106	0.1179	FALSE	FALSE	FALSE	ieu-b-7	15	48027204	0.0359	468692	0.5009	Parkinson's disease || id:ieu-b-7	Parkinson's disease	Parkinson's disease || ||	TRUE	igd	0.01	Short_sleep_duration	TRUE	1.15803e-07	inferred	VGa1SG	textfile	2	1	TRUE	NA	NA	NA	NA	NA	NA	NA
Short_sleep_duration	11	rs2014830	C	T	C	T	0.03	0.0052	0.698	0.6813	FALSE	FALSE	FALSE	ieu-b-7	3	50172397	0.0184	482730	0.7776	Parkinson's disease || id:ieu-b-7	Parkinson's disease	Parkinson's disease || ||	TRUE	igd	0.006	Short_sleep_duration	TRUE	5.73303e-07	inferred	VGa1SG	textfile	2	1	TRUE	NA	NA	NA	NA	NA	NA	NA
Short_sleep_duration	12	rs205024	C	T	C	T	0.031	0.0059	0.617	0.61	FALSE	FALSE	FALSE	ieu-b-7	17	11227352	0.0227	469486	0.7934	Parkinson's disease || id:ieu-b-7	Parkinson's disease	Parkinson's disease || ||	TRUE	igd	0.006	Short_sleep_duration	TRUE	2.38306e-07	inferred	VGa1SG	textfile	2	1	TRUE	NA	NA	NA	NA	NA	NA	NA
Short_sleep_duration	13	rs2820313	G	A	G	A	0.031	-0.0269	0.341	0.3089	FALSE	FALSE	FALSE	ieu-b-7	1	201870221	0.0181	482730	0.1379	Parkinson's disease || id:ieu-b-7	Parkinson's disease	Parkinson's disease || ||	TRUE	igd	0.006	Short_sleep_duration	TRUE	2.38306e-07	inferred	VGa1SG	textfile	2	1	TRUE	NA	NA	NA	NA	NA	NA	NA
Short_sleep_duration	14	rs2863957	C	A	C	A	0.054	0.0211	0.782	0.7819	FALSE	FALSE	FALSE	ieu-b-7	2	114089551	0.0291	466555	0.4697	Parkinson's disease || id:ieu-b-7	Parkinson's disease	Parkinson's disease || ||	TRUE	igd	0.007	Short_sleep_duration	TRUE	1.21662e-14	inferred	VGa1SG	textfile	2	1	TRUE	NA	NA	NA	NA	NA	NA	NA
Short_sleep_duration	15	rs3776864	A	C	A	C	0.031	0.0646	0.667	0.7064	FALSE	FALSE	FALSE	ieu-b-7	5	102345546	0.0185	482730	0.000464804	Parkinson's disease || id:ieu-b-7	Parkinson's disease	Parkinson's disease || ||	TRUE	igd	0.006	Short_sleep_duration	TRUE	2.38306e-07	inferred	VGa1SG	textfile	2	1	TRUE	TRUE	rs3776864	rs2230457	C	A	C	A
Short_sleep_duration	16	rs4585442	G	A	G	A	0.031	0.0177	0.311	0.3107	FALSE	FALSE	FALSE	ieu-b-7	5	135511567	0.0242	468692	0.4647	Parkinson's disease || id:ieu-b-7	Parkinson's disease	Parkinson's disease || ||	TRUE	igd	0.006	Short_sleep_duration	TRUE	2.38306e-07	inferred	VGa1SG	textfile	2	1	TRUE	TRUE	rs4585442	rs67877005	G	A	A	G
Short_sleep_duration	17	rs5757675	G	T	G	T	0.034	0.0337	0.26	0.2841	FALSE	FALSE	FALSE	ieu-b-7	22	39839293	0.0247	468692	0.1714	Parkinson's disease || id:ieu-b-7	Parkinson's disease	Parkinson's disease || ||	TRUE	igd	0.007	Short_sleep_duration	TRUE	1.19092e-06	inferred	VGa1SG	textfile	2	1	TRUE	TRUE	rs5757675	rs6001595	G	T	C	T
Short_sleep_duration	18	rs59779556	T	G	T	G	0.025	-0.0106	0.554	0.5493	FALSE	FALSE	FALSE	ieu-b-7	16	56227965	0.0223	468692	0.636099	Parkinson's disease || id:ieu-b-7	Parkinson's disease	Parkinson's disease || ||	TRUE	igd	0.006	Short_sleep_duration	TRUE	3.09086e-05	inferred	VGa1SG	textfile	2	1	TRUE	NA	NA	NA	NA	NA	NA	NA
Short_sleep_duration	19	rs60882754	A	T	A	T	0.055	0.0238	0.939	0.9401	FALSE	TRUE	FALSE	ieu-b-7	8	52886619	0.0474	468692	0.616	Parkinson's disease || id:ieu-b-7	Parkinson's disease	Parkinson's disease || ||	TRUE	igd	0.012	Short_sleep_duration	TRUE	4.57622e-06	inferred	VGa1SG	textfile	2	1	TRUE	NA	NA	NA	NA	NA	NA	NA
Short_sleep_duration	20	rs7524118	C	T	C	T	0.03	0.0082	0.708	0.7053	FALSE	FALSE	FALSE	ieu-b-7	1	34736052	0.0244	468692	0.737099	Parkinson's disease || id:ieu-b-7	Parkinson's disease	Parkinson's disease || ||	TRUE	igd	0.006	Short_sleep_duration	TRUE	5.73303e-07	inferred	VGa1SG	textfile	2	1	TRUE	NA	NA	NA	NA	NA	NA	NA
Short_sleep_duration	21	rs9321171	C	T	C	T	0.031	0.0049	0.54	0.5357	FALSE	FALSE	FALSE	ieu-b-7	6	129848635	0.0173	482730	0.7779	Parkinson's disease || id:ieu-b-7	Parkinson's disease	Parkinson's disease || ||	TRUE	igd	0.006	Short_sleep_duration	TRUE	2.38306e-07	inferred	VGa1SG	textfile	2	1	TRUE	NA	NA	NA	NA	NA	NA	NA
Sleep duration || id:ukb-b-4424	1	rs10510128	A	G	A	G	0.0114031	0.0007	0.207951	0.2316	FALSE	FALSE	FALSE	ieu-b-7	10	125060948	0.0271	468692	0.9788	Parkinson's disease || id:ieu-b-7	Parkinson's disease	Parkinson's disease || ||	TRUE	igd	0.00197431	Sleep duration || id:ukb-b-4424	TRUE	7.69999e-09	reported	ukb-b-4424	igd	2	1	TRUE	NA	NA	NA	NA	NA	NA	NA	7.24991e-05	33.359
Sleep duration || id:ukb-b-4424	2	rs11039216	T	C	T	C	-0.0102766	-0.0436	0.532944	0.5385	FALSE	FALSE	FALSE	ieu-b-7	11	47406592	0.0173	482730	0.0116899	Parkinson's disease || id:ieu-b-7	Parkinson's disease	Parkinson's disease || ||	TRUE	igd	0.00160373	Sleep duration || id:ukb-b-4424	TRUE	1.5e-10	reported	ukb-b-4424	igd	2	1	TRUE	NA	NA	NA	NA	NA	NA	NA	8.92373e-05	41.0615
Sleep duration || id:ukb-b-4424	3	rs113021516	C	G	C	G	0.0114805	-0.022	0.335898	0.3241	FALSE	TRUE	FALSE	ieu-b-7	3	135874294	0.0196	482730	0.2614	Parkinson's disease || id:ieu-b-7	Parkinson's disease	Parkinson's disease || ||	TRUE	igd	0.00169722	Sleep duration || id:ukb-b-4424	TRUE	1.29987e-11	reported	ukb-b-4424	igd	2	1	TRUE	NA	NA	NA	NA	NA	NA	NA	9.94376e-05	45.7555
Sleep duration || id:ukb-b-4424	4	rs113113059	C	T	C	T	-0.0111278	-0.0293	0.219834	0.2116	FALSE	FALSE	FALSE	ieu-b-7	6	43160375	0.0211	482730	0.1652	Parkinson's disease || id:ieu-b-7	Parkinson's disease	Parkinson's disease || ||	TRUE	igd	0.00193332	Sleep duration || id:ukb-b-4424	TRUE	8.60003e-09	reported	ukb-b-4424	igd	2	1	TRUE	NA	NA	NA	NA	NA	NA	NA	7.19994e-05	33.1291
Sleep duration || id:ukb-b-4424	5	rs11621908	T	C	T	C	-0.019985	0.0339	0.082807	0.0892	FALSE	FALSE	FALSE	ieu-b-7	14	78495761	0.0403	468692	0.3995	Parkinson's disease || id:ieu-b-7	Parkinson's disease	Parkinson's disease || ||	TRUE	igd	0.00294327	Sleep duration || id:ukb-b-4424	TRUE	1.10002e-11	reported	ukb-b-4424	igd	2	1	TRUE	NA	NA	NA	NA	NA	NA	NA	0.000100197	46.1048
Sleep duration || id:ukb-b-4424	6	rs11643715	G	C	G	C	0.0109493	-0.0057	0.292625	0.3043	FALSE	TRUE	FALSE	ieu-b-7	16	23909538	0.0194	482730	0.7692	Parkinson's disease || id:ieu-b-7	Parkinson's disease	Parkinson's disease || ||	TRUE	igd	0.00176035	Sleep duration || id:ukb-b-4424	TRUE	5e-10	reported	ukb-b-4424	igd	2	1	TRUE	NA	NA	NA	NA	NA	NA	NA	8.40789e-05	38.6877
Sleep duration || id:ukb-b-4424	7	rs11650677	A	G	A	G	0.0111701	-0.0215	0.339185	0.3438	FALSE	FALSE	FALSE	ieu-b-7	17	11231513	0.0235	468692	0.3616	Parkinson's disease || id:ieu-b-7	Parkinson's disease	Parkinson's disease || ||	TRUE	igd	0.00168963	Sleep duration || id:ukb-b-4424	TRUE	3.80014e-11	reported	ukb-b-4424	igd	2	1	TRUE	NA	NA	NA	NA	NA	NA	NA	9.49814e-05	43.7048
Sleep duration || id:ukb-b-4424	8	rs11982852	T	C	T	C	-0.0117257	0.0267	0.243858	0.2342	FALSE	FALSE	FALSE	ieu-b-7	7	132568255	0.0263	468692	0.3106	Parkinson's disease || id:ieu-b-7	Parkinson's disease	Parkinson's disease || ||	TRUE	igd	0.00186248	Sleep duration || id:ukb-b-4424	TRUE	3.09999e-10	reported	ukb-b-4424	igd	2	1	TRUE	NA	NA	NA	NA	NA	NA	NA	8.61401e-05	39.6362
Sleep duration || id:ukb-b-4424	9	rs12518468	C	T	C	T	-0.0106435	-0.0123	0.328685	0.3365	FALSE	FALSE	FALSE	ieu-b-7	5	7249696	0.0235	468692	0.6008	Parkinson's disease || id:ieu-b-7	Parkinson's disease	Parkinson's disease || ||	TRUE	igd	0.00170288	Sleep duration || id:ukb-b-4424	TRUE	4.09996e-10	reported	ukb-b-4424	igd	2	1	TRUE	NA	NA	NA	NA	NA	NA	NA	8.4901e-05	39.066
Sleep duration || id:ukb-b-4424	10	rs12567114	A	G	A	G	0.0123378	-0.0037	0.276368	0.2808	FALSE	FALSE	FALSE	ieu-b-7	1	98527951	0.0251	468692	0.8829	Parkinson's disease || id:ieu-b-7	Parkinson's disease	Parkinson's disease || ||	TRUE	igd	0.00179427	Sleep duration || id:ukb-b-4424	TRUE	6.09958e-12	reported	ukb-b-4424	igd	2	1	TRUE	NA	NA	NA	NA	NA	NA	NA	0.000102755	47.2822
Sleep duration || id:ukb-b-4424	11	rs13107325	T	C	T	C	-0.0242704	-0.0311	0.074905	0.0751	FALSE	FALSE	FALSE	ieu-b-7	4	103188709	0.032	482730	0.3311	Parkinson's disease || id:ieu-b-7	Parkinson's disease	Parkinson's disease || ||	TRUE	igd	0.00303933	Sleep duration || id:ukb-b-4424	TRUE	1.39991e-15	reported	ukb-b-4424	igd	2	1	TRUE	NA	NA	NA	NA	NA	NA	NA	0.000138576	63.767
Sleep duration || id:ukb-b-4424	12	rs1348047	T	G	T	G	-0.012642	0.0374	0.267253	0.2723	FALSE	FALSE	FALSE	ieu-b-7	18	53050058	0.0214	482730	0.0804693	Parkinson's disease || id:ieu-b-7	Parkinson's disease	Parkinson's disease || ||	TRUE	igd	0.00182049	Sleep duration || id:ukb-b-4424	TRUE	3.80014e-12	reported	ukb-b-4424	igd	2	1	TRUE	NA	NA	NA	NA	NA	NA	NA	0.000104799	48.2229
Sleep duration || id:ukb-b-4424	13	rs1463053	A	G	A	G	0.0092696	-0.0251	0.639694	0.5962	FALSE	FALSE	FALSE	ieu-b-7	1	8705037	0.0189	482730	0.1853	Parkinson's disease || id:ieu-b-7	Parkinson's disease	Parkinson's disease || ||	TRUE	igd	0.00166133	Sleep duration || id:ukb-b-4424	TRUE	2.39999e-08	reported	ukb-b-4424	igd	2	1	TRUE	NA	NA	NA	NA	NA	NA	NA	6.76596e-05	31.1321
Sleep duration || id:ukb-b-4424	14	rs151014368	A	G	A	G	0.0113794	-0.0104	0.20734	0.2182	FALSE	FALSE	FALSE	ieu-b-7	5	176751059	0.0222	482730	0.64	Parkinson's disease || id:ieu-b-7	Parkinson's disease	Parkinson's disease || ||	TRUE	igd	0.00198822	Sleep duration || id:ukb-b-4424	TRUE	1e-08	reported	ukb-b-4424	igd	2	1	TRUE	NA	NA	NA	NA	NA	NA	NA	7.11914e-05	32.7573
Sleep duration || id:ukb-b-4424	15	rs1517572	C	A	C	A	0.0116589	-0.016	0.581256	0.5844	FALSE	FALSE	FALSE	ieu-b-7	11	28829882	0.0203	482730	0.4314	Parkinson's disease || id:ieu-b-7	Parkinson's disease	Parkinson's disease || ||	TRUE	igd	0.00162182	Sleep duration || id:ukb-b-4424	TRUE	6.4998e-13	reported	ukb-b-4424	igd	2	1	TRUE	NA	NA	NA	NA	NA	NA	NA	0.000112308	51.6783
Sleep duration || id:ukb-b-4424	16	rs1553132	G	A	G	A	0.0105257	0.0026	0.258638	0.2585	FALSE	FALSE	FALSE	ieu-b-7	11	88297740	0.0252	469691	0.9188	Parkinson's disease || id:ieu-b-7	Parkinson's disease	Parkinson's disease || ||	TRUE	igd	0.0018253	Sleep duration || id:ukb-b-4424	TRUE	8.10009e-09	reported	ukb-b-4424	igd	2	1	TRUE	NA	NA	NA	NA	NA	NA	NA	7.22688e-05	33.2531
Sleep duration || id:ukb-b-4424	17	rs17391944	G	T	G	T	0.0218515	-0.101	0.04986	0.0503	FALSE	FALSE	FALSE	ieu-b-7	9	36901494	0.052	468692	0.0519697	Parkinson's disease || id:ieu-b-7	Parkinson's disease	Parkinson's disease || ||	TRUE	igd	0.00372396	Sleep duration || id:ukb-b-4424	TRUE	4.39997e-09	reported	ukb-b-4424	igd	2	1	TRUE	NA	NA	NA	NA	NA	NA	NA	7.48288e-05	34.4311
Sleep duration || id:ukb-b-4424	18	rs174564	G	A	G	A	0.00974534	0.0046	0.348602	0.3343	FALSE	FALSE	FALSE	ieu-b-7	11	61588305	0.0178	482730	0.7973	Parkinson's disease || id:ieu-b-7	Parkinson's disease	Parkinson's disease || ||	TRUE	igd	0.001678	Sleep duration || id:ukb-b-4424	TRUE	6.29999e-09	reported	ukb-b-4424	igd	2	1	TRUE	NA	NA	NA	NA	NA	NA	NA	7.33039e-05	33.7294
Sleep duration || id:ukb-b-4424	19	rs1972712	C	T	C	T	0.011796	-0.0166	0.249455	0.261	FALSE	FALSE	FALSE	ieu-b-7	2	166945635	0.0207	482730	0.4221	Parkinson's disease || id:ieu-b-7	Parkinson's disease	Parkinson's disease || ||	TRUE	igd	0.00184758	Sleep duration || id:ukb-b-4424	TRUE	1.7e-10	reported	ukb-b-4424	igd	2	1	TRUE	NA	NA	NA	NA	NA	NA	NA	8.85877e-05	40.7625
Sleep duration || id:ukb-b-4424	20	rs2079070	G	C	G	C	-0.0134358	0.0181	0.734582	0.7249	FALSE	TRUE	FALSE	ieu-b-7	7	114126432	0.0249	471013	0.4667	Parkinson's disease || id:ieu-b-7	Parkinson's disease	Parkinson's disease || ||	TRUE	igd	0.00181083	Sleep duration || id:ukb-b-4424	TRUE	1.20005e-13	reported	ukb-b-4424	igd	2	1	TRUE	NA	NA	NA	NA	NA	NA	NA	0.000119638	55.0516
Sleep duration || id:ukb-b-4424	21	rs2192528	G	A	G	A	-0.00980706	-0.0165	0.522493	0.5257	FALSE	FALSE	FALSE	ieu-b-7	4	18327896	0.0224	468692	0.4616	Parkinson's disease || id:ieu-b-7	Parkinson's disease	Parkinson's disease || ||	TRUE	igd	0.00160143	Sleep duration || id:ukb-b-4424	TRUE	9.09997e-10	reported	ukb-b-4424	igd	2	1	TRUE	NA	NA	NA	NA	NA	NA	NA	8.15033e-05	37.5025
Sleep duration || id:ukb-b-4424	22	rs2236295	T	G	T	G	-0.00907587	-0.0053	0.403043	0.3867	FALSE	FALSE	FALSE	ieu-b-7	10	64564892	0.0177	482730	0.7668	Parkinson's disease || id:ieu-b-7	Parkinson's disease	Parkinson's disease || ||	TRUE	igd	0.00163637	Sleep duration || id:ukb-b-4424	TRUE	2.90001e-08	reported	ukb-b-4424	igd	2	1	TRUE	NA	NA	NA	NA	NA	NA	NA	6.68549e-05	30.7618
Sleep duration || id:ukb-b-4424	23	rs2279681	G	C	G	C	0.00929853	0.0216	0.341785	0.36	FALSE	TRUE	FALSE	ieu-b-7	1	201861016	0.0176	482730	0.219	Parkinson's disease || id:ieu-b-7	Parkinson's disease	Parkinson's disease || ||	TRUE	igd	0.00168475	Sleep duration || id:ukb-b-4424	TRUE	3.40001e-08	reported	ukb-b-4424	igd	2	1	TRUE	NA	NA	NA	NA	NA	NA	NA	6.6203e-05	30.4618
Sleep duration || id:ukb-b-4424	24	rs2683630	G	C	G	C	0.0149506	0.0103	0.629076	0.6298	FALSE	TRUE	FALSE	ieu-b-7	2	58058069	0.0182	482730	0.573099	Parkinson's disease || id:ieu-b-7	Parkinson's disease	Parkinson's disease || ||	TRUE	igd	0.0016555	Sleep duration || id:ukb-b-4424	TRUE	1.69981e-19	reported	ukb-b-4424	igd	2	1	TRUE	NA	NA	NA	NA	NA	NA	NA	0.000177227	81.5562
Sleep duration || id:ukb-b-4424	25	rs2734831	G	T	G	T	-0.00979722	-0.0451	0.606881	0.6162	FALSE	FALSE	FALSE	ieu-b-7	11	113293596	0.0174	482730	0.00966607	Parkinson's disease || id:ieu-b-7	Parkinson's disease	Parkinson's disease || ||	TRUE	igd	0.00163853	Sleep duration || id:ukb-b-4424	TRUE	2.19999e-09	reported	ukb-b-4424	igd	2	1	TRUE	NA	NA	NA	NA	NA	NA	NA	7.76984e-05	35.7516
Sleep duration || id:ukb-b-4424	26	rs2748809	C	T	C	T	-0.00925348	-0.0216	0.429258	0.4237	FALSE	FALSE	FALSE	ieu-b-7	14	99735233	0.0272	13655	0.4277	Parkinson's disease || id:ieu-b-7	Parkinson's disease	Parkinson's disease || ||	TRUE	igd	0.00164549	Sleep duration || id:ukb-b-4424	TRUE	1.89998e-08	reported	ukb-b-4424	igd	2	1	TRUE	NA	NA	NA	NA	NA	NA	NA	6.87288e-05	31.6241
Sleep duration || id:ukb-b-4424	27	rs2839753	C	T	C	T	-0.0106369	-0.0001	0.265347	0.2649	FALSE	FALSE	FALSE	ieu-b-7	4	82287250	0.0205	482730	0.9972	Parkinson's disease || id:ieu-b-7	Parkinson's disease	Parkinson's disease || ||	TRUE	igd	0.00181248	Sleep duration || id:ukb-b-4424	TRUE	4.39997e-09	reported	ukb-b-4424	igd	2	1	TRUE	NA	NA	NA	NA	NA	NA	NA	7.48514e-05	34.4415
Sleep duration || id:ukb-b-4424	28	rs2863957	A	C	A	C	0.0289035	-0.0211	0.220537	0.2181	FALSE	FALSE	FALSE	ieu-b-7	2	114089551	0.0291	466555	0.4697	Parkinson's disease || id:ieu-b-7	Parkinson's disease	Parkinson's disease || ||	TRUE	igd	0.00192922	Sleep duration || id:ukb-b-4424	TRUE	9.60064e-51	reported	ukb-b-4424	igd	2	1	TRUE	NA	NA	NA	NA	NA	NA	NA	0.000487612	224.458
Sleep duration || id:ukb-b-4424	29	rs34354917	A	C	A	C	-0.0100207	0.0026	0.288625	0.2901	FALSE	FALSE	FALSE	ieu-b-7	12	38764559	0.0224	482730	0.9078	Parkinson's disease || id:ieu-b-7	Parkinson's disease	Parkinson's disease || ||	TRUE	igd	0.00176809	Sleep duration || id:ukb-b-4424	TRUE	1.40001e-08	reported	ukb-b-4424	igd	2	1	TRUE	NA	NA	NA	NA	NA	NA	NA	6.98081e-05	32.1207
Sleep duration || id:ukb-b-4424	30	rs34556183	G	A	G	A	-0.0133534	-0.0149	0.279888	0.2694	FALSE	FALSE	FALSE	ieu-b-7	6	28636643	0.021	480593	0.4773	Parkinson's disease || id:ieu-b-7	Parkinson's disease	Parkinson's disease || ||	TRUE	igd	0.00178155	Sleep duration || id:ukb-b-4424	TRUE	6.59933e-14	reported	ukb-b-4424	igd	2	1	TRUE	TRUE	rs34556183	rs61229539	G	A	C	T	0.000122091	56.1805
Sleep duration || id:ukb-b-4424	31	rs34786000	T	G	T	G	0.0109576	0.0459	0.553361	0.5422	FALSE	FALSE	FALSE	ieu-b-7	19	9942123	0.0175	482730	0.00868001	Parkinson's disease || id:ieu-b-7	Parkinson's disease	Parkinson's disease || ||	TRUE	igd	0.00162787	Sleep duration || id:ukb-b-4424	TRUE	1.69981e-11	reported	ukb-b-4424	igd	2	1	TRUE	NA	NA	NA	NA	NA	NA	NA	9.84685e-05	45.3095
Sleep duration || id:ukb-b-4424	32	rs35126035	C	A	C	A	-0.00919552	-0.02	0.55833	0.555	FALSE	FALSE	FALSE	ieu-b-7	19	34986767	0.0261	15448	0.4431	Parkinson's disease || id:ieu-b-7	Parkinson's disease	Parkinson's disease || ||	TRUE	igd	0.00164378	Sleep duration || id:ukb-b-4424	TRUE	2.19999e-08	reported	ukb-b-4424	igd	2	1	TRUE	NA	NA	NA	NA	NA	NA	NA	6.80118e-05	31.2942
Sleep duration || id:ukb-b-4424	33	rs35662245	A	T	A	T	0.0101569	-0.0172	0.338713	0.3422	FALSE	TRUE	FALSE	ieu-b-7	2	147583187	0.0189	482730	0.3637	Parkinson's disease || id:ieu-b-7	Parkinson's disease	Parkinson's disease || ||	TRUE	igd	0.00169075	Sleep duration || id:ukb-b-4424	TRUE	1.89998e-09	reported	ukb-b-4424	igd	2	1	TRUE	NA	NA	NA	NA	NA	NA	NA	7.84293e-05	36.0879
Sleep duration || id:ukb-b-4424	34	rs365663	G	A	G	A	-0.00928337	-0.0242	0.45495	0.4529	FALSE	FALSE	FALSE	ieu-b-7	5	1428883	0.0223	468692	0.2785	Parkinson's disease || id:ieu-b-7	Parkinson's disease	Parkinson's disease || ||	TRUE	igd	0.00161004	Sleep duration || id:ukb-b-4424	TRUE	8.10009e-09	reported	ukb-b-4424	igd	2	1	TRUE	NA	NA	NA	NA	NA	NA	NA	7.22529e-05	33.2457
Sleep duration || id:ukb-b-4424	35	rs374153	T	C	T	C	-0.0130999	-0.0184	0.842567	0.8463	FALSE	FALSE	FALSE	ieu-b-7	2	40382712	0.0311	468692	0.552699	Parkinson's disease || id:ieu-b-7	Parkinson's disease	Parkinson's disease || ||	TRUE	igd	0.00219716	Sleep duration || id:ukb-b-4424	TRUE	2.5e-09	reported	ukb-b-4424	igd	2	1	TRUE	NA	NA	NA	NA	NA	NA	NA	7.72552e-05	35.5476
Sleep duration || id:ukb-b-4424	36	rs4767550	G	A	G	A	0.0108732	-0.0051	0.413171	0.4144	FALSE	FALSE	FALSE	ieu-b-7	12	117951150	0.0228	468692	0.8225	Parkinson's disease || id:ieu-b-7	Parkinson's disease	Parkinson's disease || ||	TRUE	igd	0.00163264	Sleep duration || id:ukb-b-4424	TRUE	2.70023e-11	reported	ukb-b-4424	igd	2	1	TRUE	NA	NA	NA	NA	NA	NA	NA	9.63919e-05	44.3539
Sleep duration || id:ukb-b-4424	37	rs55658675	T	C	T	C	-0.00969462	-0.02	0.352906	0.3387	FALSE	FALSE	FALSE	ieu-b-7	14	65554638	0.0201	482730	0.3193	Parkinson's disease || id:ieu-b-7	Parkinson's disease	Parkinson's disease || ||	TRUE	igd	0.00167463	Sleep duration || id:ukb-b-4424	TRUE	7.10003e-09	reported	ukb-b-4424	igd	2	1	TRUE	NA	NA	NA	NA	NA	NA	NA	7.28351e-05	33.5137
Sleep duration || id:ukb-b-4424	38	rs56367859	G	A	G	A	0.0116218	-0.0232	0.397585	0.4054	FALSE	FALSE	FALSE	ieu-b-7	16	6540795	0.0202	482730	0.2518	Parkinson's disease || id:ieu-b-7	Parkinson's disease	Parkinson's disease || ||	TRUE	igd	0.00163585	Sleep duration || id:ukb-b-4424	TRUE	1.20005e-12	reported	ukb-b-4424	igd	2	1	TRUE	NA	NA	NA	NA	NA	NA	NA	0.000109688	50.4729
Sleep duration || id:ukb-b-4424	39	rs62444917	C	A	C	A	0.0129633	-0.0024	0.222315	0.2385	FALSE	FALSE	FALSE	ieu-b-7	7	2108036	0.0235	482730	0.92	Parkinson's disease || id:ieu-b-7	Parkinson's disease	Parkinson's disease || ||	TRUE	igd	0.00192625	Sleep duration || id:ukb-b-4424	TRUE	1.69981e-11	reported	ukb-b-4424	igd	2	1	TRUE	TRUE	rs62444917	rs17132130	C	A	C	G	9.84264e-05	45.2902
Sleep duration || id:ukb-b-4424	40	rs6561715	A	T	A	T	0.00978234	-0.0056	0.630636	0.633	FALSE	TRUE	FALSE	ieu-b-7	13	53888526	0.0198	482730	0.7756	Parkinson's disease || id:ieu-b-7	Parkinson's disease	Parkinson's disease || ||	TRUE	igd	0.001661	Sleep duration || id:ukb-b-4424	TRUE	3.89996e-09	reported	ukb-b-4424	igd	2	1	TRUE	NA	NA	NA	NA	NA	NA	NA	7.53811e-05	34.6852
Sleep duration || id:ukb-b-4424	41	rs6681755	A	G	A	G	0.0115272	-0.0354	0.199783	0.1943	FALSE	FALSE	FALSE	ieu-b-7	1	71703970	0.0237	482730	0.1353	Parkinson's disease || id:ieu-b-7	Parkinson's disease	Parkinson's disease || ||	TRUE	igd	0.00200498	Sleep duration || id:ukb-b-4424	TRUE	8.99995e-09	reported	ukb-b-4424	igd	2	1	TRUE	NA	NA	NA	NA	NA	NA	NA	7.18365e-05	33.0541
Sleep duration || id:ukb-b-4424	42	rs6783516	T	G	T	G	-0.00983781	0.011	0.583817	0.5822	FALSE	FALSE	FALSE	ieu-b-7	3	178540353	0.0226	468692	0.6259	Parkinson's disease || id:ieu-b-7	Parkinson's disease	Parkinson's disease || ||	TRUE	igd	0.00163116	Sleep duration || id:ukb-b-4424	TRUE	1.6e-09	reported	ukb-b-4424	igd	2	1	TRUE	TRUE	rs6783516	rs10804873	G	T	G	T	7.9053e-05	36.3749
Sleep duration || id:ukb-b-4424	43	rs6889592	A	G	A	G	0.0117662	-0.0523	0.332608	0.3205	FALSE	FALSE	FALSE	ieu-b-7	5	102313939	0.0179	482730	0.00354103	Parkinson's disease || id:ieu-b-7	Parkinson's disease	Parkinson's disease || ||	TRUE	igd	0.00169707	Sleep duration || id:ukb-b-4424	TRUE	4.10015e-12	reported	ukb-b-4424	igd	2	1	TRUE	NA	NA	NA	NA	NA	NA	NA	0.000104466	48.0697
Sleep duration || id:ukb-b-4424	44	rs7016314	C	T	C	T	0.0100011	-0.0143	0.655927	0.6597	FALSE	FALSE	FALSE	ieu-b-7	8	14043662	0.0235	468692	0.5438	Parkinson's disease || id:ieu-b-7	Parkinson's disease	Parkinson's disease || ||	TRUE	igd	0.00168824	Sleep duration || id:ukb-b-4424	TRUE	3.09999e-09	reported	ukb-b-4424	igd	2	1	TRUE	NA	NA	NA	NA	NA	NA	NA	7.62681e-05	35.0934
Sleep duration || id:ukb-b-4424	45	rs7115856	C	A	C	A	0.010819	0.0215	0.461273	0.4567	FALSE	FALSE	FALSE	ieu-b-7	11	43769287	0.0223	468692	0.3367	Parkinson's disease || id:ieu-b-7	Parkinson's disease	Parkinson's disease || ||	TRUE	igd	0.00160279	Sleep duration || id:ukb-b-4424	TRUE	1.50003e-11	reported	ukb-b-4424	igd	2	1	TRUE	NA	NA	NA	NA	NA	NA	NA	9.90209e-05	45.5637
Sleep duration || id:ukb-b-4424	46	rs72771082	G	A	G	A	0.0109737	0.0774	0.217832	0.2296	FALSE	FALSE	FALSE	ieu-b-7	16	20023601	0.0266	468692	0.00365502	Parkinson's disease || id:ieu-b-7	Parkinson's disease	Parkinson's disease || ||	TRUE	igd	0.00193583	Sleep duration || id:ukb-b-4424	TRUE	1.40001e-08	reported	ukb-b-4424	igd	2	1	TRUE	NA	NA	NA	NA	NA	NA	NA	6.98377e-05	32.1344
Sleep duration || id:ukb-b-4424	47	rs72831782	A	T	A	T	-0.0101806	-0.0223	0.269409	0.2637	FALSE	TRUE	FALSE	ieu-b-7	2	103944744	0.0315	13655	0.4795	Parkinson's disease || id:ieu-b-7	Parkinson's disease	Parkinson's disease || ||	TRUE	igd	0.00184372	Sleep duration || id:ukb-b-4424	TRUE	3.40001e-08	reported	ukb-b-4424	igd	2	1	TRUE	NA	NA	NA	NA	NA	NA	NA	6.62639e-05	30.4898
Sleep duration || id:ukb-b-4424	48	rs7517981	C	T	C	T	-0.0099657	-0.0069	0.601498	0.5784	FALSE	FALSE	FALSE	ieu-b-7	1	31567131	0.0233	468692	0.766399	Parkinson's disease || id:ieu-b-7	Parkinson's disease	Parkinson's disease || ||	TRUE	igd	0.00163399	Sleep duration || id:ukb-b-4424	TRUE	1.09999e-09	reported	ukb-b-4424	igd	2	1	TRUE	TRUE	rs7517981	rs4949192	T	C	C	T	8.08408e-05	37.1976
Sleep duration || id:ukb-b-4424	49	rs75539574	C	A	C	A	0.0236649	-0.0041	0.085774	0.0855	FALSE	FALSE	FALSE	ieu-b-7	2	58871658	0.0401	468692	0.9187	Parkinson's disease || id:ieu-b-7	Parkinson's disease	Parkinson's disease || ||	TRUE	igd	0.00287424	Sleep duration || id:ukb-b-4424	TRUE	1.80011e-16	reported	ukb-b-4424	igd	2	1	TRUE	NA	NA	NA	NA	NA	NA	NA	0.000147315	67.7893
Sleep duration || id:ukb-b-4424	50	rs76258078	G	A	G	A	-0.0216874	-0.0426	0.049994	0.0447	FALSE	FALSE	FALSE	ieu-b-7	3	55823890	0.057	468692	0.4553	Parkinson's disease || id:ieu-b-7	Parkinson's disease	Parkinson's disease || ||	TRUE	igd	0.00368137	Sleep duration || id:ukb-b-4424	TRUE	3.79997e-09	reported	ukb-b-4424	igd	2	1	TRUE	NA	NA	NA	NA	NA	NA	NA	7.54244e-05	34.7052
Sleep duration || id:ukb-b-4424	51	rs7644809	C	T	C	T	-0.0101517	0.0055	0.576033	0.5751	FALSE	FALSE	FALSE	ieu-b-7	3	107564459	0.0226	468692	0.8077	Parkinson's disease || id:ieu-b-7	Parkinson's disease	Parkinson's disease || ||	TRUE	igd	0.00162466	Sleep duration || id:ukb-b-4424	TRUE	4.09996e-10	reported	ukb-b-4424	igd	2	1	TRUE	NA	NA	NA	NA	NA	NA	NA	8.48525e-05	39.0437
Sleep duration || id:ukb-b-4424	52	rs7711696	T	G	T	G	-0.00986657	0.0158	0.304987	0.3106	FALSE	FALSE	FALSE	ieu-b-7	5	135486536	0.0242	468692	0.5144	Parkinson's disease || id:ieu-b-7	Parkinson's disease	Parkinson's disease || ||	TRUE	igd	0.00173522	Sleep duration || id:ukb-b-4424	TRUE	1.29999e-08	reported	ukb-b-4424	igd	2	1	TRUE	NA	NA	NA	NA	NA	NA	NA	7.02654e-05	32.3312
Sleep duration || id:ukb-b-4424	53	rs7740402	G	T	G	T	-0.00951481	0.0035	0.3061	0.3129	FALSE	FALSE	FALSE	ieu-b-7	6	130638156	0.0186	482730	0.8506	Parkinson's disease || id:ieu-b-7	Parkinson's disease	Parkinson's disease || ||	TRUE	igd	0.00173455	Sleep duration || id:ukb-b-4424	TRUE	4.09996e-08	reported	ukb-b-4424	igd	2	1	TRUE	NA	NA	NA	NA	NA	NA	NA	6.53954e-05	30.0902
Sleep duration || id:ukb-b-4424	54	rs7831557	A	G	A	G	-0.0105656	0.0241	0.517438	0.5073	FALSE	FALSE	FALSE	ieu-b-7	8	10280228	0.0233	482730	0.3013	Parkinson's disease || id:ieu-b-7	Parkinson's disease	Parkinson's disease || ||	TRUE	igd	0.00160135	Sleep duration || id:ukb-b-4424	TRUE	4.19952e-11	reported	ukb-b-4424	igd	2	1	TRUE	NA	NA	NA	NA	NA	NA	NA	9.4607e-05	43.5325
Sleep duration || id:ukb-b-4424	55	rs8038326	G	A	G	A	-0.0133838	0.0182	0.273169	0.2789	FALSE	FALSE	FALSE	ieu-b-7	15	47989799	0.0197	482730	0.3553	Parkinson's disease || id:ieu-b-7	Parkinson's disease	Parkinson's disease || ||	TRUE	igd	0.00179311	Sleep duration || id:ukb-b-4424	TRUE	8.4004e-14	reported	ukb-b-4424	igd	2	1	TRUE	NA	NA	NA	NA	NA	NA	NA	0.000121071	55.7113
Sleep duration || id:ukb-b-4424	56	rs8047587	T	G	T	G	-0.0110198	-0.0006	0.439514	0.4492	FALSE	FALSE	FALSE	ieu-b-7	16	53798622	0.0172	482730	0.9711	Parkinson's disease || id:ieu-b-7	Parkinson's disease	Parkinson's disease || ||	TRUE	igd	0.00161283	Sleep duration || id:ukb-b-4424	TRUE	8.30042e-12	reported	ukb-b-4424	igd	2	1	TRUE	NA	NA	NA	NA	NA	NA	NA	0.000101455	46.684
Sleep duration || id:ukb-b-4424	57	rs8072993	G	T	G	T	0.0109222	0.0044	0.635677	0.6252	FALSE	FALSE	FALSE	ieu-b-7	17	21335627	0.0399	11518	0.9127	Parkinson's disease || id:ieu-b-7	Parkinson's disease	Parkinson's disease || ||	TRUE	igd	0.00199248	Sleep duration || id:ukb-b-4424	TRUE	4.20001e-08	reported	ukb-b-4424	igd	2	1	TRUE	NA	NA	NA	NA	NA	NA	NA	6.53059e-05	30.049
Sleep duration || id:ukb-b-4424	58	rs8072993	G	T	G	T	0.0109222	0.0044	0.635677	0.6252	FALSE	FALSE	FALSE	ieu-b-7	17	21335627	0.0399	11518	0.9127	Parkinson's disease || id:ieu-b-7	Parkinson's disease	Parkinson's disease || ||	TRUE	igd	0.00199248	Sleep duration || id:ukb-b-4424	TRUE	4.20001e-08	reported	ukb-b-4424	igd	2	2	TRUE	NA	NA	NA	NA	NA	NA	NA	6.53059e-05	30.049
Sleep duration || id:ukb-b-4424	59	rs915416	G	C	G	C	-0.0127275	0.0051	0.70906	0.7064	FALSE	TRUE	FALSE	ieu-b-7	1	34735252	0.0245	468692	0.8362	Parkinson's disease || id:ieu-b-7	Parkinson's disease	Parkinson's disease || ||	TRUE	igd	0.00176031	Sleep duration || id:ukb-b-4424	TRUE	4.79954e-13	reported	ukb-b-4424	igd	2	1	TRUE	TRUE	rs915416	rs10914895	C	G	C	A	0.000113608	52.2764
Sleep duration || id:ukb-b-4424	60	rs9302680	A	G	A	G	0.0120438	0.0129	0.439272	0.4436	FALSE	FALSE	FALSE	ieu-b-7	16	56269892	0.0223	468692	0.5624	Parkinson's disease || id:ieu-b-7	Parkinson's disease	Parkinson's disease || ||	TRUE	igd	0.00161069	Sleep duration || id:ukb-b-4424	TRUE	7.59976e-14	reported	ukb-b-4424	igd	2	1	TRUE	NA	NA	NA	NA	NA	NA	NA	0.000121506	55.9115
Sleep duration || id:ukb-b-4424	61	rs9345234	C	A	C	A	0.0091922	-0.0188	0.57786	0.5171	FALSE	FALSE	FALSE	ieu-b-7	6	93162639	0.0205	482730	0.3611	Parkinson's disease || id:ieu-b-7	Parkinson's disease	Parkinson's disease || ||	TRUE	igd	0.00162351	Sleep duration || id:ukb-b-4424	TRUE	1.5e-08	reported	ukb-b-4424	igd	2	1	TRUE	NA	NA	NA	NA	NA	NA	NA	6.96703e-05	32.0573
Sleep duration || id:ukb-b-4424	62	rs9382445	C	T	C	T	-0.00948383	-0.0153	0.375168	0.3749	FALSE	FALSE	FALSE	ieu-b-7	6	54937974	0.0194	482730	0.4292	Parkinson's disease || id:ieu-b-7	Parkinson's disease	Parkinson's disease || ||	TRUE	igd	0.00164901	Sleep duration || id:ukb-b-4424	TRUE	8.9e-09	reported	ukb-b-4424	igd	2	1	TRUE	NA	NA	NA	NA	NA	NA	NA	7.1885e-05	33.0765
Sleep duration || id:ukb-b-4424	63	rs9611007	T	C	T	C	-0.0135938	-0.05	0.141673	0.145	FALSE	FALSE	FALSE	ieu-b-7	22	39077058	0.0256	482730	0.0508897	Parkinson's disease || id:ieu-b-7	Parkinson's disease	Parkinson's disease || ||	TRUE	igd	0.00229721	Sleep duration || id:ukb-b-4424	TRUE	3.29997e-09	reported	ukb-b-4424	igd	2	1	TRUE	NA	NA	NA	NA	NA	NA	NA	7.6102e-05	35.017
Sleep duration || id:ukb-b-4424	64	rs9810474	T	C	T	C	-0.0111549	0.0065	0.232184	0.2214	FALSE	FALSE	FALSE	ieu-b-7	3	74961196	0.0245	482730	0.7895	Parkinson's disease || id:ieu-b-7	Parkinson's disease	Parkinson's disease || ||	TRUE	igd	0.00189404	Sleep duration || id:ukb-b-4424	TRUE	3.89996e-09	reported	ukb-b-4424	igd	2	1	TRUE	NA	NA	NA	NA	NA	NA	NA	7.53822e-05	34.6858
Sleep duration || id:ukb-b-4424	65	rs9903898	T	C	T	C	-0.00944768	-0.0233	0.488883	0.4763	FALSE	FALSE	FALSE	ieu-b-7	17	45575354	0.0171	482730	0.1739	Parkinson's disease || id:ieu-b-7	Parkinson's disease	Parkinson's disease || ||	TRUE	igd	0.00160094	Sleep duration || id:ukb-b-4424	TRUE	3.59998e-09	reported	ukb-b-4424	igd	2	1	TRUE	NA	NA	NA	NA	NA	NA	NA	7.56861e-05	34.8256
Sleeplessness / insomnia || id:ukb-b-3957	1	rs10838708	A	G	A	G	-0.00947656	0.0301	0.45899	0.4618	FALSE	FALSE	FALSE	ieu-b-7	11	47441513	0.0174	482730	0.0840001	Parkinson's disease || id:ieu-b-7	Parkinson's disease	Parkinson's disease || ||	TRUE	igd	0.00150271	Sleeplessness / insomnia || id:ukb-b-3957	TRUE	2.90001e-10	reported	ukb-b-3957	igd	2	1	TRUE	NA	NA	NA	NA	NA	NA	NA	8.60105e-05	39.7694
Sleeplessness / insomnia || id:ukb-b-3957	2	rs11097861	G	A	G	A	0.0100437	0.0282	0.716256	0.7137	FALSE	FALSE	FALSE	ieu-b-7	4	105330133	0.0245	468692	0.2496	Parkinson's disease || id:ieu-b-7	Parkinson's disease	Parkinson's disease || ||	TRUE	igd	0.00164946	Sleeplessness / insomnia || id:ukb-b-3957	TRUE	1.09999e-09	reported	ukb-b-3957	igd	2	1	TRUE	NA	NA	NA	NA	NA	NA	NA	8.01875e-05	37.0768
Sleeplessness / insomnia || id:ukb-b-3957	3	rs11152363	A	G	A	G	0.0156393	0.0656	0.186319	0.1965	FALSE	FALSE	FALSE	ieu-b-7	18	53057188	0.0248	482730	0.00821997	Parkinson's disease || id:ieu-b-7	Parkinson's disease	Parkinson's disease || ||	TRUE	igd	0.00192518	Sleeplessness / insomnia || id:ukb-b-3957	TRUE	4.49987e-16	reported	ukb-b-3957	igd	2	1	TRUE	NA	NA	NA	NA	NA	NA	NA	0.000142714	65.9918
Sleeplessness / insomnia || id:ukb-b-3957	4	rs113851554	T	G	T	G	0.0467802	-0.0295	0.057291	0.0549	FALSE	FALSE	FALSE	ieu-b-7	2	66750564	0.0522	468692	0.5718	Parkinson's disease || id:ieu-b-7	Parkinson's disease	Parkinson's disease || ||	TRUE	igd	0.00331329	Sleeplessness / insomnia || id:ukb-b-3957	TRUE	2.90001e-45	reported	ukb-b-3957	igd	2	1	TRUE	NA	NA	NA	NA	NA	NA	NA	0.000430979	199.344
Sleeplessness / insomnia || id:ukb-b-3957	5	rs11635495	C	T	C	T	0.00937342	-0.0054	0.512179	0.5006	FALSE	FALSE	FALSE	ieu-b-7	15	67804682	0.0176	482730	0.7603	Parkinson's disease || id:ieu-b-7	Parkinson's disease	Parkinson's disease || ||	TRUE	igd	0.00148509	Sleeplessness / insomnia || id:ukb-b-3957	TRUE	2.80001e-10	reported	ukb-b-3957	igd	2	1	TRUE	NA	NA	NA	NA	NA	NA	NA	8.6157e-05	39.8372
Sleeplessness / insomnia || id:ukb-b-3957	6	rs11635495	C	T	C	T	0.00937342	-0.0054	0.512179	0.5006	FALSE	FALSE	FALSE	ieu-b-7	15	67804682	0.0176	482730	0.7603	Parkinson's disease || id:ieu-b-7	Parkinson's disease	Parkinson's disease || ||	TRUE	igd	0.00148509	Sleeplessness / insomnia || id:ukb-b-3957	TRUE	2.80001e-10	reported	ukb-b-3957	igd	2	2	TRUE	NA	NA	NA	NA	NA	NA	NA	8.6157e-05	39.8372
Sleeplessness / insomnia || id:ukb-b-3957	7	rs11790060	C	T	C	T	-0.0103391	0.0357	0.330834	0.3334	FALSE	FALSE	FALSE	ieu-b-7	9	96202932	0.0178	482730	0.04539	Parkinson's disease || id:ieu-b-7	Parkinson's disease	Parkinson's disease || ||	TRUE	igd	0.00157854	Sleeplessness / insomnia || id:ukb-b-3957	TRUE	5.79963e-11	reported	ukb-b-3957	igd	2	1	TRUE	NA	NA	NA	NA	NA	NA	NA	9.27794e-05	42.8995
Sleeplessness / insomnia || id:ukb-b-3957	8	rs12049261	C	G	C	G	0.0111868	-0.0292	0.292534	0.2881	FALSE	TRUE	FALSE	ieu-b-7	1	107190407	0.0248	468692	0.239	Parkinson's disease || id:ieu-b-7	Parkinson's disease	Parkinson's disease || ||	TRUE	igd	0.00163048	Sleeplessness / insomnia || id:ukb-b-3957	TRUE	6.79986e-12	reported	ukb-b-3957	igd	2	1	TRUE	NA	NA	NA	NA	NA	NA	NA	0.000101806	47.0738
Sleeplessness / insomnia || id:ukb-b-3957	9	rs12470989	G	A	G	A	-0.0102429	0.0352	0.203934	0.2294	FALSE	FALSE	FALSE	ieu-b-7	2	200955823	0.0227	482730	0.1202	Parkinson's disease || id:ieu-b-7	Parkinson's disease	Parkinson's disease || ||	TRUE	igd	0.00184485	Sleeplessness / insomnia || id:ukb-b-3957	TRUE	2.80001e-08	reported	ukb-b-3957	igd	2	1	TRUE	NA	NA	NA	NA	NA	NA	NA	6.66703e-05	30.8263
Sleeplessness / insomnia || id:ukb-b-3957	10	rs1430205	T	C	T	C	0.00947493	0.0245	0.461507	0.4763	FALSE	FALSE	FALSE	ieu-b-7	5	87678585	0.0222	468692	0.2699	Parkinson's disease || id:ieu-b-7	Parkinson's disease	Parkinson's disease || ||	TRUE	igd	0.00149107	Sleeplessness / insomnia || id:ukb-b-3957	TRUE	2.1e-10	reported	ukb-b-3957	igd	2	1	TRUE	NA	NA	NA	NA	NA	NA	NA	8.73284e-05	40.3789
Sleeplessness / insomnia || id:ukb-b-3957	11	rs1547630	A	G	A	G	0.00910814	0.043	0.651513	0.6464	FALSE	FALSE	FALSE	ieu-b-7	13	112642528	0.0235	468692	0.0676208	Parkinson's disease || id:ieu-b-7	Parkinson's disease	Parkinson's disease || ||	TRUE	igd	0.00156447	Sleeplessness / insomnia || id:ukb-b-3957	TRUE	5.80003e-09	reported	ukb-b-3957	igd	2	1	TRUE	NA	NA	NA	NA	NA	NA	NA	7.33045e-05	33.894
Sleeplessness / insomnia || id:ukb-b-3957	12	rs1592757	C	G	C	G	0.0102216	-0.0282	0.355788	0.3556	FALSE	TRUE	FALSE	ieu-b-7	5	103889998	0.0228	471013	0.2155	Parkinson's disease || id:ieu-b-7	Parkinson's disease	Parkinson's disease || ||	TRUE	igd	0.00154996	Sleeplessness / insomnia || id:ukb-b-3957	TRUE	4.30031e-11	reported	ukb-b-3957	igd	2	1	TRUE	NA	NA	NA	NA	NA	NA	NA	9.40575e-05	43.4906
Sleeplessness / insomnia || id:ukb-b-3957	13	rs17151854	T	G	T	G	0.0129893	0.0096	0.15241	0.1442	FALSE	FALSE	FALSE	ieu-b-7	8	10236559	0.0289	482730	0.7406	Parkinson's disease || id:ieu-b-7	Parkinson's disease	Parkinson's disease || ||	TRUE	igd	0.00207434	Sleeplessness / insomnia || id:ukb-b-3957	TRUE	3.79997e-10	reported	ukb-b-3957	igd	2	1	TRUE	NA	NA	NA	NA	NA	NA	NA	8.48032e-05	39.2112
Sleeplessness / insomnia || id:ukb-b-3957	14	rs17709610	G	A	G	A	-0.0099161	-0.0003	0.297979	0.2901	FALSE	FALSE	FALSE	ieu-b-7	10	104250278	0.0195	482730	0.9888	Parkinson's disease || id:ieu-b-7	Parkinson's disease	Parkinson's disease || ||	TRUE	igd	0.00162078	Sleeplessness / insomnia || id:ukb-b-3957	TRUE	9.49992e-10	reported	ukb-b-3957	igd	2	1	TRUE	NA	NA	NA	NA	NA	NA	NA	8.09536e-05	37.431
Sleeplessness / insomnia || id:ukb-b-3957	15	rs1988337	G	A	G	A	0.00838726	0.0237	0.552395	0.5559	FALSE	FALSE	FALSE	ieu-b-7	4	91292200	0.0185	482730	0.2005	Parkinson's disease || id:ieu-b-7	Parkinson's disease	Parkinson's disease || ||	TRUE	igd	0.00149645	Sleeplessness / insomnia || id:ukb-b-3957	TRUE	2.1e-08	reported	ukb-b-3957	igd	2	1	TRUE	NA	NA	NA	NA	NA	NA	NA	6.79397e-05	31.4133
Sleeplessness / insomnia || id:ukb-b-3957	16	rs2014830	T	C	T	C	-0.0116018	-0.0052	0.303519	0.3187	FALSE	FALSE	FALSE	ieu-b-7	3	50172397	0.0184	482730	0.7776	Parkinson's disease || id:ieu-b-7	Parkinson's disease	Parkinson's disease || ||	TRUE	igd	0.0016233	Sleeplessness / insomnia || id:ukb-b-3957	TRUE	8.9002e-13	reported	ukb-b-3957	igd	2	1	TRUE	NA	NA	NA	NA	NA	NA	NA	0.00011047	51.08
Sleeplessness / insomnia || id:ukb-b-3957	17	rs2062113	C	T	C	T	-0.00961678	-0.0237	0.568257	0.5479	FALSE	FALSE	FALSE	ieu-b-7	16	59476179	0.0224	468692	0.2887	Parkinson's disease || id:ieu-b-7	Parkinson's disease	Parkinson's disease || ||	TRUE	igd	0.00150275	Sleeplessness / insomnia || id:ukb-b-3957	TRUE	1.6e-10	reported	ukb-b-3957	igd	2	1	TRUE	NA	NA	NA	NA	NA	NA	NA	8.85697e-05	40.9528
Sleeplessness / insomnia || id:ukb-b-3957	18	rs224032	A	G	A	G	0.00839066	0.0018	0.550358	0.5357	FALSE	FALSE	FALSE	ieu-b-7	10	64521829	0.0172	482730	0.9153	Parkinson's disease || id:ieu-b-7	Parkinson's disease	Parkinson's disease || ||	TRUE	igd	0.00149108	Sleeplessness / insomnia || id:ukb-b-3957	TRUE	1.79999e-08	reported	ukb-b-3957	igd	2	1	TRUE	NA	NA	NA	NA	NA	NA	NA	6.84854e-05	31.6657
Sleeplessness / insomnia || id:ukb-b-3957	19	rs2297787	A	T	A	T	-0.0178001	-0.013	0.080193	0.0832	FALSE	TRUE	FALSE	ieu-b-7	10	104685299	0.0303	482730	0.6694	Parkinson's disease || id:ieu-b-7	Parkinson's disease	Parkinson's disease || ||	TRUE	igd	0.00274996	Sleeplessness / insomnia || id:ukb-b-3957	TRUE	9.60064e-11	reported	ukb-b-3957	igd	2	1	TRUE	TRUE	rs2297787	rs12411886	A	T	A	C	9.0613e-05	41.8977
Sleeplessness / insomnia || id:ukb-b-3957	20	rs2604551	G	T	G	T	-0.00848084	0.0202	0.640384	0.6656	FALSE	FALSE	FALSE	ieu-b-7	4	15093831	0.0196	482730	0.3038	Parkinson's disease || id:ieu-b-7	Parkinson's disease	Parkinson's disease || ||	TRUE	igd	0.00155238	Sleeplessness / insomnia || id:ukb-b-3957	TRUE	4.70002e-08	reported	ukb-b-3957	igd	2	1	TRUE	TRUE	rs2604551	rs2702554	T	G	C	T	6.45493e-05	29.8456
Sleeplessness / insomnia || id:ukb-b-3957	21	rs314280	G	A	G	A	0.00971363	0.0146	0.547047	0.5544	FALSE	FALSE	FALSE	ieu-b-7	6	105400837	0.0179	482730	0.4159	Parkinson's disease || id:ieu-b-7	Parkinson's disease	Parkinson's disease || ||	TRUE	igd	0.00149134	Sleeplessness / insomnia || id:ukb-b-3957	TRUE	7.29962e-11	reported	ukb-b-3957	igd	2	1	TRUE	NA	NA	NA	NA	NA	NA	NA	9.17503e-05	42.4236
Sleeplessness / insomnia || id:ukb-b-3957	22	rs324017	C	A	C	A	-0.00988248	-0.0058	0.705433	0.7595	FALSE	FALSE	FALSE	ieu-b-7	12	57490100	0.0218	482730	0.7914	Parkinson's disease || id:ieu-b-7	Parkinson's disease	Parkinson's disease || ||	TRUE	igd	0.00163145	Sleeplessness / insomnia || id:ukb-b-3957	TRUE	1.40001e-09	reported	ukb-b-3957	igd	2	1	TRUE	TRUE	rs324017	rs324015	A	C	T	C	7.93574e-05	36.6929
Sleeplessness / insomnia || id:ukb-b-3957	23	rs4572538	T	C	T	C	-0.00960596	-0.041	0.364055	0.3766	FALSE	FALSE	FALSE	ieu-b-7	2	147423012	0.0237	468692	0.08314	Parkinson's disease || id:ieu-b-7	Parkinson's disease	Parkinson's disease || ||	TRUE	igd	0.00156161	Sleeplessness / insomnia || id:ukb-b-3957	TRUE	7.69999e-10	reported	ukb-b-3957	igd	2	1	TRUE	NA	NA	NA	NA	NA	NA	NA	8.18349e-05	37.8386
Sleeplessness / insomnia || id:ukb-b-3957	24	rs4886860	C	G	C	G	-0.011796	0.0178	0.767408	0.7808	FALSE	TRUE	FALSE	ieu-b-7	15	74340336	0.023	482730	0.4378	Parkinson's disease || id:ieu-b-7	Parkinson's disease	Parkinson's disease || ||	TRUE	igd	0.00175566	Sleeplessness / insomnia || id:ukb-b-3957	TRUE	1.80011e-11	reported	ukb-b-3957	igd	2	1	TRUE	NA	NA	NA	NA	NA	NA	NA	9.76301e-05	45.1426
Sleeplessness / insomnia || id:ukb-b-3957	25	rs56093896	A	C	A	C	-0.0124111	-0.0196	0.214053	0.2132	FALSE	FALSE	FALSE	ieu-b-7	2	114103966	0.0272	468692	0.4711	Parkinson's disease || id:ieu-b-7	Parkinson's disease	Parkinson's disease || ||	TRUE	igd	0.00181352	Sleeplessness / insomnia || id:ukb-b-3957	TRUE	7.70016e-12	reported	ukb-b-3957	igd	2	1	TRUE	NA	NA	NA	NA	NA	NA	NA	0.000101291	46.8354
Sleeplessness / insomnia || id:ukb-b-3957	26	rs56330606	G	A	G	A	0.00930932	0.0345	0.378954	0.3564	FALSE	FALSE	FALSE	ieu-b-7	19	37673953	0.0176	482730	0.0500196	Parkinson's disease || id:ieu-b-7	Parkinson's disease	Parkinson's disease || ||	TRUE	igd	0.00153044	Sleeplessness / insomnia || id:ukb-b-3957	TRUE	1.2e-09	reported	ukb-b-3957	igd	2	1	TRUE	NA	NA	NA	NA	NA	NA	NA	8.00214e-05	37
Sleeplessness / insomnia || id:ukb-b-3957	27	rs56365214	A	C	A	C	-0.0147948	-0.0096	0.155781	0.1485	FALSE	FALSE	FALSE	ieu-b-7	2	58930167	0.0312	468692	0.7596	Parkinson's disease || id:ieu-b-7	Parkinson's disease	Parkinson's disease || ||	TRUE	igd	0.00205225	Sleeplessness / insomnia || id:ukb-b-3957	TRUE	5.60015e-13	reported	ukb-b-3957	igd	2	1	TRUE	NA	NA	NA	NA	NA	NA	NA	0.000112395	51.9704
Sleeplessness / insomnia || id:ukb-b-3957	28	rs6561715	A	T	A	T	-0.011623	-0.0056	0.630662	0.633	FALSE	TRUE	FALSE	ieu-b-7	13	53888526	0.0198	482730	0.7756	Parkinson's disease || id:ieu-b-7	Parkinson's disease	Parkinson's disease || ||	TRUE	igd	0.00154234	Sleeplessness / insomnia || id:ukb-b-3957	TRUE	4.79954e-14	reported	ukb-b-3957	igd	2	1	TRUE	NA	NA	NA	NA	NA	NA	NA	0.000122818	56.7903
Sleeplessness / insomnia || id:ukb-b-3957	29	rs6690017	G	T	G	T	-0.0102669	-0.0405	0.408855	0.4113	FALSE	FALSE	FALSE	ieu-b-7	1	57842729	0.0226	468692	0.0731998	Parkinson's disease || id:ieu-b-7	Parkinson's disease	Parkinson's disease || ||	TRUE	igd	0.00151022	Sleeplessness / insomnia || id:ukb-b-3957	TRUE	1.10002e-11	reported	ukb-b-3957	igd	2	1	TRUE	NA	NA	NA	NA	NA	NA	NA	9.99522e-05	46.2164
Sleeplessness / insomnia || id:ukb-b-3957	30	rs68094047	T	C	T	C	0.0103356	-0.0325	0.251267	0.2574	FALSE	FALSE	FALSE	ieu-b-7	12	109855201	0.0207	482730	0.1166	Parkinson's disease || id:ieu-b-7	Parkinson's disease	Parkinson's disease || ||	TRUE	igd	0.0017167	Sleeplessness / insomnia || id:ukb-b-3957	TRUE	1.7e-09	reported	ukb-b-3957	igd	2	1	TRUE	NA	NA	NA	NA	NA	NA	NA	7.83946e-05	36.2477
Sleeplessness / insomnia || id:ukb-b-3957	31	rs6975972	G	A	G	A	-0.00902066	0.0054	0.578726	0.5724	FALSE	FALSE	FALSE	ieu-b-7	7	1070468	0.0177	482730	0.7622	Parkinson's disease || id:ieu-b-7	Parkinson's disease	Parkinson's disease || ||	TRUE	igd	0.00150428	Sleeplessness / insomnia || id:ukb-b-3957	TRUE	2e-09	reported	ukb-b-3957	igd	2	1	TRUE	NA	NA	NA	NA	NA	NA	NA	7.7772e-05	35.9598
Sleeplessness / insomnia || id:ukb-b-3957	32	rs705219	A	T	A	T	0.013423	0.0093	0.887373	0.8931	FALSE	TRUE	FALSE	ieu-b-7	3	117702270	0.0311	482730	0.7636	Parkinson's disease || id:ieu-b-7	Parkinson's disease	Parkinson's disease || ||	TRUE	igd	0.00235299	Sleeplessness / insomnia || id:ukb-b-3957	TRUE	1.2e-08	reported	ukb-b-3957	igd	2	1	TRUE	NA	NA	NA	NA	NA	NA	NA	7.03827e-05	32.543
Sleeplessness / insomnia || id:ukb-b-3957	33	rs72924721	T	C	T	C	0.016478	-0.0008	0.073137	0.0701	FALSE	FALSE	FALSE	ieu-b-7	11	65585990	0.0355	482730	0.9822	Parkinson's disease || id:ieu-b-7	Parkinson's disease	Parkinson's disease || ||	TRUE	igd	0.00288103	Sleeplessness / insomnia || id:ukb-b-3957	TRUE	1.09999e-08	reported	ukb-b-3957	igd	2	1	TRUE	NA	NA	NA	NA	NA	NA	NA	7.0749e-05	32.7123
Sleeplessness / insomnia || id:ukb-b-3957	34	rs7711696	T	G	T	G	0.0111716	0.0158	0.305042	0.3106	FALSE	FALSE	FALSE	ieu-b-7	5	135486536	0.0242	468692	0.5144	Parkinson's disease || id:ieu-b-7	Parkinson's disease	Parkinson's disease || ||	TRUE	igd	0.00161138	Sleeplessness / insomnia || id:ukb-b-3957	TRUE	4.10015e-12	reported	ukb-b-3957	igd	2	1	TRUE	NA	NA	NA	NA	NA	NA	NA	0.000103951	48.0654
Sleeplessness / insomnia || id:ukb-b-3957	35	rs931221	A	T	A	T	0.0106361	-0.0215	0.236738	0.2589	FALSE	TRUE	FALSE	ieu-b-7	12	84727318	0.0218	482730	0.324	Parkinson's disease || id:ieu-b-7	Parkinson's disease	Parkinson's disease || ||	TRUE	igd	0.00175313	Sleeplessness / insomnia || id:ukb-b-3957	TRUE	1.29999e-09	reported	ukb-b-3957	igd	2	1	TRUE	TRUE	rs931221	rs1116598	A	T	G	A	7.96049e-05	36.8074
Sleeplessness / insomnia || id:ukb-b-3957	36	rs9570080	C	T	C	T	-0.0106379	0.0256	0.344131	0.3416	FALSE	FALSE	FALSE	ieu-b-7	13	59832775	0.0215	481203	0.2353	Parkinson's disease || id:ieu-b-7	Parkinson's disease	Parkinson's disease || ||	TRUE	igd	0.00157858	Sleeplessness / insomnia || id:ukb-b-3957	TRUE	1.59993e-11	reported	ukb-b-3957	igd	2	1	TRUE	NA	NA	NA	NA	NA	NA	NA	9.8214e-05	45.4126
Sleeplessness / insomnia || id:ukb-b-3957	37	rs9845387	A	C	A	C	-0.0218562	-0.1308	0.040279	0.0378	FALSE	FALSE	FALSE	ieu-b-7	3	116425935	0.0624	468692	0.0361901	Parkinson's disease || id:ieu-b-7	Parkinson's disease	Parkinson's disease || ||	TRUE	igd	0.00377648	Sleeplessness / insomnia || id:ukb-b-3957	TRUE	7.10003e-09	reported	ukb-b-3957	igd	2	1	TRUE	NA	NA	NA	NA	NA	NA	NA	7.24404e-05	33.4945
Sleeplessness / insomnia || id:ukb-b-3957	38	rs9894577	A	G	A	G	0.0132051	0.0284	0.3182	0.3282	FALSE	FALSE	FALSE	ieu-b-7	17	43223292	0.0184	482730	0.1234	Parkinson's disease || id:ieu-b-7	Parkinson's disease	Parkinson's disease || ||	TRUE	igd	0.00159687	Sleeplessness / insomnia || id:ukb-b-3957	TRUE	1.29987e-16	reported	ukb-b-3957	igd	2	1	TRUE	NA	NA	NA	NA	NA	NA	NA	0.000147883	68.3821
Sleeplessness / insomnia || id:ukb-b-3957	39	rs9906181	G	A	G	A	-0.00915026	0.0161	0.687567	0.6814	FALSE	FALSE	FALSE	ieu-b-7	17	21297686	0.0338	11518	0.6332	Parkinson's disease || id:ieu-b-7	Parkinson's disease	Parkinson's disease || ||	TRUE	igd	0.00163869	Sleeplessness / insomnia || id:ukb-b-3957	TRUE	2.39999e-08	reported	ukb-b-3957	igd	2	1	TRUE	NA	NA	NA	NA	NA	NA	NA	6.74344e-05	31.1797
Snoring	1	rs10878269	C	T	C	T	-0.009	-0.054	0.35	0.6435	FALSE	FALSE	FALSE	ieu-b-7	12	65791463	0.0188	482730	0.00411197	Parkinson's disease || id:ieu-b-7	Parkinson's disease	Parkinson's disease || ||	TRUE	igd	0.001	Snoring	TRUE	2.25718e-19	inferred	OxuyVD	textfile	2	1	TRUE	NA	NA	NA	NA	NA	NA	NA
Snoring	2	rs11018488	A	T	A	T	0.007	0.0204	0.364	0.3912	FALSE	TRUE	FALSE	ieu-b-7	11	88861590	0.0219	27693	0.3516	Parkinson's disease || id:ieu-b-7	Parkinson's disease	Parkinson's disease || ||	TRUE	igd	0.001	Snoring	TRUE	2.55963e-12	inferred	OxuyVD	textfile	2	1	TRUE	NA	NA	NA	NA	NA	NA	NA
Snoring	3	rs12119849	G	A	G	A	-0.012	-0.0212	0.083	0.9157	FALSE	FALSE	FALSE	ieu-b-7	1	96878072	0.0411	469691	0.6061	Parkinson's disease || id:ieu-b-7	Parkinson's disease	Parkinson's disease || ||	TRUE	igd	0.002	Snoring	TRUE	1.97318e-09	inferred	OxuyVD	textfile	2	1	TRUE	NA	NA	NA	NA	NA	NA	NA
Snoring	4	rs12429765	A	G	A	G	0.007	-0.004	0.493	0.5186	FALSE	FALSE	FALSE	ieu-b-7	13	40745860	0.0179	482730	0.8233	Parkinson's disease || id:ieu-b-7	Parkinson's disease	Parkinson's disease || ||	TRUE	igd	0.001	Snoring	TRUE	2.55963e-12	inferred	OxuyVD	textfile	2	1	TRUE	NA	NA	NA	NA	NA	NA	NA
Snoring	5	rs13251292	A	G	A	G	-0.007	-0.0128	0.415	0.5866	FALSE	FALSE	FALSE	ieu-b-7	8	71474355	0.0226	470485	0.5706	Parkinson's disease || id:ieu-b-7	Parkinson's disease	Parkinson's disease || ||	TRUE	igd	0.001	Snoring	TRUE	2.55963e-12	inferred	OxuyVD	textfile	2	1	TRUE	NA	NA	NA	NA	NA	NA	NA
Snoring	6	rs145367119	C	T	C	T	0.006	0.0275	0.431	0.5623	FALSE	FALSE	FALSE	ieu-b-7	3	90127762	0.0225	468692	0.2228	Parkinson's disease || id:ieu-b-7	Parkinson's disease	Parkinson's disease || ||	TRUE	igd	0.001	Snoring	TRUE	1.97318e-09	inferred	OxuyVD	textfile	2	1	TRUE	TRUE	rs145367119	rs4974357	T	C	C	TRUE
Snoring	7	rs17060460	A	G	A	G	-0.007	0.0293	0.235	0.7791	FALSE	FALSE	FALSE	ieu-b-7	6	100827834	0.0229	482730	0.2006	Parkinson's disease || id:ieu-b-7	Parkinson's disease	Parkinson's disease || ||	TRUE	igd	0.001	Snoring	TRUE	2.55963e-12	inferred	OxuyVD	textfile	2	1	TRUE	NA	NA	NA	NA	NA	NA	NA
Snoring	8	rs17151229	G	C	G	C	-0.007	-0.0322	0.354	0.3328	FALSE	TRUE	FALSE	ieu-b-7	7	127382155	0.0195	482730	0.0995405	Parkinson's disease || id:ieu-b-7	Parkinson's disease	Parkinson's disease || ||	TRUE	igd	0.001	Snoring	TRUE	2.55963e-12	inferred	OxuyVD	textfile	2	1	TRUE	NA	NA	NA	NA	NA	NA	NA
Snoring	9	rs180107	A	T	A	T	-0.007	-0.0173	0.37	0.4099	FALSE	TRUE	FALSE	ieu-b-7	17	67930772	0.0227	468692	0.4472	Parkinson's disease || id:ieu-b-7	Parkinson's disease	Parkinson's disease || ||	TRUE	igd	0.001	Snoring	TRUE	2.55963e-12	inferred	OxuyVD	textfile	2	1	TRUE	NA	NA	NA	NA	NA	NA	NA
Snoring	10	rs2049045	G	C	G	C	0.008	-0.0042	0.191	0.1943	FALSE	TRUE	FALSE	ieu-b-7	11	27694241	0.0215	482730	0.8447	Parkinson's disease || id:ieu-b-7	Parkinson's disease	Parkinson's disease || ||	TRUE	igd	0.001	Snoring	TRUE	1.24419e-15	inferred	OxuyVD	textfile	2	1	TRUE	NA	NA	NA	NA	NA	NA	NA
Snoring	11	rs2207944	T	C	T	C	-0.006	-0.0358	0.457	0.5536	FALSE	FALSE	FALSE	ieu-b-7	6	84307328	0.0222	468692	0.1074	Parkinson's disease || id:ieu-b-7	Parkinson's disease	Parkinson's disease || ||	TRUE	igd	0.001	Snoring	TRUE	1.97318e-09	inferred	OxuyVD	textfile	2	1	TRUE	NA	NA	NA	NA	NA	NA	NA
Snoring	12	rs2307111	T	C	T	C	0.008	0.0002	0.396	0.5934	FALSE	FALSE	FALSE	ieu-b-7	5	75003678	0.0174	482730	0.9913	Parkinson's disease || id:ieu-b-7	Parkinson's disease	Parkinson's disease || ||	TRUE	igd	0.001	Snoring	TRUE	1.24419e-15	inferred	OxuyVD	textfile	2	1	TRUE	NA	NA	NA	NA	NA	NA	NA
Snoring	13	rs2664299	T	C	T	C	0.008	-0.0068	0.415	0.5852	FALSE	FALSE	FALSE	ieu-b-7	14	99742187	0.0224	468692	0.762901	Parkinson's disease || id:ieu-b-7	Parkinson's disease	Parkinson's disease || ||	TRUE	igd	0.001	Snoring	TRUE	1.24419e-15	inferred	OxuyVD	textfile	2	1	TRUE	NA	NA	NA	NA	NA	NA	NA
Snoring	14	rs34811474	G	A	G	A	0.008	-0.0547	0.217	0.7802	FALSE	FALSE	FALSE	ieu-b-7	4	25408838	0.0212	482730	0.009794	Parkinson's disease || id:ieu-b-7	Parkinson's disease	Parkinson's disease || ||	TRUE	igd	0.001	Snoring	TRUE	1.24419e-15	inferred	OxuyVD	textfile	2	1	TRUE	NA	NA	NA	NA	NA	NA	NA
Snoring	15	rs4744369	T	A	T	A	-0.006	-0.0527	0.396	0.4119	FALSE	TRUE	FALSE	ieu-b-7	9	97475396	0.0228	468692	0.0206001	Parkinson's disease || id:ieu-b-7	Parkinson's disease	Parkinson's disease || ||	TRUE	igd	0.001	Snoring	TRUE	1.97318e-09	inferred	OxuyVD	textfile	2	1	TRUE	NA	NA	NA	NA	NA	NA	NA
Snoring	16	rs4976269	G	A	G	A	0.007	-0.0033	0.341	0.6758	FALSE	FALSE	FALSE	ieu-b-7	5	134452597	0.0228	471013	0.8866	Parkinson's disease || id:ieu-b-7	Parkinson's disease	Parkinson's disease || ||	TRUE	igd	0.001	Snoring	TRUE	2.55963e-12	inferred	OxuyVD	textfile	2	1	TRUE	NA	NA	NA	NA	NA	NA	NA
Snoring	17	rs4987719	C	T	C	T	-0.016	0.1461	0.028	0.9691	FALSE	FALSE	FALSE	ieu-b-7	18	60960310	0.073	468692	0.0453002	Parkinson's disease || id:ieu-b-7	Parkinson's disease	Parkinson's disease || ||	TRUE	igd	0.003	Snoring	TRUE	9.64261e-08	inferred	OxuyVD	textfile	2	1	TRUE	NA	NA	NA	NA	NA	NA	NA
Snoring	18	rs57222984	A	G	A	G	-0.008	0.2205	0.265	0.759	FALSE	FALSE	FALSE	ieu-b-7	17	43758898	0.0259	480593	1.93508e-17	Parkinson's disease || id:ieu-b-7	Parkinson's disease	Parkinson's disease || ||	TRUE	igd	0.001	Snoring	TRUE	1.24419e-15	inferred	OxuyVD	textfile	2	1	TRUE	NA	NA	NA	NA	NA	NA	NA
Snoring	19	rs592333	A	G	A	G	-0.009	-0.0042	0.442	0.5608	FALSE	FALSE	FALSE	ieu-b-7	13	51340315	0.0206	482730	0.8366	Parkinson's disease || id:ieu-b-7	Parkinson's disease	Parkinson's disease || ||	TRUE	igd	0.001	Snoring	TRUE	2.25718e-19	inferred	OxuyVD	textfile	2	1	TRUE	NA	NA	NA	NA	NA	NA	NA
Snoring	20	rs6054427	G	A	G	A	-0.006	-0.0328	0.378	0.3636	FALSE	FALSE	FALSE	ieu-b-7	20	6635266	0.0183	482730	0.0725304	Parkinson's disease || id:ieu-b-7	Parkinson's disease	Parkinson's disease || ||	TRUE	igd	0.001	Snoring	TRUE	1.97318e-09	inferred	OxuyVD	textfile	2	1	TRUE	NA	NA	NA	NA	NA	NA	NA
Snoring	21	rs6099273	C	T	C	T	-0.007	-0.0174	0.235	0.754	FALSE	FALSE	FALSE	ieu-b-7	20	55347828	0.0263	468692	0.5072	Parkinson's disease || id:ieu-b-7	Parkinson's disease	Parkinson's disease || ||	TRUE	igd	0.001	Snoring	TRUE	2.55963e-12	inferred	OxuyVD	textfile	2	1	TRUE	NA	NA	NA	NA	NA	NA	NA
Snoring	22	rs61597598	G	A	G	A	-0.012	-0.0014	0.116	0.8756	FALSE	FALSE	FALSE	ieu-b-7	2	156996626	0.0301	482730	0.9635	Parkinson's disease || id:ieu-b-7	Parkinson's disease	Parkinson's disease || ||	TRUE	igd	0.002	Snoring	TRUE	1.97318e-09	inferred	OxuyVD	textfile	2	1	TRUE	NA	NA	NA	NA	NA	NA	NA
Snoring	23	rs725861	A	G	A	G	-0.009	0.0648	0.192	0.8077	FALSE	FALSE	FALSE	ieu-b-7	10	9063776	0.0284	468692	0.02261	Parkinson's disease || id:ieu-b-7	Parkinson's disease	Parkinson's disease || ||	TRUE	igd	0.001	Snoring	TRUE	2.25718e-19	inferred	OxuyVD	textfile	2	1	TRUE	NA	NA	NA	NA	NA	NA	NA
Snoring	24	rs7829639	A	G	A	G	-0.007	0.0097	0.297	0.2782	FALSE	FALSE	FALSE	ieu-b-7	8	78233600	0.0206	482730	0.6384	Parkinson's disease || id:ieu-b-7	Parkinson's disease	Parkinson's disease || ||	TRUE	igd	0.001	Snoring	TRUE	2.55963e-12	inferred	OxuyVD	textfile	2	1	TRUE	TRUE	rs7829639	rs7005777	A	G	G	TRUE
Snoring	25	rs80093081	T	G	T	G	0.006	0.0314	0.292	0.3004	FALSE	FALSE	FALSE	ieu-b-7	1	39719346	0.0193	482730	0.1045	Parkinson's disease || id:ieu-b-7	Parkinson's disease	Parkinson's disease || ||	TRUE	igd	0.001	Snoring	TRUE	1.97318e-09	inferred	OxuyVD	textfile	2	1	TRUE	TRUE	rs80093081	rs11205828	T	G	C	TRUE
Snoring	26	rs8069947	C	T	C	T	0.007	-0.0169	0.488	0.5402	FALSE	FALSE	FALSE	ieu-b-7	17	1985843	0.0219	471013	0.4411	Parkinson's disease || id:ieu-b-7	Parkinson's disease	Parkinson's disease || ||	TRUE	igd	0.001	Snoring	TRUE	2.55963e-12	inferred	OxuyVD	textfile	2	1	TRUE	NA	NA	NA	NA	NA	NA	NA
Snoring	27	rs8108822	C	T	C	T	0.011	0.0246	0.102	0.9046	FALSE	FALSE	FALSE	ieu-b-7	19	32183171	0.0381	468692	0.5177	Parkinson's disease || id:ieu-b-7	Parkinson's disease	Parkinson's disease || ||	TRUE	igd	0.002	Snoring	TRUE	3.79791e-08	inferred	OxuyVD	textfile	2	1	TRUE	NA	NA	NA	NA	NA	NA	NA
Snoring	28	rs947612	G	A	G	A	0.007	0.0131	0.229	0.2477	FALSE	FALSE	FALSE	ieu-b-7	6	73738661	0.0259	468692	0.612999	Parkinson's disease || id:ieu-b-7	Parkinson's disease	Parkinson's disease || ||	TRUE	igd	0.001	Snoring	TRUE	2.55963e-12	inferred	OxuyVD	textfile	2	1	TRUE	NA	NA	NA	NA	NA	NA	NA
Snoring	29	rs9583546	G	C	G	C	-0.006	-0.0011	0.369	0.349	FALSE	TRUE	FALSE	ieu-b-7	13	111566412	0.0235	468692	0.963	Parkinson's disease || id:ieu-b-7	Parkinson's disease	Parkinson's disease || ||	TRUE	igd	0.001	Snoring	TRUE	1.97318e-09	inferred	OxuyVD	textfile	2	1	TRUE	NA	NA	NA	NA	NA	NA	NA
Sleep disorders || id:ukb-d-SLEEP	1	rs10110245	T	C	T	C	0.0010352	0.0099	0.369424	0.3807	FALSE	FALSE	FALSE	ieu-b-7	8	69670609	0.0233	468692	0.6703	Parkinson's disease || id:ieu-b-7	Parkinson's disease	Parkinson's disease || ||	TRUE	igd	0.000221738	Sleep disorders || id:ukb-d-SLEEP	TRUE	3.03389e-06	reported	ukb-d-SLEEP	igd	2	1	TRUE	TRUE	rs10110245	rs58399889	T	C	G	A	6.03395e-05	21.7955
Sleep disorders || id:ukb-d-SLEEP	2	rs11264014	T	C	T	C	0.00103961	0.0316	0.58265	0.5806	FALSE	FALSE	FALSE	ieu-b-7	1	37758312	0.0225	468692	0.1607	Parkinson's disease || id:ieu-b-7	Parkinson's disease	Parkinson's disease || ||	TRUE	igd	0.000215198	Sleep disorders || id:ukb-d-SLEEP	TRUE	1.35935e-06	reported	ukb-d-SLEEP	igd	2	1	TRUE								6.46094e-05	23.3379
Sleep disorders || id:ukb-d-SLEEP	3	rs114417992	C	G	C	G	0.00379742	0.0347	0.0178195	0.0214	FALSE	TRUE	FALSE	ieu-b-7	7	33944584	0.0825	468692	0.673899	Parkinson's disease || id:ieu-b-7	Parkinson's disease	Parkinson's disease || ||	TRUE	igd	0.00082067	Sleep disorders || id:ukb-d-SLEEP	TRUE	3.70732e-06	reported	ukb-d-SLEEP	igd	2	1	TRUE								5.92753e-05	21.411
Sleep disorders || id:ukb-d-SLEEP	4	rs11696552	T	A	T	A	0.00338214	-0.0619	0.0240443	0.0197	FALSE	TRUE	FALSE	ieu-b-7	20	44057287	0.0856	471013	0.4693	Parkinson's disease || id:ieu-b-7	Parkinson's disease	Parkinson's disease || ||	TRUE	igd	0.000728515	Sleep disorders || id:ukb-d-SLEEP	TRUE	3.4431e-06	reported	ukb-d-SLEEP	igd	2	1	TRUE								5.96678e-05	21.5528
Sleep disorders || id:ukb-d-SLEEP	5	rs117465627	G	T	G	T	0.00217861	0.0183	0.0539973	0.0508	FALSE	FALSE	FALSE	ieu-b-7	18	53941432	0.056	468692	0.7435	Parkinson's disease || id:ieu-b-7	Parkinson's disease	Parkinson's disease || ||	TRUE	igd	0.000468448	Sleep disorders || id:ukb-d-SLEEP	TRUE	3.30933e-06	reported	ukb-d-SLEEP	igd	2	1	TRUE								5.98783e-05	21.6289
Sleep disorders || id:ukb-d-SLEEP	6	rs117702518	A	G	A	G	0.00286946	0.0464	0.0316921	0.027	FALSE	FALSE	FALSE	ieu-b-7	9	14563908	0.0746	468692	0.5343	Parkinson's disease || id:ieu-b-7	Parkinson's disease	Parkinson's disease || ||	TRUE	igd	0.000604443	Sleep disorders || id:ukb-d-SLEEP	TRUE	2.06258e-06	reported	ukb-d-SLEEP	igd	2	1	TRUE								6.2391e-05	22.5365
Sleep disorders || id:ukb-d-SLEEP	7	rs117817275	C	T	C	T	0.00433423	-0.094	0.0125999	0.0126	FALSE	FALSE	FALSE	ieu-b-7	13	44142726	0.1178	468692	0.4247	Parkinson's disease || id:ieu-b-7	Parkinson's disease	Parkinson's disease || ||	TRUE	igd	0.000948233	Sleep disorders || id:ukb-d-SLEEP	TRUE	4.85926e-06	reported	ukb-d-SLEEP	igd	2	1	TRUE								5.784e-05	20.8925
Sleep disorders || id:ukb-d-SLEEP	8	rs12033773	A	T	A	T	0.00135043	0.0253	0.214664	0.2325	FALSE	TRUE	FALSE	ieu-b-7	1	11019873	0.0205	482730	0.2165	Parkinson's disease || id:ieu-b-7	Parkinson's disease	Parkinson's disease || ||	TRUE	igd	0.000261295	Sleep disorders || id:ukb-d-SLEEP	TRUE	2.3645e-07	reported	ukb-d-SLEEP	igd	2	1	TRUE								7.39451e-05	26.7103
Sleep disorders || id:ukb-d-SLEEP	9	rs12491893	A	G	A	G	0.00317032	-0.1727	0.0263936	0.0238	FALSE	FALSE	FALSE	ieu-b-7	3	11796464	0.0784	468692	0.0276102	Parkinson's disease || id:ieu-b-7	Parkinson's disease	Parkinson's disease || ||	TRUE	igd	0.000681218	Sleep disorders || id:ukb-d-SLEEP	TRUE	3.25829e-06	reported	ukb-d-SLEEP	igd	2	1	TRUE								5.99608e-05	21.6587
Sleep disorders || id:ukb-d-SLEEP	10	rs12712083	G	A	G	A	0.00114262	0.0124	0.418612	0.4431	FALSE	FALSE	FALSE	ieu-b-7	2	101508899	0.0202	482730	0.539499	Parkinson's disease || id:ieu-b-7	Parkinson's disease	Parkinson's disease || ||	TRUE	igd	0.000215547	Sleep disorders || id:ukb-d-SLEEP	TRUE	1.15234e-07	reported	ukb-d-SLEEP	igd	2	1	TRUE								7.77939e-05	28.1007
Sleep disorders || id:ukb-d-SLEEP	11	rs142438922	G	A	G	A	0.00398481	0.126	0.0166302	0.0146	FALSE	FALSE	FALSE	ieu-b-7	1	78885293	0.1023	468692	0.2181	Parkinson's disease || id:ieu-b-7	Parkinson's disease	Parkinson's disease || ||	TRUE	igd	0.000849187	Sleep disorders || id:ukb-d-SLEEP	TRUE	2.69985e-06	reported	ukb-d-SLEEP	igd	2	1	TRUE								6.09595e-05	22.0194
Sleep disorders || id:ukb-d-SLEEP	12	rs143798937	A	G	A	G	0.00326714	0.076	0.0250255	0.0268	FALSE	FALSE	FALSE	ieu-b-7	20	62723457	0.074	468692	0.3042	Parkinson's disease || id:ieu-b-7	Parkinson's disease	Parkinson's disease || ||	TRUE	igd	0.000686381	Sleep disorders || id:ukb-d-SLEEP	TRUE	1.93709e-06	reported	ukb-d-SLEEP	igd	2	1	TRUE								6.27245e-05	22.657
Sleep disorders || id:ukb-d-SLEEP	13	rs145662449	G	T	G	T	0.00246677	-0.0081	0.0477843	0.0462	FALSE	FALSE	FALSE	ieu-b-7	7	64684674	0.0561	470485	0.8856	Parkinson's disease || id:ieu-b-7	Parkinson's disease	Parkinson's disease || ||	TRUE	igd	0.000531814	Sleep disorders || id:ukb-d-SLEEP	TRUE	3.51237e-06	reported	ukb-d-SLEEP	igd	2	1	TRUE	TRUE	rs145662449	rs113890316	G	T	A	G	5.95623e-05	21.5147
Sleep disorders || id:ukb-d-SLEEP	14	rs1888992	C	G	C	G	0.0011015	0.0177	0.278683	0.279	FALSE	TRUE	FALSE	ieu-b-7	9	24722710	0.0232	482730	0.4454	Parkinson's disease || id:ieu-b-7	Parkinson's disease	Parkinson's disease || ||	TRUE	igd	0.000236003	Sleep disorders || id:ukb-d-SLEEP	TRUE	3.05302e-06	reported	ukb-d-SLEEP	igd	2	1	TRUE								6.03069e-05	21.7837
Sleep disorders || id:ukb-d-SLEEP	15	rs55638230	A	G	A	G	0.00376003	0.0114	0.0179635	0.0181	FALSE	FALSE	FALSE	ieu-b-7	6	53332864	0.0855	468692	0.8937	Parkinson's disease || id:ieu-b-7	Parkinson's disease	Parkinson's disease || ||	TRUE	igd	0.000811055	Sleep disorders || id:ukb-d-SLEEP	TRUE	3.55369e-06	reported	ukb-d-SLEEP	igd	2	1	TRUE	TRUE	rs55638230	rs10081059	A	G	T	A	5.94998e-05	21.4921
Sleep disorders || id:ukb-d-SLEEP	16	rs56222153	G	C	G	C	0.00174919	-0.0154	0.106544	0.1017	FALSE	TRUE	FALSE	ieu-b-7	1	117799597	0.0388	468692	0.692	Parkinson's disease || id:ieu-b-7	Parkinson's disease	Parkinson's disease || ||	TRUE	igd	0.000346438	Sleep disorders || id:ukb-d-SLEEP	TRUE	4.44201e-07	reported	ukb-d-SLEEP	igd	2	1	TRUE								7.05751e-05	25.493
Sleep disorders || id:ukb-d-SLEEP	17	rs73183437	T	C	T	C	0.0061793	-0.1633	0.00772657	0.0087	FALSE	FALSE	FALSE	ieu-b-7	13	45937561	0.1543	24677	0.2899	Parkinson's disease || id:ieu-b-7	Parkinson's disease	Parkinson's disease || ||	TRUE	igd	0.00127575	Sleep disorders || id:ukb-d-SLEEP	TRUE	1.27529e-06	reported	ukb-d-SLEEP	igd	2	1	TRUE								6.49499e-05	23.4609

## Sheet: Immunity on PD
The information of the SNPs used as IVs for the 91 circulating inflammatory proteins. (N=2640, P-value<5e-6)
exposure	NO	SNP	effect_allele.exposure	other_allele.exposure	effect_allele.outcome	other_allele.outcome	beta.exposure	beta.outcome	eaf.exposure	eaf.outcome	remove	palindromic	ambiguous	id.outcome	chr	pos	se.outcome	samplesize.outcome	pval.outcome	outcome	originalname.outcome	outcome.deprecated	mr_keep.outcome	data_source.outcome	proxy.outcome	target_snp.outcome	proxy_snp.outcome	target_a1.outcome	target_a2.outcome	proxy_a1.outcome	proxy_a2.outcome	chr.exposure	pos.exposure	se.exposure	pval.exposure	samplesize.exposure	exposure	mr_keep.exposure	pval_origin.exposure	id.exposure	data_source.exposure	action	SNP_index	mr_keep	R2	F
Fibroblast growth factor 21 levels	1	rs10495032	T	G	T	G	-0.1557	-0.0296	0.0383	0.0433	FALSE	FALSE	FALSE	ieu-b-7	1	216837226	0.0561	468692	0.5975	Parkinson's disease || id:ieu-b-7	Parkinson's disease	Parkinson's disease || ||	TRUE	igd	NA	NA	NA	NA	NA	NA	NA	1	216837226	0.0318	9.77e-07	14720	Fibroblast growth factor 21 levels	TRUE	reported	GCST90274788	textfile	2	1	TRUE	0.00162595	23.9698
Fibroblast growth factor 21 levels	2	rs12290350	T	C	T	C	-0.0689	0.0499	0.2168	0.2285	FALSE	FALSE	FALSE	ieu-b-7	11	76480255	0.0262	469691	0.05668	Parkinson's disease || id:ieu-b-7	Parkinson's disease	Parkinson's disease || ||	TRUE	igd	NA	NA	NA	NA	NA	NA	NA	11	76480255	0.0145	2.02e-06	14295	Fibroblast growth factor 21 levels	TRUE	reported	GCST90274788	textfile	2	1	TRUE	0.001577	22.5757
Fibroblast growth factor 21 levels	3	rs12532101	T	C	T	C	0.0659	0.0243	0.203	0.1897	FALSE	FALSE	FALSE	ieu-b-7	7	1194526	0.0289	468692	0.399	Parkinson's disease || id:ieu-b-7	Parkinson's disease	Parkinson's disease || ||	TRUE	igd	NA	NA	NA	NA	NA	NA	NA	7	1194526	0.0149	9.74e-06	14295	Fibroblast growth factor 21 levels	TRUE	reported	GCST90274788	textfile	2	1	TRUE	0.00136653	19.5586
Fibroblast growth factor 21 levels	4	rs1260326	T	C	T	C	0.1323	-0.0678	0.3977	0.4199	FALSE	FALSE	FALSE	ieu-b-7	2	27730940	0.0172	482730	8.23797e-05	Parkinson's disease || id:ieu-b-7	Parkinson's disease	Parkinson's disease || ||	TRUE	igd	NA	NA	NA	NA	NA	NA	NA	2	27730940	0.0119	1.03e-28	14730	Fibroblast growth factor 21 levels	TRUE	reported	GCST90274788	textfile	2	1	TRUE	0.00832135	123.585
Fibroblast growth factor 21 levels	5	rs12691469	T	C	T	C	-0.0541	-0.0342	0.6149	0.6282	FALSE	FALSE	FALSE	ieu-b-7	1	188409389	0.0195	482730	0.0799908	Parkinson's disease || id:ieu-b-7	Parkinson's disease	Parkinson's disease || ||	TRUE	igd	NA	NA	NA	NA	NA	NA	NA	1	188409389	0.0122	9.23e-06	14295	Fibroblast growth factor 21 levels	TRUE	reported	GCST90274788	textfile	2	1	TRUE	0.00137371	19.6614
Fibroblast growth factor 21 levels	6	rs12691469	T	C	T	C	-0.0541	-0.0342	0.6149	0.6282	FALSE	FALSE	FALSE	ieu-b-7	1	188409389	0.0195	482730	0.0799908	Parkinson's disease || id:ieu-b-7	Parkinson's disease	Parkinson's disease || ||	TRUE	igd	NA	NA	NA	NA	NA	NA	NA	1	188409389	0.0122	9.23e-06	14295	Fibroblast growth factor 21 levels	TRUE	reported	GCST90274788	textfile	2	2	TRUE	0.00137371	19.6614
Fibroblast growth factor 21 levels	7	rs13062487	A	G	A	G	0.0571	0.0527	0.3387	0.3306	FALSE	FALSE	FALSE	ieu-b-7	3	71944243	0.0238	468692	0.0265797	Parkinson's disease || id:ieu-b-7	Parkinson's disease	Parkinson's disease || ||	TRUE	igd	NA	NA	NA	NA	NA	NA	NA	3	71944243	0.0126	5.85e-06	14295	Fibroblast growth factor 21 levels	TRUE	reported	GCST90274788	textfile	2	1	TRUE	0.00143458	20.5338
Fibroblast growth factor 21 levels	8	rs13229619	A	G	A	G	-0.1609	0.0157	0.1297	0.121	FALSE	FALSE	FALSE	ieu-b-7	7	73030175	0.0261	482730	0.5472	Parkinson's disease || id:ieu-b-7	Parkinson's disease	Parkinson's disease || ||	TRUE	igd	NA	NA	NA	NA	NA	NA	NA	7	73030175	0.0176	6.13e-20	14743	Fibroblast growth factor 21 levels	TRUE	reported	GCST90274788	textfile	2	1	TRUE	0.00563697	83.5657
Fibroblast growth factor 21 levels	9	rs142603673	T	C	T	C	-0.2352	0.0335	0.0232	0.0203	FALSE	FALSE	FALSE	ieu-b-7	21	33860969	0.0849	468692	0.6933	Parkinson's disease || id:ieu-b-7	Parkinson's disease	Parkinson's disease || ||	TRUE	igd	NA	NA	NA	NA	NA	NA	NA	21	33860969	0.0455	2.35e-07	14252	Fibroblast growth factor 21 levels	TRUE	reported	GCST90274788	textfile	2	1	TRUE	0.00187138	26.7172
Fibroblast growth factor 21 levels	10	rs145127946	A	G	A	G	-0.1747	-0.0382	0.037	0.0366	FALSE	FALSE	FALSE	ieu-b-7	1	203746507	0.0661	468692	0.5634	Parkinson's disease || id:ieu-b-7	Parkinson's disease	Parkinson's disease || ||	TRUE	igd	NA	NA	NA	NA	NA	NA	NA	1	203746507	0.036	1.22e-06	14295	Fibroblast growth factor 21 levels	TRUE	reported	GCST90274788	textfile	2	1	TRUE	0.00164468	23.5462
Fibroblast growth factor 21 levels	11	rs149561599	T	G	T	G	0.1978	-0.0646	0.9786	0.9752	FALSE	FALSE	FALSE	ieu-b-7	22	20883740	0.0763	468692	0.397	Parkinson's disease || id:ieu-b-7	Parkinson's disease	Parkinson's disease || ||	TRUE	igd	NA	NA	NA	NA	NA	NA	NA	22	20883740	0.0444	8.39e-06	13869	Fibroblast growth factor 21 levels	TRUE	reported	GCST90274788	textfile	2	1	TRUE	0.00142896	19.8438
Fibroblast growth factor 21 levels	12	rs17284047	T	C	T	C	-0.2149	-0.0966	0.9794	0.9838	FALSE	FALSE	FALSE	ieu-b-7	3	100519020	0.0974	468692	0.3214	Parkinson's disease || id:ieu-b-7	Parkinson's disease	Parkinson's disease || ||	TRUE	igd	NA	NA	NA	NA	NA	NA	NA	3	100519020	0.0479	7.24e-06	14743	Fibroblast growth factor 21 levels	TRUE	reported	GCST90274788	textfile	2	1	TRUE	0.0013634	20.1253
Fibroblast growth factor 21 levels	13	rs188758663	A	G	A	G	-0.3801	-0.2643	0.0104	0.0097	FALSE	FALSE	FALSE	ieu-b-7	10	127847758	0.1794	11518	0.1408	Parkinson's disease || id:ieu-b-7	Parkinson's disease	Parkinson's disease || ||	TRUE	igd	NA	NA	NA	NA	NA	NA	NA	10	127847758	0.0749	3.88e-07	11668	Fibroblast growth factor 21 levels	TRUE	reported	GCST90274788	textfile	2	1	TRUE	0.00220231	25.7488
Fibroblast growth factor 21 levels	14	rs2429473	A	C	A	C	-0.0812	-0.0205	0.795	0.8142	FALSE	FALSE	FALSE	ieu-b-7	12	47198899	0.0254	482730	0.4186	Parkinson's disease || id:ieu-b-7	Parkinson's disease	Parkinson's disease || ||	TRUE	igd	NA	NA	NA	NA	NA	NA	NA	12	47198899	0.0147	3.32e-08	14295	Fibroblast growth factor 21 levels	TRUE	reported	GCST90274788	textfile	2	1	TRUE	0.00212994	30.5082
Fibroblast growth factor 21 levels	15	rs35852631	C	G	C	G	-0.0608	0.0503	0.2555	0.2608	FALSE	TRUE	FALSE	ieu-b-7	5	107955452	0.0254	468692	0.0478795	Parkinson's disease || id:ieu-b-7	Parkinson's disease	Parkinson's disease || ||	TRUE	igd	NA	NA	NA	NA	NA	NA	NA	5	107955452	0.0135	6.68e-06	14730	Fibroblast growth factor 21 levels	TRUE	reported	GCST90274788	textfile	2	1	TRUE	0.00137512	20.2806
Fibroblast growth factor 21 levels	16	rs374354803	A	G	A	G	0.1208	0.0209	0.9316	0.9309	FALSE	FALSE	FALSE	ieu-b-7	9	132342257	0.0455	468692	0.6455	Parkinson's disease || id:ieu-b-7	Parkinson's disease	Parkinson's disease || ||	TRUE	igd	TRUE	rs374354803	rs13290491	G	A	C	G	9	132338678	0.0266	5.59e-06	12198	Fibroblast growth factor 21 levels	TRUE	reported	GCST90274788	textfile	2	1	TRUE	0.00168791	20.6205
Fibroblast growth factor 21 levels	17	rs4700382	T	C	T	C	-0.063	-0.0217	0.2698	0.2567	FALSE	FALSE	FALSE	ieu-b-7	5	55882435	0.0321	13655	0.4996	Parkinson's disease || id:ieu-b-7	Parkinson's disease	Parkinson's disease || ||	TRUE	igd	NA	NA	NA	NA	NA	NA	NA	5	55882435	0.0136	3.62e-06	14295	Fibroblast growth factor 21 levels	TRUE	reported	GCST90274788	textfile	2	1	TRUE	0.00149888	21.4557
Fibroblast growth factor 21 levels	18	rs574044675	A	C	A	C	-0.1822	0.1448	0.9712	0.9933	FALSE	FALSE	FALSE	ieu-b-7	3	172276521	0.2582	11518	0.5749	Parkinson's disease || id:ieu-b-7	Parkinson's disease	Parkinson's disease || ||	TRUE	igd	TRUE	rs574044675	rs569213664	C	A	T	C	3	172274232	0.0406	7.2e-06	13181	Fibroblast growth factor 21 levels	TRUE	reported	GCST90274788	textfile	2	1	TRUE	0.00152557	20.1363
Fibroblast growth factor 21 levels	19	rs60277384	T	C	T	C	-0.0881	-0.0089	0.8922	0.8929	FALSE	FALSE	FALSE	ieu-b-7	5	84356011	0.0358	468692	0.8042	Parkinson's disease || id:ieu-b-7	Parkinson's disease	Parkinson's disease || ||	TRUE	igd	NA	NA	NA	NA	NA	NA	NA	5	84356011	0.019	3.54e-06	14742	Fibroblast growth factor 21 levels	TRUE	reported	GCST90274788	textfile	2	1	TRUE	0.00145631	21.4974
Fibroblast growth factor 21 levels	20	rs7012637	A	G	A	G	-0.0605	0.026	0.4812	0.4781	FALSE	FALSE	FALSE	ieu-b-7	8	9173209	0.0234	470485	0.2675	Parkinson's disease || id:ieu-b-7	Parkinson's disease	Parkinson's disease || ||	TRUE	igd	NA	NA	NA	NA	NA	NA	NA	8	9173209	0.012	4.61e-07	14295	Fibroblast growth factor 21 levels	TRUE	reported	GCST90274788	textfile	2	1	TRUE	0.00177498	25.4148
Fibroblast growth factor 21 levels	21	rs72965996	A	G	A	G	-0.2215	0.1294	0.031	0.0193	FALSE	FALSE	FALSE	ieu-b-7	18	72826607	0.0926	468692	0.1623	Parkinson's disease || id:ieu-b-7	Parkinson's disease	Parkinson's disease || ||	TRUE	igd	NA	NA	NA	NA	NA	NA	NA	18	72826607	0.0444	6.08e-07	13808	Fibroblast growth factor 21 levels	TRUE	reported	GCST90274788	textfile	2	1	TRUE	0.00179916	24.8839
Fibroblast growth factor 21 levels	22	rs7442192	A	G	A	G	0.0619	-0.0252	0.7357	0.7431	FALSE	FALSE	FALSE	ieu-b-7	4	45023201	0.0254	468692	0.3213	Parkinson's disease || id:ieu-b-7	Parkinson's disease	Parkinson's disease || ||	TRUE	igd	NA	NA	NA	NA	NA	NA	NA	4	45023201	0.0138	7.27e-06	14295	Fibroblast growth factor 21 levels	TRUE	reported	GCST90274788	textfile	2	1	TRUE	0.00140549	20.117
Fibroblast growth factor 21 levels	23	rs7610704	T	C	T	C	-0.0568	-0.0049	0.4644	0.4628	FALSE	FALSE	FALSE	ieu-b-7	3	11689679	0.0187	482730	0.7915	Parkinson's disease || id:ieu-b-7	Parkinson's disease	Parkinson's disease || ||	TRUE	igd	NA	NA	NA	NA	NA	NA	NA	3	11689679	0.012	2.21e-06	14295	Fibroblast growth factor 21 levels	TRUE	reported	GCST90274788	textfile	2	1	TRUE	0.00156484	22.4013
Fibroblast growth factor 21 levels	24	rs7834283	A	G	A	G	-0.3467	0.0801	0.01	0.0131	FALSE	FALSE	FALSE	ieu-b-7	8	135756614	0.15	10639	0.593401	Parkinson's disease || id:ieu-b-7	Parkinson's disease	Parkinson's disease || ||	TRUE	igd	TRUE	rs7834283	rs7813470	A	G	T	C	8	135756557	0.0784	9.77e-06	9555	Fibroblast growth factor 21 levels	TRUE	reported	GCST90274788	textfile	2	1	TRUE	0.00204248	19.5517
Fibroblast growth factor 21 levels	25	rs79789860	T	C	T	C	-0.2003	0.083	0.0209	0.0269	FALSE	FALSE	FALSE	ieu-b-7	7	114309511	0.0761	468692	0.2749	Parkinson's disease || id:ieu-b-7	Parkinson's disease	Parkinson's disease || ||	TRUE	igd	NA	NA	NA	NA	NA	NA	NA	7	114309511	0.0448	7.79e-06	14729	Fibroblast growth factor 21 levels	TRUE	reported	GCST90274788	textfile	2	1	TRUE	0.00135533	19.987
Fibroblast growth factor 21 levels	26	rs8191009	A	G	A	G	0.0678	-0.0116	0.1998	0.1973	FALSE	FALSE	FALSE	ieu-b-7	8	30545827	0.0273	471013	0.670199	Parkinson's disease || id:ieu-b-7	Parkinson's disease	Parkinson's disease || ||	TRUE	igd	NA	NA	NA	NA	NA	NA	NA	8	30545827	0.0151	7.12e-06	14295	Fibroblast growth factor 21 levels	TRUE	reported	GCST90274788	textfile	2	1	TRUE	0.00140835	20.1579
Fibroblast growth factor 21 levels	27	rs9974115	A	C	A	C	0.0758	0.0095	0.8308	0.8382	FALSE	FALSE	FALSE	ieu-b-7	21	37867322	0.0365	13655	0.7953	Parkinson's disease || id:ieu-b-7	Parkinson's disease	Parkinson's disease || ||	TRUE	igd	NA	NA	NA	NA	NA	NA	NA	21	37867322	0.0169	7.28e-06	14295	Fibroblast growth factor 21 levels	TRUE	reported	GCST90274788	textfile	2	1	TRUE	0.0014053	20.1143
Fibroblast growth factor 21 levels	28	rs9974115	A	C	A	C	0.0758	0.0095	0.8308	0.8382	FALSE	FALSE	FALSE	ieu-b-7	21	37867322	0.0365	13655	0.7953	Parkinson's disease || id:ieu-b-7	Parkinson's disease	Parkinson's disease || ||	TRUE	igd	NA	NA	NA	NA	NA	NA	NA	21	37867322	0.0169	7.28e-06	14295	Fibroblast growth factor 21 levels	TRUE	reported	GCST90274788	textfile	2	2	TRUE	0.0014053	20.1143
Tumor necrosis factor ligand superfamily member 12 levels	1	rs10010472	A	G	A	G	0.0559	-0.0103	0.7019	0.7041	FALSE	FALSE	FALSE	ieu-b-7	4	157843781	0.0209	482730	0.622499	Parkinson's disease || id:ieu-b-7	Parkinson's disease	Parkinson's disease || ||	TRUE	igd	NA	NA	NA	NA	NA	NA	NA	4	157843781	0.0126	9.14e-06	14732	Tumor necrosis factor ligand superfamily member 12 levels	TRUE	reported	GCST90274846	textfile	2	1	TRUE	0.00133426	19.6799
Tumor necrosis factor ligand superfamily member 12 levels	2	rs10818768	A	G	A	G	0.0522	-0.0205	0.5021	0.5067	FALSE	FALSE	FALSE	ieu-b-7	9	125709323	0.0235	468692	0.3838	Parkinson's disease || id:ieu-b-7	Parkinson's disease	Parkinson's disease || ||	TRUE	igd	NA	NA	NA	NA	NA	NA	NA	9	125709323	0.0118	9.7e-06	14288	Tumor necrosis factor ligand superfamily member 12 levels	TRUE	reported	GCST90274846	textfile	2	1	TRUE	0.00136776	19.5666
Tumor necrosis factor ligand superfamily member 12 levels	3	rs10831650	A	G	A	G	0.0692	0.0149	0.3558	0.369	FALSE	FALSE	FALSE	ieu-b-7	11	11644391	0.0231	468692	0.5194	Parkinson's disease || id:ieu-b-7	Parkinson's disease	Parkinson's disease || ||	TRUE	igd	NA	NA	NA	NA	NA	NA	NA	11	11644391	0.0125	3.09e-08	14288	Tumor necrosis factor ligand superfamily member 12 levels	TRUE	reported	GCST90274846	textfile	2	1	TRUE	0.00214038	30.643
Tumor necrosis factor ligand superfamily member 12 levels	4	rs11136339	T	C	T	C	0.0613	0.0346	0.388	0.4109	FALSE	FALSE	FALSE	ieu-b-7	8	145013345	0.018	480593	0.0545306	Parkinson's disease || id:ieu-b-7	Parkinson's disease	Parkinson's disease || ||	TRUE	igd	NA	NA	NA	NA	NA	NA	NA	8	145013345	0.0122	5.05e-07	13664	Tumor necrosis factor ligand superfamily member 12 levels	TRUE	reported	GCST90274846	textfile	2	1	TRUE	0.00184426	25.2428
Tumor necrosis factor ligand superfamily member 12 levels	5	rs111641307	C	G	C	G	-0.401	0.1063	0.9859	0.9907	FALSE	TRUE	FALSE	ieu-b-7	10	51775971	0.2536	10599	0.675	Parkinson's disease || id:ieu-b-7	Parkinson's disease	Parkinson's disease || ||	TRUE	igd	NA	NA	NA	NA	NA	NA	NA	10	51775971	0.0871	4.15e-06	10446	Tumor necrosis factor ligand superfamily member 12 levels	TRUE	reported	GCST90274846	textfile	2	1	TRUE	0.00202499	21.1919
Tumor necrosis factor ligand superfamily member 12 levels	6	rs11676293	A	G	A	G	0.0547	0.0385	0.3554	0.3559	FALSE	FALSE	FALSE	ieu-b-7	2	153624823	0.0275	13655	0.162	Parkinson's disease || id:ieu-b-7	Parkinson's disease	Parkinson's disease || ||	TRUE	igd	NA	NA	NA	NA	NA	NA	NA	2	153624823	0.012	5.16e-06	14721	Tumor necrosis factor ligand superfamily member 12 levels	TRUE	reported	GCST90274846	textfile	2	1	TRUE	0.00140949	20.7756
Tumor necrosis factor ligand superfamily member 12 levels	7	rs11738159	T	C	T	C	0.0577	-0.0148	0.4339	0.4353	FALSE	FALSE	FALSE	ieu-b-7	5	167311493	0.0225	468692	0.5094	Parkinson's disease || id:ieu-b-7	Parkinson's disease	Parkinson's disease || ||	TRUE	igd	NA	NA	NA	NA	NA	NA	NA	5	167311493	0.0119	1.24e-06	14288	Tumor necrosis factor ligand superfamily member 12 levels	TRUE	reported	GCST90274846	textfile	2	1	TRUE	0.00164275	23.507
Tumor necrosis factor ligand superfamily member 12 levels	8	rs117550445	C	G	C	G	-0.1855	-0.0658	0.9706	0.9736	FALSE	TRUE	FALSE	ieu-b-7	12	82487578	0.069	468692	0.3402	Parkinson's disease || id:ieu-b-7	Parkinson's disease	Parkinson's disease || ||	TRUE	igd	NA	NA	NA	NA	NA	NA	NA	12	82487578	0.0377	8.64e-07	14721	Tumor necrosis factor ligand superfamily member 12 levels	TRUE	reported	GCST90274846	textfile	2	1	TRUE	0.00164193	24.2073
Tumor necrosis factor ligand superfamily member 12 levels	9	rs11934678	C	G	C	G	-0.0969	0.0145	0.0955	0.0976	FALSE	TRUE	FALSE	ieu-b-7	4	181200669	0.0404	468692	0.719999	Parkinson's disease || id:ieu-b-7	Parkinson's disease	Parkinson's disease || ||	TRUE	igd	NA	NA	NA	NA	NA	NA	NA	4	181200669	0.0218	8.79e-06	14287	Tumor necrosis factor ligand superfamily member 12 levels	TRUE	reported	GCST90274846	textfile	2	1	TRUE	0.001381	19.7549
Tumor necrosis factor ligand superfamily member 12 levels	10	rs12145644	A	T	A	T	-0.0727	0.0157	0.2484	0.2472	FALSE	TRUE	FALSE	ieu-b-7	1	162517994	0.0268	468692	0.5585	Parkinson's disease || id:ieu-b-7	Parkinson's disease	Parkinson's disease || ||	TRUE	igd	NA	NA	NA	NA	NA	NA	NA	1	162517994	0.0141	2.52e-07	14287	Tumor necrosis factor ligand superfamily member 12 levels	TRUE	reported	GCST90274846	textfile	2	1	TRUE	0.0018573	26.5809
Tumor necrosis factor ligand superfamily member 12 levels	11	rs12726054	A	G	A	G	0.109	0.0783	0.0734	0.0694	FALSE	FALSE	FALSE	ieu-b-7	1	233623860	0.045	468692	0.08163	Parkinson's disease || id:ieu-b-7	Parkinson's disease	Parkinson's disease || ||	TRUE	igd	NA	NA	NA	NA	NA	NA	NA	1	233623860	0.0228	1.75e-06	14721	Tumor necrosis factor ligand superfamily member 12 levels	TRUE	reported	GCST90274846	textfile	2	1	TRUE	0.00155014	22.852
Tumor necrosis factor ligand superfamily member 12 levels	12	rs13107325	T	C	T	C	0.2027	-0.0311	0.0696	0.0751	FALSE	FALSE	FALSE	ieu-b-7	4	103188709	0.032	482730	0.3311	Parkinson's disease || id:ieu-b-7	Parkinson's disease	Parkinson's disease || ||	TRUE	igd	NA	NA	NA	NA	NA	NA	NA	4	103188709	0.0236	8.77e-18	14733	Tumor necrosis factor ligand superfamily member 12 levels	TRUE	reported	GCST90274846	textfile	2	1	TRUE	0.00498222	73.7606
Tumor necrosis factor ligand superfamily member 12 levels	13	rs144115221	T	C	T	C	0.2655	-0.054	0.0153	0.0119	FALSE	FALSE	FALSE	ieu-b-7	8	9389180	0.1122	469486	0.6303	Parkinson's disease || id:ieu-b-7	Parkinson's disease	Parkinson's disease || ||	TRUE	igd	NA	NA	NA	NA	NA	NA	NA	8	9389180	0.0582	5.07e-06	13944	Tumor necrosis factor ligand superfamily member 12 levels	TRUE	reported	GCST90274846	textfile	2	1	TRUE	0.00149021	20.8075
Tumor necrosis factor ligand superfamily member 12 levels	14	rs145667392	T	C	T	C	0.2414	0.0042	0.0278	0.0181	FALSE	FALSE	FALSE	ieu-b-7	13	46956927	0.1117	465249	0.9699	Parkinson's disease || id:ieu-b-7	Parkinson's disease	Parkinson's disease || ||	TRUE	igd	NA	NA	NA	NA	NA	NA	NA	13	46956927	0.0531	5.46e-06	11728	Tumor necrosis factor ligand superfamily member 12 levels	TRUE	reported	GCST90274846	textfile	2	1	TRUE	0.00175913	20.6639
Tumor necrosis factor ligand superfamily member 12 levels	15	rs1564995	A	G	A	G	-0.06	-0.0383	0.6158	0.6274	FALSE	FALSE	FALSE	ieu-b-7	11	24773107	0.0299	13655	0.1994	Parkinson's disease || id:ieu-b-7	Parkinson's disease	Parkinson's disease || ||	TRUE	igd	NA	NA	NA	NA	NA	NA	NA	11	24773107	0.0132	5.48e-06	14288	Tumor necrosis factor ligand superfamily member 12 levels	TRUE	reported	GCST90274846	textfile	2	1	TRUE	0.00144396	20.6583
Tumor necrosis factor ligand superfamily member 12 levels	16	rs16879825	A	G	A	G	-0.2027	-0.082	0.9577	0.9798	FALSE	FALSE	FALSE	ieu-b-7	6	88516736	0.0859	468692	0.3397	Parkinson's disease || id:ieu-b-7	Parkinson's disease	Parkinson's disease || ||	TRUE	igd	NA	NA	NA	NA	NA	NA	NA	6	88516736	0.0438	3.69e-06	11784	Tumor necrosis factor ligand superfamily member 12 levels	TRUE	reported	GCST90274846	textfile	2	1	TRUE	0.00181417	21.4134
Tumor necrosis factor ligand superfamily member 12 levels	17	rs1965399	A	G	A	G	-0.1312	0.0822	0.9544	0.9573	FALSE	FALSE	FALSE	ieu-b-7	3	142705695	0.0561	468692	0.143	Parkinson's disease || id:ieu-b-7	Parkinson's disease	Parkinson's disease || ||	TRUE	igd	NA	NA	NA	NA	NA	NA	NA	3	142705695	0.028	2.79e-06	14736	Tumor necrosis factor ligand superfamily member 12 levels	TRUE	reported	GCST90274846	textfile	2	1	TRUE	0.00148773	21.9529
Tumor necrosis factor ligand superfamily member 12 levels	18	rs2163333	A	G	A	G	0.1404	-0.0929	0.9522	0.9522	FALSE	FALSE	FALSE	ieu-b-7	2	53077754	0.0527	468692	0.0780908	Parkinson's disease || id:ieu-b-7	Parkinson's disease	Parkinson's disease || ||	TRUE	igd	NA	NA	NA	NA	NA	NA	NA	2	53077754	0.0273	2.71e-07	14719	Tumor necrosis factor ligand superfamily member 12 levels	TRUE	reported	GCST90274846	textfile	2	1	TRUE	0.0017937	26.4454
Tumor necrosis factor ligand superfamily member 12 levels	19	rs2220833	T	C	T	C	0.0559	-0.0532	0.6633	0.685	FALSE	FALSE	FALSE	ieu-b-7	13	110962155	0.0293	15976	0.0696001	Parkinson's disease || id:ieu-b-7	Parkinson's disease	Parkinson's disease || ||	TRUE	igd	TRUE	rs2220833	rs72655747	C	T	A	G	13	110957507	0.0126	9.14e-06	14731	Tumor necrosis factor ligand superfamily member 12 levels	TRUE	reported	GCST90274846	textfile	2	1	TRUE	0.00133435	19.6799
Tumor necrosis factor ligand superfamily member 12 levels	20	rs2738752	A	G	A	G	-0.0591	-0.0325	0.6653	0.6556	FALSE	FALSE	FALSE	ieu-b-7	1	221055463	0.0177	482730	0.0658006	Parkinson's disease || id:ieu-b-7	Parkinson's disease	Parkinson's disease || ||	TRUE	igd	TRUE	rs2738752	rs2247213	G	A	A	G	1	221052765	0.0129	4.62e-06	12848	Tumor necrosis factor ligand superfamily member 12 levels	TRUE	reported	GCST90274846	textfile	2	1	TRUE	0.00163099	20.9859
Tumor necrosis factor ligand superfamily member 12 levels	21	rs32923	A	G	A	G	-0.0588	0.0167	0.7435	0.7456	FALSE	FALSE	FALSE	ieu-b-7	5	141116062	0.0221	482730	0.4486	Parkinson's disease || id:ieu-b-7	Parkinson's disease	Parkinson's disease || ||	TRUE	igd	NA	NA	NA	NA	NA	NA	NA	5	141116062	0.0131	7.17e-06	14732	Tumor necrosis factor ligand superfamily member 12 levels	TRUE	reported	GCST90274846	textfile	2	1	TRUE	0.0013657	20.1443
Tumor necrosis factor ligand superfamily member 12 levels	22	rs34790908	T	C	T	C	0.211	-0.0073	0.2563	0.2657	FALSE	FALSE	FALSE	ieu-b-7	17	7451110	0.0198	482730	0.7116	Parkinson's disease || id:ieu-b-7	Parkinson's disease	Parkinson's disease || ||	TRUE	igd	NA	NA	NA	NA	NA	NA	NA	17	7451110	0.0129	3.9e-60	14732	Tumor necrosis factor ligand superfamily member 12 levels	TRUE	reported	GCST90274846	textfile	2	1	TRUE	0.0178364	267.502
Tumor necrosis factor ligand superfamily member 12 levels	23	rs3821473	A	G	A	G	-0.0622	0.0352	0.2327	0.2324	FALSE	FALSE	FALSE	ieu-b-7	3	59625877	0.0263	468692	0.1805	Parkinson's disease || id:ieu-b-7	Parkinson's disease	Parkinson's disease || ||	TRUE	igd	NA	NA	NA	NA	NA	NA	NA	3	59625877	0.0136	4.8e-06	14736	Tumor necrosis factor ligand superfamily member 12 levels	TRUE	reported	GCST90274846	textfile	2	1	TRUE	0.00141745	20.9143
Tumor necrosis factor ligand superfamily member 12 levels	24	rs4882710	T	C	T	C	0.0666	-0.0306	0.3457	0.3148	FALSE	FALSE	FALSE	ieu-b-7	12	129101566	0.0286	13655	0.2842	Parkinson's disease || id:ieu-b-7	Parkinson's disease	Parkinson's disease || ||	TRUE	igd	NA	NA	NA	NA	NA	NA	NA	12	129101566	0.0131	3.7e-07	14288	Tumor necrosis factor ligand superfamily member 12 levels	TRUE	reported	GCST90274846	textfile	2	1	TRUE	0.00180572	25.8431
Tumor necrosis factor ligand superfamily member 12 levels	25	rs56023600	T	C	T	C	-0.0856	0.0696	0.8764	0.8804	FALSE	FALSE	FALSE	ieu-b-7	9	5636355	0.0357	468692	0.0515098	Parkinson's disease || id:ieu-b-7	Parkinson's disease	Parkinson's disease || ||	TRUE	igd	NA	NA	NA	NA	NA	NA	NA	9	5636355	0.0186	4.18e-06	14287	Tumor necrosis factor ligand superfamily member 12 levels	TRUE	reported	GCST90274846	textfile	2	1	TRUE	0.00148026	21.1768
Tumor necrosis factor ligand superfamily member 12 levels	26	rs57053056	T	G	T	G	-0.0841	-0.0387	0.1057	0.1064	FALSE	FALSE	FALSE	ieu-b-7	3	128983680	0.0276	482730	0.1602	Parkinson's disease || id:ieu-b-7	Parkinson's disease	Parkinson's disease || ||	TRUE	igd	NA	NA	NA	NA	NA	NA	NA	3	128983680	0.0187	6.88e-06	14730	Tumor necrosis factor ligand superfamily member 12 levels	TRUE	reported	GCST90274846	textfile	2	1	TRUE	0.00137123	20.2232
Tumor necrosis factor ligand superfamily member 12 levels	27	rs575752535	T	C	T	C	-0.2262	0.0905	0.025	0.0239	FALSE	FALSE	FALSE	ieu-b-7	6	70731400	0.08	468692	0.258	Parkinson's disease || id:ieu-b-7	Parkinson's disease	Parkinson's disease || ||	TRUE	igd	TRUE	rs575752535	rs117799464	T	C	G	A	6	70682566	0.0471	1.57e-06	10894	Tumor necrosis factor ligand superfamily member 12 levels	TRUE	reported	GCST90274846	textfile	2	1	TRUE	0.0021127	23.0602
Tumor necrosis factor ligand superfamily member 12 levels	28	rs58743186	A	G	A	G	-0.0717	0.0249	0.1931	0.21	FALSE	FALSE	FALSE	ieu-b-7	11	130977775	0.027	468692	0.3562	Parkinson's disease || id:ieu-b-7	Parkinson's disease	Parkinson's disease || ||	TRUE	igd	TRUE	rs58743186	rs7936000	A	G	T	G	11	130975896	0.0154	3.23e-06	12818	Tumor necrosis factor ligand superfamily member 12 levels	TRUE	reported	GCST90274846	textfile	2	1	TRUE	0.00168827	21.6735
Tumor necrosis factor ligand superfamily member 12 levels	29	rs7019909	T	C	T	C	-0.0897	0.0232	0.1102	0.1045	FALSE	FALSE	FALSE	ieu-b-7	9	33113322	0.0372	468692	0.533801	Parkinson's disease || id:ieu-b-7	Parkinson's disease	Parkinson's disease || ||	TRUE	igd	NA	NA	NA	NA	NA	NA	NA	9	33113322	0.0193	3.36e-06	14288	Tumor necrosis factor ligand superfamily member 12 levels	TRUE	reported	GCST90274846	textfile	2	1	TRUE	0.00150953	21.5978
Tumor necrosis factor ligand superfamily member 12 levels	30	rs73133996	C	G	C	G	0.0812	-0.0171	0.4558	0.4603	FALSE	TRUE	TRUE	ieu-b-7	3	98431986	0.0226	468692	0.4474	Parkinson's disease || id:ieu-b-7	Parkinson's disease	Parkinson's disease || ||	TRUE	igd	TRUE	rs73133996	rs10935480	C	G	T	C	3	98429219	0.012	1.32e-11	14288	Tumor necrosis factor ligand superfamily member 12 levels	TRUE	reported	GCST90274846	textfile	2	1	FALSE	0.00319439	45.7814
Tumor necrosis factor ligand superfamily member 12 levels	31	rs73590361	T	C	T	C	-0.0744	-0.0467	0.1517	0.1401	FALSE	FALSE	FALSE	ieu-b-7	12	592399	0.0269	482730	0.0824992	Parkinson's disease || id:ieu-b-7	Parkinson's disease	Parkinson's disease || ||	TRUE	igd	NA	NA	NA	NA	NA	NA	NA	12	592399	0.0161	3.82e-06	14726	Tumor necrosis factor ligand superfamily member 12 levels	TRUE	reported	GCST90274846	textfile	2	1	TRUE	0.00144804	21.3518
Tumor necrosis factor ligand superfamily member 12 levels	32	rs7503751	A	G	A	G	-0.1386	-0.01	0.0779	0.0848	FALSE	FALSE	FALSE	ieu-b-7	17	7789542	0.0365	482730	0.7835	Parkinson's disease || id:ieu-b-7	Parkinson's disease	Parkinson's disease || ||	TRUE	igd	NA	NA	NA	NA	NA	NA	NA	17	7789542	0.0238	5.76e-09	14288	Tumor necrosis factor ligand superfamily member 12 levels	TRUE	reported	GCST90274846	textfile	2	1	TRUE	0.00236794	33.9087
Tumor necrosis factor ligand superfamily member 12 levels	33	rs76047473	T	C	T	C	0.1318	0.0957	0.0482	0.0471	FALSE	FALSE	FALSE	ieu-b-7	10	132815955	0.0641	13655	0.1354	Parkinson's disease || id:ieu-b-7	Parkinson's disease	Parkinson's disease || ||	TRUE	igd	NA	NA	NA	NA	NA	NA	NA	10	132815955	0.0286	4.06e-06	14718	Tumor necrosis factor ligand superfamily member 12 levels	TRUE	reported	GCST90274846	textfile	2	1	TRUE	0.00144087	21.2344
Tumor necrosis factor ligand superfamily member 12 levels	34	rs76047473	T	C	T	C	0.1318	0.0957	0.0482	0.0471	FALSE	FALSE	FALSE	ieu-b-7	10	132815955	0.0641	13655	0.1354	Parkinson's disease || id:ieu-b-7	Parkinson's disease	Parkinson's disease || ||	TRUE	igd	NA	NA	NA	NA	NA	NA	NA	10	132815955	0.0286	4.06e-06	14718	Tumor necrosis factor ligand superfamily member 12 levels	TRUE	reported	GCST90274846	textfile	2	2	TRUE	0.00144087	21.2344
Tumor necrosis factor ligand superfamily member 12 levels	35	rs76133364	A	C	A	C	0.1896	-0.1013	0.0315	0.0259	FALSE	FALSE	FALSE	ieu-b-7	19	19706214	0.0634	482730	0.1098	Parkinson's disease || id:ieu-b-7	Parkinson's disease	Parkinson's disease || ||	TRUE	igd	NA	NA	NA	NA	NA	NA	NA	19	19706214	0.0369	2.77e-07	13224	Tumor necrosis factor ligand superfamily member 12 levels	TRUE	reported	GCST90274846	textfile	2	1	TRUE	0.00199248	26.3972
Tumor necrosis factor ligand superfamily member 12 levels	36	rs76188822	A	C	A	C	-0.2352	-0.0485	0.9863	0.9844	FALSE	FALSE	FALSE	ieu-b-7	3	158730534	0.0903	468692	0.5911	Parkinson's disease || id:ieu-b-7	Parkinson's disease	Parkinson's disease || ||	TRUE	igd	NA	NA	NA	NA	NA	NA	NA	3	158730534	0.0525	7.46e-06	14736	Tumor necrosis factor ligand superfamily member 12 levels	TRUE	reported	GCST90274846	textfile	2	1	TRUE	0.00136015	20.0677
Tumor necrosis factor ligand superfamily member 12 levels	37	rs76854434	A	G	A	G	0.2416	0.0561	0.0173	0.0136	FALSE	FALSE	FALSE	ieu-b-7	2	140022077	0.1328	11518	0.672699	Parkinson's disease || id:ieu-b-7	Parkinson's disease	Parkinson's disease || ||	TRUE	igd	NA	NA	NA	NA	NA	NA	NA	2	140022077	0.0542	8.29e-06	14288	Tumor necrosis factor ligand superfamily member 12 levels	TRUE	reported	GCST90274846	textfile	2	1	TRUE	0.00138874	19.8671
Tumor necrosis factor ligand superfamily member 12 levels	38	rs78254232	T	C	T	C	-0.2108	0	0.9813	0.9858	FALSE	FALSE	FALSE	ieu-b-7	3	174384187	0.0993	468692	0.9999	Parkinson's disease || id:ieu-b-7	Parkinson's disease	Parkinson's disease || ||	TRUE	igd	NA	NA	NA	NA	NA	NA	NA	3	174384187	0.0456	3.79e-06	14248	Tumor necrosis factor ligand superfamily member 12 levels	TRUE	reported	GCST90274846	textfile	2	1	TRUE	0.00149764	21.3673
Tumor necrosis factor ligand superfamily member 12 levels	39	rs8116972	T	C	T	C	-0.0953	0.0017	0.0804	0.0893	FALSE	FALSE	FALSE	ieu-b-7	20	18299709	0.0302	482730	0.9541	Parkinson's disease || id:ieu-b-7	Parkinson's disease	Parkinson's disease || ||	TRUE	igd	NA	NA	NA	NA	NA	NA	NA	20	18299709	0.0211	6.28e-06	14733	Tumor necrosis factor ligand superfamily member 12 levels	TRUE	reported	GCST90274846	textfile	2	1	TRUE	0.0013827	20.3968
Tumor necrosis factor ligand superfamily member 12 levels	40	rs826688	A	T	A	T	-0.0592	0.0232	0.3965	0.4089	FALSE	TRUE	FALSE	ieu-b-7	2	109251651	0.0264	13655	0.379	Parkinson's disease || id:ieu-b-7	Parkinson's disease	Parkinson's disease || ||	TRUE	igd	TRUE	rs826688	rs826693	A	T	T	C	2	109239869	0.0125	2.18e-06	12835	Tumor necrosis factor ligand superfamily member 12 levels	TRUE	reported	GCST90274846	textfile	2	1	TRUE	0.00174449	22.4262
Tumor necrosis factor ligand superfamily member 12 levels	41	rs870526	T	C	T	C	-0.0508	0.0205	0.5377	0.5211	FALSE	FALSE	FALSE	ieu-b-7	2	20369562	0.0192	482730	0.2851	Parkinson's disease || id:ieu-b-7	Parkinson's disease	Parkinson's disease || ||	TRUE	igd	NA	NA	NA	NA	NA	NA	NA	2	20369562	0.0114	8.34e-06	14731	Tumor necrosis factor ligand superfamily member 12 levels	TRUE	reported	GCST90274846	textfile	2	1	TRUE	0.00134617	19.8545
Tumor necrosis factor ligand superfamily member 12 levels	42	rs9470247	A	G	A	G	-0.1026	-0.0868	0.9246	0.9216	FALSE	FALSE	FALSE	ieu-b-7	6	36262483	0.0359	482730	0.01573	Parkinson's disease || id:ieu-b-7	Parkinson's disease	Parkinson's disease || ||	TRUE	igd	NA	NA	NA	NA	NA	NA	NA	6	36262483	0.0232	9.76e-06	14288	Tumor necrosis factor ligand superfamily member 12 levels	TRUE	reported	GCST90274846	textfile	2	1	TRUE	0.00136695	19.555
Tumor necrosis factor ligand superfamily member 12 levels	43	rs9842051	C	G	C	G	0.1192	0.0226	0.748	0.7389	FALSE	TRUE	FALSE	ieu-b-7	3	143021856	0.027	468692	0.4014	Parkinson's disease || id:ieu-b-7	Parkinson's disease	Parkinson's disease || ||	TRUE	igd	NA	NA	NA	NA	NA	NA	NA	3	143021856	0.014	1.68e-17	14288	Tumor necrosis factor ligand superfamily member 12 levels	TRUE	reported	GCST90274846	textfile	2	1	TRUE	0.00504809	72.4829
CD40L receptor levels	1	rs1081489	A	G	A	G	-0.0789	0.0131	0.8552	0.8733	FALSE	FALSE	FALSE	ieu-b-7	10	84412569	0.0361	466555	0.717599	Parkinson's disease || id:ieu-b-7	Parkinson's disease	Parkinson's disease || ||	TRUE	igd	TRUE	rs1081489	rs604482	G	A	A	C	10	84407842	0.0176	7.36e-06	12196	CD40L receptor levels	TRUE	reported	GCST90274772	textfile	2	1	TRUE	0.00164511	20.0936
CD40L receptor levels	2	rs117191103	T	C	T	C	0.3553	0.096	0.0208	0.02	FALSE	FALSE	FALSE	ieu-b-7	20	44464356	0.0696	482730	0.1676	Parkinson's disease || id:ieu-b-7	Parkinson's disease	Parkinson's disease || ||	TRUE	igd	NA	NA	NA	NA	NA	NA	NA	20	44464356	0.0437	4.28e-16	14736	CD40L receptor levels	TRUE	reported	GCST90274772	textfile	2	1	TRUE	0.00446585	66.095
CD40L receptor levels	3	rs11755766	T	C	T	C	-0.0504	0.05	0.5049	0.5151	FALSE	FALSE	FALSE	ieu-b-7	6	10178951	0.0206	482730	0.01493	Parkinson's disease || id:ieu-b-7	Parkinson's disease	Parkinson's disease || ||	TRUE	igd	NA	NA	NA	NA	NA	NA	NA	6	10178951	0.0112	6.8e-06	14735	CD40L receptor levels	TRUE	reported	GCST90274772	textfile	2	1	TRUE	0.00137239	20.2473
CD40L receptor levels	4	rs12152184	A	G	A	G	0.1085	-0.0764	0.8849	0.8907	FALSE	FALSE	FALSE	ieu-b-7	22	45003427	0.0365	468692	0.0364897	Parkinson's disease || id:ieu-b-7	Parkinson's disease	Parkinson's disease || ||	TRUE	igd	TRUE	rs12152184	rs9614831	G	A	A	C	22	45002809	0.0205	1.21e-07	12402	CD40L receptor levels	TRUE	reported	GCST90274772	textfile	2	1	TRUE	0.00225362	28.008
CD40L receptor levels	5	rs12500563	T	G	T	G	0.3143	0.1578	0.9875	0.9824	FALSE	FALSE	FALSE	ieu-b-7	4	7304426	0.1337	11518	0.2378	Parkinson's disease || id:ieu-b-7	Parkinson's disease	Parkinson's disease || ||	TRUE	igd	NA	NA	NA	NA	NA	NA	NA	4	7304426	0.0687	4.76e-06	10795	CD40L receptor levels	TRUE	reported	GCST90274772	textfile	2	1	TRUE	0.00193514	20.9264
CD40L receptor levels	6	rs12624433	A	G	A	G	-0.4185	0.0355	0.2558	0.2652	FALSE	FALSE	FALSE	ieu-b-7	20	44680853	0.0203	482730	0.0804304	Parkinson's disease || id:ieu-b-7	Parkinson's disease	Parkinson's disease || ||	TRUE	igd	NA	NA	NA	NA	NA	NA	NA	20	44680853	0.0133	1e-200	14287	CD40L receptor levels	TRUE	reported	GCST90274772	textfile	2	1	TRUE	0.0648106	989.981
CD40L receptor levels	7	rs138739860	T	G	T	G	0.1632	-0.0303	0.9648	0.9651	FALSE	FALSE	FALSE	ieu-b-7	21	18106023	0.0646	468692	0.6384	Parkinson's disease || id:ieu-b-7	Parkinson's disease	Parkinson's disease || ||	TRUE	igd	TRUE	rs138739860	rs139659971	G	T	C	T	21	18103398	0.0351	3.33e-06	11979	CD40L receptor levels	TRUE	reported	GCST90274772	textfile	2	1	TRUE	0.00180145	21.6149
CD40L receptor levels	8	rs138897138	A	G	A	G	0.109	0.0148	0.914	0.9086	FALSE	FALSE	FALSE	ieu-b-7	2	122731427	0.0398	468692	0.7103	Parkinson's disease || id:ieu-b-7	Parkinson's disease	Parkinson's disease || ||	TRUE	igd	NA	NA	NA	NA	NA	NA	NA	2	122731427	0.0216	4.5e-07	14288	CD40L receptor levels	TRUE	reported	GCST90274772	textfile	2	1	TRUE	0.0017791	25.4615
CD40L receptor levels	9	rs141401004	C	G	C	G	-0.0662	0.0189	0.4415	0.4548	FALSE	TRUE	TRUE	ieu-b-7	5	22141602	0.0193	482730	0.3286	Parkinson's disease || id:ieu-b-7	Parkinson's disease	Parkinson's disease || ||	TRUE	igd	TRUE	rs141401004	rs2963653	C	G	C	T	5	22137911	0.0129	2.87e-07	12404	CD40L receptor levels	TRUE	reported	GCST90274772	textfile	2	1	FALSE	0.00211862	26.3309
CD40L receptor levels	10	rs144949926	A	G	A	G	-0.2655	-0.2443	0.9784	0.9891	FALSE	FALSE	FALSE	ieu-b-7	3	20921481	0.2327	11518	0.2937	Parkinson's disease || id:ieu-b-7	Parkinson's disease	Parkinson's disease || ||	TRUE	igd	NA	NA	NA	NA	NA	NA	NA	3	20921481	0.0591	7.04e-06	14288	CD40L receptor levels	TRUE	reported	GCST90274772	textfile	2	1	TRUE	0.00141049	20.1787
CD40L receptor levels	11	rs149900704	A	G	A	G	-0.1956	-0.067	0.0203	0.0143	FALSE	FALSE	FALSE	ieu-b-7	8	111799116	0.0965	468692	0.4876	Parkinson's disease || id:ieu-b-7	Parkinson's disease	Parkinson's disease || ||	TRUE	igd	NA	NA	NA	NA	NA	NA	NA	8	111799116	0.0442	9.63e-06	14732	CD40L receptor levels	TRUE	reported	GCST90274772	textfile	2	1	TRUE	0.00132756	19.581
CD40L receptor levels	12	rs17372980	T	C	T	C	-0.0611	0.0184	0.7421	0.7459	FALSE	FALSE	FALSE	ieu-b-7	1	59140291	0.0217	482730	0.3982	Parkinson's disease || id:ieu-b-7	Parkinson's disease	Parkinson's disease || ||	TRUE	igd	NA	NA	NA	NA	NA	NA	NA	1	59140291	0.0134	5.12e-06	14288	CD40L receptor levels	TRUE	reported	GCST90274772	textfile	2	1	TRUE	0.00145301	20.788
CD40L receptor levels	13	rs187640246	T	C	T	C	-0.2717	-0.0647	0.0134	0.0101	FALSE	FALSE	FALSE	ieu-b-7	20	30007295	0.1696	11518	0.7028	Parkinson's disease || id:ieu-b-7	Parkinson's disease	Parkinson's disease || ||	TRUE	igd	NA	NA	NA	NA	NA	NA	NA	20	30007295	0.0604	6.85e-06	12792	CD40L receptor levels	TRUE	reported	GCST90274772	textfile	2	1	TRUE	0.00157936	20.2319
CD40L receptor levels	14	rs34755276	A	G	A	G	0.0587	0.0356	0.3475	0.3374	FALSE	FALSE	FALSE	ieu-b-7	19	57758100	0.0189	482730	0.0602504	Parkinson's disease || id:ieu-b-7	Parkinson's disease	Parkinson's disease || ||	TRUE	igd	TRUE	rs34755276	rs12460117	A	G	T	C	19	57755822	0.0131	7.43e-06	12403	CD40L receptor levels	TRUE	reported	GCST90274772	textfile	2	1	TRUE	0.00161623	20.0754
CD40L receptor levels	15	rs35864161	T	G	T	G	-0.1269	0.0089	0.9543	0.9556	FALSE	FALSE	FALSE	ieu-b-7	17	66365155	0.0585	468692	0.8792	Parkinson's disease || id:ieu-b-7	Parkinson's disease	Parkinson's disease || ||	TRUE	igd	NA	NA	NA	NA	NA	NA	NA	17	66365155	0.0284	7.88e-06	14735	CD40L receptor levels	TRUE	reported	GCST90274772	textfile	2	1	TRUE	0.00135316	19.9631
CD40L receptor levels	16	rs3967170	A	G	A	G	0.0789	-0.0396	0.1353	0.1191	FALSE	FALSE	FALSE	ieu-b-7	3	3773438	0.0349	468692	0.2568	Parkinson's disease || id:ieu-b-7	Parkinson's disease	Parkinson's disease || ||	TRUE	igd	NA	NA	NA	NA	NA	NA	NA	3	3773438	0.017	3.46e-06	14721	CD40L receptor levels	TRUE	reported	GCST90274772	textfile	2	1	TRUE	0.00146111	21.5376
CD40L receptor levels	17	rs404842	A	G	A	G	-0.0599	0.003	0.6433	0.6676	FALSE	FALSE	FALSE	ieu-b-7	16	84304113	0.0239	468692	0.8993	Parkinson's disease || id:ieu-b-7	Parkinson's disease	Parkinson's disease || ||	TRUE	igd	NA	NA	NA	NA	NA	NA	NA	16	84304113	0.0123	1.12e-06	14287	CD40L receptor levels	TRUE	reported	GCST90274772	textfile	2	1	TRUE	0.00165723	23.7128
CD40L receptor levels	18	rs4278412	C	G	C	G	0.1978	-0.0374	0.0203	0.0241	FALSE	TRUE	FALSE	ieu-b-7	1	211450157	0.0746	468692	0.6162	Parkinson's disease || id:ieu-b-7	Parkinson's disease	Parkinson's disease || ||	TRUE	igd	NA	NA	NA	NA	NA	NA	NA	1	211450157	0.0413	1.67e-06	14725	CD40L receptor levels	TRUE	reported	GCST90274772	textfile	2	1	TRUE	0.00155533	22.9347
CD40L receptor levels	19	rs45456397	A	C	A	C	-0.1157	0.0129	0.0763	0.0781	FALSE	FALSE	FALSE	ieu-b-7	20	44981692	0.044	468692	0.768799	Parkinson's disease || id:ieu-b-7	Parkinson's disease	Parkinson's disease || ||	TRUE	igd	NA	NA	NA	NA	NA	NA	NA	20	44981692	0.023	4.89e-07	14288	CD40L receptor levels	TRUE	reported	GCST90274772	textfile	2	1	TRUE	0.00176795	25.3017
CD40L receptor levels	20	rs4664334	T	C	T	C	0.0541	0.0118	0.5003	0.5113	FALSE	FALSE	FALSE	ieu-b-7	2	161368905	0.022	27693	0.5924	Parkinson's disease || id:ieu-b-7	Parkinson's disease	Parkinson's disease || ||	TRUE	igd	NA	NA	NA	NA	NA	NA	NA	2	161368905	0.0118	4.55e-06	14288	CD40L receptor levels	TRUE	reported	GCST90274772	textfile	2	1	TRUE	0.001469	21.017
CD40L receptor levels	21	rs7250371	T	C	T	C	0.0686	-0.0106	0.3648	0.3712	FALSE	FALSE	FALSE	ieu-b-7	19	57861085	0.0179	482730	0.5536	Parkinson's disease || id:ieu-b-7	Parkinson's disease	Parkinson's disease || ||	TRUE	igd	NA	NA	NA	NA	NA	NA	NA	19	57861085	0.0116	3.34e-09	14722	CD40L receptor levels	TRUE	reported	GCST90274772	textfile	2	1	TRUE	0.00236993	34.9682
CD40L receptor levels	22	rs75626299	C	G	C	G	0.1458	0.1184	0.9638	0.9656	FALSE	TRUE	FALSE	ieu-b-7	9	29426599	0.0639	468692	0.0638999	Parkinson's disease || id:ieu-b-7	Parkinson's disease	Parkinson's disease || ||	TRUE	igd	NA	NA	NA	NA	NA	NA	NA	9	29426599	0.0316	3.95e-06	14728	CD40L receptor levels	TRUE	reported	GCST90274772	textfile	2	1	TRUE	0.00144334	21.2854
CD40L receptor levels	23	rs7798473	A	C	A	C	-0.1041	0.0083	0.0609	0.3367	FALSE	FALSE	FALSE	ieu-b-7	7	108543387	0.0366	482730	0.8209	Parkinson's disease || id:ieu-b-7	Parkinson's disease	Parkinson's disease || ||	TRUE	igd	NA	NA	NA	NA	NA	NA	NA	7	108543387	0.0235	9.43e-06	14734	CD40L receptor levels	TRUE	reported	GCST90274772	textfile	2	1	TRUE	0.00133005	19.6204
CD40L receptor levels	24	rs8024256	A	G	A	G	-0.0562	0.034	0.3092	0.2878	FALSE	FALSE	FALSE	ieu-b-7	15	26829521	0.0244	468692	0.1639	Parkinson's disease || id:ieu-b-7	Parkinson's disease	Parkinson's disease || ||	TRUE	igd	NA	NA	NA	NA	NA	NA	NA	15	26829521	0.0121	3.41e-06	14736	CD40L receptor levels	TRUE	reported	GCST90274772	textfile	2	1	TRUE	0.0014618	21.5696
CD40L receptor levels	25	rs9526031	A	C	A	C	0.064	0.0426	0.4882	0.4814	FALSE	FALSE	FALSE	ieu-b-7	13	45595067	0.0235	468692	0.0694896	Parkinson's disease || id:ieu-b-7	Parkinson's disease	Parkinson's disease || ||	TRUE	igd	NA	NA	NA	NA	NA	NA	NA	13	45595067	0.012	9.64e-08	14288	CD40L receptor levels	TRUE	reported	GCST90274772	textfile	2	1	TRUE	0.00198684	28.4405
C-X-C motif chemokine 9 levels	1	rs10008912	A	G	A	G	0.0586	0.0057	0.5255	0.5175	FALSE	FALSE	FALSE	ieu-b-7	4	7148069	0.0292	13655	0.8454	Parkinson's disease || id:ieu-b-7	Parkinson's disease	Parkinson's disease || ||	TRUE	igd	NA	NA	NA	NA	NA	NA	NA	4	7148069	0.0131	7.7e-06	14287	C-X-C motif chemokine 9 levels	TRUE	reported	GCST90274784	textfile	2	1	TRUE	0.00139863	20.0075
C-X-C motif chemokine 9 levels	2	rs10921271	A	G	A	G	0.0626	-0.0125	0.6904	0.66	FALSE	FALSE	FALSE	ieu-b-7	1	192805990	0.0241	468692	0.6036	Parkinson's disease || id:ieu-b-7	Parkinson's disease	Parkinson's disease || ||	TRUE	igd	TRUE	rs10921271	rs7534380	G	A	T	C	1	192799276	0.0138	5.73e-06	12404	C-X-C motif chemokine 9 levels	TRUE	reported	GCST90274784	textfile	2	1	TRUE	0.00165619	20.5741
C-X-C motif chemokine 9 levels	3	rs11130569	A	G	A	G	-0.051	0.0114	0.4547	0.4519	FALSE	FALSE	FALSE	ieu-b-7	3	57075894	0.0193	482730	0.5556	Parkinson's disease || id:ieu-b-7	Parkinson's disease	Parkinson's disease || ||	TRUE	igd	NA	NA	NA	NA	NA	NA	NA	3	57075894	0.0114	7.69e-06	14727	C-X-C motif chemokine 9 levels	TRUE	reported	GCST90274784	textfile	2	1	TRUE	0.00135715	20.0111
C-X-C motif chemokine 9 levels	4	rs113504136	T	G	T	G	-0.1494	0.0485	0.0325	0.0282	FALSE	FALSE	FALSE	ieu-b-7	10	13400390	0.0622	482730	0.4357	Parkinson's disease || id:ieu-b-7	Parkinson's disease	Parkinson's disease || ||	TRUE	igd	NA	NA	NA	NA	NA	NA	NA	10	13400390	0.0338	9.86e-06	14723	C-X-C motif chemokine 9 levels	TRUE	reported	GCST90274784	textfile	2	1	TRUE	0.00132524	19.5348
C-X-C motif chemokine 9 levels	5	rs114033894	T	G	T	G	-0.2245	0.0256	0.981	0.981	FALSE	FALSE	FALSE	ieu-b-7	2	86977227	0.0921	468692	0.7813	Parkinson's disease || id:ieu-b-7	Parkinson's disease	Parkinson's disease || ||	TRUE	igd	NA	NA	NA	NA	NA	NA	NA	2	86977227	0.0488	4.22e-06	14287	C-X-C motif chemokine 9 levels	TRUE	reported	GCST90274784	textfile	2	1	TRUE	0.00147914	21.1608
C-X-C motif chemokine 9 levels	6	rs118106660	A	G	A	G	0.259	0.0287	0.0138	0.0138	FALSE	FALSE	FALSE	ieu-b-7	14	54798313	0.1318	13655	0.8273	Parkinson's disease || id:ieu-b-7	Parkinson's disease	Parkinson's disease || ||	TRUE	igd	NA	NA	NA	NA	NA	NA	NA	14	54798313	0.0573	6.18e-06	13800	C-X-C motif chemokine 9 levels	TRUE	reported	GCST90274784	textfile	2	1	TRUE	0.00147832	20.4281
C-X-C motif chemokine 9 levels	7	rs12191307	A	G	A	G	-0.1452	0.0547	0.098	0.0997	FALSE	FALSE	FALSE	ieu-b-7	6	161256529	0.0347	482730	0.1143	Parkinson's disease || id:ieu-b-7	Parkinson's disease	Parkinson's disease || ||	TRUE	igd	NA	NA	NA	NA	NA	NA	NA	6	161256529	0.0197	1.7e-13	14287	C-X-C motif chemokine 9 levels	TRUE	reported	GCST90274784	textfile	2	1	TRUE	0.00378801	54.3175
C-X-C motif chemokine 9 levels	8	rs142119726	T	C	T	C	0.2705	-0.067	0.9851	0.9842	FALSE	FALSE	FALSE	ieu-b-7	7	48859798	0.1033	466555	0.5165	Parkinson's disease || id:ieu-b-7	Parkinson's disease	Parkinson's disease || ||	TRUE	igd	NA	NA	NA	NA	NA	NA	NA	7	48859798	0.0551	9.14e-07	13800	C-X-C motif chemokine 9 levels	TRUE	reported	GCST90274784	textfile	2	1	TRUE	0.00174339	24.0973
C-X-C motif chemokine 9 levels	9	rs145607633	T	C	T	C	0.0728	-0.0045	0.1625	0.1624	FALSE	FALSE	FALSE	ieu-b-7	5	19309903	0.0305	468692	0.8829	Parkinson's disease || id:ieu-b-7	Parkinson's disease	Parkinson's disease || ||	TRUE	igd	TRUE	rs145607633	rs7719998	T	C	A	C	5	19287867	0.0154	2.28e-06	14287	C-X-C motif chemokine 9 levels	TRUE	reported	GCST90274784	textfile	2	1	TRUE	0.00156171	22.344
C-X-C motif chemokine 9 levels	10	rs1758695	T	G	T	G	0.0511	-0.0137	0.5681	0.5844	FALSE	FALSE	FALSE	ieu-b-7	9	94165889	0.0248	468692	0.578599	Parkinson's disease || id:ieu-b-7	Parkinson's disease	Parkinson's disease || ||	TRUE	igd	NA	NA	NA	NA	NA	NA	NA	9	94165889	0.0115	8.85e-06	14732	C-X-C motif chemokine 9 levels	TRUE	reported	GCST90274784	textfile	2	1	TRUE	0.00133845	19.7418
C-X-C motif chemokine 9 levels	11	rs181816009	A	G	A	G	-0.1603	0.0386	0.0378	0.0401	FALSE	FALSE	FALSE	ieu-b-7	6	31428447	0.0477	480593	0.4176	Parkinson's disease || id:ieu-b-7	Parkinson's disease	Parkinson's disease || ||	TRUE	igd	TRUE	rs181816009	rs77004371	A	G	C	T	6	31423412	0.0342	2.77e-06	11985	C-X-C motif chemokine 9 levels	TRUE	reported	GCST90274784	textfile	2	1	TRUE	0.00182971	21.9656
C-X-C motif chemokine 9 levels	12	rs182152471	T	C	T	C	0.1861	-0.1279	0.028	0.0234	FALSE	FALSE	FALSE	ieu-b-7	16	1803589	0.0688	482730	0.0630507	Parkinson's disease || id:ieu-b-7	Parkinson's disease	Parkinson's disease || ||	TRUE	igd	NA	NA	NA	NA	NA	NA	NA	16	1803589	0.0385	1.34e-06	13667	C-X-C motif chemokine 9 levels	TRUE	reported	GCST90274784	textfile	2	1	TRUE	0.0017067	23.3619
C-X-C motif chemokine 9 levels	13	rs192119373	T	G	T	G	0.6177	0.1351	0.0057	0.0055	FALSE	FALSE	FALSE	ieu-b-7	1	3823464	0.3321	9431	0.684101	Parkinson's disease || id:ieu-b-7	Parkinson's disease	Parkinson's disease || ||	TRUE	igd	NA	NA	NA	NA	NA	NA	NA	1	3823464	0.1287	1.59e-06	8829	C-X-C motif chemokine 9 levels	TRUE	reported	GCST90274784	textfile	2	1	TRUE	0.00260229	23.0303
C-X-C motif chemokine 9 levels	14	rs192488790	T	C	T	C	0.2369	0.0264	0.0168	0.0141	FALSE	FALSE	FALSE	ieu-b-7	11	7767109	0.0924	481936	0.774901	Parkinson's disease || id:ieu-b-7	Parkinson's disease	Parkinson's disease || ||	TRUE	igd	NA	NA	NA	NA	NA	NA	NA	11	7767109	0.0532	8.47e-06	13421	C-X-C motif chemokine 9 levels	TRUE	reported	GCST90274784	textfile	2	1	TRUE	0.0014753	19.8263
C-X-C motif chemokine 9 levels	15	rs2535260	C	G	C	G	0.0642	-0.0123	0.8128	0.6778	FALSE	TRUE	FALSE	ieu-b-7	6	29628883	0.0223	480593	0.579201	Parkinson's disease || id:ieu-b-7	Parkinson's disease	Parkinson's disease || ||	TRUE	igd	NA	NA	NA	NA	NA	NA	NA	6	29628883	0.0144	8.26e-06	14735	C-X-C motif chemokine 9 levels	TRUE	reported	GCST90274784	textfile	2	1	TRUE	0.00134713	19.874
C-X-C motif chemokine 9 levels	16	rs3184504	T	C	T	C	0.1008	0.0046	0.4744	0.4854	FALSE	FALSE	FALSE	ieu-b-7	12	111884608	0.0167	482730	0.7826	Parkinson's disease || id:ieu-b-7	Parkinson's disease	Parkinson's disease || ||	TRUE	igd	NA	NA	NA	NA	NA	NA	NA	12	111884608	0.013	8.92e-15	11784	C-X-C motif chemokine 9 levels	TRUE	reported	GCST90274784	textfile	2	1	TRUE	0.00507612	60.1119
C-X-C motif chemokine 9 levels	17	rs35435997	A	G	A	G	0.0915	0.0587	0.1125	0.1112	FALSE	FALSE	FALSE	ieu-b-7	2	242665455	0.0383	27693	0.1257	Parkinson's disease || id:ieu-b-7	Parkinson's disease	Parkinson's disease || ||	TRUE	igd	NA	NA	NA	NA	NA	NA	NA	2	242665455	0.02	4.76e-06	12791	C-X-C motif chemokine 9 levels	TRUE	reported	GCST90274784	textfile	2	1	TRUE	0.00163368	20.9274
C-X-C motif chemokine 9 levels	18	rs368022534	A	G	A	G	0.1686	0.0247	0.9563	0.9561	FALSE	FALSE	FALSE	ieu-b-7	11	102628041	0.0468	482730	0.5977	Parkinson's disease || id:ieu-b-7	Parkinson's disease	Parkinson's disease || ||	TRUE	igd	TRUE	rs368022534	rs7925300	G	A	T	C	11	102612924	0.0371	5.51e-06	9256	C-X-C motif chemokine 9 levels	TRUE	reported	GCST90274784	textfile	2	1	TRUE	0.00222626	20.6478
C-X-C motif chemokine 9 levels	19	rs4241577	A	C	A	C	-0.1419	-0.0152	0.2629	0.2452	FALSE	FALSE	FALSE	ieu-b-7	4	76933445	0.0198	482730	0.4426	Parkinson's disease || id:ieu-b-7	Parkinson's disease	Parkinson's disease || ||	TRUE	igd	TRUE	rs4241577	rs10518143	A	C	G	A	4	76930776	0.0128	1.47e-28	14724	C-X-C motif chemokine 9 levels	TRUE	reported	GCST90274784	textfile	2	1	TRUE	0.00827769	122.881
C-X-C motif chemokine 9 levels	20	rs4888966	C	G	C	G	-0.157	0.0979	0.9683	0.9752	FALSE	TRUE	FALSE	ieu-b-7	16	79431853	0.0784	468692	0.2113	Parkinson's disease || id:ieu-b-7	Parkinson's disease	Parkinson's disease || ||	TRUE	igd	NA	NA	NA	NA	NA	NA	NA	16	79431853	0.0343	4.71e-06	14287	C-X-C motif chemokine 9 levels	TRUE	reported	GCST90274784	textfile	2	1	TRUE	0.00146431	20.9484
C-X-C motif chemokine 9 levels	21	rs58524610	T	G	T	G	0.223	-0.0252	0.0204	0.01	FALSE	FALSE	FALSE	ieu-b-7	12	11768143	0.1614	12046	0.8762	Parkinson's disease || id:ieu-b-7	Parkinson's disease	Parkinson's disease || ||	TRUE	igd	NA	NA	NA	NA	NA	NA	NA	12	11768143	0.0491	5.58e-06	14287	C-X-C motif chemokine 9 levels	TRUE	reported	GCST90274784	textfile	2	1	TRUE	0.00144171	20.6246
C-X-C motif chemokine 9 levels	22	rs61875680	A	G	A	G	-0.0758	5e-04	0.1611	0.1544	FALSE	FALSE	FALSE	ieu-b-7	10	107966626	0.0319	468692	0.9877	Parkinson's disease || id:ieu-b-7	Parkinson's disease	Parkinson's disease || ||	TRUE	igd	NA	NA	NA	NA	NA	NA	NA	10	107966626	0.0158	1.61e-06	14287	C-X-C motif chemokine 9 levels	TRUE	reported	GCST90274784	textfile	2	1	TRUE	0.00160836	23.0125
C-X-C motif chemokine 9 levels	23	rs62200304	A	C	A	C	-0.115	0.012	0.9336	0.9291	FALSE	FALSE	FALSE	ieu-b-7	20	20119931	0.0461	468692	0.7947	Parkinson's disease || id:ieu-b-7	Parkinson's disease	Parkinson's disease || ||	TRUE	igd	NA	NA	NA	NA	NA	NA	NA	20	20119931	0.0244	2.44e-06	14287	C-X-C motif chemokine 9 levels	TRUE	reported	GCST90274784	textfile	2	1	TRUE	0.00155239	22.2103
C-X-C motif chemokine 9 levels	24	rs62272916	A	G	A	G	-0.0834	0.0611	0.1182	0.1199	FALSE	FALSE	FALSE	ieu-b-7	3	151541803	0.0399	13655	0.1256	Parkinson's disease || id:ieu-b-7	Parkinson's disease	Parkinson's disease || ||	TRUE	igd	NA	NA	NA	NA	NA	NA	NA	3	151541803	0.0176	2.15e-06	14710	C-X-C motif chemokine 9 levels	TRUE	reported	GCST90274784	textfile	2	1	TRUE	0.00152416	22.4516
C-X-C motif chemokine 9 levels	25	rs6548432	A	G	A	G	-0.0514	-0.0003	0.4276	0.4435	FALSE	FALSE	FALSE	ieu-b-7	3	76525063	0.0225	468692	0.9898	Parkinson's disease || id:ieu-b-7	Parkinson's disease	Parkinson's disease || ||	TRUE	igd	NA	NA	NA	NA	NA	NA	NA	3	76525063	0.0114	6.52e-06	14724	C-X-C motif chemokine 9 levels	TRUE	reported	GCST90274784	textfile	2	1	TRUE	0.00137877	20.3263
C-X-C motif chemokine 9 levels	26	rs656739	A	G	A	G	0.0562	0.0173	0.6566	0.6682	FALSE	FALSE	FALSE	ieu-b-7	7	29049949	0.0188	482730	0.3573	Parkinson's disease || id:ieu-b-7	Parkinson's disease	Parkinson's disease || ||	TRUE	igd	NA	NA	NA	NA	NA	NA	NA	7	29049949	0.0119	2.33e-06	14735	C-X-C motif chemokine 9 levels	TRUE	reported	GCST90274784	textfile	2	1	TRUE	0.00151137	22.3008
C-X-C motif chemokine 9 levels	27	rs6586167	T	G	T	G	-0.052	0.0157	0.5056	0.5003	FALSE	FALSE	FALSE	ieu-b-7	10	90756146	0.018	482730	0.3837	Parkinson's disease || id:ieu-b-7	Parkinson's disease	Parkinson's disease || ||	TRUE	igd	NA	NA	NA	NA	NA	NA	NA	10	90756146	0.0114	5.08e-06	14735	C-X-C motif chemokine 9 levels	TRUE	reported	GCST90274784	textfile	2	1	TRUE	0.00141005	20.8036
C-X-C motif chemokine 9 levels	28	rs7149776	A	T	A	T	-0.0574	0.0176	0.5236	0.5448	FALSE	TRUE	TRUE	ieu-b-7	14	74739091	0.0186	482730	0.3424	Parkinson's disease || id:ieu-b-7	Parkinson's disease	Parkinson's disease || ||	TRUE	igd	NA	NA	NA	NA	NA	NA	NA	14	74739091	0.0115	6e-07	14286	C-X-C motif chemokine 9 levels	TRUE	reported	GCST90274784	textfile	2	1	FALSE	0.00174085	24.9096
C-X-C motif chemokine 9 levels	29	rs72991127	C	G	C	G	-0.0583	-0.0099	0.264	0.2557	FALSE	TRUE	FALSE	ieu-b-7	2	236906094	0.021	482730	0.636499	Parkinson's disease || id:ieu-b-7	Parkinson's disease	Parkinson's disease || ||	TRUE	igd	NA	NA	NA	NA	NA	NA	NA	2	236906094	0.0131	8.57e-06	14287	C-X-C motif chemokine 9 levels	TRUE	reported	GCST90274784	textfile	2	1	TRUE	0.00138437	19.8031
C-X-C motif chemokine 9 levels	30	rs73194812	A	G	A	G	0.1821	0.0368	0.9758	0.9749	FALSE	FALSE	FALSE	ieu-b-7	21	18734554	0.0749	468692	0.623499	Parkinson's disease || id:ieu-b-7	Parkinson's disease	Parkinson's disease || ||	TRUE	igd	NA	NA	NA	NA	NA	NA	NA	21	18734554	0.0391	3.2e-06	14730	C-X-C motif chemokine 9 levels	TRUE	reported	GCST90274784	textfile	2	1	TRUE	0.00147036	21.6874
C-X-C motif chemokine 9 levels	31	rs73367822	T	C	T	C	-0.0588	0.0084	0.5804	0.5888	FALSE	FALSE	FALSE	ieu-b-7	21	45026728	0.0185	482730	0.6494	Parkinson's disease || id:ieu-b-7	Parkinson's disease	Parkinson's disease || ||	TRUE	igd	TRUE	rs73367822	rs2838331	C	T	C	T	21	45024252	0.0126	3.06e-06	11760	C-X-C motif chemokine 9 levels	TRUE	reported	GCST90274784	textfile	2	1	TRUE	0.00184843	21.7741
C-X-C motif chemokine 9 levels	32	rs73606147	A	C	A	C	0.2792	-0.1743	0.0133	0.0102	FALSE	FALSE	FALSE	ieu-b-7	20	2538467	0.1349	25028	0.1965	Parkinson's disease || id:ieu-b-7	Parkinson's disease	Parkinson's disease || ||	TRUE	igd	NA	NA	NA	NA	NA	NA	NA	20	2538467	0.059	2.22e-06	13379	C-X-C motif chemokine 9 levels	TRUE	reported	GCST90274784	textfile	2	1	TRUE	0.001671	22.3904
C-X-C motif chemokine 9 levels	33	rs7429588	T	C	T	C	0.0592	0.0265	0.706	0.7226	FALSE	FALSE	FALSE	ieu-b-7	3	46835250	0.0249	27693	0.2867	Parkinson's disease || id:ieu-b-7	Parkinson's disease	Parkinson's disease || ||	TRUE	igd	NA	NA	NA	NA	NA	NA	NA	3	46835250	0.0134	9.97e-06	14285	C-X-C motif chemokine 9 levels	TRUE	reported	GCST90274784	textfile	2	1	TRUE	0.00136446	19.5152
C-X-C motif chemokine 9 levels	34	rs74956615	A	T	A	T	-0.1309	-0.0547	0.049	0.04	FALSE	TRUE	FALSE	ieu-b-7	19	10463118	0.0447	482730	0.2213	Parkinson's disease || id:ieu-b-7	Parkinson's disease	Parkinson's disease || ||	TRUE	igd	TRUE	rs74956615	rs34536443	A	T	C	G	19	10427721	0.0286	4.72e-06	13662	C-X-C motif chemokine 9 levels	TRUE	reported	GCST90274784	textfile	2	1	TRUE	0.00153097	20.9452
C-X-C motif chemokine 9 levels	35	rs75525140	C	G	C	G	-0.2062	0.123	0.9819	0.9849	FALSE	TRUE	FALSE	ieu-b-7	18	28624793	0.0956	471013	0.1986	Parkinson's disease || id:ieu-b-7	Parkinson's disease	Parkinson's disease || ||	TRUE	igd	NA	NA	NA	NA	NA	NA	NA	18	28624793	0.0465	9.23e-06	14725	C-X-C motif chemokine 9 levels	TRUE	reported	GCST90274784	textfile	2	1	TRUE	0.00133363	19.6613
C-X-C motif chemokine 9 levels	36	rs7600322	T	C	T	C	0.057	-0.0296	0.5214	0.4933	FALSE	FALSE	FALSE	ieu-b-7	2	204754353	0.0175	480593	0.0911801	Parkinson's disease || id:ieu-b-7	Parkinson's disease	Parkinson's disease || ||	TRUE	igd	NA	NA	NA	NA	NA	NA	NA	2	204754353	0.0118	1.36e-06	13849	C-X-C motif chemokine 9 levels	TRUE	reported	GCST90274784	textfile	2	1	TRUE	0.00168204	23.3304
C-X-C motif chemokine 9 levels	37	rs783149	A	C	A	C	-0.0805	-0.0137	0.1958	0.1593	FALSE	FALSE	FALSE	ieu-b-7	6	161088918	0.0232	482730	0.555699	Parkinson's disease || id:ieu-b-7	Parkinson's disease	Parkinson's disease || ||	TRUE	igd	NA	NA	NA	NA	NA	NA	NA	6	161088918	0.0144	2.27e-08	14287	C-X-C motif chemokine 9 levels	TRUE	reported	GCST90274784	textfile	2	1	TRUE	0.00218261	31.2468
C-X-C motif chemokine 9 levels	38	rs79551873	T	C	T	C	0.0533	0.0139	0.3563	0.3444	FALSE	FALSE	FALSE	ieu-b-7	2	231423737	0.0195	482730	0.4751	Parkinson's disease || id:ieu-b-7	Parkinson's disease	Parkinson's disease || ||	TRUE	igd	NA	NA	NA	NA	NA	NA	NA	2	231423737	0.0119	7.5e-06	14287	C-X-C motif chemokine 9 levels	TRUE	reported	GCST90274784	textfile	2	1	TRUE	0.0014022	20.0586
C-X-C motif chemokine 9 levels	39	rs80348644	T	C	T	C	0.1546	0.064	0.0336	0.0292	FALSE	FALSE	FALSE	ieu-b-7	4	160574480	0.0605	480409	0.2901	Parkinson's disease || id:ieu-b-7	Parkinson's disease	Parkinson's disease || ||	TRUE	igd	NA	NA	NA	NA	NA	NA	NA	4	160574480	0.0332	3.21e-06	14734	C-X-C motif chemokine 9 levels	TRUE	reported	GCST90274784	textfile	2	1	TRUE	0.00146955	21.6812
C-X-C motif chemokine 9 levels	40	rs9366778	A	G	A	G	-0.0605	-0.0052	0.4075	0.4144	FALSE	FALSE	FALSE	ieu-b-7	6	31269173	0.0189	480593	0.7815	Parkinson's disease || id:ieu-b-7	Parkinson's disease	Parkinson's disease || ||	TRUE	igd	NA	NA	NA	NA	NA	NA	NA	6	31269173	0.0115	1.43e-07	14735	C-X-C motif chemokine 9 levels	TRUE	reported	GCST90274784	textfile	2	1	TRUE	0.00187478	27.673
Leukemia inhibitory factor levels	1	rs10152968	A	G	A	G	0.0678	0.0126	0.7664	0.7751	FALSE	FALSE	FALSE	ieu-b-7	15	60604436	0.0267	468692	0.636999	Parkinson's disease || id:ieu-b-7	Parkinson's disease	Parkinson's disease || ||	TRUE	igd	NA	NA	NA	NA	NA	NA	NA	15	60604436	0.0153	9.36e-06	11792	Leukemia inhibitory factor levels	TRUE	reported	GCST90274819	textfile	2	1	TRUE	0.00166252	19.6337
Leukemia inhibitory factor levels	2	rs11608349	A	T	A	T	-0.3084	0.0305	0.0168	0.0132	FALSE	TRUE	FALSE	ieu-b-7	12	68026044	0.1163	468692	0.7931	Parkinson's disease || id:ieu-b-7	Parkinson's disease	Parkinson's disease || ||	TRUE	igd	NA	NA	NA	NA	NA	NA	NA	12	68026044	0.0661	3.08e-06	9362	Leukemia inhibitory factor levels	TRUE	reported	GCST90274819	textfile	2	1	TRUE	0.00231979	21.7637
Leukemia inhibitory factor levels	3	rs116794364	C	G	C	G	-0.3015	-0.0081	0.9851	0.9863	FALSE	TRUE	FALSE	ieu-b-7	2	224292526	0.1248	13655	0.948	Parkinson's disease || id:ieu-b-7	Parkinson's disease	Parkinson's disease || ||	TRUE	igd	NA	NA	NA	NA	NA	NA	NA	2	224292526	0.0631	1.77e-06	10858	Leukemia inhibitory factor levels	TRUE	reported	GCST90274819	textfile	2	1	TRUE	0.00209823	22.8263
Leukemia inhibitory factor levels	4	rs117675814	T	C	T	C	-0.2448	-0.0274	0.018	0.0128	FALSE	FALSE	FALSE	ieu-b-7	7	67523386	0.1134	468692	0.809	Parkinson's disease || id:ieu-b-7	Parkinson's disease	Parkinson's disease || ||	TRUE	igd	NA	NA	NA	NA	NA	NA	NA	7	67523386	0.0544	6.8e-06	11345	Leukemia inhibitory factor levels	TRUE	reported	GCST90274819	textfile	2	1	TRUE	0.00178175	20.2464
Leukemia inhibitory factor levels	5	rs117844161	A	G	A	G	0.1842	-0.0507	0.9695	0.9726	FALSE	FALSE	FALSE	ieu-b-7	13	88387973	0.0722	468692	0.4823	Parkinson's disease || id:ieu-b-7	Parkinson's disease	Parkinson's disease || ||	TRUE	igd	NA	NA	NA	NA	NA	NA	NA	13	88387973	0.0408	6.34e-06	11781	Leukemia inhibitory factor levels	TRUE	reported	GCST90274819	textfile	2	1	TRUE	0.00172713	20.3791
Leukemia inhibitory factor levels	6	rs11883375	A	G	A	G	-0.1011	0.055	0.1385	0.1467	FALSE	FALSE	FALSE	ieu-b-7	19	54851842	0.0339	468692	0.1046	Parkinson's disease || id:ieu-b-7	Parkinson's disease	Parkinson's disease || ||	TRUE	igd	NA	NA	NA	NA	NA	NA	NA	19	54851842	0.0197	2.87e-07	11776	Leukemia inhibitory factor levels	TRUE	reported	GCST90274819	textfile	2	1	TRUE	0.00223153	26.3327
Leukemia inhibitory factor levels	7	rs12595568	T	G	T	G	-0.0652	0.0147	0.2544	0.2474	FALSE	FALSE	FALSE	ieu-b-7	15	38990803	0.0258	468692	0.569101	Parkinson's disease || id:ieu-b-7	Parkinson's disease	Parkinson's disease || ||	TRUE	igd	NA	NA	NA	NA	NA	NA	NA	15	38990803	0.0146	7.98e-06	11792	Leukemia inhibitory factor levels	TRUE	reported	GCST90274819	textfile	2	1	TRUE	0.00168837	19.9396
Leukemia inhibitory factor levels	8	rs13105239	A	C	A	C	0.0575	0.0077	0.5333	0.5018	FALSE	FALSE	FALSE	ieu-b-7	4	23472007	0.0223	468692	0.729699	Parkinson's disease || id:ieu-b-7	Parkinson's disease	Parkinson's disease || ||	TRUE	igd	NA	NA	NA	NA	NA	NA	NA	4	23472007	0.013	9.73e-06	11766	Leukemia inhibitory factor levels	TRUE	reported	GCST90274819	textfile	2	1	TRUE	0.00165996	19.5603
Leukemia inhibitory factor levels	9	rs1348602	T	G	T	G	-0.0782	-0.0402	0.2297	0.2222	FALSE	FALSE	FALSE	ieu-b-7	13	35731964	0.0269	468692	0.1347	Parkinson's disease || id:ieu-b-7	Parkinson's disease	Parkinson's disease || ||	TRUE	igd	TRUE	rs1348602	rs589524	T	G	T	C	13	35704767	0.0173	6.18e-06	9023	Leukemia inhibitory factor levels	TRUE	reported	GCST90274819	textfile	2	1	TRUE	0.00225937	20.428
Leukemia inhibitory factor levels	10	rs142330159	A	T	A	T	0.1155	0.0837	0.0986	0.0958	FALSE	TRUE	FALSE	ieu-b-7	5	171521141	0.0379	468692	0.0270097	Parkinson's disease || id:ieu-b-7	Parkinson's disease	Parkinson's disease || ||	TRUE	igd	TRUE	rs142330159	rs77586605	A	T	G	A	5	171514639	0.0258	7.58e-06	9436	Leukemia inhibitory factor levels	TRUE	reported	GCST90274819	textfile	2	1	TRUE	0.00211941	20.037
Leukemia inhibitory factor levels	11	rs145344087	C	G	C	G	0.2548	-0.0016	0.021	0.0187	FALSE	TRUE	FALSE	ieu-b-7	3	58954742	0.0967	468692	0.9871	Parkinson's disease || id:ieu-b-7	Parkinson's disease	Parkinson's disease || ||	TRUE	igd	NA	NA	NA	NA	NA	NA	NA	3	58954742	0.0556	4.59e-06	10281	Leukemia inhibitory factor levels	TRUE	reported	GCST90274819	textfile	2	1	TRUE	0.00203858	20.9974
Leukemia inhibitory factor levels	12	rs147461732	A	G	A	G	0.2606	-0.0392	0.0179	0.0145	FALSE	FALSE	FALSE	ieu-b-7	15	80114266	0.0966	468692	0.6846	Parkinson's disease || id:ieu-b-7	Parkinson's disease	Parkinson's disease || ||	TRUE	igd	NA	NA	NA	NA	NA	NA	NA	15	80114266	0.0583	7.82e-06	11345	Leukemia inhibitory factor levels	TRUE	reported	GCST90274819	textfile	2	1	TRUE	0.0017581	19.9772
Leukemia inhibitory factor levels	13	rs150843753	T	G	T	G	0.1742	-0.0263	0.9676	0.9685	FALSE	FALSE	FALSE	ieu-b-7	16	78805709	0.0769	13655	0.732501	Parkinson's disease || id:ieu-b-7	Parkinson's disease	Parkinson's disease || ||	TRUE	igd	NA	NA	NA	NA	NA	NA	NA	16	78805709	0.0385	6.05e-06	11779	Leukemia inhibitory factor levels	TRUE	reported	GCST90274819	textfile	2	1	TRUE	0.00173505	20.4692
Leukemia inhibitory factor levels	14	rs150843753	T	G	T	G	0.1742	-0.0263	0.9676	0.9685	FALSE	FALSE	FALSE	ieu-b-7	16	78805709	0.0769	13655	0.732501	Parkinson's disease || id:ieu-b-7	Parkinson's disease	Parkinson's disease || ||	TRUE	igd	NA	NA	NA	NA	NA	NA	NA	16	78805709	0.0385	6.05e-06	11779	Leukemia inhibitory factor levels	TRUE	reported	GCST90274819	textfile	2	2	TRUE	0.00173505	20.4692
Leukemia inhibitory factor levels	15	rs1534627	T	C	T	C	0.06	0.0036	0.5978	0.5934	FALSE	FALSE	FALSE	ieu-b-7	10	13969539	0.0228	468692	0.8751	Parkinson's disease || id:ieu-b-7	Parkinson's disease	Parkinson's disease || ||	TRUE	igd	NA	NA	NA	NA	NA	NA	NA	10	13969539	0.0132	5.48e-06	11791	Leukemia inhibitory factor levels	TRUE	reported	GCST90274819	textfile	2	1	TRUE	0.00174922	20.6577
Leukemia inhibitory factor levels	16	rs190222173	A	C	A	C	-0.3456	-0.0363	0.9882	0.9912	FALSE	FALSE	FALSE	ieu-b-7	3	121028150	0.1501	25556	0.809	Parkinson's disease || id:ieu-b-7	Parkinson's disease	Parkinson's disease || ||	TRUE	igd	NA	NA	NA	NA	NA	NA	NA	3	121028150	0.0781	9.64e-06	9984	Leukemia inhibitory factor levels	TRUE	reported	GCST90274819	textfile	2	1	TRUE	0.00195745	19.5776
Leukemia inhibitory factor levels	17	rs234592	A	G	A	G	-0.0635	-0.0356	0.5456	0.5333	FALSE	FALSE	FALSE	ieu-b-7	14	97087097	0.0226	468692	0.1158	Parkinson's disease || id:ieu-b-7	Parkinson's disease	Parkinson's disease || ||	TRUE	igd	NA	NA	NA	NA	NA	NA	NA	14	97087097	0.0136	3.02e-06	11345	Leukemia inhibitory factor levels	TRUE	reported	GCST90274819	textfile	2	1	TRUE	0.00191792	21.7968
Leukemia inhibitory factor levels	18	rs332426	A	G	A	G	0.112	0.0789	0.0899	0.1097	FALSE	FALSE	FALSE	ieu-b-7	19	6801966	0.0374	468692	0.0346601	Parkinson's disease || id:ieu-b-7	Parkinson's disease	Parkinson's disease || ||	TRUE	igd	NA	NA	NA	NA	NA	NA	NA	19	6801966	0.0238	2.53e-06	11789	Leukemia inhibitory factor levels	TRUE	reported	GCST90274819	textfile	2	1	TRUE	0.00187495	22.1416
Leukemia inhibitory factor levels	19	rs4326609	A	T	A	T	-0.0707	-0.0357	0.7435	0.7396	FALSE	TRUE	FALSE	ieu-b-7	1	244347370	0.0258	468692	0.1674	Parkinson's disease || id:ieu-b-7	Parkinson's disease	Parkinson's disease || ||	TRUE	igd	NA	NA	NA	NA	NA	NA	NA	1	244347370	0.0155	5.08e-06	11345	Leukemia inhibitory factor levels	TRUE	reported	GCST90274819	textfile	2	1	TRUE	0.00183052	20.8017
Leukemia inhibitory factor levels	20	rs4699986	T	G	T	G	0.0629	0.021	0.6927	0.6768	FALSE	FALSE	FALSE	ieu-b-7	5	61150440	0.0183	482730	0.251	Parkinson's disease || id:ieu-b-7	Parkinson's disease	Parkinson's disease || ||	TRUE	igd	NA	NA	NA	NA	NA	NA	NA	5	61150440	0.0139	6.03e-06	11792	Leukemia inhibitory factor levels	TRUE	reported	GCST90274819	textfile	2	1	TRUE	0.00173353	20.4738
Leukemia inhibitory factor levels	21	rs62213023	T	C	T	C	-0.1676	-0.0292	0.0399	0.0351	FALSE	FALSE	FALSE	ieu-b-7	21	43995327	0.0646	468692	0.6514	Parkinson's disease || id:ieu-b-7	Parkinson's disease	Parkinson's disease || ||	TRUE	igd	NA	NA	NA	NA	NA	NA	NA	21	43995327	0.0374	7.42e-06	11345	Leukemia inhibitory factor levels	TRUE	reported	GCST90274819	textfile	2	1	TRUE	0.00176698	20.0784
Leukemia inhibitory factor levels	22	rs7225483	T	G	T	G	0.0671	0.021	0.486	0.492	FALSE	FALSE	FALSE	ieu-b-7	17	28341679	0.0168	482730	0.2125	Parkinson's disease || id:ieu-b-7	Parkinson's disease	Parkinson's disease || ||	TRUE	igd	NA	NA	NA	NA	NA	NA	NA	17	28341679	0.0143	2.7e-06	9849	Leukemia inhibitory factor levels	TRUE	reported	GCST90274819	textfile	2	1	TRUE	0.00223055	22.0133
Leukemia inhibitory factor levels	23	rs74992559	A	G	A	G	0.1725	-0.0375	0.0351	0.034	FALSE	FALSE	FALSE	ieu-b-7	10	31490202	0.0642	468692	0.559899	Parkinson's disease || id:ieu-b-7	Parkinson's disease	Parkinson's disease || ||	TRUE	igd	NA	NA	NA	NA	NA	NA	NA	10	31490202	0.0367	2.6e-06	11784	Leukemia inhibitory factor levels	TRUE	reported	GCST90274819	textfile	2	1	TRUE	0.00187128	22.0888
Leukemia inhibitory factor levels	24	rs80092539	A	T	A	T	0.0993	0.0547	0.8758	0.8643	FALSE	TRUE	FALSE	ieu-b-7	2	46125903	0.0337	468692	0.1047	Parkinson's disease || id:ieu-b-7	Parkinson's disease	Parkinson's disease || ||	TRUE	igd	NA	NA	NA	NA	NA	NA	NA	2	46125903	0.0213	3.13e-06	11345	Leukemia inhibitory factor levels	TRUE	reported	GCST90274819	textfile	2	1	TRUE	0.00191207	21.7301
Leukemia inhibitory factor levels	25	rs825264	A	G	A	G	-0.2119	-0.0001	0.0321	0.023	FALSE	FALSE	FALSE	ieu-b-7	2	222585468	0.0646	482730	0.9982	Parkinson's disease || id:ieu-b-7	Parkinson's disease	Parkinson's disease || ||	TRUE	igd	NA	NA	NA	NA	NA	NA	NA	2	222585468	0.0453	2.9e-06	10291	Leukemia inhibitory factor levels	TRUE	reported	GCST90274819	textfile	2	1	TRUE	0.00212171	21.8767
Leukemia inhibitory factor levels	26	rs9482537	C	G	C	G	0.1084	0.0449	0.9095	0.9116	FALSE	TRUE	FALSE	ieu-b-7	6	124651086	0.0329	482730	0.1726	Parkinson's disease || id:ieu-b-7	Parkinson's disease	Parkinson's disease || ||	TRUE	igd	NA	NA	NA	NA	NA	NA	NA	6	124651086	0.0243	8.16e-06	11345	Leukemia inhibitory factor levels	TRUE	reported	GCST90274819	textfile	2	1	TRUE	0.00175098	19.8962
Leukemia inhibitory factor levels	27	rs9648464	T	C	T	C	0.0606	-0.0075	0.4384	0.4346	FALSE	FALSE	FALSE	ieu-b-7	7	4467714	0.0229	468692	0.7438	Parkinson's disease || id:ieu-b-7	Parkinson's disease	Parkinson's disease || ||	TRUE	igd	NA	NA	NA	NA	NA	NA	NA	7	4467714	0.0135	7.16e-06	11345	Leukemia inhibitory factor levels	TRUE	reported	GCST90274819	textfile	2	1	TRUE	0.00177297	20.1466
Interleukin-2 levels	1	rs10996419	T	C	T	C	-0.1222	-0.0101	0.9188	0.9371	FALSE	FALSE	FALSE	ieu-b-7	10	67202938	0.0468	468692	0.8292	Parkinson's disease || id:ieu-b-7	Parkinson's disease	Parkinson's disease || ||	TRUE	igd	NA	NA	NA	NA	NA	NA	NA	10	67202938	0.0259	2.38e-06	11784	Interleukin-2 levels	TRUE	reported	GCST90274806	textfile	2	1	TRUE	0.00188552	22.2571
Interleukin-2 levels	2	rs111783480	A	G	A	G	-0.1462	0.0643	0.1075	0.0166	FALSE	FALSE	FALSE	ieu-b-7	4	14802297	0.0937	468692	0.4928	Parkinson's disease || id:ieu-b-7	Parkinson's disease	Parkinson's disease || ||	TRUE	igd	TRUE	rs111783480	rs150533267	A	G	C	G	4	14756774	0.0329	8.84e-06	9265	Interleukin-2 levels	TRUE	reported	GCST90274806	textfile	2	1	TRUE	0.00212683	19.7428
Interleukin-2 levels	3	rs142641125	T	C	T	C	0.2095	0.0019	0.0287	0.0223	FALSE	FALSE	FALSE	ieu-b-7	3	12396234	0.0776	468692	0.9807	Parkinson's disease || id:ieu-b-7	Parkinson's disease	Parkinson's disease || ||	TRUE	igd	NA	NA	NA	NA	NA	NA	NA	3	12396234	0.0419	5.73e-07	11789	Interleukin-2 levels	TRUE	reported	GCST90274806	textfile	2	1	TRUE	0.00211613	24.9958
Interleukin-2 levels	4	rs144129701	C	G	C	G	-0.2699	-0.1624	0.9727	0.9846	FALSE	TRUE	FALSE	ieu-b-7	14	55563894	0.1315	13655	0.2171	Parkinson's disease || id:ieu-b-7	Parkinson's disease	Parkinson's disease || ||	TRUE	igd	NA	NA	NA	NA	NA	NA	NA	14	55563894	0.0576	2.79e-06	11341	Interleukin-2 levels	TRUE	reported	GCST90274806	textfile	2	1	TRUE	0.00193228	21.9525
Interleukin-2 levels	5	rs144129701	C	G	C	G	-0.2699	-0.1624	0.9727	0.9846	FALSE	TRUE	FALSE	ieu-b-7	14	55563894	0.1315	13655	0.2171	Parkinson's disease || id:ieu-b-7	Parkinson's disease	Parkinson's disease || ||	TRUE	igd	NA	NA	NA	NA	NA	NA	NA	14	55563894	0.0576	2.79e-06	11341	Interleukin-2 levels	TRUE	reported	GCST90274806	textfile	2	2	TRUE	0.00193228	21.9525
Interleukin-2 levels	6	rs1657222	A	G	A	G	-0.0621	0.0466	0.4037	0.3923	FALSE	FALSE	FALSE	ieu-b-7	10	34850203	0.0201	482730	0.0206101	Parkinson's disease || id:ieu-b-7	Parkinson's disease	Parkinson's disease || ||	TRUE	igd	TRUE	rs1657222	rs10827381	A	G	G	A	10	34837139	0.0137	5.82e-06	11340	Interleukin-2 levels	TRUE	reported	GCST90274806	textfile	2	1	TRUE	0.0018086	20.5431
Interleukin-2 levels	7	rs1671226	C	G	C	G	-0.0849	-0.0327	0.2053	0.2114	FALSE	TRUE	FALSE	ieu-b-7	19	55502846	0.0239	480593	0.1723	Parkinson's disease || id:ieu-b-7	Parkinson's disease	Parkinson's disease || ||	TRUE	igd	NA	NA	NA	NA	NA	NA	NA	19	55502846	0.017	5.91e-07	11341	Interleukin-2 levels	TRUE	reported	GCST90274806	textfile	2	1	TRUE	0.00219438	24.9368
Interleukin-2 levels	8	rs1943222	A	G	A	G	-0.0622	-0.0058	0.6878	0.6857	FALSE	FALSE	FALSE	ieu-b-7	18	58028057	0.0238	468692	0.8066	Parkinson's disease || id:ieu-b-7	Parkinson's disease	Parkinson's disease || ||	TRUE	igd	NA	NA	NA	NA	NA	NA	NA	18	58028057	0.0138	6.57e-06	11789	Interleukin-2 levels	TRUE	reported	GCST90274806	textfile	2	1	TRUE	0.00172028	20.3118
Interleukin-2 levels	9	rs201229721	A	C	A	C	-0.1468	0.0554	0.9396	0.9493	FALSE	FALSE	FALSE	ieu-b-7	9	88783762	0.0519	468692	0.2861	Parkinson's disease || id:ieu-b-7	Parkinson's disease	Parkinson's disease || ||	TRUE	igd	TRUE	rs201229721	rs7031615	C	A	G	A	9	88775115	0.0309	2.03e-06	9257	Interleukin-2 levels	TRUE	reported	GCST90274806	textfile	2	1	TRUE	0.00243224	22.5653
Interleukin-2 levels	10	rs28515912	A	C	A	C	-0.0723	-0.0303	0.6969	0.6963	FALSE	FALSE	FALSE	ieu-b-7	17	103299	0.0271	466555	0.2631	Parkinson's disease || id:ieu-b-7	Parkinson's disease	Parkinson's disease || ||	TRUE	igd	NA	NA	NA	NA	NA	NA	NA	17	103299	0.0149	1.22e-06	10723	Interleukin-2 levels	TRUE	reported	GCST90274806	textfile	2	1	TRUE	0.00219096	23.5409
Interleukin-2 levels	11	rs35769057	C	G	C	G	-0.0607	-0.0024	0.4509	0.44	FALSE	TRUE	TRUE	ieu-b-7	19	54594274	0.0242	467554	0.9201	Parkinson's disease || id:ieu-b-7	Parkinson's disease	Parkinson's disease || ||	TRUE	igd	NA	NA	NA	NA	NA	NA	NA	19	54594274	0.0136	8.07e-06	11341	Interleukin-2 levels	TRUE	reported	GCST90274806	textfile	2	1	FALSE	0.00175342	19.917
Interleukin-2 levels	12	rs36006983	T	C	T	C	-0.0728	0.0217	0.7384	0.7344	FALSE	FALSE	FALSE	ieu-b-7	16	77431739	0.0254	468692	0.3935	Parkinson's disease || id:ieu-b-7	Parkinson's disease	Parkinson's disease || ||	TRUE	igd	NA	NA	NA	NA	NA	NA	NA	16	77431739	0.0153	1.95e-06	11341	Interleukin-2 levels	TRUE	reported	GCST90274806	textfile	2	1	TRUE	0.00199234	22.6362
Interleukin-2 levels	13	rs4703508	T	C	T	C	-0.1216	-0.0609	0.9334	0.9287	FALSE	FALSE	FALSE	ieu-b-7	5	35188802	0.0447	468692	0.1727	Parkinson's disease || id:ieu-b-7	Parkinson's disease	Parkinson's disease || ||	TRUE	igd	NA	NA	NA	NA	NA	NA	NA	5	35188802	0.026	2.91e-06	11789	Interleukin-2 levels	TRUE	reported	GCST90274806	textfile	2	1	TRUE	0.00185199	21.8699
Interleukin-2 levels	14	rs6535212	T	G	T	G	-0.0646	0.0429	0.6861	0.6864	FALSE	FALSE	FALSE	ieu-b-7	4	138235156	0.0248	468692	0.0838706	Parkinson's disease || id:ieu-b-7	Parkinson's disease	Parkinson's disease || ||	TRUE	igd	NA	NA	NA	NA	NA	NA	NA	4	138235156	0.0139	3.36e-06	11784	Interleukin-2 levels	TRUE	reported	GCST90274806	textfile	2	1	TRUE	0.00182956	21.5954
Interleukin-2 levels	15	rs72659067	A	G	A	G	0.3327	0.1763	0.0111	0.0106	FALSE	FALSE	FALSE	ieu-b-7	8	62639773	0.1701	11518	0.3001	Parkinson's disease || id:ieu-b-7	Parkinson's disease	Parkinson's disease || ||	TRUE	igd	NA	NA	NA	NA	NA	NA	NA	8	62639773	0.0736	6.17e-06	9980	Interleukin-2 levels	TRUE	reported	GCST90274806	textfile	2	1	TRUE	0.0020433	20.4297
Interleukin-2 levels	16	rs74852566	T	G	T	G	-0.1999	0.0146	0.0244	0.0197	FALSE	FALSE	FALSE	ieu-b-7	10	2293803	0.0716	482730	0.8381	Parkinson's disease || id:ieu-b-7	Parkinson's disease	Parkinson's disease || ||	TRUE	igd	NA	NA	NA	NA	NA	NA	NA	10	2293803	0.0431	3.52e-06	11789	Interleukin-2 levels	TRUE	reported	GCST90274806	textfile	2	1	TRUE	0.00182139	21.5079
Interleukin-2 levels	17	rs75739108	T	C	T	C	0.1737	-0.0086	0.039	0.0324	FALSE	FALSE	FALSE	ieu-b-7	3	137247468	0.0725	468692	0.906	Parkinson's disease || id:ieu-b-7	Parkinson's disease	Parkinson's disease || ||	TRUE	igd	NA	NA	NA	NA	NA	NA	NA	3	137247468	0.038	4.85e-06	11341	Interleukin-2 levels	TRUE	reported	GCST90274806	textfile	2	1	TRUE	0.001839	20.8908
Interleukin-2 levels	18	rs7638939	A	T	A	T	0.0854	-0.0045	0.8293	0.8279	FALSE	TRUE	FALSE	ieu-b-7	3	125991040	0.0253	482730	0.8598	Parkinson's disease || id:ieu-b-7	Parkinson's disease	Parkinson's disease || ||	TRUE	igd	NA	NA	NA	NA	NA	NA	NA	3	125991040	0.0174	9.2e-07	11769	Interleukin-2 levels	TRUE	reported	GCST90274806	textfile	2	1	TRUE	0.00204263	24.0848
Interleukin-2 levels	19	rs77832761	A	G	A	G	0.1922	0.0423	0.0318	0.0264	FALSE	FALSE	FALSE	ieu-b-7	13	85868678	0.0718	468692	0.555801	Parkinson's disease || id:ieu-b-7	Parkinson's disease	Parkinson's disease || ||	TRUE	igd	NA	NA	NA	NA	NA	NA	NA	13	85868678	0.0414	3.44e-06	11785	Interleukin-2 levels	TRUE	reported	GCST90274806	textfile	2	1	TRUE	0.0018255	21.5493
Interleukin-2 levels	20	rs77853517	T	C	T	C	-0.1048	0.0051	0.8961	0.9045	FALSE	FALSE	FALSE	ieu-b-7	3	64865615	0.0381	471013	0.8928	Parkinson's disease || id:ieu-b-7	Parkinson's disease	Parkinson's disease || ||	TRUE	igd	NA	NA	NA	NA	NA	NA	NA	3	64865615	0.0217	1.37e-06	11787	Interleukin-2 levels	TRUE	reported	GCST90274806	textfile	2	1	TRUE	0.00197488	23.32
Interleukin-2 levels	21	rs77880908	T	C	T	C	-0.0886	-0.0592	0.1258	0.1021	FALSE	FALSE	FALSE	ieu-b-7	4	47700645	0.0297	482730	0.0462999	Parkinson's disease || id:ieu-b-7	Parkinson's disease	Parkinson's disease || ||	TRUE	igd	NA	NA	NA	NA	NA	NA	NA	4	47700645	0.0196	6.17e-06	11770	Interleukin-2 levels	TRUE	reported	GCST90274806	textfile	2	1	TRUE	0.00173311	20.4306
Interleukin-2 levels	22	rs79419497	A	G	A	G	0.2016	-0.0482	0.9733	0.9722	FALSE	FALSE	FALSE	ieu-b-7	2	192579384	0.0691	468692	0.4848	Parkinson's disease || id:ieu-b-7	Parkinson's disease	Parkinson's disease || ||	TRUE	igd	NA	NA	NA	NA	NA	NA	NA	2	192579384	0.0424	1.99e-06	11789	Interleukin-2 levels	TRUE	reported	GCST90274806	textfile	2	1	TRUE	0.00191399	22.6035
Interleukin-2 levels	23	rs79925007	T	G	T	G	0.1176	-0.0306	0.9036	0.9014	FALSE	FALSE	FALSE	ieu-b-7	4	34713434	0.0495	466555	0.5363	Parkinson's disease || id:ieu-b-7	Parkinson's disease	Parkinson's disease || ||	TRUE	igd	NA	NA	NA	NA	NA	NA	NA	4	34713434	0.0255	3.99e-06	11341	Interleukin-2 levels	TRUE	reported	GCST90274806	textfile	2	1	TRUE	0.00187184	21.2646
Interleukin-33 levels	1	rs1013434	T	C	T	C	-0.0732	-0.0053	0.2201	0.2034	FALSE	FALSE	FALSE	ieu-b-7	21	40484010	0.03	468692	0.8585	Parkinson's disease || id:ieu-b-7	Parkinson's disease	Parkinson's disease || ||	TRUE	igd	NA	NA	NA	NA	NA	NA	NA	21	40484010	0.0158	3.61e-06	11783	Interleukin-33 levels	TRUE	reported	GCST90274812	textfile	2	1	TRUE	0.00181828	21.4602
Interleukin-33 levels	2	rs10415966	A	C	A	C	-0.1184	0.005	0.1177	0.1098	FALSE	FALSE	FALSE	ieu-b-7	19	14299739	0.0402	468692	0.9014	Parkinson's disease || id:ieu-b-7	Parkinson's disease	Parkinson's disease || ||	TRUE	igd	NA	NA	NA	NA	NA	NA	NA	19	14299739	0.0233	3.74e-07	10281	Interleukin-33 levels	TRUE	reported	GCST90274812	textfile	2	1	TRUE	0.00250534	25.8171
Interleukin-33 levels	3	rs10941408	T	C	T	C	-0.0666	0.0419	0.2923	0.2996	FALSE	FALSE	FALSE	ieu-b-7	5	38789263	0.0242	468692	0.0841492	Parkinson's disease || id:ieu-b-7	Parkinson's disease	Parkinson's disease || ||	TRUE	igd	TRUE	rs10941408	rs34836414	T	C	G	A	5	38788544	0.0148	6.8e-06	11345	Interleukin-33 levels	TRUE	reported	GCST90274812	textfile	2	1	TRUE	0.00178175	20.2464
Interleukin-33 levels	4	rs10944013	T	G	T	G	0.174	-0.013	0.9427	0.9765	FALSE	FALSE	FALSE	ieu-b-7	6	85297046	0.0725	468692	0.8574	Parkinson's disease || id:ieu-b-7	Parkinson's disease	Parkinson's disease || ||	TRUE	igd	TRUE	rs10944013	rs6922668	G	T	G	T	6	85296041	0.0389	7.71e-06	9257	Interleukin-33 levels	TRUE	reported	GCST90274812	textfile	2	1	TRUE	0.00215671	20.0035
Interleukin-33 levels	5	rs12453636	A	G	A	G	-0.1028	0.0563	0.1006	0.0937	FALSE	FALSE	FALSE	ieu-b-7	17	64288637	0.0294	482730	0.0552701	Parkinson's disease || id:ieu-b-7	Parkinson's disease	Parkinson's disease || ||	TRUE	igd	TRUE	rs12453636	rs12948922	A	G	A	G	17	64288475	0.0231	8.58e-06	9892	Interleukin-33 levels	TRUE	reported	GCST90274812	textfile	2	1	TRUE	0.00199806	19.8004
Interleukin-33 levels	6	rs1273797	A	G	A	G	-0.0652	-0.0018	0.4698	0.4817	FALSE	FALSE	FALSE	ieu-b-7	2	227451580	0.0228	468692	0.9379	Parkinson's disease || id:ieu-b-7	Parkinson's disease	Parkinson's disease || ||	TRUE	igd	TRUE	rs1273797	rs1273804	A	G	T	C	2	227438887	0.0144	5.96e-06	9252	Interleukin-33 levels	TRUE	reported	GCST90274812	textfile	2	1	TRUE	0.00221092	20.4963
Interleukin-33 levels	7	rs13336496	A	C	A	C	0.0936	-0.0266	0.8755	0.8613	FALSE	FALSE	FALSE	ieu-b-7	16	79491576	0.0353	466555	0.4516	Parkinson's disease || id:ieu-b-7	Parkinson's disease	Parkinson's disease || ||	TRUE	igd	NA	NA	NA	NA	NA	NA	NA	16	79491576	0.0203	4.01e-06	11780	Interleukin-33 levels	TRUE	reported	GCST90274812	textfile	2	1	TRUE	0.00180149	21.2562
Interleukin-33 levels	8	rs1427438	T	C	T	C	0.3362	-0.0788	0.0144	0.0142	FALSE	FALSE	FALSE	ieu-b-7	3	69721499	0.1906	11518	0.679201	Parkinson's disease || id:ieu-b-7	Parkinson's disease	Parkinson's disease || ||	TRUE	igd	NA	NA	NA	NA	NA	NA	NA	3	69721499	0.0761	9.97e-06	10891	Interleukin-33 levels	TRUE	reported	GCST90274812	textfile	2	1	TRUE	0.00178888	19.514
Interleukin-33 levels	9	rs17147023	T	C	T	C	0.0689	-0.0351	0.7409	0.7502	FALSE	FALSE	FALSE	ieu-b-7	9	133361010	0.0255	471013	0.1686	Parkinson's disease || id:ieu-b-7	Parkinson's disease	Parkinson's disease || ||	TRUE	igd	NA	NA	NA	NA	NA	NA	NA	9	133361010	0.0154	7.68e-06	11344	Interleukin-33 levels	TRUE	reported	GCST90274812	textfile	2	1	TRUE	0.00176143	20.0134
Interleukin-33 levels	10	rs17149396	C	G	C	G	0.1833	0.0099	0.0307	0.0269	FALSE	TRUE	FALSE	ieu-b-7	7	24423445	0.0722	468692	0.8913	Parkinson's disease || id:ieu-b-7	Parkinson's disease	Parkinson's disease || ||	TRUE	igd	NA	NA	NA	NA	NA	NA	NA	7	24423445	0.04	4.59e-06	11789	Interleukin-33 levels	TRUE	reported	GCST90274812	textfile	2	1	TRUE	0.0017781	20.9957
Interleukin-33 levels	11	rs28658099	A	T	A	T	0.0848	0.0217	0.8568	0.8571	FALSE	TRUE	FALSE	ieu-b-7	4	45839898	0.0285	482730	0.4457	Parkinson's disease || id:ieu-b-7	Parkinson's disease	Parkinson's disease || ||	TRUE	igd	NA	NA	NA	NA	NA	NA	NA	4	45839898	0.0188	6.46e-06	11773	Interleukin-33 levels	TRUE	reported	GCST90274812	textfile	2	1	TRUE	0.0017252	20.3424
Interleukin-33 levels	12	rs6099755	A	G	A	G	0.095	-0.0142	0.1263	0.1067	FALSE	FALSE	FALSE	ieu-b-7	20	56364589	0.0393	468692	0.718701	Parkinson's disease || id:ieu-b-7	Parkinson's disease	Parkinson's disease || ||	TRUE	igd	NA	NA	NA	NA	NA	NA	NA	20	56364589	0.0212	7.42e-06	11345	Interleukin-33 levels	TRUE	reported	GCST90274812	textfile	2	1	TRUE	0.00176686	20.077
Interleukin-33 levels	13	rs62556318	C	G	C	G	0.1308	-0.0923	0.9172	0.9186	FALSE	TRUE	FALSE	ieu-b-7	9	21663051	0.0679	11518	0.1743	Parkinson's disease || id:ieu-b-7	Parkinson's disease	Parkinson's disease || ||	TRUE	igd	NA	NA	NA	NA	NA	NA	NA	9	21663051	0.0277	2.34e-06	11345	Interleukin-33 levels	TRUE	reported	GCST90274812	textfile	2	1	TRUE	0.00196155	22.2936
Interleukin-33 levels	14	rs66755903	A	G	A	G	-0.0752	0.0361	0.2321	0.2253	FALSE	FALSE	FALSE	ieu-b-7	8	87995921	0.0273	468692	0.1865	Parkinson's disease || id:ieu-b-7	Parkinson's disease	Parkinson's disease || ||	TRUE	igd	NA	NA	NA	NA	NA	NA	NA	8	87995921	0.0162	3.45e-06	11345	Interleukin-33 levels	TRUE	reported	GCST90274812	textfile	2	1	TRUE	0.00189573	21.5441
Interleukin-33 levels	15	rs75671803	A	G	A	G	0.2055	-0.0371	0.9763	0.9773	FALSE	FALSE	FALSE	ieu-b-7	7	83421169	0.0784	468692	0.636099	Parkinson's disease || id:ieu-b-7	Parkinson's disease	Parkinson's disease || ||	TRUE	igd	NA	NA	NA	NA	NA	NA	NA	7	83421169	0.0451	5.2e-06	11785	Interleukin-33 levels	TRUE	reported	GCST90274812	textfile	2	1	TRUE	0.00175864	20.7585
Interleukin-33 levels	16	rs77248338	T	G	T	G	0.2314	0.0472	0.9759	0.9736	FALSE	FALSE	FALSE	ieu-b-7	15	98506292	0.0744	468692	0.5257	Parkinson's disease || id:ieu-b-7	Parkinson's disease	Parkinson's disease || ||	TRUE	igd	NA	NA	NA	NA	NA	NA	NA	15	98506292	0.0518	7.93e-06	10471	Interleukin-33 levels	TRUE	reported	GCST90274812	textfile	2	1	TRUE	0.00190218	19.9519
Interleukin-33 levels	17	rs7742625	C	G	C	G	0.0691	-0.0152	0.6997	0.7106	FALSE	TRUE	FALSE	ieu-b-7	6	38719850	0.0226	482730	0.5007	Parkinson's disease || id:ieu-b-7	Parkinson's disease	Parkinson's disease || ||	TRUE	igd	NA	NA	NA	NA	NA	NA	NA	6	38719850	0.0148	3.03e-06	11345	Interleukin-33 levels	TRUE	reported	GCST90274812	textfile	2	1	TRUE	0.00191776	21.795
Interleukin-33 levels	18	rs77792454	T	C	T	C	-0.1166	-0.0094	0.1064	0.1356	FALSE	FALSE	FALSE	ieu-b-7	6	156887397	0.0333	468692	0.7769	Parkinson's disease || id:ieu-b-7	Parkinson's disease	Parkinson's disease || ||	TRUE	igd	TRUE	rs77792454	rs74400610	T	C	G	C	6	156872261	0.0255	4.82e-06	8817	Interleukin-33 levels	TRUE	reported	GCST90274812	textfile	2	1	TRUE	0.00236574	20.9035
Interleukin-33 levels	19	rs78455659	A	G	A	G	0.1259	0.0235	0.9273	0.9386	FALSE	FALSE	FALSE	ieu-b-7	12	96439814	0.051	470485	0.6446	Parkinson's disease || id:ieu-b-7	Parkinson's disease	Parkinson's disease || ||	TRUE	igd	NA	NA	NA	NA	NA	NA	NA	12	96439814	0.0273	3.99e-06	11345	Interleukin-33 levels	TRUE	reported	GCST90274812	textfile	2	1	TRUE	0.00187115	21.2642
Interleukin-33 levels	20	rs79106704	T	C	T	C	-0.1015	-0.0919	0.1034	0.1033	FALSE	FALSE	FALSE	ieu-b-7	16	82635916	0.037	468692	0.0129599	Parkinson's disease || id:ieu-b-7	Parkinson's disease	Parkinson's disease || ||	TRUE	igd	TRUE	rs79106704	rs6565048	T	C	C	T	16	82628079	0.0227	7.77e-06	9909	Interleukin-33 levels	TRUE	reported	GCST90274812	textfile	2	1	TRUE	0.00201361	19.9891
Interleukin-33 levels	21	rs79417946	T	C	T	C	-0.1259	0.0114	0.0665	0.062	FALSE	FALSE	FALSE	ieu-b-7	9	31779365	0.0516	468692	0.8252	Parkinson's disease || id:ieu-b-7	Parkinson's disease	Parkinson's disease || ||	TRUE	igd	NA	NA	NA	NA	NA	NA	NA	9	31779365	0.0285	9.98e-06	11345	Interleukin-33 levels	TRUE	reported	GCST90274812	textfile	2	1	TRUE	0.00171716	19.5113
Interleukin-33 levels	22	rs8042883	T	C	T	C	-0.0681	0.0098	0.5496	0.5433	FALSE	FALSE	FALSE	ieu-b-7	15	66970271	0.0225	468692	0.662799	Parkinson's disease || id:ieu-b-7	Parkinson's disease	Parkinson's disease || ||	TRUE	igd	NA	NA	NA	NA	NA	NA	NA	15	66970271	0.0135	4.55e-07	11345	Interleukin-33 levels	TRUE	reported	GCST90274812	textfile	2	1	TRUE	0.00223794	25.4419
Interleukin-15 receptor subunit alpha levels	1	rs1004308	T	C	T	C	0.0727	-0.0372	0.1931	0.1937	FALSE	FALSE	FALSE	ieu-b-7	9	124977274	0.0298	468692	0.2117	Parkinson's disease || id:ieu-b-7	Parkinson's disease	Parkinson's disease || ||	TRUE	igd	NA	NA	NA	NA	NA	NA	NA	9	124977274	0.0162	7.2e-06	11783	Interleukin-15 receptor subunit alpha levels	TRUE	reported	GCST90274800	textfile	2	1	TRUE	0.00170624	20.1356
Interleukin-15 receptor subunit alpha levels	2	rs117428573	A	C	A	C	-0.3132	-0.25	0.0119	0.0136	FALSE	FALSE	FALSE	ieu-b-7	8	27696981	0.0899	480593	0.00539995	Parkinson's disease || id:ieu-b-7	Parkinson's disease	Parkinson's disease || ||	TRUE	igd	NA	NA	NA	NA	NA	NA	NA	8	27696981	0.0684	4.67e-06	10857	Interleukin-15 receptor subunit alpha levels	TRUE	reported	GCST90274800	textfile	2	1	TRUE	0.00192745	20.9629
Interleukin-15 receptor subunit alpha levels	3	rs117484888	A	G	A	G	0.3794	-0.1094	0.0158	0.0137	FALSE	FALSE	FALSE	ieu-b-7	21	15303777	0.1958	10639	0.5764	Parkinson's disease || id:ieu-b-7	Parkinson's disease	Parkinson's disease || ||	TRUE	igd	NA	NA	NA	NA	NA	NA	NA	21	15303777	0.0799	2.05e-06	7423	Interleukin-15 receptor subunit alpha levels	TRUE	reported	GCST90274800	textfile	2	1	TRUE	0.00302834	22.5416
Interleukin-15 receptor subunit alpha levels	4	rs12570881	A	T	A	T	-0.0867	0.0061	0.8028	0.8129	FALSE	TRUE	FALSE	ieu-b-7	10	5815194	0.0274	27693	0.8227	Parkinson's disease || id:ieu-b-7	Parkinson's disease	Parkinson's disease || ||	TRUE	igd	NA	NA	NA	NA	NA	NA	NA	10	5815194	0.0174	6.27e-07	11344	Interleukin-15 receptor subunit alpha levels	TRUE	reported	GCST90274800	textfile	2	1	TRUE	0.00218386	24.8235
Interleukin-15 receptor subunit alpha levels	5	rs140982443	T	C	T	C	0.1794	-0.0978	0.963	0.9727	FALSE	FALSE	FALSE	ieu-b-7	19	14884841	0.0641	482730	0.127	Parkinson's disease || id:ieu-b-7	Parkinson's disease	Parkinson's disease || ||	TRUE	igd	TRUE	rs140982443	rs41360944	C	T	A	G	19	14884642	0.0395	5.58e-06	9906	Interleukin-15 receptor subunit alpha levels	TRUE	reported	GCST90274800	textfile	2	1	TRUE	0.00207802	20.6235
Interleukin-15 receptor subunit alpha levels	6	rs142180961	T	C	T	C	0.2488	0.1135	0.0166	0.0178	FALSE	FALSE	FALSE	ieu-b-7	12	38055500	0.1266	11518	0.3698	Parkinson's disease || id:ieu-b-7	Parkinson's disease	Parkinson's disease || ||	TRUE	igd	NA	NA	NA	NA	NA	NA	NA	12	38055500	0.0553	6.82e-06	10724	Interleukin-15 receptor subunit alpha levels	TRUE	reported	GCST90274800	textfile	2	1	TRUE	0.00188397	20.2381
Interleukin-15 receptor subunit alpha levels	7	rs145793996	A	G	A	G	-0.2278	0.1345	0.9801	0.9781	FALSE	FALSE	FALSE	ieu-b-7	11	37594094	0.0789	468692	0.0881901	Parkinson's disease || id:ieu-b-7	Parkinson's disease	Parkinson's disease || ||	TRUE	igd	NA	NA	NA	NA	NA	NA	NA	11	37594094	0.0492	3.66e-06	11779	Interleukin-15 receptor subunit alpha levels	TRUE	reported	GCST90274800	textfile	2	1	TRUE	0.00181668	21.434
Interleukin-15 receptor subunit alpha levels	8	rs17129907	A	G	A	G	-0.1381	-0.0144	0.9503	0.9515	FALSE	FALSE	FALSE	ieu-b-7	11	97047987	0.0569	468692	0.8008	Parkinson's disease || id:ieu-b-7	Parkinson's disease	Parkinson's disease || ||	TRUE	igd	NA	NA	NA	NA	NA	NA	NA	11	97047987	0.0303	5.17e-06	11790	Interleukin-15 receptor subunit alpha levels	TRUE	reported	GCST90274800	textfile	2	1	TRUE	0.00175883	20.7696
Interleukin-15 receptor subunit alpha levels	9	rs17635883	A	G	A	G	0.0937	-0.0154	0.122	0.1034	FALSE	FALSE	FALSE	ieu-b-7	7	51409710	0.0387	469486	0.6903	Parkinson's disease || id:ieu-b-7	Parkinson's disease	Parkinson's disease || ||	TRUE	igd	NA	NA	NA	NA	NA	NA	NA	7	51409710	0.0211	8.96e-06	11344	Interleukin-15 receptor subunit alpha levels	TRUE	reported	GCST90274800	textfile	2	1	TRUE	0.00173538	19.7169
Interleukin-15 receptor subunit alpha levels	10	rs2228059	T	G	T	G	0.3692	-0.0067	0.5146	0.5218	FALSE	FALSE	FALSE	ieu-b-7	10	6002368	0.0169	482730	0.6921	Parkinson's disease || id:ieu-b-7	Parkinson's disease	Parkinson's disease || ||	TRUE	igd	NA	NA	NA	NA	NA	NA	NA	10	6002368	0.0127	8.39e-186	11344	Interleukin-15 receptor subunit alpha levels	TRUE	reported	GCST90274800	textfile	2	1	TRUE	0.0693336	844.966
Interleukin-15 receptor subunit alpha levels	11	rs2836464	A	G	A	G	0.0796	-0.0477	0.8384	0.8383	FALSE	FALSE	FALSE	ieu-b-7	21	39896592	0.0302	468692	0.1141	Parkinson's disease || id:ieu-b-7	Parkinson's disease	Parkinson's disease || ||	TRUE	igd	NA	NA	NA	NA	NA	NA	NA	21	39896592	0.0169	2.48e-06	11791	Interleukin-15 receptor subunit alpha levels	TRUE	reported	GCST90274800	textfile	2	1	TRUE	0.00187796	22.1809
Interleukin-15 receptor subunit alpha levels	12	rs4459616	T	C	T	C	0.14	-0.0343	0.0658	0.0645	FALSE	FALSE	FALSE	ieu-b-7	18	12181351	0.0466	468692	0.4626	Parkinson's disease || id:ieu-b-7	Parkinson's disease	Parkinson's disease || ||	TRUE	igd	TRUE	rs4459616	rs78533456	T	C	A	G	18	12175379	0.0294	1.92e-06	9899	Interleukin-15 receptor subunit alpha levels	TRUE	reported	GCST90274800	textfile	2	1	TRUE	0.00228547	22.6712
Interleukin-15 receptor subunit alpha levels	13	rs4772056	C	G	C	G	0.0894	-0.0314	0.8608	0.8585	FALSE	TRUE	FALSE	ieu-b-7	13	98893318	0.0329	468692	0.3392	Parkinson's disease || id:ieu-b-7	Parkinson's disease	Parkinson's disease || ||	TRUE	igd	NA	NA	NA	NA	NA	NA	NA	13	98893318	0.0197	5.68e-06	11344	Interleukin-15 receptor subunit alpha levels	TRUE	reported	GCST90274800	textfile	2	1	TRUE	0.00181213	20.5905
Interleukin-15 receptor subunit alpha levels	14	rs56240706	A	T	A	T	0.0919	0.0473	0.8082	0.8531	FALSE	TRUE	FALSE	ieu-b-7	4	20172591	0.0319	468692	0.1373	Parkinson's disease || id:ieu-b-7	Parkinson's disease	Parkinson's disease || ||	TRUE	igd	TRUE	rs56240706	rs4696947	T	A	C	T	4	20169693	0.0193	1.92e-06	8861	Interleukin-15 receptor subunit alpha levels	TRUE	reported	GCST90274800	textfile	2	1	TRUE	0.00255225	22.6683
Interleukin-15 receptor subunit alpha levels	15	rs62144964	A	G	A	G	0.0852	0.0392	0.1223	0.1214	FALSE	FALSE	FALSE	ieu-b-7	2	31652761	0.0302	482730	0.1946	Parkinson's disease || id:ieu-b-7	Parkinson's disease	Parkinson's disease || ||	TRUE	igd	NA	NA	NA	NA	NA	NA	NA	2	31652761	0.019	7.32e-06	11782	Interleukin-15 receptor subunit alpha levels	TRUE	reported	GCST90274800	textfile	2	1	TRUE	0.00170378	20.1047
Interleukin-15 receptor subunit alpha levels	16	rs6751509	T	C	T	C	0.0577	-0.0128	0.3704	0.3752	FALSE	FALSE	FALSE	ieu-b-7	2	52233445	0.0231	468692	0.5783	Parkinson's disease || id:ieu-b-7	Parkinson's disease	Parkinson's disease || ||	TRUE	igd	NA	NA	NA	NA	NA	NA	NA	2	52233445	0.0128	6.55e-06	11782	Interleukin-15 receptor subunit alpha levels	TRUE	reported	GCST90274800	textfile	2	1	TRUE	0.00172173	20.3169
Interleukin-15 receptor subunit alpha levels	17	rs679874	A	G	A	G	0.0629	-0.0161	0.7114	0.7209	FALSE	FALSE	FALSE	ieu-b-7	6	153065996	0.0239	471013	0.5001	Parkinson's disease || id:ieu-b-7	Parkinson's disease	Parkinson's disease || ||	TRUE	igd	NA	NA	NA	NA	NA	NA	NA	6	153065996	0.0139	6.03e-06	11779	Interleukin-15 receptor subunit alpha levels	TRUE	reported	GCST90274800	textfile	2	1	TRUE	0.00173544	20.4738
Interleukin-15 receptor subunit alpha levels	18	rs6845172	C	G	C	G	0.0778	-0.0241	0.8203	0.8136	FALSE	TRUE	FALSE	ieu-b-7	4	140657353	0.0287	468692	0.4013	Parkinson's disease || id:ieu-b-7	Parkinson's disease	Parkinson's disease || ||	TRUE	igd	NA	NA	NA	NA	NA	NA	NA	4	140657353	0.0162	1.57e-06	11772	Interleukin-15 receptor subunit alpha levels	TRUE	reported	GCST90274800	textfile	2	1	TRUE	0.00195537	23.0598
Interleukin-15 receptor subunit alpha levels	19	rs7137828	T	C	T	C	-0.0748	-0.0058	0.5243	0.5143	FALSE	FALSE	FALSE	ieu-b-7	12	111932800	0.0169	482730	0.7331	Parkinson's disease || id:ieu-b-7	Parkinson's disease	Parkinson's disease || ||	TRUE	igd	NA	NA	NA	NA	NA	NA	NA	12	111932800	0.0133	1.87e-08	11344	Interleukin-15 receptor subunit alpha levels	TRUE	reported	GCST90274800	textfile	2	1	TRUE	0.00278051	31.6245
Interleukin-15 receptor subunit alpha levels	20	rs75485361	A	G	A	G	-0.07	-0.0282	0.2414	0.23	FALSE	FALSE	FALSE	ieu-b-7	3	174440202	0.0263	468692	0.2847	Parkinson's disease || id:ieu-b-7	Parkinson's disease	Parkinson's disease || ||	TRUE	igd	TRUE	rs75485361	rs79748202	A	G	T	C	3	174432353	0.0158	9.41e-06	11343	Interleukin-15 receptor subunit alpha levels	TRUE	reported	GCST90274800	textfile	2	1	TRUE	0.00172744	19.6248
Interleukin-15 receptor subunit alpha levels	21	rs7898286	T	G	T	G	-0.1967	0.0238	0.3975	0.4201	FALSE	FALSE	FALSE	ieu-b-7	10	6009462	0.0224	471013	0.2865	Parkinson's disease || id:ieu-b-7	Parkinson's disease	Parkinson's disease || ||	TRUE	igd	NA	NA	NA	NA	NA	NA	NA	10	6009462	0.0135	4.34e-48	11344	Interleukin-15 receptor subunit alpha levels	TRUE	reported	GCST90274800	textfile	2	1	TRUE	0.0183706	212.258
Interleukin-15 receptor subunit alpha levels	22	rs79638163	T	G	T	G	0.176	-0.132	0.9701	0.9724	FALSE	FALSE	FALSE	ieu-b-7	1	235799305	0.0762	468692	0.0829908	Parkinson's disease || id:ieu-b-7	Parkinson's disease	Parkinson's disease || ||	TRUE	igd	NA	NA	NA	NA	NA	NA	NA	1	235799305	0.0398	9.77e-06	11792	Interleukin-15 receptor subunit alpha levels	TRUE	reported	GCST90274800	textfile	2	1	TRUE	0.00165559	19.5517
Interleukin-15 receptor subunit alpha levels	23	rs9270551	A	G	A	G	0.0749	-0.0063	0.7077	0.685	FALSE	FALSE	FALSE	ieu-b-7	6	32560501	0.0269	24677	0.8159	Parkinson's disease || id:ieu-b-7	Parkinson's disease	Parkinson's disease || ||	TRUE	igd	NA	NA	NA	NA	NA	NA	NA	6	32560501	0.0153	9.81e-07	11344	Interleukin-15 receptor subunit alpha levels	TRUE	reported	GCST90274800	textfile	2	1	TRUE	0.00210813	23.961
C-X-C motif chemokine 5 levels	1	rs10403201	A	G	A	G	-0.0601	0.0231	0.2925	0.3126	FALSE	FALSE	FALSE	ieu-b-7	19	14764810	0.0182	482730	0.204	Parkinson's disease || id:ieu-b-7	Parkinson's disease	Parkinson's disease || ||	TRUE	igd	NA	NA	NA	NA	NA	NA	NA	19	14764810	0.0127	2.22e-06	14730	C-X-C motif chemokine 5 levels	TRUE	reported	GCST90274782	textfile	2	1	TRUE	0.00151803	22.3915
C-X-C motif chemokine 5 levels	2	rs10821552	A	C	A	C	-0.1132	0.0115	0.3353	0.3482	FALSE	FALSE	FALSE	ieu-b-7	9	136939992	0.0233	468692	0.6217	Parkinson's disease || id:ieu-b-7	Parkinson's disease	Parkinson's disease || ||	TRUE	igd	NA	NA	NA	NA	NA	NA	NA	9	136939992	0.0156	3.97e-13	9841	C-X-C motif chemokine 5 levels	TRUE	reported	GCST90274782	textfile	2	1	TRUE	0.00532215	52.6448
C-X-C motif chemokine 5 levels	3	rs11734099	A	G	A	G	0.0769	-0.0128	0.1845	0.172	FALSE	FALSE	FALSE	ieu-b-7	4	6891435	0.0226	482730	0.5713	Parkinson's disease || id:ieu-b-7	Parkinson's disease	Parkinson's disease || ||	TRUE	igd	NA	NA	NA	NA	NA	NA	NA	4	6891435	0.0153	5e-07	14731	C-X-C motif chemokine 5 levels	TRUE	reported	GCST90274782	textfile	2	1	TRUE	0.00171196	25.2587
C-X-C motif chemokine 5 levels	4	rs146553494	A	G	A	G	0.1844	-0.0002	0.0265	0.03	FALSE	FALSE	FALSE	ieu-b-7	3	183850210	0.0513	482730	0.9977	Parkinson's disease || id:ieu-b-7	Parkinson's disease	Parkinson's disease || ||	TRUE	igd	NA	NA	NA	NA	NA	NA	NA	3	183850210	0.0377	1e-06	14733	C-X-C motif chemokine 5 levels	TRUE	reported	GCST90274782	textfile	2	1	TRUE	0.00162122	23.921
C-X-C motif chemokine 5 levels	5	rs2004100	T	C	T	C	0.0675	0.0057	0.2492	0.2469	FALSE	FALSE	FALSE	ieu-b-7	8	144554731	0.0221	482730	0.798	Parkinson's disease || id:ieu-b-7	Parkinson's disease	Parkinson's disease || ||	TRUE	igd	NA	NA	NA	NA	NA	NA	NA	8	144554731	0.0147	4.39e-06	13224	C-X-C motif chemokine 5 levels	TRUE	reported	GCST90274782	textfile	2	1	TRUE	0.00159191	21.0818
C-X-C motif chemokine 5 levels	6	rs2647400	C	G	C	G	0.0631	0.013	0.2784	0.2715	FALSE	TRUE	FALSE	ieu-b-7	6	76351999	0.0193	482730	0.5007	Parkinson's disease || id:ieu-b-7	Parkinson's disease	Parkinson's disease || ||	TRUE	igd	NA	NA	NA	NA	NA	NA	NA	6	76351999	0.013	1.21e-06	14734	C-X-C motif chemokine 5 levels	TRUE	reported	GCST90274782	textfile	2	1	TRUE	0.00159646	23.5566
C-X-C motif chemokine 5 levels	7	rs28750249	T	G	T	G	-0.118	0.0032	0.945	0.9445	FALSE	FALSE	FALSE	ieu-b-7	4	23807061	0.0497	468692	0.9489	Parkinson's disease || id:ieu-b-7	Parkinson's disease	Parkinson's disease || ||	TRUE	igd	NA	NA	NA	NA	NA	NA	NA	4	23807061	0.0266	9.16e-06	14735	C-X-C motif chemokine 5 levels	TRUE	reported	GCST90274782	textfile	2	1	TRUE	0.00133374	19.6762
C-X-C motif chemokine 5 levels	8	rs3183927	A	G	A	G	-0.0619	-0.0056	0.6436	0.6239	FALSE	FALSE	FALSE	ieu-b-7	9	100684757	0.0174	482730	0.745901	Parkinson's disease || id:ieu-b-7	Parkinson's disease	Parkinson's disease || ||	TRUE	igd	NA	NA	NA	NA	NA	NA	NA	9	100684757	0.0121	3.13e-07	14725	C-X-C motif chemokine 5 levels	TRUE	reported	GCST90274782	textfile	2	1	TRUE	0.00177412	26.1669
C-X-C motif chemokine 5 levels	9	rs425535	T	C	T	C	0.5063	0.017	0.1127	0.1131	FALSE	FALSE	FALSE	ieu-b-7	4	74863997	0.0356	468692	0.6321	Parkinson's disease || id:ieu-b-7	Parkinson's disease	Parkinson's disease || ||	TRUE	igd	NA	NA	NA	NA	NA	NA	NA	4	74863997	0.0181	3.52e-172	14731	C-X-C motif chemokine 5 levels	TRUE	reported	GCST90274782	textfile	2	1	TRUE	0.0504371	782.348
C-X-C motif chemokine 5 levels	10	rs4279906	T	C	T	C	0.2082	-0.0286	0.0209	0.0244	FALSE	FALSE	FALSE	ieu-b-7	1	211477063	0.0743	468692	0.6998	Parkinson's disease || id:ieu-b-7	Parkinson's disease	Parkinson's disease || ||	TRUE	igd	NA	NA	NA	NA	NA	NA	NA	1	211477063	0.042	7.15e-07	14717	C-X-C motif chemokine 5 levels	TRUE	reported	GCST90274782	textfile	2	1	TRUE	0.00166694	24.5699
C-X-C motif chemokine 5 levels	11	rs59312158	A	G	A	G	-0.19	0.0911	0.0309	0.0224	FALSE	FALSE	FALSE	ieu-b-7	16	88582345	0.0848	468692	0.2827	Parkinson's disease || id:ieu-b-7	Parkinson's disease	Parkinson's disease || ||	TRUE	igd	NA	NA	NA	NA	NA	NA	NA	16	88582345	0.0385	8.01e-07	13672	C-X-C motif chemokine 5 levels	TRUE	reported	GCST90274782	textfile	2	1	TRUE	0.0017782	24.3513
C-X-C motif chemokine 5 levels	12	rs6993770	A	T	A	T	-0.1058	-0.0197	0.7312	0.7103	FALSE	TRUE	FALSE	ieu-b-7	8	106581528	0.0198	482730	0.3181	Parkinson's disease || id:ieu-b-7	Parkinson's disease	Parkinson's disease || ||	TRUE	igd	NA	NA	NA	NA	NA	NA	NA	8	106581528	0.0135	4.61e-15	14288	C-X-C motif chemokine 5 levels	TRUE	reported	GCST90274782	textfile	2	1	TRUE	0.00428025	61.4106
C-X-C motif chemokine 5 levels	13	rs7090111	C	G	C	G	-0.1734	-0.0088	0.5834	0.5668	FALSE	TRUE	TRUE	ieu-b-7	10	65077994	0.017	482730	0.6052	Parkinson's disease || id:ieu-b-7	Parkinson's disease	Parkinson's disease || ||	TRUE	igd	NA	NA	NA	NA	NA	NA	NA	10	65077994	0.0117	1.08e-49	14735	C-X-C motif chemokine 5 levels	TRUE	reported	GCST90274782	textfile	2	1	FALSE	0.0146876	219.618
C-X-C motif chemokine 5 levels	14	rs7090111	C	G	C	G	-0.1734	-0.0088	0.5834	0.5668	FALSE	TRUE	TRUE	ieu-b-7	10	65077994	0.017	482730	0.6052	Parkinson's disease || id:ieu-b-7	Parkinson's disease	Parkinson's disease || ||	TRUE	igd	NA	NA	NA	NA	NA	NA	NA	10	65077994	0.0117	1.08e-49	14735	C-X-C motif chemokine 5 levels	TRUE	reported	GCST90274782	textfile	2	2	FALSE	0.0146876	219.618
C-X-C motif chemokine 5 levels	15	rs7197943	A	C	A	C	0.0552	0.0271	0.6522	0.6376	FALSE	FALSE	FALSE	ieu-b-7	16	64226202	0.0234	468692	0.2465	Parkinson's disease || id:ieu-b-7	Parkinson's disease	Parkinson's disease || ||	TRUE	igd	NA	NA	NA	NA	NA	NA	NA	16	64226202	0.0123	7.2e-06	14719	C-X-C motif chemokine 5 levels	TRUE	reported	GCST90274782	textfile	2	1	TRUE	0.00136646	20.1377
C-X-C motif chemokine 5 levels	16	rs7636889	A	G	A	G	-0.0768	0.0076	0.7593	0.7599	FALSE	FALSE	FALSE	ieu-b-7	3	56874033	0.022	482730	0.7307	Parkinson's disease || id:ieu-b-7	Parkinson's disease	Parkinson's disease || ||	TRUE	igd	NA	NA	NA	NA	NA	NA	NA	3	56874033	0.0137	2.07e-08	14733	C-X-C motif chemokine 5 levels	TRUE	reported	GCST90274782	textfile	2	1	TRUE	0.00212846	31.4212
C-X-C motif chemokine 5 levels	17	rs7781261	A	G	A	G	-0.0675	-0.0016	0.8155	0.8383	FALSE	FALSE	FALSE	ieu-b-7	7	112049821	0.03	468692	0.9568	Parkinson's disease || id:ieu-b-7	Parkinson's disease	Parkinson's disease || ||	TRUE	igd	TRUE	rs7781261	rs2520476	G	A	T	C	7	111992684	0.0151	7.81e-06	14728	C-X-C motif chemokine 5 levels	TRUE	reported	GCST90274782	textfile	2	1	TRUE	0.00135494	19.98
C-X-C motif chemokine 5 levels	18	rs79649467	T	G	T	G	-0.1721	-0.0833	0.0605	0.0538	FALSE	FALSE	FALSE	ieu-b-7	4	74880852	0.0572	468692	0.1455	Parkinson's disease || id:ieu-b-7	Parkinson's disease	Parkinson's disease || ||	TRUE	igd	NA	NA	NA	NA	NA	NA	NA	4	74880852	0.0276	4.5e-10	14288	C-X-C motif chemokine 5 levels	TRUE	reported	GCST90274782	textfile	2	1	TRUE	0.00271389	38.8761
C-X-C motif chemokine 5 levels	19	rs79649467	T	G	T	G	-0.1721	-0.0833	0.0605	0.0538	FALSE	FALSE	FALSE	ieu-b-7	4	74880852	0.0572	468692	0.1455	Parkinson's disease || id:ieu-b-7	Parkinson's disease	Parkinson's disease || ||	TRUE	igd	NA	NA	NA	NA	NA	NA	NA	4	74880852	0.0276	4.5e-10	14288	C-X-C motif chemokine 5 levels	TRUE	reported	GCST90274782	textfile	2	2	TRUE	0.00271389	38.8761
C-X-C motif chemokine 5 levels	20	rs916776	T	G	T	G	0.0546	-0.0042	0.3883	0.3869	FALSE	FALSE	FALSE	ieu-b-7	16	26812516	0.0241	468692	0.8607	Parkinson's disease || id:ieu-b-7	Parkinson's disease	Parkinson's disease || ||	TRUE	igd	NA	NA	NA	NA	NA	NA	NA	16	26812516	0.0122	7.63e-06	14287	C-X-C motif chemokine 5 levels	TRUE	reported	GCST90274782	textfile	2	1	TRUE	0.00139996	20.0265
C-X-C motif chemokine 5 levels	21	rs9429422	T	C	T	C	0.0601	0.0029	0.2633	0.2444	FALSE	FALSE	FALSE	ieu-b-7	1	112467126	0.026	468692	0.9121	Parkinson's disease || id:ieu-b-7	Parkinson's disease	Parkinson's disease || ||	TRUE	igd	NA	NA	NA	NA	NA	NA	NA	1	112467126	0.0135	8.51e-06	14288	C-X-C motif chemokine 5 levels	TRUE	reported	GCST90274782	textfile	2	1	TRUE	0.00138519	19.8162
Interleukin-4 levels	1	rs10152568	T	C	T	C	-0.0682	-0.0326	0.6072	0.6106	FALSE	FALSE	FALSE	ieu-b-7	15	39160069	0.0319	13655	0.3055	Parkinson's disease || id:ieu-b-7	Parkinson's disease	Parkinson's disease || ||	TRUE	igd	NA	NA	NA	NA	NA	NA	NA	15	39160069	0.0154	9.49e-06	11784	Interleukin-4 levels	TRUE	reported	GCST90274813	textfile	2	1	TRUE	0.00166155	19.6089
Interleukin-4 levels	2	rs10910814	C	G	C	G	0.1919	0.0505	0.0407	0.0451	FALSE	TRUE	FALSE	ieu-b-7	1	145431073	0.0442	480593	0.2536	Parkinson's disease || id:ieu-b-7	Parkinson's disease	Parkinson's disease || ||	TRUE	igd	TRUE	rs10910814	rs7526224	C	G	T	C	1	145427960	0.0417	4.19e-06	7953	Interleukin-4 levels	TRUE	reported	GCST90274813	textfile	2	1	TRUE	0.00265578	21.1723
Interleukin-4 levels	3	rs116963481	A	G	A	G	0.2805	-0.0583	0.9846	0.9864	FALSE	FALSE	FALSE	ieu-b-7	10	34284406	0.1072	468692	0.5865	Parkinson's disease || id:ieu-b-7	Parkinson's disease	Parkinson's disease || ||	TRUE	igd	NA	NA	NA	NA	NA	NA	NA	10	34284406	0.0592	2.16e-06	11793	Interleukin-4 levels	TRUE	reported	GCST90274813	textfile	2	1	TRUE	0.00190008	22.4465
Interleukin-4 levels	4	rs11989681	A	G	A	G	0.0678	-0.009	0.5982	0.5892	FALSE	FALSE	FALSE	ieu-b-7	8	22649912	0.0222	471013	0.686	Parkinson's disease || id:ieu-b-7	Parkinson's disease	Parkinson's disease || ||	TRUE	igd	NA	NA	NA	NA	NA	NA	NA	8	22649912	0.0136	6.19e-07	11345	Interleukin-4 levels	TRUE	reported	GCST90274813	textfile	2	1	TRUE	0.00218588	24.8488
Interleukin-4 levels	5	rs12481726	T	C	T	C	-0.313	0.0126	0.0162	0.0113	FALSE	FALSE	FALSE	ieu-b-7	20	51651490	0.1609	11518	0.9375	Parkinson's disease || id:ieu-b-7	Parkinson's disease	Parkinson's disease || ||	TRUE	igd	NA	NA	NA	NA	NA	NA	NA	20	51651490	0.0706	9.27e-06	9849	Interleukin-4 levels	TRUE	reported	GCST90274813	textfile	2	1	TRUE	0.00199169	19.6513
Interleukin-4 levels	6	rs12641440	C	G	C	G	-0.1181	-0.016	0.9065	0.9293	FALSE	TRUE	FALSE	ieu-b-7	4	185529634	0.044	468692	0.716	Parkinson's disease || id:ieu-b-7	Parkinson's disease	Parkinson's disease || ||	TRUE	igd	NA	NA	NA	NA	NA	NA	NA	4	185529634	0.025	2.31e-06	11345	Interleukin-4 levels	TRUE	reported	GCST90274813	textfile	2	1	TRUE	0.00196319	22.3122
Interleukin-4 levels	7	rs12900168	A	G	A	G	0.0716	0.0018	0.4842	0.5336	FALSE	FALSE	FALSE	ieu-b-7	15	79066932	0.0267	15976	0.9452	Parkinson's disease || id:ieu-b-7	Parkinson's disease	Parkinson's disease || ||	TRUE	igd	NA	NA	NA	NA	NA	NA	NA	15	79066932	0.0152	2.47e-06	10471	Interleukin-4 levels	TRUE	reported	GCST90274813	textfile	2	1	TRUE	0.00211462	22.1848
Interleukin-4 levels	8	rs13418255	A	G	A	G	0.0701	0.0027	0.7233	0.7544	FALSE	FALSE	FALSE	ieu-b-7	2	107668175	0.0262	468692	0.9164	Parkinson's disease || id:ieu-b-7	Parkinson's disease	Parkinson's disease || ||	TRUE	igd	NA	NA	NA	NA	NA	NA	NA	2	107668175	0.0153	4.61e-06	11345	Interleukin-4 levels	TRUE	reported	GCST90274813	textfile	2	1	TRUE	0.00184691	20.9883
Interleukin-4 levels	9	rs1490743	T	G	T	G	-0.1338	-0.0348	0.0752	0.0711	FALSE	FALSE	FALSE	ieu-b-7	9	117036047	0.04	482730	0.3844	Parkinson's disease || id:ieu-b-7	Parkinson's disease	Parkinson's disease || ||	TRUE	igd	NA	NA	NA	NA	NA	NA	NA	9	117036047	0.0278	1.49e-06	10281	Interleukin-4 levels	TRUE	reported	GCST90274813	textfile	2	1	TRUE	0.00224807	23.16
Interleukin-4 levels	10	rs2502347	T	C	T	C	-0.077	0.0376	0.2195	0.231	FALSE	FALSE	FALSE	ieu-b-7	1	243071390	0.0269	468692	0.1627	Parkinson's disease || id:ieu-b-7	Parkinson's disease	Parkinson's disease || ||	TRUE	igd	NA	NA	NA	NA	NA	NA	NA	1	243071390	0.0167	4.01e-06	11345	Interleukin-4 levels	TRUE	reported	GCST90274813	textfile	2	1	TRUE	0.00187038	21.2555
Interleukin-4 levels	11	rs371539	T	G	T	G	0.0797	0.0094	0.8324	0.8203	FALSE	FALSE	FALSE	ieu-b-7	11	131406108	0.0297	468692	0.7509	Parkinson's disease || id:ieu-b-7	Parkinson's disease	Parkinson's disease || ||	TRUE	igd	NA	NA	NA	NA	NA	NA	NA	11	131406108	0.0177	6.71e-06	11775	Interleukin-4 levels	TRUE	reported	GCST90274813	textfile	2	1	TRUE	0.00171895	20.272
Interleukin-4 levels	12	rs4876407	T	G	T	G	-0.1391	0.0845	0.9451	0.9502	FALSE	FALSE	FALSE	ieu-b-7	8	119274249	0.055	468692	0.124	Parkinson's disease || id:ieu-b-7	Parkinson's disease	Parkinson's disease || ||	TRUE	igd	NA	NA	NA	NA	NA	NA	NA	8	119274249	0.0299	3.28e-06	11788	Interleukin-4 levels	TRUE	reported	GCST90274813	textfile	2	1	TRUE	0.00183263	21.6391
Interleukin-4 levels	13	rs61984458	T	C	T	C	-0.1955	0.0402	0.0285	0.0248	FALSE	FALSE	FALSE	ieu-b-7	14	64861479	0.0627	482730	0.5213	Parkinson's disease || id:ieu-b-7	Parkinson's disease	Parkinson's disease || ||	TRUE	igd	NA	NA	NA	NA	NA	NA	NA	14	64861479	0.043	5.45e-06	11345	Interleukin-4 levels	TRUE	reported	GCST90274813	textfile	2	1	TRUE	0.0018187	20.6671
Interleukin-4 levels	14	rs669029	A	G	A	G	-0.0699	-0.0124	0.7524	0.7621	FALSE	FALSE	FALSE	ieu-b-7	18	10579314	0.024	482730	0.6045	Parkinson's disease || id:ieu-b-7	Parkinson's disease	Parkinson's disease || ||	TRUE	igd	NA	NA	NA	NA	NA	NA	NA	18	10579314	0.0158	9.69e-06	11345	Interleukin-4 levels	TRUE	reported	GCST90274813	textfile	2	1	TRUE	0.00172221	19.5688
Interleukin-4 levels	15	rs6712163	T	C	T	C	0.0609	0.0013	0.546	0.5714	FALSE	FALSE	FALSE	ieu-b-7	2	43501970	0.0183	482730	0.9413	Parkinson's disease || id:ieu-b-7	Parkinson's disease	Parkinson's disease || ||	TRUE	igd	NA	NA	NA	NA	NA	NA	NA	2	43501970	0.0136	7.54e-06	11344	Interleukin-4 levels	TRUE	reported	GCST90274813	textfile	2	1	TRUE	0.00176451	20.0484
Interleukin-4 levels	16	rs71552590	T	C	T	C	0.0782	0.0389	0.6589	0.6159	FALSE	FALSE	FALSE	ieu-b-7	6	62668781	0.0229	468692	0.0890102	Parkinson's disease || id:ieu-b-7	Parkinson's disease	Parkinson's disease || ||	TRUE	igd	TRUE	rs71552590	rs9445697	C	T	C	A	6	62665592	0.0173	6.18e-06	7943	Interleukin-4 levels	TRUE	reported	GCST90274813	textfile	2	1	TRUE	0.00256579	20.4273
Interleukin-4 levels	17	rs75610895	T	C	T	C	-0.2354	8e-04	0.0253	0.0253	FALSE	FALSE	FALSE	ieu-b-7	10	6800809	0.0591	482730	0.9897	Parkinson's disease || id:ieu-b-7	Parkinson's disease	Parkinson's disease || ||	TRUE	igd	NA	NA	NA	NA	NA	NA	NA	10	6800809	0.045	1.68e-07	11787	Interleukin-4 levels	TRUE	reported	GCST90274813	textfile	2	1	TRUE	0.00231621	27.3599
Interleukin-4 levels	18	rs7587695	A	C	A	C	0.0598	0.0239	0.6086	0.6008	FALSE	FALSE	FALSE	ieu-b-7	2	172513639	0.0228	468692	0.2944	Parkinson's disease || id:ieu-b-7	Parkinson's disease	Parkinson's disease || ||	TRUE	igd	NA	NA	NA	NA	NA	NA	NA	2	172513639	0.0134	8.09e-06	11793	Interleukin-4 levels	TRUE	reported	GCST90274813	textfile	2	1	TRUE	0.00168591	19.9122
Interleukin-4 levels	19	rs76678067	T	G	T	G	0.1045	-0.0125	0.9046	0.912	FALSE	FALSE	FALSE	ieu-b-7	15	79597917	0.04	468692	0.7546	Parkinson's disease || id:ieu-b-7	Parkinson's disease	Parkinson's disease || ||	TRUE	igd	NA	NA	NA	NA	NA	NA	NA	15	79597917	0.0231	6.07e-06	11345	Interleukin-4 levels	TRUE	reported	GCST90274813	textfile	2	1	TRUE	0.00180062	20.4612
Interleukin-4 levels	20	rs79359966	A	C	A	C	-0.1552	0.0531	0.9596	0.9588	FALSE	FALSE	FALSE	ieu-b-7	8	71370392	0.0579	468692	0.3584	Parkinson's disease || id:ieu-b-7	Parkinson's disease	Parkinson's disease || ||	TRUE	igd	NA	NA	NA	NA	NA	NA	NA	8	71370392	0.0345	6.84e-06	11775	Interleukin-4 levels	TRUE	reported	GCST90274813	textfile	2	1	TRUE	0.00171569	20.2335
Interleukin-4 levels	21	rs802281	T	G	T	G	-0.1305	0.003	0.9368	0.942	FALSE	FALSE	FALSE	ieu-b-7	6	124516990	0.0527	468692	0.9544	Parkinson's disease || id:ieu-b-7	Parkinson's disease	Parkinson's disease || ||	TRUE	igd	NA	NA	NA	NA	NA	NA	NA	6	124516990	0.0294	9.05e-06	11786	Interleukin-4 levels	TRUE	reported	GCST90274813	textfile	2	1	TRUE	0.00166892	19.6994
Interleukin-4 levels	22	rs9270229	T	C	T	C	0.1212	-0.0003	0.1501	0.8371	FALSE	FALSE	FALSE	ieu-b-7	6	32561794	0.0269	480593	0.9909	Parkinson's disease || id:ieu-b-7	Parkinson's disease	Parkinson's disease || ||	TRUE	igd	TRUE	rs9270229	rs9270602	T	C	C	G	6	32556783	0.0255	2e-06	6252	Interleukin-4 levels	TRUE	reported	GCST90274813	textfile	2	1	TRUE	0.00360031	22.5832
Interleukin-4 levels	23	rs9425728	T	G	T	G	0.0664	0.0177	0.2727	0.2788	FALSE	FALSE	FALSE	ieu-b-7	1	173492229	0.0226	482730	0.4335	Parkinson's disease || id:ieu-b-7	Parkinson's disease	Parkinson's disease || ||	TRUE	igd	NA	NA	NA	NA	NA	NA	NA	1	173492229	0.015	9.57e-06	11345	Interleukin-4 levels	TRUE	reported	GCST90274813	textfile	2	1	TRUE	0.00172425	19.5919
Leukemia inhibitory factor receptor levels	1	rs112883732	A	G	A	G	0.0639	-0.0123	0.2266	0.2293	FALSE	FALSE	FALSE	ieu-b-7	2	174802976	0.0267	468692	0.6447	Parkinson's disease || id:ieu-b-7	Parkinson's disease	Parkinson's disease || ||	TRUE	igd	NA	NA	NA	NA	NA	NA	NA	2	174802976	0.0144	9.1e-06	11784	Leukemia inhibitory factor receptor levels	TRUE	reported	GCST90274820	textfile	2	1	TRUE	0.00166824	19.6881
Leukemia inhibitory factor receptor levels	2	rs115938660	T	C	T	C	-0.2181	0.0161	0.0215	0.0148	FALSE	FALSE	FALSE	ieu-b-7	5	110784241	0.1036	468692	0.8768	Parkinson's disease || id:ieu-b-7	Parkinson's disease	Parkinson's disease || ||	TRUE	igd	NA	NA	NA	NA	NA	NA	NA	5	110784241	0.0467	3.01e-06	11770	Leukemia inhibitory factor receptor levels	TRUE	reported	GCST90274820	textfile	2	1	TRUE	0.00184968	21.8074
Leukemia inhibitory factor receptor levels	3	rs117117000	A	G	A	G	0.1586	-0.0701	0.961	0.9627	FALSE	FALSE	FALSE	ieu-b-7	8	119917062	0.0654	468692	0.2835	Parkinson's disease || id:ieu-b-7	Parkinson's disease	Parkinson's disease || ||	TRUE	igd	NA	NA	NA	NA	NA	NA	NA	8	119917062	0.0333	1.91e-06	11784	Leukemia inhibitory factor receptor levels	TRUE	reported	GCST90274820	textfile	2	1	TRUE	0.00192128	22.6801
Leukemia inhibitory factor receptor levels	4	rs1275374	A	G	A	G	-0.0611	0.0268	0.4056	0.4051	FALSE	FALSE	FALSE	ieu-b-7	8	118638630	0.0282	13655	0.3422	Parkinson's disease || id:ieu-b-7	Parkinson's disease	Parkinson's disease || ||	TRUE	igd	NA	NA	NA	NA	NA	NA	NA	8	118638630	0.0137	8.2e-06	11336	Leukemia inhibitory factor receptor levels	TRUE	reported	GCST90274820	textfile	2	1	TRUE	0.00175154	19.8868
Leukemia inhibitory factor receptor levels	5	rs12754806	A	G	A	G	0.0563	0.0402	0.4817	0.4731	FALSE	FALSE	FALSE	ieu-b-7	1	238821453	0.0223	468692	0.0712492	Parkinson's disease || id:ieu-b-7	Parkinson's disease	Parkinson's disease || ||	TRUE	igd	NA	NA	NA	NA	NA	NA	NA	1	238821453	0.0122	3.94e-06	11768	Leukemia inhibitory factor receptor levels	TRUE	reported	GCST90274820	textfile	2	1	TRUE	0.00180638	21.2923
Leukemia inhibitory factor receptor levels	6	rs141933232	A	G	A	G	-0.2724	0.1747	0.0169	0.0154	FALSE	FALSE	FALSE	ieu-b-7	17	36964094	0.0831	480593	0.0354903	Parkinson's disease || id:ieu-b-7	Parkinson's disease	Parkinson's disease || ||	TRUE	igd	NA	NA	NA	NA	NA	NA	NA	17	36964094	0.0546	6.07e-07	11724	Leukemia inhibitory factor receptor levels	TRUE	reported	GCST90274820	textfile	2	1	TRUE	0.00211852	24.886
Leukemia inhibitory factor receptor levels	7	rs143212977	A	G	A	G	0.2467	-0.1993	0.0184	0.014	FALSE	FALSE	FALSE	ieu-b-7	12	115088443	0.1077	469486	0.06422	Parkinson's disease || id:ieu-b-7	Parkinson's disease	Parkinson's disease || ||	TRUE	igd	NA	NA	NA	NA	NA	NA	NA	12	115088443	0.0558	9.82e-06	11336	Leukemia inhibitory factor receptor levels	TRUE	reported	GCST90274820	textfile	2	1	TRUE	0.00172132	19.5431
Leukemia inhibitory factor receptor levels	8	rs147006060	A	G	A	G	-0.2602	-0.1476	0.0179	0.0126	FALSE	FALSE	FALSE	ieu-b-7	21	43780807	0.1355	25028	0.276	Parkinson's disease || id:ieu-b-7	Parkinson's disease	Parkinson's disease || ||	TRUE	igd	NA	NA	NA	NA	NA	NA	NA	21	43780807	0.0566	4.28e-06	11775	Leukemia inhibitory factor receptor levels	TRUE	reported	GCST90274820	textfile	2	1	TRUE	0.0017916	21.1304
Leukemia inhibitory factor receptor levels	9	rs1549488	C	G	C	G	-0.06	0.0059	0.4942	0.4664	FALSE	TRUE	TRUE	ieu-b-7	11	4431867	0.0221	468692	0.7898	Parkinson's disease || id:ieu-b-7	Parkinson's disease	Parkinson's disease || ||	TRUE	igd	NA	NA	NA	NA	NA	NA	NA	11	4431867	0.0134	7.55e-06	11335	Leukemia inhibitory factor receptor levels	TRUE	reported	GCST90274820	textfile	2	1	FALSE	0.00176565	20.0455
Leukemia inhibitory factor receptor levels	10	rs1604713	A	C	A	C	-0.1451	0.0167	0.9399	0.9551	FALSE	FALSE	FALSE	ieu-b-7	8	107256388	0.0577	468692	0.7719	Parkinson's disease || id:ieu-b-7	Parkinson's disease	Parkinson's disease || ||	TRUE	igd	NA	NA	NA	NA	NA	NA	NA	8	107256388	0.0322	6.6e-06	11336	Leukemia inhibitory factor receptor levels	TRUE	reported	GCST90274820	textfile	2	1	TRUE	0.00178808	20.3024
Leukemia inhibitory factor receptor levels	11	rs1690678	A	C	A	C	0.0904	-0.017	0.1109	0.1173	FALSE	FALSE	FALSE	ieu-b-7	10	27930818	0.0344	468692	0.62	Parkinson's disease || id:ieu-b-7	Parkinson's disease	Parkinson's disease || ||	TRUE	igd	NA	NA	NA	NA	NA	NA	NA	10	27930818	0.0192	2.5e-06	11784	Leukemia inhibitory factor receptor levels	TRUE	reported	GCST90274820	textfile	2	1	TRUE	0.0018777	22.1646
Leukemia inhibitory factor receptor levels	12	rs2289779	T	G	T	G	0.0788	-0.0109	0.5419	0.5437	FALSE	FALSE	FALSE	ieu-b-7	5	38527228	0.0226	468692	0.6294	Parkinson's disease || id:ieu-b-7	Parkinson's disease	Parkinson's disease || ||	TRUE	igd	NA	NA	NA	NA	NA	NA	NA	5	38527228	0.0134	4.09e-09	11336	Leukemia inhibitory factor receptor levels	TRUE	reported	GCST90274820	textfile	2	1	TRUE	0.00304131	34.5753
Leukemia inhibitory factor receptor levels	13	rs2569006	T	G	T	G	-0.0553	-0.0112	0.4142	0.3954	FALSE	FALSE	FALSE	ieu-b-7	5	145293335	0.019	482730	0.5569	Parkinson's disease || id:ieu-b-7	Parkinson's disease	Parkinson's disease || ||	TRUE	igd	TRUE	rs2569006	rs642411	T	G	T	C	5	145246085	0.0125	9.69e-06	11780	Leukemia inhibitory factor receptor levels	TRUE	reported	GCST90274820	textfile	2	1	TRUE	0.00165869	19.5685
Leukemia inhibitory factor receptor levels	14	rs41307428	T	C	T	C	0.2027	0.0344	0.067	0.0429	FALSE	FALSE	FALSE	ieu-b-7	9	136336804	0.0593	480593	0.5623	Parkinson's disease || id:ieu-b-7	Parkinson's disease	Parkinson's disease || ||	TRUE	igd	NA	NA	NA	NA	NA	NA	NA	9	136336804	0.0299	1.21e-11	11774	Leukemia inhibitory factor receptor levels	TRUE	reported	GCST90274820	textfile	2	1	TRUE	0.00388821	45.9506
Leukemia inhibitory factor receptor levels	15	rs452976	T	C	T	C	0.0692	0.0156	0.8025	0.8057	FALSE	FALSE	FALSE	ieu-b-7	5	84611579	0.0282	468692	0.579101	Parkinson's disease || id:ieu-b-7	Parkinson's disease	Parkinson's disease || ||	TRUE	igd	NA	NA	NA	NA	NA	NA	NA	5	84611579	0.0153	6.1e-06	11770	Leukemia inhibitory factor receptor levels	TRUE	reported	GCST90274820	textfile	2	1	TRUE	0.001735	20.4529
Leukemia inhibitory factor receptor levels	16	rs4689540	T	C	T	C	0.0611	0.019	0.5834	0.5649	FALSE	FALSE	FALSE	ieu-b-7	4	6753471	0.023	468692	0.4095	Parkinson's disease || id:ieu-b-7	Parkinson's disease	Parkinson's disease || ||	TRUE	igd	NA	NA	NA	NA	NA	NA	NA	4	6753471	0.0138	9.53e-06	11336	Leukemia inhibitory factor receptor levels	TRUE	reported	GCST90274820	textfile	2	1	TRUE	0.00172629	19.5996
Leukemia inhibitory factor receptor levels	17	rs4937122	T	G	T	G	0.1262	0.0091	0.9129	0.9238	FALSE	FALSE	FALSE	ieu-b-7	11	126228659	0.0365	482730	0.8037	Parkinson's disease || id:ieu-b-7	Parkinson's disease	Parkinson's disease || ||	TRUE	igd	NA	NA	NA	NA	NA	NA	NA	11	126228659	0.0248	3.61e-07	11336	Leukemia inhibitory factor receptor levels	TRUE	reported	GCST90274820	textfile	2	1	TRUE	0.00227911	25.8904
Leukemia inhibitory factor receptor levels	18	rs6002001	A	G	A	G	0.6489	0.0359	0.0043	0.0111	FALSE	FALSE	FALSE	ieu-b-7	22	41054967	0.1073	22059	0.737999	Parkinson's disease || id:ieu-b-7	Parkinson's disease	Parkinson's disease || ||	TRUE	igd	NA	NA	NA	NA	NA	NA	NA	22	41054967	0.1417	4.66e-06	6861	Leukemia inhibitory factor receptor levels	TRUE	reported	GCST90274820	textfile	2	1	TRUE	0.00304721	20.9647
Leukemia inhibitory factor receptor levels	19	rs62258077	T	C	T	C	-0.063	-0.0623	0.6603	0.6104	FALSE	FALSE	FALSE	ieu-b-7	3	58363371	0.0174	482730	0.000340698	Parkinson's disease || id:ieu-b-7	Parkinson's disease	Parkinson's disease || ||	TRUE	igd	NA	NA	NA	NA	NA	NA	NA	3	58363371	0.013	1.26e-06	11762	Leukemia inhibitory factor receptor levels	TRUE	reported	GCST90274820	textfile	2	1	TRUE	0.00199272	23.4812
Leukemia inhibitory factor receptor levels	20	rs6671847	A	G	A	G	-0.0604	0.0607	0.4812	0.4753	FALSE	FALSE	FALSE	ieu-b-7	1	161478810	0.0178	480593	0.000657506	Parkinson's disease || id:ieu-b-7	Parkinson's disease	Parkinson's disease || ||	TRUE	igd	NA	NA	NA	NA	NA	NA	NA	1	161478810	0.0135	7.67e-06	11336	Leukemia inhibitory factor receptor levels	TRUE	reported	GCST90274820	textfile	2	1	TRUE	0.00176271	20.0138
Leukemia inhibitory factor receptor levels	21	rs7047277	T	C	T	C	0.0558	0.0424	0.6218	0.581	FALSE	FALSE	FALSE	ieu-b-7	9	14709151	0.0203	482730	0.0368002	Parkinson's disease || id:ieu-b-7	Parkinson's disease	Parkinson's disease || ||	TRUE	igd	TRUE	rs7047277	rs10961677	C	T	C	T	9	14698077	0.0126	9.49e-06	11774	Leukemia inhibitory factor receptor levels	TRUE	reported	GCST90274820	textfile	2	1	TRUE	0.00166295	19.6089
Leukemia inhibitory factor receptor levels	22	rs72730728	A	T	A	T	0.1414	0.0144	0.9403	0.9516	FALSE	TRUE	FALSE	ieu-b-7	5	36424241	0.0582	468692	0.805	Parkinson's disease || id:ieu-b-7	Parkinson's disease	Parkinson's disease || ||	TRUE	igd	NA	NA	NA	NA	NA	NA	NA	5	36424241	0.0302	2.84e-06	11336	Leukemia inhibitory factor receptor levels	TRUE	reported	GCST90274820	textfile	2	1	TRUE	0.00193013	21.9184
Leukemia inhibitory factor receptor levels	23	rs72837682	T	C	T	C	-0.08	-0.026	0.7807	0.8006	FALSE	FALSE	FALSE	ieu-b-7	17	7063650	0.026	482730	0.3188	Parkinson's disease || id:ieu-b-7	Parkinson's disease	Parkinson's disease || ||	TRUE	igd	NA	NA	NA	NA	NA	NA	NA	17	7063650	0.0172	3.3e-06	11336	Leukemia inhibitory factor receptor levels	TRUE	reported	GCST90274820	textfile	2	1	TRUE	0.00190474	21.6295
Leukemia inhibitory factor receptor levels	24	rs73157388	T	C	T	C	-0.1306	-0.0138	0.9229	0.9395	FALSE	FALSE	FALSE	ieu-b-7	7	79349730	0.0521	468692	0.7916	Parkinson's disease || id:ieu-b-7	Parkinson's disease	Parkinson's disease || ||	TRUE	igd	NA	NA	NA	NA	NA	NA	NA	7	79349730	0.0285	4.6e-06	11336	Leukemia inhibitory factor receptor levels	TRUE	reported	GCST90274820	textfile	2	1	TRUE	0.00184898	20.9952
Leukemia inhibitory factor receptor levels	25	rs78981063	A	G	A	G	-0.1377	-0.0821	0.9558	0.9592	FALSE	FALSE	FALSE	ieu-b-7	2	84195883	0.0488	482730	0.0929994	Parkinson's disease || id:ieu-b-7	Parkinson's disease	Parkinson's disease || ||	TRUE	igd	NA	NA	NA	NA	NA	NA	NA	2	84195883	0.0302	5.13e-06	11784	Leukemia inhibitory factor receptor levels	TRUE	reported	GCST90274820	textfile	2	1	TRUE	0.00176115	20.7864
Leukemia inhibitory factor receptor levels	26	rs9313148	C	G	C	G	-0.0824	-0.0132	0.1414	0.1475	FALSE	TRUE	FALSE	ieu-b-7	5	6378192	0.032	468692	0.6801	Parkinson's disease || id:ieu-b-7	Parkinson's disease	Parkinson's disease || ||	TRUE	igd	NA	NA	NA	NA	NA	NA	NA	5	6378192	0.0173	1.91e-06	11777	Leukemia inhibitory factor receptor levels	TRUE	reported	GCST90274820	textfile	2	1	TRUE	0.00192261	22.6824
TNF-beta levels	1	rs10282173	A	C	A	C	-0.1516	0.0389	0.0412	0.0382	FALSE	FALSE	FALSE	ieu-b-7	7	38651934	0.0588	468692	0.5081	Parkinson's disease || id:ieu-b-7	Parkinson's disease	Parkinson's disease || ||	TRUE	igd	NA	NA	NA	NA	NA	NA	NA	7	38651934	0.034	8.24e-06	11792	TNF-beta levels	TRUE	reported	GCST90274840	textfile	2	1	TRUE	0.00168314	19.8777
TNF-beta levels	2	rs10740467	A	C	A	C	-0.0628	-0.0209	0.4585	0.4449	FALSE	FALSE	FALSE	ieu-b-7	10	79176594	0.0274	13655	0.4449	Parkinson's disease || id:ieu-b-7	Parkinson's disease	Parkinson's disease || ||	TRUE	igd	NA	NA	NA	NA	NA	NA	NA	10	79176594	0.014	7.27e-06	11344	TNF-beta levels	TRUE	reported	GCST90274840	textfile	2	1	TRUE	0.00177063	20.1181
TNF-beta levels	3	rs112317147	T	C	T	C	-0.1441	0.0114	0.0534	0.0539	FALSE	FALSE	FALSE	ieu-b-7	2	119783156	0.0524	468692	0.8274	Parkinson's disease || id:ieu-b-7	Parkinson's disease	Parkinson's disease || ||	TRUE	igd	NA	NA	NA	NA	NA	NA	NA	2	119783156	0.0309	3.11e-06	11344	TNF-beta levels	TRUE	reported	GCST90274840	textfile	2	1	TRUE	0.00191343	21.7437
TNF-beta levels	4	rs112983129	T	C	T	C	-0.1854	0.0628	0.0343	0.0321	FALSE	FALSE	FALSE	ieu-b-7	16	11519052	0.0649	468692	0.3334	Parkinson's disease || id:ieu-b-7	Parkinson's disease	Parkinson's disease || ||	TRUE	igd	NA	NA	NA	NA	NA	NA	NA	16	11519052	0.0409	5.81e-06	11768	TNF-beta levels	TRUE	reported	GCST90274840	textfile	2	1	TRUE	0.00174306	20.5447
TNF-beta levels	5	rs113244922	T	C	T	C	0.2324	-0.1675	0.0237	0.0252	FALSE	FALSE	FALSE	ieu-b-7	4	35497008	0.0784	468692	0.0326099	Parkinson's disease || id:ieu-b-7	Parkinson's disease	Parkinson's disease || ||	TRUE	igd	NA	NA	NA	NA	NA	NA	NA	4	35497008	0.0499	3.2e-06	10470	TNF-beta levels	TRUE	reported	GCST90274840	textfile	2	1	TRUE	0.00206741	21.6864
TNF-beta levels	6	rs113664581	A	G	A	G	0.1631	0.1148	0.9568	0.9677	FALSE	FALSE	FALSE	ieu-b-7	1	162563922	0.0803	468692	0.1531	Parkinson's disease || id:ieu-b-7	Parkinson's disease	Parkinson's disease || ||	TRUE	igd	TRUE	rs113664581	rs111478266	G	A	G	A	1	162552552	0.0367	8.82e-06	11771	TNF-beta levels	TRUE	reported	GCST90274840	textfile	2	1	TRUE	0.00167508	19.747
TNF-beta levels	7	rs113800750	A	G	A	G	0.3221	-0.2439	0.0171	0.0089	FALSE	FALSE	FALSE	ieu-b-7	18	22513834	0.2145	11518	0.2555	Parkinson's disease || id:ieu-b-7	Parkinson's disease	Parkinson's disease || ||	TRUE	igd	TRUE	rs113800750	rs117284728	A	G	C	T	18	22485775	0.071	5.72e-06	8817	TNF-beta levels	TRUE	reported	GCST90274840	textfile	2	1	TRUE	0.0023288	20.5763
TNF-beta levels	8	rs114250919	T	C	T	C	0.2469	-0.0077	0.9743	0.9809	FALSE	FALSE	FALSE	ieu-b-7	5	21093728	0.0993	468692	0.9381	Parkinson's disease || id:ieu-b-7	Parkinson's disease	Parkinson's disease || ||	TRUE	igd	NA	NA	NA	NA	NA	NA	NA	5	21093728	0.049	4.69e-07	11305	TNF-beta levels	TRUE	reported	GCST90274840	textfile	2	1	TRUE	0.00224081	25.3848
TNF-beta levels	9	rs118033381	T	C	T	C	-0.197	-0.13	0.0273	0.0243	FALSE	FALSE	FALSE	ieu-b-7	10	71320318	0.08	470219	0.1041	Parkinson's disease || id:ieu-b-7	Parkinson's disease	Parkinson's disease || ||	TRUE	igd	NA	NA	NA	NA	NA	NA	NA	10	71320318	0.0441	7.93e-06	11785	TNF-beta levels	TRUE	reported	GCST90274840	textfile	2	1	TRUE	0.00169041	19.9518
TNF-beta levels	10	rs12743015	C	G	C	G	-0.1918	-0.0617	0.029	0.0273	FALSE	TRUE	FALSE	ieu-b-7	1	110256931	0.0628	482730	0.3258	Parkinson's disease || id:ieu-b-7	Parkinson's disease	Parkinson's disease || ||	TRUE	igd	NA	NA	NA	NA	NA	NA	NA	1	110256931	0.0403	1.94e-06	11784	TNF-beta levels	TRUE	reported	GCST90274840	textfile	2	1	TRUE	0.00191849	22.6471
TNF-beta levels	11	rs12883833	A	G	A	G	-0.1252	0.0028	0.0934	0.0825	FALSE	FALSE	FALSE	ieu-b-7	14	34898218	0.0401	468692	0.9446	Parkinson's disease || id:ieu-b-7	Parkinson's disease	Parkinson's disease || ||	TRUE	igd	TRUE	rs12883833	rs56728642	A	G	T	G	14	34880659	0.0259	1.34e-06	9259	TNF-beta levels	TRUE	reported	GCST90274840	textfile	2	1	TRUE	0.00251739	23.3623
TNF-beta levels	12	rs1382846	A	G	A	G	-0.1213	-0.0792	0.0655	0.059	FALSE	FALSE	FALSE	ieu-b-7	3	151804807	0.0498	468692	0.1117	Parkinson's disease || id:ieu-b-7	Parkinson's disease	Parkinson's disease || ||	TRUE	igd	NA	NA	NA	NA	NA	NA	NA	3	151804807	0.0274	9.55e-06	11792	TNF-beta levels	TRUE	reported	GCST90274840	textfile	2	1	TRUE	0.00165925	19.5951
TNF-beta levels	13	rs138471526	T	C	T	C	-0.3418	0.2364	0.0137	0.0103	FALSE	FALSE	FALSE	ieu-b-7	11	72666063	0.128	465676	0.0647799	Parkinson's disease || id:ieu-b-7	Parkinson's disease	Parkinson's disease || ||	TRUE	igd	NA	NA	NA	NA	NA	NA	NA	11	72666063	0.0735	3.31e-06	9983	TNF-beta levels	TRUE	reported	GCST90274840	textfile	2	1	TRUE	0.00216157	21.6213
TNF-beta levels	14	rs139832280	A	T	A	T	-0.4149	-0.3374	0.9923	0.9942	FALSE	TRUE	FALSE	ieu-b-7	4	71720357	0.2949	10639	0.2525	Parkinson's disease || id:ieu-b-7	Parkinson's disease	Parkinson's disease || ||	TRUE	igd	NA	NA	NA	NA	NA	NA	NA	4	71720357	0.0939	9.94e-06	9983	TNF-beta levels	TRUE	reported	GCST90274840	textfile	2	1	TRUE	0.00195185	19.5195
TNF-beta levels	15	rs140622233	T	G	T	G	0.2762	-0.1948	0.9813	0.9847	FALSE	FALSE	FALSE	ieu-b-7	2	113468006	0.1042	468692	0.0615602	Parkinson's disease || id:ieu-b-7	Parkinson's disease	Parkinson's disease || ||	TRUE	igd	NA	NA	NA	NA	NA	NA	NA	2	113468006	0.0622	8.97e-06	9983	TNF-beta levels	TRUE	reported	GCST90274840	textfile	2	1	TRUE	0.00197128	19.7142
TNF-beta levels	16	rs143019966	T	C	T	C	0.2122	0.0113	0.9751	0.9782	FALSE	FALSE	FALSE	ieu-b-7	13	47656376	0.0783	468692	0.8855	Parkinson's disease || id:ieu-b-7	Parkinson's disease	Parkinson's disease || ||	TRUE	igd	NA	NA	NA	NA	NA	NA	NA	13	47656376	0.0451	2.54e-06	10913	TNF-beta levels	TRUE	reported	GCST90274840	textfile	2	1	TRUE	0.00202448	22.1339
TNF-beta levels	17	rs145415430	A	T	A	T	0.2755	-0.1576	0.0148	0.0113	FALSE	TRUE	FALSE	ieu-b-7	11	84197834	0.1532	14183	0.3037	Parkinson's disease || id:ieu-b-7	Parkinson's disease	Parkinson's disease || ||	TRUE	igd	NA	NA	NA	NA	NA	NA	NA	11	84197834	0.0615	7.48e-06	11344	TNF-beta levels	TRUE	reported	GCST90274840	textfile	2	1	TRUE	0.00176587	20.0639
TNF-beta levels	18	rs147423408	A	G	A	G	0.1732	0.0733	0.0415	0.0442	FALSE	FALSE	FALSE	ieu-b-7	12	52132524	0.0586	468692	0.2108	Parkinson's disease || id:ieu-b-7	Parkinson's disease	Parkinson's disease || ||	TRUE	igd	NA	NA	NA	NA	NA	NA	NA	12	52132524	0.035	7.48e-07	11344	TNF-beta levels	TRUE	reported	GCST90274840	textfile	2	1	TRUE	0.00215406	24.484
TNF-beta levels	19	rs16852556	T	C	T	C	0.1514	0.0692	0.0511	0.0583	FALSE	FALSE	FALSE	ieu-b-7	2	215575422	0.0571	15976	0.2254	Parkinson's disease || id:ieu-b-7	Parkinson's disease	Parkinson's disease || ||	TRUE	igd	NA	NA	NA	NA	NA	NA	NA	2	215575422	0.0317	1.79e-06	11344	TNF-beta levels	TRUE	reported	GCST90274840	textfile	2	1	TRUE	0.00200676	22.8064
TNF-beta levels	20	rs189767513	A	G	A	G	-0.3355	0.0472	0.0119	0.0101	FALSE	FALSE	FALSE	ieu-b-7	19	10721256	0.1014	480593	0.641599	Parkinson's disease || id:ieu-b-7	Parkinson's disease	Parkinson's disease || ||	TRUE	igd	NA	NA	NA	NA	NA	NA	NA	19	10721256	0.0752	8.14e-06	9683	TNF-beta levels	TRUE	reported	GCST90274840	textfile	2	1	TRUE	0.00205139	19.9003
TNF-beta levels	21	rs192303297	T	C	T	C	-0.3872	-0.0308	0.0118	0.0189	FALSE	FALSE	FALSE	ieu-b-7	3	141634940	0.1383	10639	0.8237	Parkinson's disease || id:ieu-b-7	Parkinson's disease	Parkinson's disease || ||	TRUE	igd	NA	NA	NA	NA	NA	NA	NA	3	141634940	0.0842	4.25e-06	7843	TNF-beta levels	TRUE	reported	GCST90274840	textfile	2	1	TRUE	0.00268903	21.1415
TNF-beta levels	22	rs192303297	T	C	T	C	-0.3872	-0.0308	0.0118	0.0189	FALSE	FALSE	FALSE	ieu-b-7	3	141634940	0.1383	10639	0.8237	Parkinson's disease || id:ieu-b-7	Parkinson's disease	Parkinson's disease || ||	TRUE	igd	NA	NA	NA	NA	NA	NA	NA	3	141634940	0.0842	4.25e-06	7843	TNF-beta levels	TRUE	reported	GCST90274840	textfile	2	2	TRUE	0.00268903	21.1415
TNF-beta levels	23	rs192303297	T	C	T	C	-0.3872	-0.0308	0.0118	0.0189	FALSE	FALSE	FALSE	ieu-b-7	3	141634940	0.1383	10639	0.8237	Parkinson's disease || id:ieu-b-7	Parkinson's disease	Parkinson's disease || ||	TRUE	igd	NA	NA	NA	NA	NA	NA	NA	3	141634940	0.0842	4.25e-06	7843	TNF-beta levels	TRUE	reported	GCST90274840	textfile	2	3	TRUE	0.00268903	21.1415
TNF-beta levels	24	rs2074475	T	C	T	C	0.2308	-0.1485	0.9618	0.9777	FALSE	FALSE	FALSE	ieu-b-7	6	30204272	0.0718	480593	0.0386296	Parkinson's disease || id:ieu-b-7	Parkinson's disease	Parkinson's disease || ||	TRUE	igd	TRUE	rs2074475	rs7764380	C	T	T	C	6	30137890	0.0421	4.2e-08	11792	TNF-beta levels	TRUE	reported	GCST90274840	textfile	2	1	TRUE	0.00254223	30.0493
TNF-beta levels	25	rs2364485	A	C	A	C	0.1759	0.0222	0.1645	0.1772	FALSE	FALSE	FALSE	ieu-b-7	12	6514963	0.0339	25556	0.513701	Parkinson's disease || id:ieu-b-7	Parkinson's disease	Parkinson's disease || ||	TRUE	igd	NA	NA	NA	NA	NA	NA	NA	12	6514963	0.0189	1.32e-20	11344	TNF-beta levels	TRUE	reported	GCST90274840	textfile	2	1	TRUE	0.00757772	86.6027
TNF-beta levels	26	rs247096	T	C	T	C	-0.0691	-0.0187	0.6986	0.7139	FALSE	FALSE	FALSE	ieu-b-7	5	128093877	0.0206	482730	0.3654	Parkinson's disease || id:ieu-b-7	Parkinson's disease	Parkinson's disease || ||	TRUE	igd	NA	NA	NA	NA	NA	NA	NA	5	128093877	0.0152	5.47e-06	10296	TNF-beta levels	TRUE	reported	GCST90274840	textfile	2	1	TRUE	0.00200322	20.6626
TNF-beta levels	27	rs2523882	T	C	T	C	-0.1991	-0.0154	0.2883	0.3331	FALSE	FALSE	FALSE	ieu-b-7	6	31042217	0.0193	480593	0.4234	Parkinson's disease || id:ieu-b-7	Parkinson's disease	Parkinson's disease || ||	TRUE	igd	NA	NA	NA	NA	NA	NA	NA	6	31042217	0.0144	1.77e-43	11792	TNF-beta levels	TRUE	reported	GCST90274840	textfile	2	1	TRUE	0.0159531	191.137
TNF-beta levels	28	rs28700215	T	C	T	C	-0.0626	0.014	0.5824	0.578	FALSE	FALSE	FALSE	ieu-b-7	15	100064767	0.0203	482730	0.490801	Parkinson's disease || id:ieu-b-7	Parkinson's disease	Parkinson's disease || ||	TRUE	igd	NA	NA	NA	NA	NA	NA	NA	15	100064767	0.0136	4.17e-06	11344	TNF-beta levels	TRUE	reported	GCST90274840	textfile	2	1	TRUE	0.00186421	21.1833
TNF-beta levels	29	rs2904602	A	G	A	G	-0.625	-0.0574	0.1165	0.124	FALSE	FALSE	FALSE	ieu-b-7	6	31474280	0.0285	480593	0.0438097	Parkinson's disease || id:ieu-b-7	Parkinson's disease	Parkinson's disease || ||	TRUE	igd	TRUE	rs2904602	rs2242955	A	G	A	G	6	31451847	0.0196	1e-200	11791	TNF-beta levels	TRUE	reported	GCST90274840	textfile	2	1	TRUE	0.0793912	1016.66
TNF-beta levels	30	rs542608643	T	C	T	C	-0.3554	-0.094	0.0294	0.0269	FALSE	FALSE	FALSE	ieu-b-7	6	31834197	0.0538	480593	0.0803397	Parkinson's disease || id:ieu-b-7	Parkinson's disease	Parkinson's disease || ||	TRUE	igd	TRUE	rs542608643	rs4947332	T	C	T	C	6	31821910	0.0467	2.74e-14	8387	TNF-beta levels	TRUE	reported	GCST90274840	textfile	2	1	TRUE	0.00685813	57.9025
TNF-beta levels	31	rs55914821	A	G	A	G	0.0748	0.0411	0.7583	0.7728	FALSE	FALSE	FALSE	ieu-b-7	17	65264208	0.0226	482730	0.0695505	Parkinson's disease || id:ieu-b-7	Parkinson's disease	Parkinson's disease || ||	TRUE	igd	NA	NA	NA	NA	NA	NA	NA	17	65264208	0.0159	2.55e-06	11344	TNF-beta levels	TRUE	reported	GCST90274840	textfile	2	1	TRUE	0.00194714	22.1275
TNF-beta levels	32	rs576053233	T	G	T	G	-0.4986	-0.1798	0.007	0.0063	FALSE	FALSE	FALSE	ieu-b-7	5	101199830	0.3176	9346	0.5713	Parkinson's disease || id:ieu-b-7	Parkinson's disease	Parkinson's disease || ||	TRUE	igd	NA	NA	NA	NA	NA	NA	NA	5	101199830	0.1116	7.9e-06	9339	TNF-beta levels	TRUE	reported	GCST90274840	textfile	2	1	TRUE	0.00213279	19.9564
TNF-beta levels	33	rs58634322	T	C	T	C	-0.1011	-0.0457	0.8961	0.8916	FALSE	FALSE	FALSE	ieu-b-7	2	12848518	0.0367	468692	0.2123	Parkinson's disease || id:ieu-b-7	Parkinson's disease	Parkinson's disease || ||	TRUE	igd	NA	NA	NA	NA	NA	NA	NA	2	12848518	0.0226	7.7e-06	11344	TNF-beta levels	TRUE	reported	GCST90274840	textfile	2	1	TRUE	0.00176098	20.0082
TNF-beta levels	34	rs7210455	T	C	T	C	0.1349	-0.0932	0.0564	0.0421	FALSE	FALSE	FALSE	ieu-b-7	17	2295118	0.0562	468692	0.0974698	Parkinson's disease || id:ieu-b-7	Parkinson's disease	Parkinson's disease || ||	TRUE	igd	NA	NA	NA	NA	NA	NA	NA	17	2295118	0.0304	9.1e-06	11790	TNF-beta levels	TRUE	reported	GCST90274840	textfile	2	1	TRUE	0.00166739	19.6881
TNF-beta levels	35	rs72854560	C	G	C	G	-0.2968	-0.1222	0.0156	0.0142	FALSE	TRUE	FALSE	ieu-b-7	6	28404463	0.0875	482730	0.1627	Parkinson's disease || id:ieu-b-7	Parkinson's disease	Parkinson's disease || ||	TRUE	igd	NA	NA	NA	NA	NA	NA	NA	6	28404463	0.0602	8.21e-07	11344	TNF-beta levels	TRUE	reported	GCST90274840	textfile	2	1	TRUE	0.00213815	24.3029
TNF-beta levels	36	rs7310615	C	G	C	G	0.1356	0.0037	0.4758	0.4841	FALSE	TRUE	TRUE	ieu-b-7	12	111865049	0.0172	482730	0.8311	Parkinson's disease || id:ieu-b-7	Parkinson's disease	Parkinson's disease || ||	TRUE	igd	NA	NA	NA	NA	NA	NA	NA	12	111865049	0.0134	4.53e-24	11344	TNF-beta levels	TRUE	reported	GCST90274840	textfile	2	1	FALSE	0.00894624	102.384
TNF-beta levels	37	rs74363807	T	C	T	C	0.2496	0.0361	0.0218	0.0127	FALSE	FALSE	FALSE	ieu-b-7	7	46566236	0.1114	468692	0.746	Parkinson's disease || id:ieu-b-7	Parkinson's disease	Parkinson's disease || ||	TRUE	igd	NA	NA	NA	NA	NA	NA	NA	7	46566236	0.0532	2.71e-06	11344	TNF-beta levels	TRUE	reported	GCST90274840	textfile	2	1	TRUE	0.00193668	22.0084
TNF-beta levels	38	rs7583622	A	G	A	G	0.0748	-0.0186	0.2098	0.206	FALSE	FALSE	FALSE	ieu-b-7	2	53931190	0.0216	482730	0.3879	Parkinson's disease || id:ieu-b-7	Parkinson's disease	Parkinson's disease || ||	TRUE	igd	NA	NA	NA	NA	NA	NA	NA	2	53931190	0.0161	3.38e-06	11769	TNF-beta levels	TRUE	reported	GCST90274840	textfile	2	1	TRUE	0.0018307	21.5813
TNF-beta levels	39	rs76481949	A	G	A	G	0.1152	0.0981	0.923	0.9174	FALSE	FALSE	FALSE	ieu-b-7	18	39700979	0.0423	468692	0.0205201	Parkinson's disease || id:ieu-b-7	Parkinson's disease	Parkinson's disease || ||	TRUE	igd	NA	NA	NA	NA	NA	NA	NA	18	39700979	0.0254	5.75e-06	11344	TNF-beta levels	TRUE	reported	GCST90274840	textfile	2	1	TRUE	0.00181002	20.5665
TNF-beta levels	40	rs76913603	A	G	A	G	-0.1741	-0.0575	0.967	0.9659	FALSE	FALSE	FALSE	ieu-b-7	5	167809091	0.0645	468692	0.373	Parkinson's disease || id:ieu-b-7	Parkinson's disease	Parkinson's disease || ||	TRUE	igd	NA	NA	NA	NA	NA	NA	NA	5	167809091	0.0379	4.36e-06	11782	TNF-beta levels	TRUE	reported	GCST90274840	textfile	2	1	TRUE	0.00178782	21.0982
TNF-beta levels	41	rs77897196	T	C	T	C	-0.1917	-0.0518	0.9711	0.9675	FALSE	FALSE	FALSE	ieu-b-7	1	63459761	0.0583	482730	0.3742	Parkinson's disease || id:ieu-b-7	Parkinson's disease	Parkinson's disease || ||	TRUE	igd	NA	NA	NA	NA	NA	NA	NA	1	63459761	0.041	2.93e-06	11792	TNF-beta levels	TRUE	reported	GCST90274840	textfile	2	1	TRUE	0.00185048	21.8576
TNF-beta levels	42	rs78051721	A	G	A	G	-0.2581	0.0157	0.0172	0.0164	FALSE	FALSE	FALSE	ieu-b-7	17	1829809	0.094	468692	0.8674	Parkinson's disease || id:ieu-b-7	Parkinson's disease	Parkinson's disease || ||	TRUE	igd	NA	NA	NA	NA	NA	NA	NA	17	1829809	0.0578	7.99e-06	10913	TNF-beta levels	TRUE	reported	GCST90274840	textfile	2	1	TRUE	0.00182383	19.9361
TNF-beta levels	43	rs8098045	A	T	A	T	0.0894	-0.0419	0.1285	0.1192	FALSE	TRUE	FALSE	ieu-b-7	18	62141503	0.0349	468692	0.2301	Parkinson's disease || id:ieu-b-7	Parkinson's disease	Parkinson's disease || ||	TRUE	igd	NA	NA	NA	NA	NA	NA	NA	18	62141503	0.0197	5.68e-06	11783	TNF-beta levels	TRUE	reported	GCST90274840	textfile	2	1	TRUE	0.00174473	20.5906
TNF-beta levels	44	rs9267798	C	G	C	G	-0.1199	-0.0008	0.0834	0.0779	FALSE	TRUE	FALSE	ieu-b-7	6	32044834	0.033	480593	0.9816	Parkinson's disease || id:ieu-b-7	Parkinson's disease	Parkinson's disease || ||	TRUE	igd	NA	NA	NA	NA	NA	NA	NA	6	32044834	0.0238	4.71e-07	11792	TNF-beta levels	TRUE	reported	GCST90274840	textfile	2	1	TRUE	0.00214765	25.3753
Cystatin D levels	1	rs10065995	T	C	T	C	-0.0536	-0.0014	0.6595	0.6551	FALSE	FALSE	FALSE	ieu-b-7	5	10215009	0.0237	468692	0.9532	Parkinson's disease || id:ieu-b-7	Parkinson's disease	Parkinson's disease || ||	TRUE	igd	NA	NA	NA	NA	NA	NA	NA	5	10215009	0.0121	9.43e-06	14723	Cystatin D levels	TRUE	reported	GCST90274777	textfile	2	1	TRUE	0.00133102	19.62
Cystatin D levels	2	rs10870035	A	C	A	C	0.088	0.0349	0.1202	0.1229	FALSE	FALSE	FALSE	ieu-b-7	9	80693494	0.0338	468692	0.3024	Parkinson's disease || id:ieu-b-7	Parkinson's disease	Parkinson's disease || ||	TRUE	igd	TRUE	rs10870035	rs11145672	A	C	G	C	9	80691850	0.0193	5.13e-06	12404	Cystatin D levels	TRUE	reported	GCST90274777	textfile	2	1	TRUE	0.00167325	20.7865
Cystatin D levels	3	rs11054069	T	C	T	C	0.1674	-0.0114	0.7421	0.7605	FALSE	FALSE	FALSE	ieu-b-7	12	11058117	0.0207	480593	0.5817	Parkinson's disease || id:ieu-b-7	Parkinson's disease	Parkinson's disease || ||	TRUE	igd	NA	NA	NA	NA	NA	NA	NA	12	11058117	0.013	6.07e-38	14724	Cystatin D levels	TRUE	reported	GCST90274777	textfile	2	1	TRUE	0.0111361	165.793
Cystatin D levels	4	rs111613686	A	G	A	G	-0.2439	0.0733	0.0187	0.0157	FALSE	FALSE	FALSE	ieu-b-7	7	5003387	0.0965	468692	0.4474	Parkinson's disease || id:ieu-b-7	Parkinson's disease	Parkinson's disease || ||	TRUE	igd	NA	NA	NA	NA	NA	NA	NA	7	5003387	0.0537	5.57e-06	13801	Cystatin D levels	TRUE	reported	GCST90274777	textfile	2	1	TRUE	0.00149251	20.6259
Cystatin D levels	5	rs112961631	T	C	T	C	0.5656	-0.1067	0.0233	0.0129	FALSE	FALSE	FALSE	ieu-b-7	20	23929099	0.1165	468692	0.3595	Parkinson's disease || id:ieu-b-7	Parkinson's disease	Parkinson's disease || ||	TRUE	igd	NA	NA	NA	NA	NA	NA	NA	20	23929099	0.0476	1.46e-32	12148	Cystatin D levels	TRUE	reported	GCST90274777	textfile	2	1	TRUE	0.011489	141.167
Cystatin D levels	6	rs12294339	T	C	T	C	0.0702	0.03	0.3671	0.3664	FALSE	FALSE	FALSE	ieu-b-7	11	34860199	0.0198	482730	0.1285	Parkinson's disease || id:ieu-b-7	Parkinson's disease	Parkinson's disease || ||	TRUE	igd	NA	NA	NA	NA	NA	NA	NA	11	34860199	0.0118	2.7e-09	14726	Cystatin D levels	TRUE	reported	GCST90274777	textfile	2	1	TRUE	0.00239763	35.3876
Cystatin D levels	7	rs12924891	T	C	T	C	0.2573	-0.0097	0.0141	0.0132	FALSE	FALSE	FALSE	ieu-b-7	16	66817975	0.0959	481851	0.9192	Parkinson's disease || id:ieu-b-7	Parkinson's disease	Parkinson's disease || ||	TRUE	igd	NA	NA	NA	NA	NA	NA	NA	16	66817975	0.0571	6.6e-06	13422	Cystatin D levels	TRUE	reported	GCST90274777	textfile	2	1	TRUE	0.00151054	20.3022
Cystatin D levels	8	rs13127297	A	G	A	G	0.0545	-0.0284	0.4095	0.441	FALSE	FALSE	FALSE	ieu-b-7	4	23899510	0.0225	468692	0.206	Parkinson's disease || id:ieu-b-7	Parkinson's disease	Parkinson's disease || ||	TRUE	igd	NA	NA	NA	NA	NA	NA	NA	4	23899510	0.0117	3.19e-06	14730	Cystatin D levels	TRUE	reported	GCST90274777	textfile	2	1	TRUE	0.00147089	21.6951
Cystatin D levels	9	rs13397003	T	G	T	G	0.0701	-0.0434	0.7748	0.7711	FALSE	FALSE	FALSE	ieu-b-7	2	62640887	0.0274	468692	0.1125	Parkinson's disease || id:ieu-b-7	Parkinson's disease	Parkinson's disease || ||	TRUE	igd	NA	NA	NA	NA	NA	NA	NA	2	62640887	0.0141	6.64e-07	14732	Cystatin D levels	TRUE	reported	GCST90274777	textfile	2	1	TRUE	0.00167497	24.7138
Cystatin D levels	10	rs138248604	A	G	A	G	0.2257	-0.0071	0.0336	0.0205	FALSE	FALSE	FALSE	ieu-b-7	2	173718684	0.1438	11518	0.9609	Parkinson's disease || id:ieu-b-7	Parkinson's disease	Parkinson's disease || ||	TRUE	igd	NA	NA	NA	NA	NA	NA	NA	2	173718684	0.0508	8.87e-06	14731	Cystatin D levels	TRUE	reported	GCST90274777	textfile	2	1	TRUE	0.0013382	19.7368
Cystatin D levels	11	rs139918398	T	C	T	C	0.3373	0.1176	0.0111	0.0119	FALSE	FALSE	FALSE	ieu-b-7	5	96079646	0.1537	13045	0.4443	Parkinson's disease || id:ieu-b-7	Parkinson's disease	Parkinson's disease || ||	TRUE	igd	NA	NA	NA	NA	NA	NA	NA	5	96079646	0.0676	6.05e-07	13457	Cystatin D levels	TRUE	reported	GCST90274777	textfile	2	1	TRUE	0.00184667	24.8929
Cystatin D levels	12	rs140505821	A	G	A	G	0.3276	0.3061	0.0089	0.0081	FALSE	FALSE	FALSE	ieu-b-7	11	21963583	0.1984	11518	0.1229	Parkinson's disease || id:ieu-b-7	Parkinson's disease	Parkinson's disease || ||	TRUE	igd	NA	NA	NA	NA	NA	NA	NA	11	21963583	0.0691	2.13e-06	13381	Cystatin D levels	TRUE	reported	GCST90274777	textfile	2	1	TRUE	0.00167693	22.4733
Cystatin D levels	13	rs141179525	T	C	T	C	-0.2583	-0.0095	0.9784	0.9782	FALSE	FALSE	FALSE	ieu-b-7	20	24071731	0.0809	468692	0.9062	Parkinson's disease || id:ieu-b-7	Parkinson's disease	Parkinson's disease || ||	TRUE	igd	NA	NA	NA	NA	NA	NA	NA	20	24071731	0.0447	7.54e-09	14735	Cystatin D levels	TRUE	reported	GCST90274777	textfile	2	1	TRUE	0.002261	33.3868
Cystatin D levels	14	rs141192864	T	C	T	C	0.1016	0.019	0.0812	0.073	FALSE	FALSE	FALSE	ieu-b-7	12	31381343	0.0432	468692	0.660601	Parkinson's disease || id:ieu-b-7	Parkinson's disease	Parkinson's disease || ||	TRUE	igd	NA	NA	NA	NA	NA	NA	NA	12	31381343	0.0213	1.84e-06	14728	Cystatin D levels	TRUE	reported	GCST90274777	textfile	2	1	TRUE	0.00154246	22.7494
Cystatin D levels	15	rs145343977	T	C	T	C	0.2679	-0.1721	0.0156	0.017	FALSE	FALSE	FALSE	ieu-b-7	11	97836152	0.1257	13655	0.1709	Parkinson's disease || id:ieu-b-7	Parkinson's disease	Parkinson's disease || ||	TRUE	igd	NA	NA	NA	NA	NA	NA	NA	11	97836152	0.0597	7.21e-06	14288	Cystatin D levels	TRUE	reported	GCST90274777	textfile	2	1	TRUE	0.00140739	20.1343
Cystatin D levels	16	rs145735210	T	C	T	C	0.2031	0.2432	0.0213	0.0162	FALSE	FALSE	FALSE	ieu-b-7	4	22724745	0.0914	468692	0.00778001	Parkinson's disease || id:ieu-b-7	Parkinson's disease	Parkinson's disease || ||	TRUE	igd	NA	NA	NA	NA	NA	NA	NA	4	22724745	0.0454	7.69e-06	14242	Cystatin D levels	TRUE	reported	GCST90274777	textfile	2	1	TRUE	0.00140323	20.01
Cystatin D levels	17	rs1477229	T	C	T	C	-0.0612	0.0101	0.2323	0.2356	FALSE	FALSE	FALSE	ieu-b-7	7	131455573	0.0271	468692	0.7097	Parkinson's disease || id:ieu-b-7	Parkinson's disease	Parkinson's disease || ||	TRUE	igd	NA	NA	NA	NA	NA	NA	NA	7	131455573	0.0136	6.8e-06	14735	Cystatin D levels	TRUE	reported	GCST90274777	textfile	2	1	TRUE	0.00137239	20.2473
Cystatin D levels	18	rs150547	A	C	A	C	0.0548	-0.0389	0.4071	0.3993	FALSE	FALSE	FALSE	ieu-b-7	5	59193431	0.0225	470485	0.0832492	Parkinson's disease || id:ieu-b-7	Parkinson's disease	Parkinson's disease || ||	TRUE	igd	NA	NA	NA	NA	NA	NA	NA	5	59193431	0.0119	4.12e-06	14288	Cystatin D levels	TRUE	reported	GCST90274777	textfile	2	1	TRUE	0.00148201	21.2034
Cystatin D levels	19	rs1536565	A	G	A	G	-0.1244	-0.022	0.9481	0.9516	FALSE	FALSE	FALSE	ieu-b-7	1	102420542	0.0543	468692	0.6862	Parkinson's disease || id:ieu-b-7	Parkinson's disease	Parkinson's disease || ||	TRUE	igd	NA	NA	NA	NA	NA	NA	NA	1	102420542	0.0264	2.45e-06	14735	Cystatin D levels	TRUE	reported	GCST90274777	textfile	2	1	TRUE	0.00150463	22.2011
Cystatin D levels	20	rs1695806	A	T	A	T	-0.0711	-0.0035	0.7624	0.7612	FALSE	TRUE	FALSE	ieu-b-7	1	226828038	0.0209	482730	0.8649	Parkinson's disease || id:ieu-b-7	Parkinson's disease	Parkinson's disease || ||	TRUE	igd	TRUE	rs1695806	rs1288934	T	A	G	A	1	226824496	0.016	8.84e-06	10894	Cystatin D levels	TRUE	reported	GCST90274777	textfile	2	1	TRUE	0.00180936	19.7433
Cystatin D levels	21	rs1797042	T	C	T	C	-0.2278	0.0764	0.8749	0.8809	FALSE	FALSE	FALSE	ieu-b-7	20	23900945	0.0352	468692	0.02969	Parkinson's disease || id:ieu-b-7	Parkinson's disease	Parkinson's disease || ||	TRUE	igd	NA	NA	NA	NA	NA	NA	NA	20	23900945	0.018	1.04e-36	14288	Cystatin D levels	TRUE	reported	GCST90274777	textfile	2	1	TRUE	0.0110854	160.141
Cystatin D levels	22	rs2791713	A	G	A	G	0.0532	-0.0019	0.4536	0.4574	FALSE	FALSE	FALSE	ieu-b-7	1	207153881	0.0184	482730	0.9191	Parkinson's disease || id:ieu-b-7	Parkinson's disease	Parkinson's disease || ||	TRUE	igd	NA	NA	NA	NA	NA	NA	NA	1	207153881	0.0117	5.44e-06	14288	Cystatin D levels	TRUE	reported	GCST90274777	textfile	2	1	TRUE	0.00144495	20.6724
Cystatin D levels	23	rs35936034	T	C	T	C	0.0628	-0.0098	0.2106	0.199	FALSE	FALSE	FALSE	ieu-b-7	4	71466227	0.0238	482730	0.680801	Parkinson's disease || id:ieu-b-7	Parkinson's disease	Parkinson's disease || ||	TRUE	igd	NA	NA	NA	NA	NA	NA	NA	4	71466227	0.0142	9.75e-06	14718	Cystatin D levels	TRUE	reported	GCST90274777	textfile	2	1	TRUE	0.00132714	19.5562
Cystatin D levels	24	rs3889401	A	G	A	G	0.0885	-0.0074	0.8624	0.8446	FALSE	FALSE	FALSE	ieu-b-7	6	7051402	0.0271	482730	0.783599	Parkinson's disease || id:ieu-b-7	Parkinson's disease	Parkinson's disease || ||	TRUE	igd	NA	NA	NA	NA	NA	NA	NA	6	7051402	0.0191	3.6e-06	11759	Cystatin D levels	TRUE	reported	GCST90274777	textfile	2	1	TRUE	0.00182246	21.4657
Cystatin D levels	25	rs4507745	T	C	T	C	0.057	-0.0182	0.6482	0.6502	FALSE	FALSE	FALSE	ieu-b-7	8	56143053	0.0225	471013	0.4204	Parkinson's disease || id:ieu-b-7	Parkinson's disease	Parkinson's disease || ||	TRUE	igd	NA	NA	NA	NA	NA	NA	NA	8	56143053	0.0122	2.98e-06	13866	Cystatin D levels	TRUE	reported	GCST90274777	textfile	2	1	TRUE	0.00157179	21.8257
Cystatin D levels	26	rs4640452	A	G	A	G	0.3549	-0.0238	0.3939	0.375	FALSE	FALSE	FALSE	ieu-b-7	20	23756613	0.0205	482730	0.2464	Parkinson's disease || id:ieu-b-7	Parkinson's disease	Parkinson's disease || ||	TRUE	igd	NA	NA	NA	NA	NA	NA	NA	20	23756613	0.0117	1e-200	14288	Cystatin D levels	TRUE	reported	GCST90274777	textfile	2	1	TRUE	0.0605013	919.982
Cystatin D levels	27	rs470841	T	C	T	C	0.0568	0.0398	0.6369	0.6279	FALSE	FALSE	FALSE	ieu-b-7	18	24286681	0.023	468692	0.0830596	Parkinson's disease || id:ieu-b-7	Parkinson's disease	Parkinson's disease || ||	TRUE	igd	NA	NA	NA	NA	NA	NA	NA	18	24286681	0.0119	1.81e-06	14736	Cystatin D levels	TRUE	reported	GCST90274777	textfile	2	1	TRUE	0.00154366	22.7795
Cystatin D levels	28	rs4756151	A	C	A	C	-0.094	-0.0129	0.1273	0.1293	FALSE	FALSE	FALSE	ieu-b-7	11	34495358	0.0288	482730	0.6528	Parkinson's disease || id:ieu-b-7	Parkinson's disease	Parkinson's disease || ||	TRUE	igd	NA	NA	NA	NA	NA	NA	NA	11	34495358	0.0172	4.63e-08	14736	Cystatin D levels	TRUE	reported	GCST90274777	textfile	2	1	TRUE	0.00202274	29.8634
Cystatin D levels	29	rs4766797	A	G	A	G	-0.0574	0.0141	0.4935	0.5174	FALSE	FALSE	FALSE	ieu-b-7	12	117050587	0.024	466555	0.5589	Parkinson's disease || id:ieu-b-7	Parkinson's disease	Parkinson's disease || ||	TRUE	igd	NA	NA	NA	NA	NA	NA	NA	12	117050587	0.0117	9.3e-07	14288	Cystatin D levels	TRUE	reported	GCST90274777	textfile	2	1	TRUE	0.0016817	24.0653
Cystatin D levels	30	rs516316	C	G	C	G	0.0845	0.0058	0.4441	0.4773	FALSE	TRUE	TRUE	ieu-b-7	19	49206145	0.017	482730	0.733701	Parkinson's disease || id:ieu-b-7	Parkinson's disease	Parkinson's disease || ||	TRUE	igd	NA	NA	NA	NA	NA	NA	NA	19	49206145	0.0115	2.01e-13	14734	Cystatin D levels	TRUE	reported	GCST90274777	textfile	2	1	FALSE	0.00365097	53.9832
Cystatin D levels	31	rs58679828	A	G	A	G	0.1808	0.0165	0.0225	0.0227	FALSE	FALSE	FALSE	ieu-b-7	17	64340405	0.0636	482730	0.7952	Parkinson's disease || id:ieu-b-7	Parkinson's disease	Parkinson's disease || ||	TRUE	igd	NA	NA	NA	NA	NA	NA	NA	17	64340405	0.0407	8.9e-06	14736	Cystatin D levels	TRUE	reported	GCST90274777	textfile	2	1	TRUE	0.00133736	19.731
Cystatin D levels	32	rs60586299	T	C	T	C	-0.0654	0.0028	0.3077	0.3051	FALSE	FALSE	FALSE	ieu-b-7	18	3479423	0.0289	13655	0.9239	Parkinson's disease || id:ieu-b-7	Parkinson's disease	Parkinson's disease || ||	TRUE	igd	NA	NA	NA	NA	NA	NA	NA	18	3479423	0.0134	1.06e-06	14288	Cystatin D levels	TRUE	reported	GCST90274777	textfile	2	1	TRUE	0.00166437	23.8169
Cystatin D levels	33	rs6083489	A	G	A	G	0.2365	-0.0881	0.9818	0.9826	FALSE	FALSE	FALSE	ieu-b-7	20	24298968	0.0976	468692	0.3663	Parkinson's disease || id:ieu-b-7	Parkinson's disease	Parkinson's disease || ||	TRUE	igd	NA	NA	NA	NA	NA	NA	NA	20	24298968	0.0474	6.06e-07	14288	Cystatin D levels	TRUE	reported	GCST90274777	textfile	2	1	TRUE	0.00173931	24.8911
Cystatin D levels	34	rs62436191	A	G	A	G	0.1194	-0.0414	0.0762	0.0723	FALSE	FALSE	FALSE	ieu-b-7	6	146809314	0.0444	468692	0.3518	Parkinson's disease || id:ieu-b-7	Parkinson's disease	Parkinson's disease || ||	TRUE	igd	NA	NA	NA	NA	NA	NA	NA	6	146809314	0.0234	3.35e-07	14288	Cystatin D levels	TRUE	reported	GCST90274777	textfile	2	1	TRUE	0.00181893	26.0325
Cystatin D levels	35	rs67020211	T	G	T	G	0.079	-0.0051	0.4609	0.4369	FALSE	FALSE	FALSE	ieu-b-7	15	63639644	0.0195	482730	0.794301	Parkinson's disease || id:ieu-b-7	Parkinson's disease	Parkinson's disease || ||	TRUE	igd	NA	NA	NA	NA	NA	NA	NA	15	63639644	0.0115	6.44e-12	14734	Cystatin D levels	TRUE	reported	GCST90274777	textfile	2	1	TRUE	0.00319263	47.1845
Cystatin D levels	36	rs697699	A	C	A	C	0.1098	-0.0922	0.0675	0.0658	FALSE	FALSE	FALSE	ieu-b-7	20	51363052	0.0466	468692	0.0479402	Parkinson's disease || id:ieu-b-7	Parkinson's disease	Parkinson's disease || ||	TRUE	igd	NA	NA	NA	NA	NA	NA	NA	20	51363052	0.0237	3.61e-06	14288	Cystatin D levels	TRUE	reported	GCST90274777	textfile	2	1	TRUE	0.00149998	21.4609
Cystatin D levels	37	rs7069904	A	G	A	G	0.1309	0.0071	0.0427	0.0467	FALSE	FALSE	FALSE	ieu-b-7	10	89668276	0.0533	468692	0.8945	Parkinson's disease || id:ieu-b-7	Parkinson's disease	Parkinson's disease || ||	TRUE	igd	TRUE	rs7069904	rs34986811	A	G	C	T	10	89649838	0.0293	7.91e-06	14733	Cystatin D levels	TRUE	reported	GCST90274777	textfile	2	1	TRUE	0.0013529	19.9565
Cystatin D levels	38	rs7275493	T	C	T	C	-0.0572	0.0165	0.6243	0.6525	FALSE	FALSE	FALSE	ieu-b-7	21	18049996	0.0221	482730	0.4551	Parkinson's disease || id:ieu-b-7	Parkinson's disease	Parkinson's disease || ||	TRUE	igd	NA	NA	NA	NA	NA	NA	NA	21	18049996	0.0119	1.53e-06	14727	Cystatin D levels	TRUE	reported	GCST90274777	textfile	2	1	TRUE	0.0015664	23.1014
Cystatin D levels	39	rs72980022	A	G	A	G	0.0607	-0.0096	0.2813	0.2773	FALSE	FALSE	FALSE	ieu-b-7	2	233853187	0.022	482730	0.663201	Parkinson's disease || id:ieu-b-7	Parkinson's disease	Parkinson's disease || ||	TRUE	igd	NA	NA	NA	NA	NA	NA	NA	2	233853187	0.0126	1.45e-06	14721	Cystatin D levels	TRUE	reported	GCST90274777	textfile	2	1	TRUE	0.00157404	23.2048
Cystatin D levels	40	rs76753488	A	C	A	C	0.1171	-0.097	0.9478	0.9514	FALSE	FALSE	FALSE	ieu-b-7	2	36609059	0.0547	468692	0.0760396	Parkinson's disease || id:ieu-b-7	Parkinson's disease	Parkinson's disease || ||	TRUE	igd	NA	NA	NA	NA	NA	NA	NA	2	36609059	0.0263	8.49e-06	14736	Cystatin D levels	TRUE	reported	GCST90274777	textfile	2	1	TRUE	0.0013435	19.8218
Cystatin D levels	41	rs77121303	A	G	A	G	-0.2516	-0.0057	0.983	0.9856	FALSE	FALSE	FALSE	ieu-b-7	22	37630079	0.1014	468692	0.9552	Parkinson's disease || id:ieu-b-7	Parkinson's disease	Parkinson's disease || ||	TRUE	igd	NA	NA	NA	NA	NA	NA	NA	22	37630079	0.0532	2.25e-06	13383	Cystatin D levels	TRUE	reported	GCST90274777	textfile	2	1	TRUE	0.00166847	22.3632
Cystatin D levels	42	rs77556255	T	C	T	C	-0.3228	0.2197	0.98	0.9919	FALSE	FALSE	FALSE	ieu-b-7	8	43501515	0.4068	5380	0.5892	Parkinson's disease || id:ieu-b-7	Parkinson's disease	Parkinson's disease || ||	TRUE	igd	NA	NA	NA	NA	NA	NA	NA	8	43501515	0.0723	8.02e-06	9731	Cystatin D levels	TRUE	reported	GCST90274777	textfile	2	1	TRUE	0.0020443	19.9297
Cystatin D levels	43	rs78295068	A	G	A	G	0.0777	0.0243	0.167	0.1379	FALSE	FALSE	FALSE	ieu-b-7	10	63151878	0.0324	468692	0.453401	Parkinson's disease || id:ieu-b-7	Parkinson's disease	Parkinson's disease || ||	TRUE	igd	TRUE	rs78295068	rs12252521	A	G	C	G	10	63140238	0.0173	7.08e-06	12404	Cystatin D levels	TRUE	reported	GCST90274777	textfile	2	1	TRUE	0.00162361	20.1688
Cystatin D levels	44	rs79359257	T	C	T	C	0.073	-0.0492	0.8152	0.8159	FALSE	FALSE	FALSE	ieu-b-7	5	109366574	0.0296	468692	0.09681	Parkinson's disease || id:ieu-b-7	Parkinson's disease	Parkinson's disease || ||	TRUE	igd	NA	NA	NA	NA	NA	NA	NA	5	109366574	0.0156	2.88e-06	14288	Cystatin D levels	TRUE	reported	GCST90274777	textfile	2	1	TRUE	0.00153024	21.8945
Cystatin D levels	45	rs930735	A	G	A	G	0.0579	0.0289	0.547	0.5303	FALSE	FALSE	FALSE	ieu-b-7	1	202185979	0.0222	468692	0.1919	Parkinson's disease || id:ieu-b-7	Parkinson's disease	Parkinson's disease || ||	TRUE	igd	NA	NA	NA	NA	NA	NA	NA	1	202185979	0.0114	3.8e-07	14734	Cystatin D levels	TRUE	reported	GCST90274777	textfile	2	1	TRUE	0.0017477	25.7922
Cystatin D levels	46	rs9327707	T	C	T	C	0.059	-0.0203	0.3955	0.3918	FALSE	FALSE	FALSE	ieu-b-7	5	134512655	0.0226	470014	0.368	Parkinson's disease || id:ieu-b-7	Parkinson's disease	Parkinson's disease || ||	TRUE	igd	NA	NA	NA	NA	NA	NA	NA	5	134512655	0.0118	5.73e-07	14710	Cystatin D levels	TRUE	reported	GCST90274777	textfile	2	1	TRUE	0.00169664	24.9966
Cystatin D levels	47	rs9455923	A	G	A	G	0.0537	0.0201	0.4261	0.4054	FALSE	FALSE	FALSE	ieu-b-7	6	168345756	0.0267	13655	0.4523	Parkinson's disease || id:ieu-b-7	Parkinson's disease	Parkinson's disease || ||	TRUE	igd	NA	NA	NA	NA	NA	NA	NA	6	168345756	0.0115	3.02e-06	14734	Cystatin D levels	TRUE	reported	GCST90274777	textfile	2	1	TRUE	0.00147771	21.8019
Cystatin D levels	48	rs962720	T	C	T	C	0.0558	0.0133	0.5837	0.5648	FALSE	FALSE	FALSE	ieu-b-7	9	109490400	0.0225	468692	0.5564	Parkinson's disease || id:ieu-b-7	Parkinson's disease	Parkinson's disease || ||	TRUE	igd	NA	NA	NA	NA	NA	NA	NA	9	109490400	0.0119	2.74e-06	14287	Cystatin D levels	TRUE	reported	GCST90274777	textfile	2	1	TRUE	0.00153662	21.9844
Interleukin-10 receptor subunit alpha levels	1	rs10091841	T	G	T	G	0.064	0.0054	0.4945	0.4993	FALSE	FALSE	FALSE	ieu-b-7	8	9104264	0.0238	468692	0.8205	Parkinson's disease || id:ieu-b-7	Parkinson's disease	Parkinson's disease || ||	TRUE	igd	NA	NA	NA	NA	NA	NA	NA	8	9104264	0.0135	2.13e-06	11345	Interleukin-10 receptor subunit alpha levels	TRUE	reported	GCST90274796	textfile	2	1	TRUE	0.0019771	22.4707
Interleukin-10 receptor subunit alpha levels	2	rs12026492	T	C	T	C	0.0709	0.0432	0.2527	0.2552	FALSE	FALSE	FALSE	ieu-b-7	1	226676794	0.0221	482730	0.0510799	Parkinson's disease || id:ieu-b-7	Parkinson's disease	Parkinson's disease || ||	TRUE	igd	NA	NA	NA	NA	NA	NA	NA	1	226676794	0.0156	5.5e-06	11345	Interleukin-10 receptor subunit alpha levels	TRUE	reported	GCST90274796	textfile	2	1	TRUE	0.00181739	20.6522
Interleukin-10 receptor subunit alpha levels	3	rs1377036	A	G	A	G	-0.0791	0.0264	0.8076	0.8057	FALSE	FALSE	FALSE	ieu-b-7	20	12665512	0.0252	482730	0.295	Parkinson's disease || id:ieu-b-7	Parkinson's disease	Parkinson's disease || ||	TRUE	igd	TRUE	rs1377036	rs6041548	G	A	C	A	20	12662915	0.0179	9.92e-06	9907	Interleukin-10 receptor subunit alpha levels	TRUE	reported	GCST90274796	textfile	2	1	TRUE	0.0019672	19.5236
Interleukin-10 receptor subunit alpha levels	4	rs1406714	C	G	C	G	0.0623	0.0075	0.4267	0.436	FALSE	TRUE	TRUE	ieu-b-7	15	93461371	0.0224	468692	0.7364	Parkinson's disease || id:ieu-b-7	Parkinson's disease	Parkinson's disease || ||	TRUE	igd	NA	NA	NA	NA	NA	NA	NA	15	93461371	0.0131	1.98e-06	11783	Interleukin-10 receptor subunit alpha levels	TRUE	reported	GCST90274796	textfile	2	1	FALSE	0.00191578	22.6131
Interleukin-10 receptor subunit alpha levels	5	rs143313574	T	C	T	C	-0.3868	0.0032	0.0107	0.0152	FALSE	FALSE	FALSE	ieu-b-7	16	5247086	0.1689	11518	0.985	Parkinson's disease || id:ieu-b-7	Parkinson's disease	Parkinson's disease || ||	TRUE	igd	NA	NA	NA	NA	NA	NA	NA	16	5247086	0.0841	4.24e-06	9956	Interleukin-10 receptor subunit alpha levels	TRUE	reported	GCST90274796	textfile	2	1	TRUE	0.00212019	21.1492
Interleukin-10 receptor subunit alpha levels	6	rs17832137	A	G	A	G	0.1676	-0.0408	0.0481	0.0483	FALSE	FALSE	FALSE	ieu-b-7	14	55005535	0.0453	482730	0.3678	Parkinson's disease || id:ieu-b-7	Parkinson's disease	Parkinson's disease || ||	TRUE	igd	NA	NA	NA	NA	NA	NA	NA	14	55005535	0.0343	1.03e-06	10289	Interleukin-10 receptor subunit alpha levels	TRUE	reported	GCST90274796	textfile	2	1	TRUE	0.00231515	23.8713
Interleukin-10 receptor subunit alpha levels	7	rs180893431	A	C	A	C	0.4057	-0.0074	0.9896	0.9833	FALSE	FALSE	FALSE	ieu-b-7	6	78703747	0.1421	11518	0.9587	Parkinson's disease || id:ieu-b-7	Parkinson's disease	Parkinson's disease || ||	TRUE	igd	NA	NA	NA	NA	NA	NA	NA	6	78703747	0.0865	2.73e-06	9340	Interleukin-10 receptor subunit alpha levels	TRUE	reported	GCST90274796	textfile	2	1	TRUE	0.00234968	21.993
Interleukin-10 receptor subunit alpha levels	8	rs28408877	C	G	C	G	-0.069	-0.0011	0.7429	0.7413	FALSE	TRUE	FALSE	ieu-b-7	1	247347252	0.0249	471013	0.9636	Parkinson's disease || id:ieu-b-7	Parkinson's disease	Parkinson's disease || ||	TRUE	igd	NA	NA	NA	NA	NA	NA	NA	1	247347252	0.0153	6.49e-06	11345	Interleukin-10 receptor subunit alpha levels	TRUE	reported	GCST90274796	textfile	2	1	TRUE	0.00178951	20.3347
Interleukin-10 receptor subunit alpha levels	9	rs286605	T	G	T	G	0.0623	-0.032	0.5891	0.5745	FALSE	FALSE	FALSE	ieu-b-7	5	154443639	0.0192	482730	0.0957392	Parkinson's disease || id:ieu-b-7	Parkinson's disease	Parkinson's disease || ||	TRUE	igd	NA	NA	NA	NA	NA	NA	NA	5	154443639	0.0131	1.98e-06	11793	Interleukin-10 receptor subunit alpha levels	TRUE	reported	GCST90274796	textfile	2	1	TRUE	0.00191415	22.6131
Interleukin-10 receptor subunit alpha levels	10	rs3135932	A	G	A	G	-0.0844	-0.0165	0.8171	0.8416	FALSE	FALSE	FALSE	ieu-b-7	11	117864063	0.0233	482730	0.4784	Parkinson's disease || id:ieu-b-7	Parkinson's disease	Parkinson's disease || ||	TRUE	igd	NA	NA	NA	NA	NA	NA	NA	11	117864063	0.0168	5.07e-07	11793	Interleukin-10 receptor subunit alpha levels	TRUE	reported	GCST90274796	textfile	2	1	TRUE	0.00213557	25.2344
Interleukin-10 receptor subunit alpha levels	11	rs41272625	T	G	T	G	0.082	0.0072	0.1526	0.1698	FALSE	FALSE	FALSE	ieu-b-7	3	158540291	0.0265	482730	0.785599	Parkinson's disease || id:ieu-b-7	Parkinson's disease	Parkinson's disease || ||	TRUE	igd	NA	NA	NA	NA	NA	NA	NA	3	158540291	0.0179	4.63e-06	11784	Interleukin-10 receptor subunit alpha levels	TRUE	reported	GCST90274796	textfile	2	1	TRUE	0.00177769	20.9821
Interleukin-10 receptor subunit alpha levels	12	rs492616	A	G	A	G	-0.0835	-0.0033	0.8497	0.8675	FALSE	FALSE	FALSE	ieu-b-7	6	116712455	0.0259	482730	0.8988	Parkinson's disease || id:ieu-b-7	Parkinson's disease	Parkinson's disease || ||	TRUE	igd	NA	NA	NA	NA	NA	NA	NA	6	116712455	0.0189	9.96e-06	11344	Interleukin-10 receptor subunit alpha levels	TRUE	reported	GCST90274796	textfile	2	1	TRUE	0.00171766	19.5152
Interleukin-10 receptor subunit alpha levels	13	rs62262707	A	C	A	C	0.2156	0.1066	0.0253	0.0225	FALSE	FALSE	FALSE	ieu-b-7	3	83110489	0.0969	13655	0.2716	Parkinson's disease || id:ieu-b-7	Parkinson's disease	Parkinson's disease || ||	TRUE	igd	NA	NA	NA	NA	NA	NA	NA	3	83110489	0.0483	8.05e-06	11345	Interleukin-10 receptor subunit alpha levels	TRUE	reported	GCST90274796	textfile	2	1	TRUE	0.00175322	19.9217
Interleukin-10 receptor subunit alpha levels	14	rs6670799	A	G	A	G	-0.1247	0.0184	0.0839	0.0877	FALSE	FALSE	FALSE	ieu-b-7	1	56566352	0.0404	468692	0.649299	Parkinson's disease || id:ieu-b-7	Parkinson's disease	Parkinson's disease || ||	TRUE	igd	NA	NA	NA	NA	NA	NA	NA	1	56566352	0.0252	7.48e-07	11345	Interleukin-10 receptor subunit alpha levels	TRUE	reported	GCST90274796	textfile	2	1	TRUE	0.00215373	24.4825
Interleukin-10 receptor subunit alpha levels	15	rs74719858	A	G	A	G	0.3915	0.6881	0.9853	0.9761	FALSE	FALSE	FALSE	ieu-b-7	14	66407688	0.219	10599	0.00168	Parkinson's disease || id:ieu-b-7	Parkinson's disease	Parkinson's disease || ||	TRUE	igd	NA	NA	NA	NA	NA	NA	NA	14	66407688	0.0823	1.97e-06	10858	Interleukin-10 receptor subunit alpha levels	TRUE	reported	GCST90274796	textfile	2	1	TRUE	0.00207974	22.6248
Interleukin-10 receptor subunit alpha levels	16	rs79202194	T	C	T	C	-0.0993	-0.0162	0.1001	0.0912	FALSE	FALSE	FALSE	ieu-b-7	8	27864161	0.0393	471013	0.6801	Parkinson's disease || id:ieu-b-7	Parkinson's disease	Parkinson's disease || ||	TRUE	igd	NA	NA	NA	NA	NA	NA	NA	8	27864161	0.0224	9.29e-06	11792	Interleukin-10 receptor subunit alpha levels	TRUE	reported	GCST90274796	textfile	2	1	TRUE	0.00166376	19.6485
Interleukin-10 receptor subunit alpha levels	17	rs80137559	T	C	T	C	0.2347	0.0362	0.9822	0.9811	FALSE	FALSE	FALSE	ieu-b-7	10	18335103	0.0892	468692	0.6854	Parkinson's disease || id:ieu-b-7	Parkinson's disease	Parkinson's disease || ||	TRUE	igd	NA	NA	NA	NA	NA	NA	NA	10	18335103	0.0511	4.37e-06	11791	Interleukin-10 receptor subunit alpha levels	TRUE	reported	GCST90274796	textfile	2	1	TRUE	0.0017859	21.0917
Interleukin-10 receptor subunit alpha levels	18	rs9472032	A	C	A	C	0.0968	0.01	0.1006	0.1097	FALSE	FALSE	FALSE	ieu-b-7	6	43294041	0.0275	482730	0.7151	Parkinson's disease || id:ieu-b-7	Parkinson's disease	Parkinson's disease || ||	TRUE	igd	NA	NA	NA	NA	NA	NA	NA	6	43294041	0.0214	6.09e-06	11793	Interleukin-10 receptor subunit alpha levels	TRUE	reported	GCST90274796	textfile	2	1	TRUE	0.00173199	20.4574
Interleukin-10 receptor subunit alpha levels	19	rs9548767	T	G	T	G	-0.0686	-0.0012	0.2251	0.228	FALSE	FALSE	FALSE	ieu-b-7	13	31511360	0.026	470485	0.9646	Parkinson's disease || id:ieu-b-7	Parkinson's disease	Parkinson's disease || ||	TRUE	igd	NA	NA	NA	NA	NA	NA	NA	13	31511360	0.0155	9.61e-06	11781	Interleukin-10 receptor subunit alpha levels	TRUE	reported	GCST90274796	textfile	2	1	TRUE	0.0016599	19.5844
Interleukin-10 receptor subunit alpha levels	20	rs958402	T	C	T	C	0.06	0.0091	0.4233	0.4133	FALSE	FALSE	FALSE	ieu-b-7	8	97437587	0.0226	468692	0.686	Parkinson's disease || id:ieu-b-7	Parkinson's disease	Parkinson's disease || ||	TRUE	igd	NA	NA	NA	NA	NA	NA	NA	8	97437587	0.0134	7.55e-06	11345	Interleukin-10 receptor subunit alpha levels	TRUE	reported	GCST90274796	textfile	2	1	TRUE	0.00176409	20.0455
Matrix metalloproteinase-10 levels	1	rs10971521	A	G	A	G	-0.0585	0.0162	0.2739	0.263	FALSE	FALSE	FALSE	ieu-b-7	9	33470408	0.0251	469691	0.5185	Parkinson's disease || id:ieu-b-7	Parkinson's disease	Parkinson's disease || ||	TRUE	igd	NA	NA	NA	NA	NA	NA	NA	9	33470408	0.0132	9.34e-06	14725	Matrix metalloproteinase-10 levels	TRUE	reported	GCST90274827	textfile	2	1	TRUE	0.00133208	19.6383
Matrix metalloproteinase-10 levels	2	rs112062276	T	G	T	G	0.1203	0.0444	0.0601	0.0604	FALSE	FALSE	FALSE	ieu-b-7	6	134160498	0.0421	482730	0.2907	Parkinson's disease || id:ieu-b-7	Parkinson's disease	Parkinson's disease || ||	TRUE	igd	NA	NA	NA	NA	NA	NA	NA	6	134160498	0.0249	1.36e-06	14733	Matrix metalloproteinase-10 levels	TRUE	reported	GCST90274827	textfile	2	1	TRUE	0.00158181	23.3385
Matrix metalloproteinase-10 levels	3	rs11225354	T	C	T	C	0.2957	0.0377	0.879	0.881	FALSE	FALSE	FALSE	ieu-b-7	11	102510046	0.0277	482730	0.1732	Parkinson's disease || id:ieu-b-7	Parkinson's disease	Parkinson's disease || ||	TRUE	igd	NA	NA	NA	NA	NA	NA	NA	11	102510046	0.0181	5.38e-60	14296	Matrix metalloproteinase-10 levels	TRUE	reported	GCST90274827	textfile	2	1	TRUE	0.0183273	266.861
Matrix metalloproteinase-10 levels	4	rs112327130	C	G	C	G	-0.2862	0.3621	0.0153	0.0121	FALSE	TRUE	FALSE	ieu-b-7	8	77953661	0.1647	12517	0.0279499	Parkinson's disease || id:ieu-b-7	Parkinson's disease	Parkinson's disease || ||	TRUE	igd	NA	NA	NA	NA	NA	NA	NA	8	77953661	0.0608	2.51e-06	12456	Matrix metalloproteinase-10 levels	TRUE	reported	GCST90274827	textfile	2	1	TRUE	0.00177575	22.1545
Matrix metalloproteinase-10 levels	5	rs112966738	T	C	T	C	0.2201	0.0663	0.9801	0.9811	FALSE	FALSE	FALSE	ieu-b-7	9	81249363	0.0972	468692	0.4952	Parkinson's disease || id:ieu-b-7	Parkinson's disease	Parkinson's disease || ||	TRUE	igd	NA	NA	NA	NA	NA	NA	NA	9	81249363	0.0486	5.93e-06	14296	Matrix metalloproteinase-10 levels	TRUE	reported	GCST90274827	textfile	2	1	TRUE	0.00143262	20.5072
Matrix metalloproteinase-10 levels	6	rs113958571	A	G	A	G	-0.2315	-0.0301	0.0188	0.0188	FALSE	FALSE	FALSE	ieu-b-7	20	20711695	0.0899	468692	0.737999	Parkinson's disease || id:ieu-b-7	Parkinson's disease	Parkinson's disease || ||	TRUE	igd	NA	NA	NA	NA	NA	NA	NA	20	20711695	0.0503	4.18e-06	14296	Matrix metalloproteinase-10 levels	TRUE	reported	GCST90274827	textfile	2	1	TRUE	0.00147948	21.179
Matrix metalloproteinase-10 levels	7	rs11771706	A	C	A	C	0.2157	-0.0413	0.9813	0.9837	FALSE	FALSE	FALSE	ieu-b-7	7	13720685	0.0944	468692	0.6618	Parkinson's disease || id:ieu-b-7	Parkinson's disease	Parkinson's disease || ||	TRUE	igd	NA	NA	NA	NA	NA	NA	NA	7	13720685	0.0482	7.64e-06	14744	Matrix metalloproteinase-10 levels	TRUE	reported	GCST90274827	textfile	2	1	TRUE	0.00135644	20.0238
Matrix metalloproteinase-10 levels	8	rs12567824	A	C	A	C	0.07	0.023	0.822	0.8211	FALSE	FALSE	FALSE	ieu-b-7	1	159990022	0.0289	470219	0.4254	Parkinson's disease || id:ieu-b-7	Parkinson's disease	Parkinson's disease || ||	TRUE	igd	NA	NA	NA	NA	NA	NA	NA	1	159990022	0.0153	4.76e-06	14296	Matrix metalloproteinase-10 levels	TRUE	reported	GCST90274827	textfile	2	1	TRUE	0.00146205	20.9292
Matrix metalloproteinase-10 levels	9	rs1356799	T	G	T	G	-0.069	0.0055	0.7974	0.8063	FALSE	FALSE	FALSE	ieu-b-7	2	140567666	0.023	482730	0.8112	Parkinson's disease || id:ieu-b-7	Parkinson's disease	Parkinson's disease || ||	TRUE	igd	NA	NA	NA	NA	NA	NA	NA	2	140567666	0.015	4.22e-06	13869	Matrix metalloproteinase-10 levels	TRUE	reported	GCST90274827	textfile	2	1	TRUE	0.00152338	21.1569
Matrix metalloproteinase-10 levels	10	rs138847931	T	C	T	C	-0.3484	0.1072	0.9866	0.9857	FALSE	FALSE	FALSE	ieu-b-7	6	167150835	0.1643	11518	0.5139	Parkinson's disease || id:ieu-b-7	Parkinson's disease	Parkinson's disease || ||	TRUE	igd	NA	NA	NA	NA	NA	NA	NA	6	167150835	0.0769	5.88e-06	11439	Matrix metalloproteinase-10 levels	TRUE	reported	GCST90274827	textfile	2	1	TRUE	0.00179117	20.5224
Matrix metalloproteinase-10 levels	11	rs139747874	T	C	T	C	-0.2523	-0.0147	0.9867	0.9856	FALSE	FALSE	FALSE	ieu-b-7	20	37234290	0.0996	468692	0.8824	Parkinson's disease || id:ieu-b-7	Parkinson's disease	Parkinson's disease || ||	TRUE	igd	NA	NA	NA	NA	NA	NA	NA	20	37234290	0.0567	8.6e-06	13422	Matrix metalloproteinase-10 levels	TRUE	reported	GCST90274827	textfile	2	1	TRUE	0.00147303	19.7972
Matrix metalloproteinase-10 levels	12	rs142915220	A	G	A	G	-0.3256	-0.1277	0.9794	0.9848	FALSE	FALSE	FALSE	ieu-b-7	11	102881952	0.0977	468692	0.1914	Parkinson's disease || id:ieu-b-7	Parkinson's disease	Parkinson's disease || ||	TRUE	igd	NA	NA	NA	NA	NA	NA	NA	11	102881952	0.0494	4.37e-11	13809	Matrix metalloproteinase-10 levels	TRUE	reported	GCST90274827	textfile	2	1	TRUE	0.00313609	43.4362
Matrix metalloproteinase-10 levels	13	rs17099622	A	G	A	G	-0.2064	0.0189	0.9296	0.9263	FALSE	FALSE	FALSE	ieu-b-7	11	102700352	0.037	482730	0.610299	Parkinson's disease || id:ieu-b-7	Parkinson's disease	Parkinson's disease || ||	TRUE	igd	NA	NA	NA	NA	NA	NA	NA	11	102700352	0.0233	8.12e-19	14296	Matrix metalloproteinase-10 levels	TRUE	reported	GCST90274827	textfile	2	1	TRUE	0.00545903	78.4597
Matrix metalloproteinase-10 levels	14	rs17860955	T	C	T	C	1.1371	-0.0254	0.983	0.9793	FALSE	FALSE	FALSE	ieu-b-7	11	102649482	0.0621	482730	0.682801	Parkinson's disease || id:ieu-b-7	Parkinson's disease	Parkinson's disease || ||	TRUE	igd	NA	NA	NA	NA	NA	NA	NA	11	102649482	0.047	2.6e-129	14256	Matrix metalloproteinase-10 levels	TRUE	reported	GCST90274827	textfile	2	1	TRUE	0.0394393	585.249
Matrix metalloproteinase-10 levels	15	rs181816009	A	G	A	G	-0.1769	0.0386	0.0368	0.0401	FALSE	FALSE	FALSE	ieu-b-7	6	31428447	0.0477	480593	0.4176	Parkinson's disease || id:ieu-b-7	Parkinson's disease	Parkinson's disease || ||	TRUE	igd	TRUE	rs181816009	rs77004371	A	G	C	T	6	31423412	0.0358	7.76e-07	11985	Matrix metalloproteinase-10 levels	TRUE	reported	GCST90274827	textfile	2	1	TRUE	0.00203314	24.4128
Matrix metalloproteinase-10 levels	16	rs192820441	A	G	A	G	0.2701	-0.1093	0.9874	0.9834	FALSE	FALSE	FALSE	ieu-b-7	12	117560675	0.1618	11518	0.4992	Parkinson's disease || id:ieu-b-7	Parkinson's disease	Parkinson's disease || ||	TRUE	igd	NA	NA	NA	NA	NA	NA	NA	12	117560675	0.0603	7.49e-06	13394	Matrix metalloproteinase-10 levels	TRUE	reported	GCST90274827	textfile	2	1	TRUE	0.00149573	20.0609
Matrix metalloproteinase-10 levels	17	rs2584662	A	C	A	C	-0.0597	0.015	0.585	0.5735	FALSE	FALSE	FALSE	ieu-b-7	17	47470487	0.0193	482730	0.437	Parkinson's disease || id:ieu-b-7	Parkinson's disease	Parkinson's disease || ||	TRUE	igd	NA	NA	NA	NA	NA	NA	NA	17	47470487	0.0122	9.91e-07	14296	Matrix metalloproteinase-10 levels	TRUE	reported	GCST90274827	textfile	2	1	TRUE	0.0016722	23.9424
Matrix metalloproteinase-10 levels	18	rs34387740	A	G	A	G	0.0845	-0.0094	0.1751	0.1712	FALSE	FALSE	FALSE	ieu-b-7	9	136375396	0.0276	482730	0.732399	Parkinson's disease || id:ieu-b-7	Parkinson's disease	Parkinson's disease || ||	TRUE	igd	NA	NA	NA	NA	NA	NA	NA	9	136375396	0.019	8.69e-06	11345	Matrix metalloproteinase-10 levels	TRUE	reported	GCST90274827	textfile	2	1	TRUE	0.00174038	19.7756
Matrix metalloproteinase-10 levels	19	rs3742926	T	C	T	C	-0.0912	0.0133	0.0978	0.0914	FALSE	FALSE	FALSE	ieu-b-7	14	33014869	0.0288	482730	0.6455	Parkinson's disease || id:ieu-b-7	Parkinson's disease	Parkinson's disease || ||	TRUE	igd	NA	NA	NA	NA	NA	NA	NA	14	33014869	0.0196	3.27e-06	14744	Matrix metalloproteinase-10 levels	TRUE	reported	GCST90274827	textfile	2	1	TRUE	0.00146631	21.648
Matrix metalloproteinase-10 levels	20	rs516316	C	G	C	G	0.1003	0.0058	0.4452	0.4773	FALSE	TRUE	TRUE	ieu-b-7	19	49206145	0.017	482730	0.733701	Parkinson's disease || id:ieu-b-7	Parkinson's disease	Parkinson's disease || ||	TRUE	igd	NA	NA	NA	NA	NA	NA	NA	19	49206145	0.0117	1.01e-17	14742	Matrix metalloproteinase-10 levels	TRUE	reported	GCST90274827	textfile	2	1	FALSE	0.00496037	73.4804
Matrix metalloproteinase-10 levels	21	rs55804377	A	G	A	G	-0.2185	-0.0573	0.0185	0.0201	FALSE	FALSE	FALSE	ieu-b-7	10	1063892	0.0868	468692	0.508899	Parkinson's disease || id:ieu-b-7	Parkinson's disease	Parkinson's disease || ||	TRUE	igd	NA	NA	NA	NA	NA	NA	NA	10	1063892	0.0469	3.18e-06	14741	Matrix metalloproteinase-10 levels	TRUE	reported	GCST90274827	textfile	2	1	TRUE	0.00147025	21.7019
Matrix metalloproteinase-10 levels	22	rs72699188	C	G	C	G	-0.0931	0.012	0.8507	0.8316	FALSE	TRUE	FALSE	ieu-b-7	9	6176871	0.0249	482730	0.6292	Parkinson's disease || id:ieu-b-7	Parkinson's disease	Parkinson's disease || ||	TRUE	igd	NA	NA	NA	NA	NA	NA	NA	9	6176871	0.0166	2.04e-08	14744	Matrix metalloproteinase-10 levels	TRUE	reported	GCST90274827	textfile	2	1	TRUE	0.00212884	31.4503
Matrix metalloproteinase-10 levels	23	rs7683424	A	G	A	G	0.054	-0.0101	0.4046	0.3964	FALSE	FALSE	FALSE	ieu-b-7	4	187115945	0.0181	482730	0.5749	Parkinson's disease || id:ieu-b-7	Parkinson's disease	Parkinson's disease || ||	TRUE	igd	NA	NA	NA	NA	NA	NA	NA	4	187115945	0.0121	8.09e-06	14296	Matrix metalloproteinase-10 levels	TRUE	reported	GCST90274827	textfile	2	1	TRUE	0.00139123	19.9139
Matrix metalloproteinase-10 levels	24	rs7966257	C	G	C	G	-0.0819	-0.01	0.1335	0.1359	FALSE	TRUE	FALSE	ieu-b-7	12	111251437	0.0287	482730	0.727699	Parkinson's disease || id:ieu-b-7	Parkinson's disease	Parkinson's disease || ||	TRUE	igd	NA	NA	NA	NA	NA	NA	NA	12	111251437	0.0178	4.2e-06	14295	Matrix metalloproteinase-10 levels	TRUE	reported	GCST90274827	textfile	2	1	TRUE	0.00147877	21.1674
Latency-associated peptide transforming growth factor beta 1 levels	1	rs10403201	A	G	A	G	-0.0597	0.0231	0.292	0.3126	FALSE	FALSE	FALSE	ieu-b-7	19	14764810	0.0182	482730	0.204	Parkinson's disease || id:ieu-b-7	Parkinson's disease	Parkinson's disease || ||	TRUE	igd	NA	NA	NA	NA	NA	NA	NA	19	14764810	0.0125	1.79e-06	14730	Latency-associated peptide transforming growth factor beta 1 levels	TRUE	reported	GCST90274818	textfile	2	1	TRUE	0.00154616	22.8071
Latency-associated peptide transforming growth factor beta 1 levels	2	rs10508556	T	C	T	C	0.0523	0.0033	0.4627	0.4477	FALSE	FALSE	FALSE	ieu-b-7	10	18285342	0.0193	482730	0.8647	Parkinson's disease || id:ieu-b-7	Parkinson's disease	Parkinson's disease || ||	TRUE	igd	NA	NA	NA	NA	NA	NA	NA	10	18285342	0.0114	4.48e-06	14735	Latency-associated peptide transforming growth factor beta 1 levels	TRUE	reported	GCST90274818	textfile	2	1	TRUE	0.00142634	21.0443
Latency-associated peptide transforming growth factor beta 1 levels	3	rs114152855	T	C	T	C	-0.299	-0.1302	0.0112	0.0112	FALSE	FALSE	FALSE	ieu-b-7	4	175537640	0.1358	466555	0.3375	Parkinson's disease || id:ieu-b-7	Parkinson's disease	Parkinson's disease || ||	TRUE	igd	NA	NA	NA	NA	NA	NA	NA	4	175537640	0.0613	1.07e-06	14249	Latency-associated peptide transforming growth factor beta 1 levels	TRUE	reported	GCST90274818	textfile	2	1	TRUE	0.00166691	23.7881
[truncated: 2,200 more rows]

## Sheet: Alcohol on immunity
The information of the SNPs used as IVs for the alcohol on circulating inflammatory proteins.
[truncated: 856 more rows]
