# Supplementary material for: Protective Evidence for Alcohol Consumption in Parkinson’s Disease Risk and Associated Genes of DPP6, SLC39A8, MAD1L1, and RBFOX1
Source: Research Square preprint supplement (doi:10.21203/rs.3.rs-6754726/v1), 2025-05-29
Supplement: Supplementary file 5 [file b0c3140c6d552ef5fb5466f9.xlsx]

## Sheet: Table S3
Table S3. Clinical data of PD from Xuzhou
No	Diagnosis	Sex (Female 1, Male 2)	Age	Alcoholic drinking	Years of drink	Frequency (/week)
1	PD	1	84	0	-	-
2	PD	2	-	-	-	-
3	PD	2	54	1	35	-
4	PD	2	78	1	44	7
5	PD	2	-	-	-	-
6	PD	1	67	1	45	7
7	PD	1	65	0	-	-
8	PD	2	85	0	-	-
9	PD	2	-	-	-	-
10	PD	2	57	1	33	4																																								5
11	PD	1	77	0	-	-																																								2
12	PD	2	-	-	-	-
13	PD	1	-	-	-	-
14	PD	2	-	-	-	-
15	PD	2	68	1	27	14
16	PD	1	-	-	-	-
17	PD	2	63	0	-	-
18	PD	1	64	0	-	-
19	PD	2	-	-	-	-
20	PD	1	68	0	-	-
21	PD	2	78	1	50	7
22	PD	1	-	-	-	-
23	PD	1	87	0	-	-
24	PD	2	68	0	-	-
25	PD	2	68	0	-	-
26	PD	1	61	0	-	-
27	PD	2	74	1	30	7
28	PD	2	70	0	-	-
29	PD	2	82	1	45	14
30	PD	1	53	0	-	-
31	PD	2	80	0	-	-
32	PD	1	80	0	-	-
33	PD	2	70	0	-	-
34	PD	2	79	0	-	-
35	PD	1	74	0	-	-
36	PD	2	62	1	30	3
37	PD	2	-	-	-	-
38	PD	2	-	-	-	-
39	PD	2	-	-	-	-
40	PD	1	70	0	-	-
41	PD	1	73	0	-	-
42	PD	1	71	0	-	-
43	PD	2	60	0	-	-
44	PD	2	59	1	40	-
45	PD	2	78	0	-	-
46	PD	2	-	-	-	-
47	PD	1	-	-	-	-
48	PD	2	75	0	-	-
49	PD	2	75	1	34	14
50	PD	1	-	0	-	-
51	PD	2	68	1	44	7
52	PD	2	46	0	-	-
53	PD	1	63	0	-	-
54	PD	2	65	-	-	-
55	PD	2	70	1	44	10
56	PD	1	60	0	-	-
57	PD	1	-	-	-	-
58	PD	1	70	0	-	-
59	PD	1	81	0	-	-
60	PD	2	60	1	40	5
61	PD	2	80	0	-	-
62	PD	1	50	0	-	-
63	PD	1	64	0	-	-
64	PD	2	-	-	-	-
65	PD	2	55	0	-	-
66	PD	1	68	0	-	-
67	PD	1	72	0	-	-
68	PD	2	72	0	-	-
69	PD	2	61	0	-	-
70	PD	2	-	1	-	-
71	PD	2	72	0	-	-
72	PD	2	74	0	-	-
73	PD	2	43	0	-	-
74	PD	2	74	1	45	7
75	PD	1	75	0	-	-
76	PD	2	71	0	-	-
77	PD	1	70	0	-	-
78	PD	2	68	0	-	-
79	PD	2	79	0	-	-
80	PD	2	73	0	-	-
81	PD	1	56	0	-	-
82	PD	2	-	-	-	-
83	PD	2	-	-	-	-
84	PD	2	-	-	-	-
85	PD	1	-	-	-	-
86	PD	2	66	0	-	-
87	PD	1	72	0	-	-
88	PD	2	65	0	-	-
89	PD	2	74	0	-	-
90	PD	2	69	1	40	-
91	PD	2	68	0	-	-
92	PD	1	-	-	-	-
93	PD	2	75	0	-	-
94	PD	1	62	0	-	-
95	PD	2	48	0	-	-
96	PD	2	65	1	30	7
97	PD	1	-	-	-	-
98	PD	1	76	0	-	-
99	PD	2	75	0	-	-
100	PD	1	61	0	-	-
101	PD	1	71	0	-	-
102	PD	1	63	0	-	-
103	PD	1	-	-	-	-
104	PD	2	-	-	-	-
105	PD	2	62	0	-	-
106	PD	2	72	0	-	-
107	PD	1	71	0	-	-
108	PD	2	-	-	-	-
109	PD	1	-	-	-	-
110	PD	2	70	1	20	7
111	PD	2	72	1	-	-
112	PD	2	53	0	-	-
113	PD	1	53	0	-	-
114	PD	1	59	0	-	-
115	PD	1	-	-	-	-
116	PD	1	59	0	-	-
117	PD	1	67	0	-	-
118	PD	1	53	0	-	-
119	PD	1	60	0	-	-
120	PD	1	71	0	-	-
121	PD	1	69	0	-	-
122	PD	1	-	-	-	-
123	PD	1	-	-	-	-
124	PD	1	60	0	-	-
125	PD	1	-	-	-	-
126	PD	1	73	0	-	-
127	PD	1	-	-	-	-
128	PD	1	59	0	-	-
129	PD	1	71	0	-	-
130	PD	1	63	0	-	-
131	PD	1	-	-	-	-
132	PD	1	-	-	-	-
133	PD	1	60	0	-	-
134	PD	1	68	0	-	-
135	PD	1	-	-	-	-
136	PD	1	58	0	-	-
137	PD	1	55	0	-	-
138	PD	1	77	0	-	-
139	PD (DBS)	2	-	-	-	-
140	PD (DBS)	2	63	0	-	-
141	PD (DBS)	1	57	0	-	-
142	PD (DBS)	1	-	-	-	-
143	PD?	2	-	-	-	-
144	PD?	1	55	0	-	-
