# Supplementary material for: Protective Evidence for Alcohol Consumption in Parkinson’s Disease Risk and Associated Genes of DPP6, SLC39A8, MAD1L1, and RBFOX1
Source: Research Square preprint supplement (doi:10.21203/rs.3.rs-6754726/v1), 2025-05-29
Supplement: Supplementary file 6 [file dd0c1ea0f81f2eec7ca1b583.xlsx]

## Sheet: Table S2
Table S2. Clinical data of PD from Tianjin
					History						Clinical examination
No.	Age	Gender (Female 1, Male 2)	Operation data	Clinical diagnosis	Hypertension	Diabetes	Coronary heart disease	Cerebral infarction	Smoking	Drinking	Systolic pressure	Diastolic pressure	WBC	Neu#	Lym#	Uric acid
1	74	1	2023.9.20	PD	1	0	1	1	0	0	139	64	5.76	3.68	1.57	209
2	41	2	2023.9.11	PD	0	0	0	0	0	0	124	82	15.27	13.59	0.71	391
3	72	1	2023.10.11	PD	0	0	0	0	0	0	123	75	9.96	8.42	0.91	167
4	71	1	2023.10.18	PD	1	1	0	0	0	0	112	69	11.09	10.05	0.58	253
5	60	1	2023.10.13	PD	0	0	0	1	0	0	129	75	6.19	3.71	1.94	94
6	63	2	2023.10.20	PD	0	0	0	0	0	1	111	70	17.79	15.7	1.23	192
7	50	2	2023.10.27	PD	0	0	0	0	0	0	136	82	6.21	4.55	1.09	289
8	64	2	2023.11.18	PD	0	0	0	0	0	0	160	89	13.59	11.15	1.5	208
9	50	1	2023.11.09	PD	0	0	0	0	0	0	118	60	11.87	10.78	0.81	221
10	67	2	2023.11.10	PD	0	0	1	0	0	0	116	73	9.6	8.02	1.01	198
11	60	2	2023.11.13	PD	0	0	0	0	0	0	131	84	10.11	8.54	1.16	341
12	75	2	2023.11.15	PD	0	0	0	0	1	0	120	84	7.46	5.47	1.34	87
13	76	1	2023.11.24	PD	0	0	0	0	0	0	128	71	7.4	3.69	2.76	419
14	70	2	2023.12.06	PD	1	0	0	0	1	1	136	81	8.05	6.65	0.84	277
15	76	2	2024.1.16	PD	0	0	0	0	0	0	125	85	7.34	0.01	0.91	300
16	68	2	2024.1.22	PD	0	0	0	0	0	0	116	58	7.08	4.85	1.03	200
17	60	2	2024.1.25	PD	0	0	0	0	0	0	110	50	10.15	8.06	1.28	255
18	68	2	2024.1.26	PD	1	0	0	0	0	0	136	79	9.4	8.35	0.71	168
19	70	1	2024.1.10	PD	1	1	0	0	0	0	116	58	6.45	5.2	0.7	301
20	39	2	2024.2.04	PD	0	0	0	0	1	1	116	58	7.91	6.69	0.89	256
21	76	1	2024.2.23	PD	0	1	0	0	0	0	116	65	14.24	12.32	0.65	360
22	66	1	2024.2.28	PD	0	0	0	0	0	0	130	70	9.06	7.9	0.74	217
23	61	1	2024.2.21	PD	0	0	0	0	0	0	116	58	11.62	10.23	0.92	125
24	83	2	2024.3.01	PD	0	0	0	1	0	0	137	87	12.2	10.5	0.94	193
25	66	1	2024.3.02	PD	0	0	0	0	0	0	121	64	3.77	1.96	1.58	163
26	63	2	2024.3.19	PD	0	0	0	0	1	1	126	79	8	6.64	1.14	329
27	63	1	2024.3.20	PD	1	0	1	0	0	0	116	58	11.09	9.53	1.07	179
28	73	2	2024.3.22	PD	0	1	0	0	0	0	116	58	9.4	8.42	0.57	214
29	64	2	2024.3.21	PD	0	0	0	0	0	0	116	58	6.14	4.05	1.62	185
30	59	1	2024.3.29	PD	0	0	0	0	0	0	117	63	8.14	7.13	0.72	131
31	69	1	2024.4.08	PD	0	0	0	0	0	0	116	58	7.75	6.79	0.88	425
32	66	2	2024.4.16	PD	0	0	0	0	0	0	185	121	7.81	6.67	0.7	235
33	68	1	2024.4.12	PD	1	1	0	0	0	0	165	82	4.15	2.49	1.4	204
34	79	1	2024.4.17	PD	1	0	0	0	0	0	152	71	5.25	3.77	0.81	208
35	70	2	2024.4.26	PD	0	1	0	0	1	1	115	81	7.94	6.86	0.66	255
36	76	2	2024.4.30	PD	0	0	1	0	0	0	138	85	9.19	7.07	1.25	248
37	68	2	2024.5.10	PD	0	0	0	0	1	1	123	77	5.54	3.09	1.74	175
38	61	2	2024.5.17	PD	0	0	0	0	0	0	148	83	8.2	7.01	0.84	318
39	62	1	2024.5.20	PD	0	0	0	0	0	0	111	64	6.05	4.94	0.79	128
40	66	1	2024.5.21	PD	1	0	0	1	0	0	156	89	9.57	8.46	0.69	287
41	64	2	2024.5.24	PD	0	0	0	0	0	0	110	80	11.62	8.62	1.97	278
42	73	1	2024.6.05	PD	0	0	0	0	0	0	135	80	6.43	4.27	1.54	232
43	73	1	2024.7.10	PD	1	0	0	0	0	0	112	67	7.87	6.2	1.09	313
44	68	1	2024.7.26	PD	1	0	0	0	0	0	148	74	8.7	7.2	0.85	171
45	61	2	2024.8.09	PD	0	0	0	0	0	0	166	108	4.98	4.16	0.44	236
46	67	1	2024.8.16	PD	0	0	0	0	0	0	139	73	12.75	10.83	1.46	271
47	66	1	2023.12.1	PD	0	0	0	0	0	0	112	82	7.99	6.35	1.33	208
48	69	2	2023.11.27	PD	0	0	0	0	0	0	128	79	9.63	7.8	1.28	132
49	76	2	2023.11.2	PD	1	0	0	0	0	0	134	79	5.17	3.48	1.17	290
50	56	1	2023.9.26	PD	1	1	0	0	0	0	130	85	7.16	3.11	2.85	465
51	56	1	2023.9.13	PD	0	0	0	0	0	0	115	71	3.5	1.4	1.36	260
52	71	1	2023.8.9	PD	0	0	0	0	0	0	130	78	11.36	10.46	0.49	260
53	50	1	2023.8.4	PD	1	0	0	0	0	0	125	75	12.31	10.73	0.96	331
54	64	1	2023.7.19	PD	0	0	0	0	0	0	164	90	4.03	1.91	1.51	351
55	64	2	2023.7.5	PD	0	0	0	0	1	0	125	76	11.29	9.49	1.22	248
56	67	1	2023.7.2	PD	0	0	0	0	0	0	135	75	11.74	10.38	0.69	186
57	70	1	2023.6.29	PD	0	0	0	0	0	0	135	76	12.48	10.64	1.22	224
58	77	1	2023.6.8	PD	0	0	0	0	0	0	140	75	11.77	10.43	0.68	172
59	36	1	2023.6.5	PD	0	0	0	0	0	0	120	75	6.85	4.23	2.17	313
60	72	2	2023.6.1	PD	0	1	0	0	1	0	130	85	9.08	7.33	1.41	296
61	64	1	2023.5.30	PD	1	0	0	0	0	0	130	80	6.23	5.44	0.54	233
62	52	2	2023.5.29	PD	0	0	0	0	0	0	142	95	14.28	12.45	1.08	365
63	52	2	2023.5.24	PD	0	0	0	0	0	0	132	70	13.33	11.19	1.15	314
64	73	2	2023.5.15	PD	0	0	0	0	1	1	110	80	5.4	3.44	1.32	377
65	73	2	2023.5.5	PD	0	0	0	0	0	0	120	80	8.7	6.92	1.29	285
66	65	2	2023.5.4	PD	1	0	0	0	0	0	107	69	7.18	5.69	1.09	138
67	66	1	2023.4.27	PD	1	0	0	0	0	0	130	75	11.31	9.61	1.17	317
68	66	2	2023.4.20	PD	0	0	0	0	1	0	118	75	9.35	7.51	1.16	222
69	68	2	2023.4.19	PD	0	0	0	0	1	1	122	66	14.15	12.77	0.86	221
70	76	1	2023.4.3	PD	0	0	0	0	0	0	136	78	5.24	3.59	1.02	291
71	58	2	2023.4.1	PD	0	0	0	0	0	0	113	63	9.76	8.09	1.12	147
72	53	2	2023.3.20	PD	0	0	0	0	1	0	168	107	10.76	8.82	1.35	385
73	66	2	2023.3.8	PD	0	0	0	0	1	0	111	59	6.85	5.13	1	177
74	59	2	2023.3.10	PD	0	0	0	1	1	1	149	71	7.23	5.12	1.52	470
75	72	2	2023.2.27	PD	1	0	1	0	0	0	116	58	11.19	9.42	1.15	383
76	66	2	2023.2.20	PD	0	0	0	0	1	0	116	58	11.5	9.4	1.76	208
77	72	1	2024.3.5	PD	1	0	0	0	0	0	130	80	5.97	3.67	1.83	319
78	68	2	2024.4.25	PD	0	0	0	0	0	0	113	79	9.63	7.91	1.47	315
79	73	2	2024.5.27	PD	1	0	1	0	1	0	134	54	4.35	2.46	1.46	321
80	69	2	2023.2.10	PD	1	1	0	0	0	0	147	80	9.11	7.82	0.72	219
81	69	2	2022.1.10	PD	0	0	0	0	0	0	100	46	13.53	12.07	0.98	244
82	80	2	2022.2.10	PD	0	0	0	0	1	0	125	81	6.41	3.57	2.28	307
83	76	1	2022.3.2	PD	1	0	1	0	0	0	117	75	6.07	3.97	1.66	255
84	60	1	2022.3.4	PD	0	0	0	0	0	0	120	80	10.54	8.59	1.42	156
85	74	2	2022.3.23	PD	1	0	0	0	0	0	122	71	9.48	7.84	1.06	166
86	76	2	2022.4.6	PD	1	0	0	0	0	0	150	92	11.93	10.74	0.97	395
87	74	2	2022.4.18	PD	0	0	0	0	0	0	149	83	12.41	10.8	0.78	184
88	81	1	2022.4.25	PD	0	0	0	0	0	0	127	70	9.92	8.34	0.97	275
89	74	2	2022.6.29	PD	0	0	0	0	0	0	142	75	6.06	3.82	1.6	284
90	76	1	2022.7.11	PD	0	1	0	0	0	0	115	72	10.88	9.98	0.65	319
91	58	2	2022.7.13	PD	1	1	0	0	0	0	137	75	7.76	6.96	0.54	262
92	73	2	2022.7.12	PD	0	0	0	0	0	0	117	72	10.82	9.38	0.84	316
93	75	2	2022.7.22	PD	0	0	0	0	1	0	110	72	7.24	5.39	1.35	250
94	60	1	2022.7.22	PD	0	0	0	0	0	0	117	60	11.54	10.83	0.54	194
95	68	2	2022.10.7	PD	0	0	0	0	0	0	116	58	6.97	4.28	2.27	355
96	67	1	2022.11.8	PD	0	0	1	0	0	0	116	58	8.73	7.05	1.16	374
97	76	2	2022.11.22	PD	0	0	1	0	0	0	138	72	5.47	4.1	0.8	365
98	84	1	2022.11.26	PD	0	0	0	0	0	0	116	58	6.19	4.21	1.44	315
99	64	1	2022.12.21	PD	0	0	0	0	0	0	156	91	5.15	4.41	0.52	165
100	70	2	2022.12.30	PD	1	0	0	0	0	0	128	75	10.47	8.96	0.94	162
